# Supplementary material for: Zoonotic Transmission of Campylobacter jejuni to Caretakers From Sick Pen Calves Carrying a Mixed Population of Strains With and Without Guillain Barré Syndrome-Associated Lipooligosaccharide Loci
Source: Front Microbiol. 2022 Apr 29;13:800269. doi: 10.3389/fmicb.2022.800269 (PMC9112162; doi:10.3389/fmicb.2022.800269)
Supplement: Supplementary Table 1 — Presence/absence of 55 LOS open reading frames in calf isolates. This table contains contiguous homologs in each isolate to the 55 LOS loci detailed in Parker et al. (2005, 2008) and Richards et al. (2013). Homologs were identified by conducting TBLASTN of individual reference sequences to the genome of each isolate. E values ≤ 1 × 10–30 are reported as positive hits; E values ≥ 1 × 10–30 are reported as “no match.” Only hits having the smallest E values (least likelihood of occurring by chance) are shown. [file Table_1.csv]

Sequence type	ST922			ST929			ST806				ST6227		ST982
Strain	LM03	LM12	TW16491	LM01	LM19	LM21	LM08	LM10	LM13	LM26	LM05	LM11	LM24
Genbank accession number (orf number; locus)	RAST peg number (BLAST E value). Only hits having the smallest E values (least likelihood of occurring by chance) are shown.
>AF215659 (orf1)	fig|6666666.157400.peg.410 (7e-83)	fig|6666666.157405.peg.400 (7e-83)	fig|6666666.157418.peg.401 (7e-83)	fig|6666666.157468.peg.315 (2e-83)	fig|6666666.157411.peg.594 (2e-83)	fig|6666666.157414.peg.619 (2e-83)	fig|6666666.157402.peg.461 (4e-84)	fig|6666666.157403.peg.409 (4e-84)	fig|6666666.157406.peg.423 (4e-84)	fig|6666666.157416.peg.603 (4e-84)	fig|6666666.157401.peg.301 (8e-83)	fig|6666666.157404.peg.394 (8e-83)	fig|6666666.157415.peg.246 (7e-83)
>AL111168 (orf1)	fig|6666666.157400.peg.408 ( (0.0))	fig|6666666.157405.peg.398 (0.0)	fig|6666666.157418.peg.399 (0.0)	fig|6666666.157468.peg.313 (0.0)	fig|6666666.157411.peg.596 (0.0)	fig|6666666.157414.peg.617 (0.0)	fig|6666666.157402.peg.459 (0.0)	fig|6666666.157403.peg.407 (0.0)	fig|6666666.157406.peg.421 (0.0)	fig|6666666.157416.peg.601 (0.0)	fig|6666666.157401.peg.303 (0.0)	fig|6666666.157404.peg.392 (0.0)	fig|6666666.157415.peg.248 (0.0)
>AF215659 (orf2)	fig|6666666.157400.peg.411 (0.0)	fig|6666666.157405.peg.401 (0.0)	fig|6666666.157418.peg.402 571 (0.0)	fig|6666666.157468.peg.316 (0.0)	fig|6666666.157411.peg.593 (0.0)	fig|6666666.157414.peg.620 (0.0)	fig|6666666.157402.peg.462 (0.0)	fig|6666666.157403.peg.410 (0.0)	fig|6666666.157406.peg.424 (0.0)	fig|6666666.157416.peg.604 592 (0.0)	fig|6666666.157401.peg.300 (0.0)	fig|6666666.157404.peg.395 (0.0)	fig|6666666.157415.peg.245 (0.0)
>AF215659 (orf3)	fig|6666666.157400.peg.412 ( 2e-48)	fig|6666666.157405.peg.402 (2e-48)	fig|6666666.157418.peg.403 (2e-48)	fig|6666666.157468.peg.317 (0.0)	fig|6666666.157411.peg.592 (0.0)	fig|6666666.157414.peg.621 (0.0)	fig|6666666.157402.peg.463 (0.0)	fig|6666666.157403.peg.411 (0.0)	fig|6666666.157406.peg.425 (0.0)	no match < 1e-30	fig|6666666.157401.peg.299 (0.0)	fig|6666666.157404.peg.396 (0.0)	fig|6666666.157415.peg.244 (0.0)
>AL111168 (orf3)	fig|6666666.157400.peg.410 (0.0)	fig|6666666.157405.peg.400 (0.0)	fig|6666666.157418.peg.401 (0.0)	fig|6666666.157468.peg.315 (0.0)	fig|6666666.157411.peg.594 (0.0)	fig|6666666.157414.peg.619 (0.0)	fig|6666666.157402.peg.461 (0.0)	fig|6666666.157403.peg.409 (0.0)	fig|6666666.157406.peg.423 (0.0)	fig|6666666.157416.peg.603 (0.0)	fig|6666666.157401.peg.301 (0.0)	fig|6666666.157404.peg.394 (0.0)	fig|6666666.157415.peg.246 (0.0)
>AF215659 (orf4)	no match < 1e-30	no match < 1e-30	no match < 1e-30	fig|6666666.157468.peg.319 (9e-50)	fig|6666666.157411.peg.590 (9e-50)	fig|6666666.157414.peg.21 (3e-88)	fig|6666666.157402.peg.464 (0.0)	fig|6666666.157403.peg.412 (0.0)	fig|6666666.157406.peg.426 (0.0)	fig|6666666.157416.peg.1438 (0.0)	fig|6666666.157401.peg.298 (0.0)	fig|6666666.157404.peg.397 (0.0)	fig|6666666.157415.peg.243 (0.0)
>AF215659 (orf5, cgtA)	fig|6666666.157400.peg.422 (e-106)	fig|6666666.157405.peg.412 (e-106)	fig|6666666.157418.peg.413 (e-106)	no match < 1e-30	no match < 1e-30	no match < 1e-30	fig|6666666.157402.peg.465 (0.0)	fig|6666666.157403.peg.413 (e-176)	fig|6666666.157406.peg.427 (e-176)	fig|6666666.157416.peg.1439 (e-176)	fig|6666666.157401.peg.290 (2e-92)	fig|6666666.157404.peg.405 (2e-92)	fig|6666666.157415.peg.236 (2e-92)
>AF215659 (orf6, cgtB)	fig|6666666.157400.peg.426 (1e-49)	fig|6666666.157405.peg.416 (1e-49)	fig|6666666.157418.peg.417 (1e-49)	fig|6666666.157468.peg.320 (1e-84)	fig|6666666.157411.peg.589 (1e-84)	fig|6666666.157414.peg.624 (1e-84)	fig|6666666.157402.peg.466 (e-106)	fig|6666666.157403.peg.414 (e-106)	fig|6666666.157406.peg.428 (e-106)	fig|6666666.157416.peg.1440 (e-106)	fig|6666666.157401.peg.294 (6e-65)	fig|6666666.157404.peg.401 (6e-65)	fig|6666666.157415.peg.240 (e-102)
>AF215659 (orf7, cstII)	no match < 1e-30	no match < 1e-30	no match < 1e-30	no match < 1e-30	no match < 1e-30	no match < 1e-30	fig|6666666.157402.peg.467 (e-163)	fig|6666666.157403.peg.415 (e-163)	fig|6666666.157406.peg.429 (e-163)	fig|6666666.157416.peg.1441 (e-163)	fig|6666666.157401.peg.293 (e-100)	fig|6666666.157404.peg.402 (e-100)	fig|6666666.157415.peg.239 (e-100)
>AL111168 (orf7, cstIII, Cj1140)	no match < 1e-30	no match < 1e-30	no match < 1e-30	no match < 1e-30	no match < 1e-30	no match < 1e-30	fig|6666666.157402.peg.467 (3e-87)	fig|6666666.157403.peg.415 (3e-87)	fig|6666666.157406.peg.429 (e-163)	fig|6666666.157416.peg.1441 (3e-87)	fig|6666666.157401.peg.293 (0.0)	fig|6666666.157404.peg.402 (0.0)	fig|6666666.157415.peg.239 (1e-98)
>AF215659 (orf8 )	fig|6666666.157400.peg.11 ( 8e-67)	fig|6666666.157405.peg.1757 (9e-67)	fig|6666666.157418.peg.1769 (9e-67)	fig|6666666.157468.peg.857 (3e-66)	fig|6666666.157411.peg.227 (3e-66)	fig|6666666.157414.peg.240 (3e-66)	fig|6666666.157402.peg.468 (0.0)	fig|6666666.157403.peg.416 (0.0)	fig|6666666.157406.peg.430 (0.0)	fig|6666666.157416.peg.1442 (0.0)	fig|6666666.157401.peg.292 (0.0)	fig|6666666.157404.peg.403 (0.0)	fig|6666666.157415.peg.238 (0.0)
>AF215659 (orf9)	fig|6666666.157400.peg.12 (1e-52)	fig|6666666.157405.peg.1758 (1e-52)	fig|6666666.157418.peg.1770 (1e-52)	fig|6666666.157468.peg.858 (1e-53)	fig|6666666.157411.peg.228 (1e-53)	fig|6666666.157414.peg.241 (1e-53)	fig|6666666.157402.peg.469 (0.0)	fig|6666666.157403.peg.417 (0.0)	fig|6666666.157406.peg.431 (0.0)	fig|6666666.157416.peg.1443 0.0)	fig|6666666.157401.peg.291 (0.0)	fig|6666666.157404.peg.404 (0.0)	fig|6666666.157415.peg.237 (0.0)
>AF215659 (orf10)	no match < 1e-30	no match < 1e-30	fig|6666666.157418.peg.1773 (5e-30)	fig|6666666.157468.peg.861 (4e-29)	no match < 1e-30	no match < 1e-30	fig|6666666.157402.peg.472 (e-159)	fig|6666666.157403.peg.420 (e-159)	fig|6666666.157406.peg.434 (e-159)	fig|6666666.157416.peg.1446 (e-159)	fig|6666666.157401.peg.290 (e-107)	fig|6666666.157404.peg.405 (e-107)	fig|6666666.157415.peg.236 (e-107)
>AL111168 (orf5/10, cgtA, Cj1143)	fig|6666666.157400.peg.422 (3e-88)	fig|6666666.157405.peg.412 (3e-88)	fig|6666666.157418.peg.413 (3e-88)	no match < 1e-30	no match < 1e-30	no match < 1e-30	fig|6666666.157402.peg.472 (e-105)	fig|6666666.157403.peg.420 (e-105)	fig|6666666.157406.peg.434 (e-105)	fig|6666666.157416.peg.1446 (e-105)	fig|6666666.157401.peg.290 (0.0)	fig|6666666.157404.peg.405 (0.0)	fig|6666666.157415.peg.236 (0.0)
>AF215659 (orf11)	no match < 1e-30	no match < 1e-30	no match < 1e-30	no match < 1e-30	no match < 1e-30	no match < 1e-30	fig|6666666.157402.peg.474 (1e-83)	fig|6666666.157403.peg.421 (e-157)	fig|6666666.157406.peg.435 (e-157)	fig|6666666.157416.peg.1448 (9e-84)	no match < 1e-30	no match < 1e-30	no match < 1e-30
>AF215659 (orf12)	fig|6666666.157400.peg.426 (0.0)	fig|6666666.157405.peg.416 (0.0)	fig|6666666.157418.peg.417 (0.0)	fig|6666666.157468.peg.322 (0.0)	fig|6666666.157411.peg.587 (0.0)	fig|6666666.157414.peg.626 (0.0)	fig|6666666.157402.peg.475 (0.0)	fig|6666666.157403.peg.422 (0.0)	fig|6666666.157406.peg.436 (0.0)	fig|6666666.157416.peg.1449 (0.0)	fig|6666666.157401.peg.288 (e-178)	fig|6666666.157404.peg.407 (e-178)	fig|6666666.157415.peg.234 (e-178)
>AL111168 (orf13)	fig|6666666.157400.peg.431 (e-132)	fig|6666666.157405.peg.421 (e-132)	fig|6666666.157418.peg.422 (e-132)	fig|6666666.157468.peg.328 (e-134)	fig|6666666.157411.peg.581 (e-134)	fig|6666666.157414.peg.632 (e-134)	fig|6666666.157402.peg.480 (e-124)	fig|6666666.157403.peg.427 (e-124)	fig|6666666.157406.peg.441 (e-124)	fig|6666666.157416.peg.1454 (e-124)	fig|6666666.157401.peg.283 (e-124)	fig|6666666.157404.peg.412 (e-124)	fig|6666666.157415.peg.229 (e-124)
>AL111168 (orf14, Cj1137)	fig|6666666.157400.peg.424 (3e-85)	fig|6666666.157405.peg.414 (3e-85)	fig|6666666.157418.peg.415 (3e-85)	no match < 1e-30	no match < 1e-30	no match < 1e-30	no match < 1e-30	no match < 1e-30	no match < 1e-30	no match < 1e-30	fig|6666666.157401.peg.297 (0.0)	fig|6666666.157404.peg.398 (0.0)	fig|6666666.157415.peg.242 (0.0)
>AL111168 (orf15, Cj1138)	no match < 1e-30	no match < 1e-30	no match < 1e-30	fig|6666666.157468.peg.319 (8e-55)	fig|6666666.157411.peg.590 (7e-55)	fig|6666666.157414.peg.623 (e-55)	fig|6666666.157402.peg.464 (e-160)	fig|6666666.157403.peg.412 (e-160)	fig|6666666.157406.peg.426 (e-160)	fig|6666666.157416.peg.1438 (e-160)	fig|6666666.157401.peg.296 (0.0)	fig|6666666.157404.peg.399 (0.0)	fig|6666666.157415.peg.241 (0.0)
>AL111168 (orf16, Cj1143)	fig|6666666.157400.peg.12 (3e-54)	fig|6666666.157405.peg.1758 (3e-54)	fig|6666666.157418.peg.1770 (3e-54)	fig|6666666.157468.peg.858 (7e-53)	fig|6666666.157411.peg.228 (6e-53)	fig|6666666.157414.peg.241 (7e-53)	fig|6666666.157402.peg.469 (0.0)	fig|6666666.157403.peg.417 (0.0)	fig|6666666.157406.peg.431 (0.0)	fig|6666666.157416.peg.1443 (0.0)	fig|6666666.157401.peg.291 (0.0)	fig|6666666.157404.peg.404 (0.0)	fig|6666666.157415.peg.237 (0.0)
>af400669 (orf170	no match < 1e-30	no match < 1e-30	no match < 1e-30	no match < 1e-30	fig|6666666.157411.peg.228 (6e-53)	no match < 1e-30	no match < 1e-30	no match < 1e-30	no match < 1e-30	no match < 1e-30	no match < 1e-30	no match < 1e-30	no match < 1e-30
>af400669 (orf18)	fig|6666666.157400.peg.426 (6e-39)	fig|6666666.157405.peg.416 (6e-39)	fig|6666666.157418.peg.417 (6e-39)	fig|6666666.157468.peg.318 (0.0)	fig|6666666.157411.peg.591 (0.0)	fig|6666666.157414.peg.622 (0.0)	fig|6666666.157402.peg.466 (1e-71)	fig|6666666.157403.peg.414 (1e-71)	fig|6666666.157406.peg.428 (1e-71)	fig|6666666.157416.peg.1440 (9e-72)	fig|6666666.157401.peg.294 (3e-50)	fig|6666666.157404.peg.401 (3e-50)	fig|6666666.157415.peg.240 (4e-53)
>af400669 (orf19)	no match < 1e-30	no match < 1e-30	no match < 1e-30	fig|6666666.157468.peg.319 (0.0)	fig|6666666.157411.peg.590 (0.0)	fig|6666666.157414.peg.623 (0.0)	fig|6666666.157402.peg.464 (9e-49)	fig|6666666.157403.peg.412 (9e-49)	fig|6666666.157406.peg.426 (9e-49)	fig|6666666.157416.peg.1438 (8e-49)	fig|6666666.157401.peg.296 (4e-54)	fig|6666666.157404.peg.399 (4e-54)	fig|6666666.157415.peg.241 (4e-54)
>af400669 (orf20)	fig|6666666.157400.peg.426 (5e-41)	fig|6666666.157405.peg.416 ( 5e-41)	fig|6666666.157418.peg.417 (5e-41)	fig|6666666.157468.peg.320(0.0)	fig|6666666.157411.peg.589 (0.0)	fig|6666666.157414.peg.624 (0.0)	fig|6666666.157402.peg.466 (3e-82)	fig|6666666.157403.peg.414 (3e-82)	fig|6666666.157406.peg.428 (3e-82)	fig|6666666.157416.peg.1440 (3e-82)	fig|6666666.157401.peg.294 (6e-61)	fig|6666666.157404.peg.401 (5e-61)	fig|6666666.157415.peg.240 (6e-71)
>af343914 (orf21)	fig|6666666.157400.peg.427 (0.0)	fig|6666666.157405.peg.417 (0.0)	fig|6666666.157418.peg.418 (0.0)	fig|6666666.157468.peg.323 (0.0)	fig|6666666.157411.peg.586 (0.0)	fig|6666666.157414.peg.627 (0.0)	fig|6666666.157402.peg.476 (0.0)	fig|6666666.157403.peg.423 (0.0)	fig|6666666.157406.peg.437 (0.0)	fig|6666666.157416.peg.1450 (0.0)	fig|6666666.157401.peg.287 (0.0)	fig|6666666.157404.peg.408 (0.0)	fig|6666666.157415.peg.233 (0.0)
>af343914 (orf22)	fig|6666666.157400.peg.426 (0.0)	fig|6666666.157405.peg.416 (0.0)	fig|6666666.157418.peg.417 (0.0)	fig|6666666.157468.peg.322 (0.0 )	fig|6666666.157411.peg.587 (0.0)	fig|6666666.157414.peg.626 (0.0)	fig|6666666.157402.peg.475 (0.0)	fig|6666666.157403.peg.422 (0.0)	fig|6666666.157406.peg.436 (0.0)	fig|6666666.157416.peg.1449 (0.0)	fig|6666666.157401.peg.288 (e-177)	fig|6666666.157404.peg.407 (e-177)	fig|6666666.157415.peg.234 (e-177)
>af343914 (orf23)	fig|6666666.157400.peg.425 (0.0)	fig|6666666.157405.peg.415 (0.0)	fig|6666666.157418.peg.416 (0.0)	fig|6666666.157468.peg.322 (0.0)	no match < 1e-30	no match < 1e-30	no match < 1e-30	no match < 1e-30	no match < 1e-30	no match < 1e-30	no match < 1e-30	no match < 1e-30	no match < 1e-30
>af343914 (orf24)	fig|6666666.157400.peg.424 (0.0)	fig|6666666.157405.peg.414 (0.0)	fig|6666666.157418.peg.415 (0.0)	no match < 1e-30	no match < 1e-30	no match < 1e-30	no match < 1e-30	no match < 1e-30	no match < 1e-30	no match < 1e-30	fig|6666666.157401.peg.297 (3e-85)	fig|6666666.157404.peg.398 (3e-85)	fig|6666666.157415.peg.242 (3e-85)
>af343914 (orf25)	fig|6666666.157400.peg.423 (0.0)	fig|6666666.157405.peg.413 (0.0)	fig|6666666.157418.peg.414 (0.0)	no match < 1e-30	no match < 1e-30	no match < 1e-30	no match < 1e-30	no match < 1e-30	no match < 1e-30	no match < 1e-30	no match < 1e-30	no match < 1e-30	no match < 1e-30
>af343914 (orf26)	fig|6666666.157400.peg.422 (0.0)	fig|6666666.157405.peg.412 (0.0)	fig|6666666.157418.peg.413 (0.0)	no match < 1e-30	no match < 1e-30	no match < 1e-30	fig|6666666.157402.peg.465 (e-109)	fig|6666666.157403.peg.413 (e-109)	fig|6666666.157406.peg.427 (e-109)	fig|6666666.157416.peg.1439 (e-109)	fig|6666666.157401.peg.290 (2e-87)	fig|6666666.157404.peg.405 (2e-87)	fig|6666666.157415.peg.236 (2e-87)
>af343914 (orf27)	fig|6666666.157400.peg.421 (0.0)	fig|6666666.157405.peg.411 (0.0)	fig|6666666.157418.peg.412 (0.0)	no match < 1e-30	no match < 1e-30	no match < 1e-30	no match < 1e-30	no match < 1e-30	no match < 1e-30	no match < 1e-30	fig|6666666.157401.peg.1103 (4e-32)	fig|6666666.157404.peg.1052 (4e-32)	fig|6666666.157415.peg.1638 (2e-33)
>af343914 (orf28)	fig|6666666.157400.peg.420 (0.0)	fig|6666666.157405.peg.410 (0.0)	fig|6666666.157418.peg.411 (0.0)	fig|6666666.157468.peg.717 (3e-78)	fig|6666666.157411.peg.992 (3e-78)	fig|6666666.157414.peg.1006 (3e-78)	fig|6666666.157402.peg.774 (2e-77)	fig|6666666.157403.peg.721 (2e-77)	fig|6666666.157406.peg.970 (2e-77)	fig|6666666.157416.peg.1000 (2e-77)	fig|6666666.157401.peg.923 (4e-78)	fig|6666666.157404.peg.888 (3e-78)	fig|6666666.157415.peg.861 (1e-76)
>af343914 (orf29)	no match < 1e-30	no match < 1e-30	no match < 1e-30	no match < 1e-30	no match < 1e-30	no match < 1e-30	no match < 1e-30	no match < 1e-30	no match < 1e-30	no match < 1e-30	no match < 1e-30	no match < 1e-30	no match < 1e-30
>af343914 (orf30)	fig|6666666.157400.peg.419 (0.0)	fig|6666666.157405.peg.409 (0.0)	fig|6666666.157418.peg.410 (0.0)	no match < 1e-30	no match < 1e-30	no match < 1e-30	no match < 1e-30	no match < 1e-30	no match < 1e-30	no match < 1e-30	no match < 1e-30	no match < 1e-30	no match < 1e-30
>af343914 (orf31)	no match < 1e-30	no match < 1e-30	no match < 1e-30	no match < 1e-30	no match < 1e-30	no match < 1e-30	no match < 1e-30	no match < 1e-30	no match < 1e-30	no match < 1e-30	no match < 1e-30	no match < 1e-30	no match < 1e-30
>af343914 (orf32)	fig|6666666.157400.peg.417 (e-103)	fig|6666666.157405.peg.407 (e-103)	fig|6666666.157418.peg.408 (e-103)	no match < 1e-30	no match < 1e-30	no match < 1e-30	no match < 1e-30	no match < 1e-30	no match < 1e-30	no match < 1e-30	no match < 1e-30	no match < 1e-30	no match < 1e-30
>af343914 (orf33)	fig|6666666.157400.peg.416 (4e-89)	fig|6666666.157405.peg.406 (4e-89)	fig|6666666.157418.peg.407 ( 4e-89)	no match < 1e-30	no match < 1e-30	no match < 1e-30	no match < 1e-30	no match < 1e-30	fig|6666666.157406.peg.1466 (7e-90)	no match < 1e-30	no match < 1e-30	no match < 1e-30	no match < 1e-30
>af343914 (orf34)	))fig|6666666.157400.peg.415 (5e-93	fig|6666666.157405.peg.405 (3e-88)	fig|6666666.157418.peg.406 (3e-88)	no match < 1e-30	no match < 1e-30	no match < 1e-30	no match < 1e-30	no match < 1e-30	fig|6666666.157406.peg.1466 (5e-33)	no match < 1e-30	no match < 1e-30	no match < 1e-30	no match < 1e-30
>AY436358 (orf35)	fig|6666666.157400.peg.406 (1e-50)	fig|6666666.157405.peg.396 (1e-50)	fig|6666666.157418.peg.397 (1e-50)	fig|6666666.157468.peg.311 (4e-50)	fig|6666666.157411.peg.598 (4e-50)	fig|6666666.157414.peg.615 (4e-50)	fig|6666666.157402.peg.457 (1e-50)	fig|6666666.157403.peg.405 (1e-50)	fig|6666666.157406.peg.419 (1e-50)	fig|6666666.157416.peg.599 (1e-50)	fig|6666666.157401.peg.305 (2e-50)	no match < 1e-30	fig|6666666.157415.peg.250 (1e-50)
>AY436358 (orf36)	fig|6666666.157400.peg.426 (1e-50)	fig|6666666.157405.peg.416 (1e-50)	fig|6666666.157418.peg.417 (1e-50)	fig|6666666.157468.peg.320 (2e-78)	fig|6666666.157411.peg.589 (2e-78)	fig|6666666.157414.peg.624 (2e-78)	fig|6666666.157402.peg.466 (2e-74)	fig|6666666.157403.peg.414 (2e-74)	fig|6666666.157406.peg.428 (2e-74)	fig|6666666.157416.peg.1440 (2e-74)	fig|6666666.157401.peg.294 (2e-58)	fig|6666666.157404.peg.401 (2e-58)	fig|6666666.157415.peg.240 (9e-67)
>AY436358 (orf37)	fig|6666666.157400.peg.1390 (1e-58)	fig|6666666.157405.peg.1605 (1e-58)	fig|6666666.157418.peg.1618 (1e-58)	no match < 1e-30	no match < 1e-30	no match < 1e-30	no match < 1e-30	no match < 1e-30	no match < 1e-30	no match < 1e-30	no match < 1e-30	no match < 1e-30	no match < 1e-30
>AY436358 (orf38)	fig|6666666.157400.peg.427 ( e-152)	fig|6666666.157405.peg.417 (e-152)	fig|6666666.157418.peg.418 (e-152)	fig|6666666.157468.peg.323 (e-151)	fig|6666666.157411.peg.586 (e-151)	fig|6666666.157414.peg.627 (e-151)	fig|6666666.157402.peg.476 (e-152)	fig|6666666.157403.peg.423 (e-152)	fig|6666666.157406.peg.437 (e-152)	fig|6666666.157416.peg.1450 (e-152)	fig|6666666.157401.peg.287 (e-137)	fig|6666666.157404.peg.408 (e-137)	fig|6666666.157415.peg.233 (e-137)
>AY800272 (orf39)	fig|6666666.157400.peg.418 (e-125)	fig|6666666.157405.peg.408 ( e-125)	fig|6666666.157418.peg.409 (e-125)	no match < 1e-30	no match < 1e-30	no match < 1e-30	no match < 1e-30	no match < 1e-30	no match < 1e-30	no match < 1e-30	no match < 1e-30	no match < 1e-30	no match < 1e-30
>EU404107 (orf40)	no match < 1e-30	no match < 1e-30	no match < 1e-30	no match < 1e-30	no match < 1e-30	no match < 1e-30	no match < 1e-30	no match < 1e-30	no match < 1e-30	no match < 1e-30	fig|6666666.157401.peg.1115 (7e-83)	fig|6666666.157404.peg.1064 (7e-83)	fig|6666666.157415.peg.1318 (7e-84)
>EU404107 (orf41)	no match < 1e-30	no match < 1e-30	no match < 1e-30	no match < 1e-30	no match < 1e-30	no match < 1e-30	no match < 1e-30	no match < 1e-30	no match < 1e-30	no match < 1e-30	fig|6666666.157401.peg.1115 ()	fig|6666666.157404.peg.1064 (2e-39)	fig|6666666.157415.peg.1318 (9e-37)
>EU404107 (orf42)	no match < 1e-30	no match < 1e-30	no match < 1e-30	no match < 1e-30	no match < 1e-30	no match < 1e-30	no match < 1e-30	no match < 1e-30	no match < 1e-30	no match < 1e-30	fig|6666666.157401.peg.1121 (4e-48)	fig|6666666.157404.peg.1070 (4e-48)	fig|6666666.157415.peg.1323 (4e-48)
>EU404107 (orf43)	fig|6666666.157400.peg.408 (3e-96)	fig|6666666.157405.peg.398 (3e-96)	fig|6666666.157418.peg.399 (3e-96)	fig|6666666.157468.peg.313 (1e-96)	fig|6666666.157411.peg.596 (e-96)	fig|6666666.157414.peg.617 (1e-96)	fig|6666666.157402.peg.459 (3e-96)	fig|6666666.157403.peg.407 (3e-96)	fig|6666666.157406.peg.1045 (0.0)	fig|6666666.157416.peg.601 (3e-96)	fig|6666666.157401.peg.303 (3e-96)	fig|6666666.157404.peg.392 (3e-96)	fig|6666666.157415.peg.248 (2e-96)
>EU404107 (orf44)	no match < 1e-30	no match < 1e-30	no match < 1e-30	fig|6666666.157468.peg.955 (8e-53)	fig|6666666.157411.peg.325 (7e-53)	fig|6666666.157414.peg.337 (7e-53)	no match < 1e-30	no match < 1e-30	no match < 1e-30	no match < 1e-30	fig|6666666.157401.peg.1123 (3e-46)	fig|6666666.157404.peg.1072 (3e-46)	fig|6666666.157415.peg.1325 (3e-46)
>EU404112 (orf46)	no match < 1e-30	no match < 1e-30	no match < 1e-30	no match < 1e-30	no match	no match < 1e-30	no match < 1e-30	no match < 1e-30	no match < 1e-30	no match < 1e-30	no match < 1e-30	no match < 1e-30	no match < 1e-30
>EU404111 (orf47)	no match < 1e-30	no match < 1e-30	no match < 1e-30	fig|6666666.157468.peg.319 (0.0)	fig|6666666.157411.peg.590 (0.0)	fig|6666666.157414.peg.623 (0.0)	fig|6666666.157402.peg.464 (1e-44)	fig|6666666.157403.peg.412 (1e-44)	fig|6666666.157406.peg.426 (1e-44)	fig|6666666.157416.peg.1438 (1e-44)	fig|6666666.157401.peg.1122 (7e-52)	fig|6666666.157404.peg.1071 (6e-52)	fig|6666666.157415.peg.1324 (6e-52)
>EU404111 (orf48)	no match < 1e-30	no match < 1e-30	no match < 1e-30	fig|6666666.157468.peg.321 ( 2e-74)	fig|6666666.157411.peg.588 (2e-74)	fig|6666666.157414.peg.625 (2e-74)	fig|6666666.157402.peg.464 (e-104)	fig|6666666.157403.peg.412 (e-104)	fig|6666666.157406.peg.426 (e-104)	fig|6666666.157416.peg.1438 (e-104)	fig|6666666.157401.peg.1122 (e-130)	fig|6666666.157404.peg.1071 ()	fig|6666666.157415.peg.1324 (e-130)
>EF143353 (orf49)	fig|6666666.157400.peg.35 (5e-31)	no match < 1e-30	fig|6666666.157418.peg.23 (5e-31)	no match < 1e-30	no match < 1e-30	no match < 1e-30	no match < 1e-30	no match < 1e-30	no match < 1e-30	no match < 1e-30	no match < 1e-30	fig|6666666.157404.peg.1061 (4e-28)	no match < 1e-30
>EF143353 (orf50)	fig|6666666.157400.peg.421 (e-144)	fig|6666666.157405.peg.411 ( e-144)	fig|6666666.157418.peg.412 (e-144)	no match < 1e-30	no match < 1e-30	no match < 1e-30	no match < 1e-30	no match < 1e-30	no match < 1e-30	no match < 1e-30	no match < 1e-30	no match < 1e-30	fig|6666666.157415.peg.53 (8e-32)
>EF140720 (orf51/19)	fig|6666666.157400.peg.421 (e-144)	no match < 1e-30	no match < 1e-30	fig|6666666.157468.peg.319 (e-145)	fig|6666666.157411.peg.590 (e-145)	fig|6666666.157414.peg.623 (e-145)	fig|6666666.157402.peg.464 (1e-46)	fig|6666666.157403.peg.412 (1e-46)	fig|6666666.157406.peg.426 (1e-46)	fig|6666666.157416.peg.1438 (9e-47)	fig|6666666.157401.peg.296 (1e-51)	fig|6666666.157404.peg.399 (1e-51)	fig|6666666.157415.peg.241 (1e-51)
