# Supplementary material for: Zoonotic Transmission of Campylobacter jejuni to Caretakers From Sick Pen Calves Carrying a Mixed Population of Strains With and Without Guillain Barré Syndrome-Associated Lipooligosaccharide Loci
Source: Front Microbiol. 2022 Apr 29;13:800269. doi: 10.3389/fmicb.2022.800269 (PMC9112162; doi:10.3389/fmicb.2022.800269)
Supplement: Supplementary Table 3 — Protein percent identity of virulence-associated calf isolate open reading frames. Clinical C. jejuni isolates 260.94, HB93-13, CF93-6, 84-25, 81-176, and 11168 are included. This table contains homologs in each isolate to 342 virulence-associated C. jejuni loci detailed in Bell et al. (2013) and updated from the literature (Jacobs et al., 2008; Baek et al., 2011; Buelow et al., 2011; Barrero-Tobon and Hendrixson, 2012; Boehm et al., 2012; Cullen et al., 2012, 2013; Frirdich et al., 2012). Homologs were identified by conducting TBLASTN of reference sequences to the genome of each isolate. The reference sequences from GenBank that were employed for this analysis are given in column 1; sequence names of the form Cj####.gene_name are from C. jejuni NCTC 11168 genome sequence AL111168. [file Table_3.XLSX]

## Sheet: Sheet 1
PERCENT IDENTITY
Species		C. jejuni calf isolates													C. jejuni subsp. jejuni							C. jejuni subsp. doylei	C. coli
Strain		LM01	LM19	LM21	LM03	LM12	TW	LM08	LM10	LM13	LM26	LM05	LM11	LM24	11168	81-176	260.94	84-25	CF93-6	HB9313	RM1221	269.97	RM2228
	RAST accesssion number	157468	157411	157414	157400	157405	157418	157402	157403	157406	157416	157401	157404	157415	192222	354243	360108	360110	360111	360112	195099	360109	306254
		ST929			ST922			ST806				ST6227		ST982
A. FUNCTION UNAMBIGOUSLY IDENTIFIED (1270)	LM01 peg number from RAST
cag pathogenicity island protein (cag12)	fig|6666666.157468.peg.9	100	100	100	100	100	100	100	100	0	100	100	100	100	0	100	0	0	0	89.15	0	0	94.64
DNA topoisomerase III (EC 5.99.1.2)	fig|6666666.157468.peg.13	100	91.52	91.52	91.78	91.78	91.78	99.7	99.7	26.32	99.7	90.82	90.82	99.7	26.32	91.1	26.74	26.32	26.32	90.14	26.32	26.95	84.21
DNA topoisomerase III (EC 5.99.1.2)	fig|6666666.157468.peg.15	100	100	100	100	100	100	100	100	0	100	100	100	100	0	100	0	0	0	100	0	0	98.84
TolA protein	fig|6666666.157468.peg.18	100	97.92	100	100	100	100	97.92	97.92	0	97.92	0	0	97.92	0	94.74	0	0	0	0	0	0	96.9
replication protein	fig|6666666.157468.peg.23	100	100	100	99.6	99.6	99.6	100	100	0	100	99.2	99.2	100	0	99.6	0	0	0	0	0	0	89.19
helicase, Snf2 family	fig|6666666.157468.peg.31	100	98.76	98.76	98.45	98.45	98.45	99.9	99.9	0	0	98.34	98.34	99.9	0	99.95	0	0	0	99.72	0	0	93.28
Ribbon-helix-helix protein, copG family domain protein	fig|6666666.157468.peg.34	100	100	100	100	100	100	100	100	0	100	99.45	99.45	100	0	100	0	0	0	100	0	0	94.95
DNA primase (EC 2.7.7.-)	fig|6666666.157468.peg.38	100	87.62	87.62	99.75	99.75	99.75	98.28	98.28	55.09	98.28	99.51	99.51	98.28	0	99.51	0	0	0	95.1	0	0	83.54
Motility accessory factor	fig|6666666.157468.peg.40	100	0	0	0	0	0	0	0	0	0	0	0	0	0	0	0	0	0	0	0	0	92.22
cell filamentation-like protein	fig|6666666.157468.peg.43	100	0	99.38	0	0	0	99.56	99.56	99.56	99.56	99.56	99.56	100	0	0	0	0	0	0	0	0	75.18
DNA primase (EC 2.7.7.-)	fig|6666666.157468.peg.47	100	97.58	99.58	54.83	54.83	54.83	100	100	100	100	100	100	100	0	54.83	0	0	0	56.14	0	0	96
Single-stranded DNA-binding protein	fig|6666666.157468.peg.49	100	30.1	30.1	30.1	30.1	30.1	100	100	100	100	100	100	100	30.1	30.1	30.1	30.1	30.1	30.1	30.1	30.1	95.14
Capsular polysaccharide biosynthesis heptosyltransferase HddD	fig|6666666.157468.peg.80	100	0	0	40.62	40.62	40.62	0	0	0	0	0	0	0	0	0	40	0	0	0	0	29.9	90.91
Motility accessory factor	fig|6666666.157468.peg.81	100	55.91	55.91	96.94	96.94	96.94	94.9	41.59	94.9	94.9	96.94	96.94	95.92	96.94	65.96	73.4	96.94	96.94	65.96	43.75	77.23	100
Erythrocyte membrane-associated antigen	fig|6666666.157468.peg.82	100	100	100	0	0	0	0	0	0	0	0	0	0	0	0	0	0	0	0	96.05	98.68	99.22
Bll0063 protein	fig|6666666.157468.peg.87	100	100	100	0	0	0	0	0	0	0	0	0	0	0	0	0	0	0	0	0	0	94.42
DNA primase (EC 2.7.7.-)	fig|6666666.157468.peg.88	100	100	100	24.86	24.86	24.86	24.86	24.86	24.86	24.86	24.86	24.86	24.86	24.86	24.86	24.86	24.86	24.86	24.57	24.86	96.13	100
Thymidine kinase (EC 2.7.1.21)	fig|6666666.157468.peg.99	100	100	100	0	0	0	0	0	0	0	0	0	0	0	0	0	0	0	0	0	96.32	99.44
Single-stranded DNA-binding protein	fig|6666666.157468.peg.114	100	100	100	43.81	43.81	43.81	42.86	41.82	42.86	42.86	43.81	43.81	42.86	43.81	42.86	42.86	42.86	43.81	42.86	42.73	81.58	98.08
Methyl-accepting chemotaxis signal transduction protein	fig|6666666.157468.peg.117	100	0	0	0	0	0	0	0	86.05	0	0	0	0	0	39.66	0	39.66	0	0	36.67	94.83	93.06
Virulence-associated protein 2	fig|6666666.157468.peg.122	100	100	100	100	100	100	100	100	0	100	100	100	100	0	100	0	0	0	84.44	0	0	98.92
Single-stranded DNA-binding protein	fig|6666666.157468.peg.130	100	97.16	97.16	100	100	100	100	100	97.96	100	100	100	100	30.48	100	30.48	30.48	30.48	97.16	29.2	30.48	90.61
Tgh088	fig|6666666.157468.peg.134	100	100	100	0	0	0	0	0	0	0	0	0	0	0	0	0	0	0	0	0	0	95.45
Glycerate kinase (EC 2.7.1.31)	fig|6666666.157468.peg.137	100	100	100	0	0	0	0	0	0	0	0	0	0	0	0	0	0	0	0	98.77	0	100
Glycerate kinase (EC 2.7.1.31)	fig|6666666.157468.peg.139	100	100	100	0	0	0	0	0	0	0	0	0	0	0	0	0	0	0	0	75.17	0	97.09
Erythrocyte membrane-associated antigen	fig|6666666.157468.peg.160	100	100	100	0	0	0	0	0	0	0	0	0	0	0	0	0	0	0	0	100	94.74	98.92
Replication initiator protein	fig|6666666.157468.peg.164	100	100	100	100	100	100	100	100	100	100	100	100	100	0	0	0	0	0	0	0	0	97.85
VgrG protein	fig|6666666.157468.peg.169	100	100	100	0	0	0	0	0	0	0	0	0	0	0	0	0	0	0	0	98.93	0	100
VgrG protein	fig|6666666.157468.peg.170	100	100	100	0	0	0	0	33.04	0	0	0	0	0	0	0	0	0	0	0	40.32	0	95.08
VgrG protein	fig|6666666.157468.peg.178	100	100	100	0	0	0	0	0	0	0	0	0	0	0	0	0	0	0	0	73.75	0	98.8
VgrG protein	fig|6666666.157468.peg.186	100	100	100	0	0	0	0	99.12	0	0	0	0	0	0	0	0	0	0	0	94.17	0	100
Arginine/ornithine antiporter ArcD	fig|6666666.157468.peg.193	100	100	100	100	100	100	99.35	99.35	99.35	99.35	97.4	97.4	97.32	97.32	99.35	99.35	97.32	97.32	99.35	97.4	97.4	100
Branched-chain amino acid transport ATP-binding protein LivF (TC 3.A.1.4.1)	fig|6666666.157468.peg.195	100	100	100	100	100	100	100	100	100	100	100	100	100	100	99.57	100	100	100	99.57	100	99.13	97.24
Branched-chain amino acid transport ATP-binding protein LivG (TC 3.A.1.4.1)	fig|6666666.157468.peg.196	100	100	100	99.22	99.22	99.22	99.61	99.61	99.61	99.61	99.61	99.61	99.61	99.61	99.22	100	99.61	99.61	100	99.61	99.22	98.36
Branched-chain amino acid transport system permease protein LivM (TC 3.A.1.4.1)	fig|6666666.157468.peg.197	100	100	100	99.71	99.71	99.71	99.71	99.71	99.71	97.56	99.71	99.71	99.71	99.71	98.57	99.43	99.71	99.71	99.14	98.86	98.57	95.51
High-affinity branched-chain amino acid transport system permease protein LivH (TC 3.A.1.4.1)	fig|6666666.157468.peg.198	100	100	100	99.66	99.66	99.66	99.66	99.66	99.66	99.66	99.66	99.66	99.66	99.66	99.33	99.66	99.66	99.66	99.66	99.66	97.99	97.6
High-affinity leucine-specific transport system, periplasmic binding protein LivK (TC 3.A.1.4.1)	fig|6666666.157468.peg.199	100	100	100	99.73	99.73	99.73	100	100	100	98.92	100	100	100	100	99.73	99.73	100	100	100	99.73	99.19	100
Branched-chain amino acid ABC transporter, amino acid-binding protein (TC 3.A.1.4.1)	fig|6666666.157468.peg.200	100	100	100	99.46	99.46	99.46	99.19	99.19	99.19	99.19	99.46	99.46	99.19	99.19	99.19	99.19	99.19	99.46	99.19	98.65	97.84	93.33
Arginine/ornithine antiporter ArcD	fig|6666666.157468.peg.203	100	100	100	100	100	100	100	100	100	100	100	100	100	100	100	100	100	100	100	100	100	97.44
Aspartate-semialdehyde dehydrogenase (EC 1.2.1.11)	fig|6666666.157468.peg.204	100	100	100	98.54	98.54	98.54	98.54	98.54	98.54	98.54	99.71	99.71	99.42	99.42	98.83	98.54	99.42	99.42	98.83	100	98.25	100
Signal-transduction regulatory protein FlgR	fig|6666666.157468.peg.205	100	100	100	99.31	99.31	99.31	99.08	99.08	99.08	99.08	99.08	99.08	99.31	99.31	98.85	99.31	99.31	99.31	98.85	99.77	99.54	100
DNA gyrase subunit A (EC 5.99.1.3)	fig|6666666.157468.peg.208	100	100	100	99.65	99.65	99.65	99.54	99.54	99.54	100	99.77	99.77	99.65	99.65	99.88	99.54	99.65	99.54	99.54	99.88	98.84	95.95
Outer membrane liproprotein mapA precursor	fig|6666666.157468.peg.210	100	100	100	99.07	99.07	99.07	99.07	99.07	99.07	99.07	100	100	100	100	99.53	100	100	100	100	100	98.6	99.12
Translation elongation factor LepA	fig|6666666.157468.peg.211	100	100	100	99.33	99.33	99.33	99.67	99.67	99.67	99.46	100	100	99.83	99.83	99.83	99.67	99.83	99.83	99.5	100	99.16	98.57
Membrane fusion protein of RND family multidrug efflux pump	fig|6666666.157468.peg.213	100	100	100	97.97	97.97	97.97	99.19	99.19	99.19	99.19	99.59	99.59	99.19	99.19	99.19	99.19	99.19	99.59	99.19	99.59	97.15	92.67
Acriflavin resistance protein / Multidrug efflux system CmeDEF	fig|6666666.157468.peg.214	100	100	100	99.29	99.29	99.29	99.4	99.4	99.4	99.4	99.5	99.5	99.4	99.5	99.5	99.8	99.5	99.8	99.4	99.5	97.88	92.62
Arginine-tRNA-protein transferase (EC 2.3.2.8)	fig|6666666.157468.peg.216	100	100	100	100	100	100	100	100	100	100	100	100	100	100	99.58	100	100	99.58	100	99.58	97.07	98.81
Pyruvate carboxylase subunit A (EC 6.4.1.1)	fig|6666666.157468.peg.218	100	100	100	100	100	100	100	100	100	100	100	100	100	100	100	99.79	100	99.79	100	100	98.54	98.92
Cell division protein FtsW	fig|6666666.157468.peg.219	100	100	100	100	100	100	99.74	99.74	99.74	99.74	100	100	99.48	99.48	99.74	100	99.48	99.48	99.74	99.74	99.48	99.15
UDP-N-acetylglucosamine--N-acetylmuramyl-(pentapeptide) pyrophosphoryl-undecaprenol N-acetylglucosamine transferase (EC 2.4.1.227)	fig|6666666.157468.peg.220	100	100	100	100	100	100	99.71	99.71	99.71	99.71	99.71	99.71	99.71	100	100	99.71	99.71	99.71	100	99.71	92.98	95.45
Transcriptional regulator, AraC family	fig|6666666.157468.peg.223	100	100	100	100	100	100	100	100	100	100	98.31	98.31	100	100	100	100	100	100	100	100	0	94.22
Thiamin-phosphate pyrophosphorylase (EC 2.5.1.3)	fig|6666666.157468.peg.224	100	100	100	99.5	99.5	99.5	99.5	99.5	99.5	99.5	99.5	99.5	99.5	99.5	99.5	99	99.5	99.5	99.5	99.5	94.5	99.75
2-iminoacetate synthase (ThiH) (EC 4.1.99.19)	fig|6666666.157468.peg.225	100	100	100	98.95	98.95	98.95	98.69	98.69	98.69	98.69	98.69	98.69	98.69	98.69	98.43	98.69	98.69	98.69	98.43	98.95	97.38	90.17
Thiazole biosynthesis protein ThiG	fig|6666666.157468.peg.226	100	100	100	98.06	98.06	98.06	98.06	98.06	98.06	98.06	98.06	98.06	98.06	97.67	99.22	98.06	98.06	96.62	99.22	97.67	96.9	89.73
Sulfur carrier protein adenylyltransferase ThiF	fig|6666666.157468.peg.227	100	100	100	98.87	98.87	98.87	98.87	98.87	98.87	98.87	100	100	98.87	98.87	99.62	98.5	98.87	99.25	99.62	97.74	97.37	66.92
Sulfur carrier protein ThiS	fig|6666666.157468.peg.228	100	100	100	96.83	96.83	96.83	96.83	96.83	96.83	96.83	100	100	96.83	96.83	100	100	96.83	100	100	96.83	96.83	94.63
DNA methylase-type I restriction-modification system	fig|6666666.157468.peg.229	100	100	100	0	0	0	28.48	28.48	28.48	28.48	28.48	28.48	28.48	28.48	28.48	0	28.48	46.98	23.9	29.53	51.49	96.31
Type I restriction-modification enzyme M subunit	fig|6666666.157468.peg.232	100	100	100	25	25	25	24.57	24.57	100	0	24.57	24.57	24.57	24.57	0	25	24.57	98.54	23.33	24.57	97.09	95.84
N-succinyl-L,L-diaminopimelate desuccinylase (EC 3.5.1.18)	fig|6666666.157468.peg.233	100	100	100	99.73	99.73	99.73	98.63	98.63	98.63	98.63	98.9	98.9	98.63	98.63	98.08	98.63	98.63	98.08	98.36	99.18	98.08	0
Arginine/ornithine antiporter ArcD	fig|6666666.157468.peg.234	100	100	100	98.49	98.49	98.49	98.99	98.99	98.99	98.99	97.99	97.99	98.99	98.99	97.99	98.99	98.99	98.49	98.49	98.49	97.99	97.81
NAD-dependent protein deacetylase of SIR2 family	fig|6666666.157468.peg.235	100	100	100	96.57	96.57	96.57	97.42	97.42	97.42	97.42	100	100	97.42	100	97	97.42	97.42	97.42	97	97	67.81	57.92
Recombination inhibitory protein MutS2	fig|6666666.157468.peg.237	100	100	100	97.28	97.28	97.28	98.5	98.5	98.5	98.5	99.18	99.18	98.78	98.91	97.28	98.91	98.5	98.5	98.91	98.64	96.46	98.97
membrane protein	fig|6666666.157468.peg.238	100	100	100	99.14	99.14	99.14	98.28	98.28	98.28	96.91	99.14	99.14	100	99.14	99.14	99.14	98.28	100	100	100	98.28	98.31
UDP-N-acetylmuramate--alanine ligase (EC 6.3.2.8)	fig|6666666.157468.peg.239	100	100	100	96.98	96.98	96.98	97.45	97.45	97.45	97.45	96.98	96.98	96.98	96.29	96.52	96.29	97.45	98.61	97.68	97.22	95.82	98.26
Exodeoxyribonuclease VII small subunit (EC 3.1.11.6)	fig|6666666.157468.peg.241	100	100	100	100	100	100	100	100	100	100	100	100	100	100	100	100	100	100	100	100	100	86.08
Inosine-5'-monophosphate dehydrogenase (EC 1.1.1.205) / CBS domain	fig|6666666.157468.peg.242	100	100	100	100	100	100	100	100	100	100	100	100	100	99.79	99.79	99.79	100	99.79	100	99.38	99.18	97.45
Aspartyl-tRNA(Asn) amidotransferase subunit A (EC 6.3.5.6) @ Glutamyl-tRNA(Gln) amidotransferase subunit A (EC 6.3.5.7)	fig|6666666.157468.peg.243	100	100	100	99.78	99.78	99.78	99.78	99.78	99.78	99.78	99.78	99.78	99.78	98.68	98.68	98.68	99.78	99.56	99.78	99.12	98.01	97.4
Isoleucyl-tRNA synthetase (EC 6.1.1.5)	fig|6666666.157468.peg.244	100	100	100	99.02	99.02	99.02	99.02	99.02	99.02	99.02	99.02	99.02	99.02	98.69	98.58	98.8	99.02	99.24	99.02	99.13	97.16	100
Oxygen-insensitive NAD(P)H nitroreductase (EC 1.-.-.-) / Dihydropteridine reductase (EC 1.5.1.34)	fig|6666666.157468.peg.247	100	100	100	99.51	99.51	99.51	99.51	99.51	99.51	99.51	99.51	99.51	99.51	35.18	99.03	99.03	99.51	100	99.51	35.68	97.32	90.41
Oxygen-insensitive NAD(P)H nitroreductase (EC 1.-.-.-) / Dihydropteridine reductase (EC 1.5.1.34)	fig|6666666.157468.peg.248	100	100	100	96.52	96.52	96.52	97.01	97.01	97.01	97.01	97.01	97.01	97.01	97.01	97.01	97.01	97.01	97.01	97.01	99.5	97.51	98.28
CDP-diacylglycerol--glycerol-3-phosphate 3-phosphatidyltransferase (EC 2.7.8.5)	fig|6666666.157468.peg.249	100	100	100	98.88	98.88	98.88	99.44	99.44	99.44	99.44	99.44	99.44	99.44	98.88	98.88	98.88	99.44	99.44	98.88	99.44	97.19	95.83
Membrane-associated zinc metalloprotease	fig|6666666.157468.peg.250	100	100	100	100	100	100	97.28	97.28	97.28	97.28	99.73	99.73	97.28	99.46	96.2	96.2	97.28	99.73	96.2	100	94.65	100
SSU ribosomal protein S6p	fig|6666666.157468.peg.252	100	100	100	99.2	99.2	99.2	98.4	98.4	98.4	98.4	99.2	99.2	98.4	99.2	99.2	99.2	98.4	100	99.2	100	99.2	93.51
Single-stranded DNA-binding protein	fig|6666666.157468.peg.253	100	100	100	97.81	97.81	97.81	97.81	97.81	97.81	97.81	97.81	97.81	97.81	97.81	98.9	98.9	97.81	98.36	97.81	99.45	96.17	96.55
SSU ribosomal protein S18p @ SSU ribosomal protein S18p, zinc-independent	fig|6666666.157468.peg.254	100	100	100	100	100	100	100	100	100	100	100	100	100	100	100	100	100	100	100	100	100	0
ATP-dependent protease La (EC 3.4.21.53) Type I	fig|6666666.157468.peg.255	100	100	100	99.62	99.62	99.62	99.37	99.37	99.37	99.37	99.62	99.62	99.37	99.62	99.87	99.87	99.37	99.75	99.24	99.87	98.86	90.2
Flagellar assembly factor FliW	fig|6666666.157468.peg.257	100	100	100	100	100	100	100	100	100	100	100	100	100	100	100	100	100	100	100	100	99.22	67.09
Pyrroline-5-carboxylate reductase (EC 1.5.1.2)	fig|6666666.157468.peg.258	100	100	100	99.59	99.59	99.59	99.15	99.15	99.15	99.15	98.72	98.72	98.72	98.35	99.18	99.59	98.35	99.15	100	98.77	97.94	98.9
Transformation system protein	fig|6666666.157468.peg.259	100	100	100	99	99	99	99	99	99	99	99	99	99	99	100	99	99	99	100	99	98	96.63
Uroporphyrinogen-III synthase (EC 4.2.1.75)	fig|6666666.157468.peg.262	100	100	100	99.04	99.04	99.04	99.52	99.52	99.52	99.04	99.04	99.04	99.04	99.04	95.69	99.52	99.04	99.52	95.69	100	95.22	88.7
Thiamin-phosphate pyrophosphorylase (EC 2.5.1.3)	fig|6666666.157468.peg.263	100	100	100	99.52	99.52	99.52	98.57	98.57	98.57	99.3	100	100	99.52	99.52	95.24	100	99.52	100	95.24	100	96.19	93.32
Phosphomethylpyrimidine kinase (EC 2.7.4.7)	fig|6666666.157468.peg.264	100	100	100	97.78	97.78	97.78	97.41	97.41	97.41	97.41	99.26	99.26	97.78	97.78	98.15	98.89	97.78	98.89	98.15	99.26	98.52	98.7
Endonuclease III (EC 4.2.99.18)	fig|6666666.157468.peg.265	100	100	100	96.05	96.05	96.05	94.74	94.74	94.74	94.74	100	100	96.05	96.05	96.05	97.37	96.05	100	99.12	100	96.05	98.67
Transcription-repair coupling factor	fig|6666666.157468.peg.267	100	100	100	99.69	99.69	99.69	99.28	99.28	99.28	99.28	99.59	99.59	99.8	99.8	98.77	98.77	99.8	99.8	98.77	99.8	98.16	93.73
Peptidase, M23/M37 family	fig|6666666.157468.peg.269	100	100	100	100	100	100	100	100	100	100	100	100	100	100	98.67	99.33	100	100	99	99.33	98.73	76.43
Dihydrofolate synthase (EC 6.3.2.12) @ Folylpolyglutamate synthase (EC 6.3.2.17)	fig|6666666.157468.peg.270	100	100	100	100	100	100	99.74	99.74	99.74	99.74	99.22	99.22	100	0	98.7	98.7	100	100	98.7	98.7	95.6	93.18
Leucyl-tRNA synthetase (EC 6.1.1.4)	fig|6666666.157468.peg.273	100	100	100	99.88	99.88	99.88	99.38	99.38	99.38	99.38	99.88	99.88	100	100	99.26	99.13	100	100	99.26	99.38	97.65	78.24
Protein-export membrane protein SecF (TC 3.A.5.1.1)	fig|6666666.157468.peg.274	100	100	100	99.69	99.69	99.69	98.76	98.76	98.76	98.76	100	100	99.69	99.69	99.38	99.38	99.69	92.01	99.38	99.38	98.45	97.64
Protein-export membrane protein SecD (TC 3.A.5.1.1)	fig|6666666.157468.peg.275	100	100	100	99.24	99.24	99.24	99.43	99.43	99.43	99.43	99.05	99.05	99.05	99.05	99.62	99.05	99.05	98.86	99.62	99.05	98.67	94.9
Preprotein translocase subunit YajC (TC 3.A.5.1.1)	fig|6666666.157468.peg.276	100	100	100	100	100	100	100	100	100	100	100	100	98.89	100	100	100	100	100	100	100	98.89	94.92
Apolipoprotein N-acyltransferase (EC 2.3.1.-) / Copper homeostasis protein CutE	fig|6666666.157468.peg.277	100	99.77	100	99.77	99.77	99.77	99.07	99.07	98.77	99.07	99.53	99.77	99.53	99.77	99.3	99.07	99.77	99.77	99.3	99.07	95.54	89.02
S-adenosylmethionine synthetase (EC 2.5.1.6)	fig|6666666.157468.peg.278	100	100	100	100	100	100	100	100	100	100	100	100	100	100	99.75	100	100	100	100	100	98.24	94.51
Sodium/dicarboxylate symporter	fig|6666666.157468.peg.279	100	100	100	98.53	98.53	98.53	99.02	99.02	99.02	99.02	99.51	99.51	99.51	99.51	99.02	98.77	99.51	99.26	99.02	99.51	96.07	90.8
Aspartate carbamoyltransferase (EC 2.1.3.2)	fig|6666666.157468.peg.280	100	100	100	99.66	99.66	99.66	99.32	99.32	99.32	99.32	98.98	98.98	98.98	98.98	98.98	98.31	98.98	98.98	99.32	98.98	98.64	60
Oligoendopeptidase F (EC 3.4.24.-)	fig|6666666.157468.peg.281	100	100	100	98.25	98.25	98.25	98.43	98.43	98.43	98.43	98.95	98.95	98.78	98.78	98.43	98.43	98.95	98.78	98.08	98.08	97.91	97.51
ATP-dependent DNA helicase UvrD/PcrA/Rep, epsilon proteobacterial type 2	fig|6666666.157468.peg.283	100	100	100	99.42	99.42	99.42	99.42	99.42	99.42	99.42	99.28	99.28	99.42	99.28	99.13	98.41	99.42	99.42	99.42	99.28	98.26	100
tRNA pseudouridine synthase B (EC 4.2.1.70)	fig|6666666.157468.peg.284	100	100	100	97.79	97.79	97.79	97.79	97.79	97.79	97.79	97.79	97.79	97.43	97.06	97.06	97.43	97.43	97.43	97.06	97.43	96.32	93.57
Carbon storage regulator	fig|6666666.157468.peg.285	100	100	100	100	100	100	100	100	100	100	100	100	100	100	100	100	100	100	100	100	100	78.79
4-diphosphocytidyl-2-C-methyl-D-erythritol kinase (EC 2.7.1.148)	fig|6666666.157468.peg.286	100	100	100	96.86	96.86	96.86	96.86	96.86	96.86	96.86	97.25	97.25	96.47	96.86	97.25	96.86	96.47	96.47	96.86	96.86	96.47	0
tmRNA-binding protein SmpB	fig|6666666.157468.peg.287	100	100	100	98	98	98	98	98	98	98	98.67	98.67	98	98.67	98.67	98	98	98.67	98.67	99.33	98	99.17
ATP-dependent Clp protease adaptor protein ClpS	fig|6666666.157468.peg.289	100	100	100	97.92	97.92	97.92	97.92	97.92	97.92	97.92	97.92	97.92	97.92	97.92	98.96	96.88	97.92	97.92	98.96	97.92	97.92	0
ATP-dependent Clp protease ATP-binding subunit ClpA	fig|6666666.157468.peg.290	100	100	100	98.59	98.59	98.59	98.59	98.59	98.59	98.59	98.59	98.59	98.59	98.59	99.15	98.59	98.59	98.59	99.44	98.87	98.59	81.67
Leucyl/phenylalanyl-tRNA--protein transferase (EC 2.3.2.6)	fig|6666666.157468.peg.291	100	100	100	99.07	99.07	99.07	99.07	99.07	99.07	99.07	99.07	99.07	99.07	99.07	99.53	100	99.07	99.07	99.07	99.07	97.21	86.03
Multiple antibiotic resistance protein marC	fig|6666666.157468.peg.293	100	100	100	98.58	98.58	98.58	98.58	98.58	98.58	98.58	98.58	98.58	98.58	98.56	99.06	98.11	98.58	98.11	99.06	98.56	89.86	65.14
Peptide methionine sulfoxide reductase MsrB (EC 1.8.4.12)	fig|6666666.157468.peg.294	100	100	100	100	100	100	100	100	100	100	100	100	100	99.16	99.16	99.16	100	100	99.16	100	98.32	64.76
CDP-diacylglycerol--serine O-phosphatidyltransferase (EC 2.7.8.8)	fig|6666666.157468.peg.296	100	100	100	100	100	100	100	100	100	100	99.59	99.59	99.59	99.59	99.59	99.59	99.59	99.59	99.59	100	99.59	95.81
Phosphatidylserine decarboxylase-related protein	fig|6666666.157468.peg.297	100	100	100	96.59	96.59	96.59	96.59	96.59	96.59	96.59	99.02	99.02	99.02	98.05	98.54	98.05	99.02	99.02	99.51	99.02	98.05	87.35
Cell division protein FtsH (EC 3.4.24.-)	fig|6666666.157468.peg.298	100	100	100	99.38	99.38	99.38	99.38	99.38	99.38	99.38	99.53	99.53	99.53	99.53	99.69	99.84	99.53	99.53	99.69	99.53	98.91	71.58
Ribosomal protein L11 methyltransferase (EC 2.1.1.-)	fig|6666666.157468.peg.299	100	100	100	100	100	100	100	100	100	100	100	100	100	100	98.58	98.58	100	100	99.64	99.29	98.57	89.66
Chemotaxis regulator - transmits chemoreceptor signals to flagellar motor components CheY	fig|6666666.157468.peg.300	100	100	100	100	100	100	100	100	100	100	100	100	100	100	100	100	100	100	100	100	100	85.31
N-linked glycosylation
N-linked glycosylation glycosyltransferase PglG	fig|6666666.157468.peg.301	100	100	100	100	100	100	100	100	100	100	100	100	100	100	98.99	99.33	100	100	99.66	99.66	100	85.44
UDP-N-acetylglucosamine 4,6-dehydratase (EC 4.2.1.-)	fig|6666666.157468.peg.302	100	100	100	99.15	99.15	99.15	99.15	99.15	99.15	99.15	99.15	99.15	99.15	99.15	98.98	99.15	99.15	98.98	98.98	99.15	97.92	85.71
Lipopolysaccharide biosynthesis protein RffA	fig|6666666.157468.peg.303	100	100	100	99.74	99.74	99.74	99.74	99.74	99.74	99.74	99.74	99.74	99.74	99.74	97.93	97.93	99.74	99.74	99.74	99.74	96.89	90
FIG00732228: membrane protein	fig|6666666.157468.peg.304	100	100	100	99.4	99.4	99.4	99.4	99.4	99.4	99.4	99.4	99.4	99.4	98.8	0	0	99.4	99.4	100	0	0	81.82
4-amino-6-deoxy-N-Acetyl-D-hexosaminyl-(Lipid carrier) acetyltrasferase	fig|6666666.157468.peg.305	100	100	100	95.9	95.9	95.9	95.9	95.9	95.9	95.9	95.9	95.9	95.9	0	94.85	94.85	95.9	95.9	94.87	95.36	93.3	81.25
Lipid carrier : UDP-N-acetylgalactosaminyltransferase (EC 2.4.1.-)	fig|6666666.157468.peg.306	100	100	100	99.5	99.5	99.5	99.5	99.5	99.5	99.5	99	99	99	99.5	98.5	98.5	99	99.5	98.5	97.5	93.5	82.61
Alpha-1,3-N-acetylgalactosamine transferase PglA (EC 2.4.1.-)	fig|6666666.157468.peg.307	100	100	100	98.67	98.67	98.67	99.73	99.73	99.73	99.73	99.73	99.73	99.73	99.73	97.87	98.14	99.73	99.73	98.14	98.67	95.74	77.14
Oligosaccharyltransferase PglB (EC 2.4.1.119)	fig|6666666.157468.peg.308	100	100	100	98.6	98.6	98.6	99.86	99.86	99.86	99.86	99.86	99.86	99.86	99.86	98.6	98.6	99.86	99.86	98.18	99.16	97.48	85.83
Alpha-1,4-N-acetylgalactosamine transferase PglJ (EC 2.4.1.-)	fig|6666666.157468.peg.309	100	100	100	100	100	100	100	100	100	100	100	100	100	100	98.36	98.63	100	100	98.63	98.9	97.26	97.92
Glycosyltransferase PglI (EC 2.4.1.-)	fig|6666666.157468.peg.310	100	100	100	100	100	100	100	100	100	100	100	100	100	100	99.35	99.35	100	100	98.71	99.03	98.06	93.04
Alpha-1,4-N-acetylgalactosamine transferase PglH (EC 2.4.1.-)	fig|6666666.157468.peg.311	100	100	100	99.16	99.16	99.16	98.88	98.88	98.88	98.88	99.16	99.16	99.16	99.16	98.04	96.65	99.16	99.16	97.21	96.65	97.49	83.5
Phospholipid-lipopolysaccharide ABC transporter	fig|6666666.157468.peg.312	100	100	100	100	99.82	100	100	100	100	100	100	100	100	100	98.05	98.58	100	99.82	98.4	98.94	98.05	89.32
Lipooligosasccharide biosynthesis
UDP-glucose 4-epimerase (EC 5.1.3.2)	fig|6666666.157468.peg.313	100	100	100	99.7	99.7	99.7	99.7	99.7	99.7	99.7	99.7	99.7	99.39	99.39	99.09	99.39	99.39	99.7	99.39	99.7	99.09	95.83
Polysaccharide biosynthesis protein WlaX	fig|6666666.157468.peg.314	100	100	100	99.24	99.24	99.24	98.48	98.48	98.48	98.48	97.35	97.35	97.73	97.73	98.86	97.73	97.73	99.62	98.86	98.86	95.44	95.12
Lipopolysaccharide heptosyltransferase I (EC 2.4.1.-)	fig|6666666.157468.peg.315	100	100	100	98.25	98.25	98.25	99.12	99.12	99.12	99.12	98.83	98.83	98.83	98.83	97.95	98.54	98.83	99.42	97.95	99.42	97.66	98.48
Lipid A biosynthesis lauroyl acyltransferase (EC 2.3.1.-)	fig|6666666.157468.peg.316	100	100	100	97.25	97.25	97.25	97.29	97.29	97.29	97.29	97.97	97.97	97.97	97.97	95.25	96.61	97.97	96.61	95.25	99.66	95.25	97.79
Beta-1,3-galactosyltransferase / Beta-1,4-galactosyltransferase	fig|6666666.157468.peg.318	100	100	100	50	50	50	53.6	53.6	53.6	53.6	72.22	72.22	54.04	54.04	54.29	46.51	54.04	45.93	45.93	96.95	95.93	89.74
Beta-1,3-galactosyltransferase / Beta-1,4-galactosyltransferase	fig|6666666.157468.peg.319	100	100	100	49.43	49.43	49.43	53.16	53.16	53.16	53.16	59.68	59.68	54.55	54.55	55.7	55.7	54.55	55.7	55.7	98.51	53.01	84.38
Beta-1,3-galactosyltransferase / Beta-1,4-galactosyltransferase	fig|6666666.157468.peg.320	100	100	100	45.1	45.1	45.1	55.28	55.28	55.28	55.28	84.26	84.26	46.84	46.84	65.71	50.17	46.84	50.17	50.17	97.83	58.42	86.36
Beta-1,3-galactosyltransferase / Beta-1,4-galactosyltransferase	fig|6666666.157468.peg.322	100	100	100	90.74	90.74	90.74	91.82	91.82	91.82	91.82	92.19	92.19	92.19	92.19	89.78	92.19	92.19	91.82	92.94	100	97.77	98.44
ADP-heptose--lipooligosaccharide heptosyltransferase II (EC 2.4.1.-)	fig|6666666.157468.peg.323	100	100	100	94.57	94.57	94.57	93.93	93.93	93.93	93.93	92.62	92.62	92.62	92.65	95.53	98.1	92.62	93.93	94.25	100	96.52	100
Beta-1,4-galactosyltransferase	fig|6666666.157468.peg.324	100	100	100	28.78	28.78	28.78	0	0	0	0	0	0	0	0	67.9	96.53	0	0	0	100	96.06	100
Phosphoheptose isomerase 1 (EC 5.3.1.-)	fig|6666666.157468.peg.325	100	100	100	98.92	98.92	98.92	98.39	98.39	98.39	98.39	96.77	96.77	96.77	96.77	97.31	98.92	96.77	98.39	97.85	100	96.77	100
ADP-heptose synthase (EC 2.7.-.-) / D-glycero-beta-D-manno-heptose 7-phosphate kinase	fig|6666666.157468.peg.326	100	100	100	98.05	98.05	98.05	95.57	95.57	95.57	95.57	96.45	96.45	96.01	95.79	94.46	97.78	95.79	96.01	95.79	100	94.68	77.04
ADP-L-glycero-D-manno-heptose-6-epimerase (EC 5.1.3.20)	fig|6666666.157468.peg.327	100	100	100	98.74	98.74	98.74	99.37	99.37	99.37	99.37	99.37	99.37	99.37	99.37	99.37	99.05	99.37	98.11	99.37	99.05	98.42	92.47
D-glycero-D-manno-heptose 1,7-bisphosphate phosphatase (EC 3.1.1.-)	fig|6666666.157468.peg.328	100	100	100	97.85	97.85	97.85	100	100	100	100	100	100	100	0	98.39	100	100	99.42	96.77	95.38	96.51	97.67
Cytochrome C553 (soluble cytochrome f)	fig|6666666.157468.peg.329	100	100	100	100	100	100	100	100	100	100	100	100	100	100	100	100	100	100	100	100	99	74.36
Type cbb3 cytochrome oxidase biogenesis protein CcoS, involved in heme b insertion	fig|6666666.157468.peg.330	100	100	100	100	100	100	100	100	100	100	98.53	98.53	100	100	100	100	100	100	100	100	98.53	0
Lead, cadmium, zinc and mercury transporting ATPase (EC 3.6.3.3) (EC 3.6.3.5); Copper-translocating P-type ATPase (EC 3.6.3.4)	fig|6666666.157468.peg.331	100	100	100	98.72	98.72	98.72	100	100	100	100	98.85	98.85	99.87	99.74	98.34	99.23	100	99.74	98.34	99.23	96.81	69.83
Transcription termination factor Rho	fig|6666666.157468.peg.332	100	100	100	100	100	100	100	100	100	100	100	100	100	100	99.77	99.77	100	100	99.77	100	99.07	70
DNA polymerase III subunits gamma and tau (EC 2.7.7.7)	fig|6666666.157468.peg.333	100	100	100	97.45	97.45	97.45	100	100	100	100	100	100	100	97.25	98.23	97.45	100	97.05	98.23	97.84	95.09	85.66
Lead, cadmium, zinc and mercury transporting ATPase (EC 3.6.3.3) (EC 3.6.3.5); Copper-translocating P-type ATPase (EC 3.6.3.4)	fig|6666666.157468.peg.335	100	100	100	98.28	98.28	98.28	100	100	100	100	97.15	97.15	100	97.99	96.99	97.99	100	98.57	96.85	96.56	96.13	89.18
Cobalt-zinc-cadmium resistance protein CzcD	fig|6666666.157468.peg.337	100	100	100	99.68	99.68	99.68	99.05	99.05	99.05	98.57	100	100	100	100	98.73	99.05	100	100	98.73	99.68	97.47	78.77
Arginine/ornithine antiporter ArcD	fig|6666666.157468.peg.339	100	100	100	100	100	100	100	100	100	100	100	100	100	100	99.39	99.39	100	100	99.39	100	0	93.89
Arginine/ornithine antiporter ArcD	fig|6666666.157468.peg.340	100	100	100	98.45	98.45	98.45	99.61	99.61	99.61	99.61	99.22	99.22	99.61	99.22	99.61	100	99.61	99.22	100	100	0	96.4
L-lactate dehydrogenase (EC 1.1.1.27)	fig|6666666.157468.peg.341	100	100	100	98.7	98.7	98.7	98.7	98.7	98.7	98.7	98.7	98.7	98.7	98.38	99.35	98.38	98.7	98.7	98.38	99.03	97.69	78.67
Peptidyl-prolyl cis-trans isomerase (EC 5.2.1.8)	fig|6666666.157468.peg.345	100	100	100	100	100	100	100	100	100	100	99.38	99.38	99.38	99.38	100	100	99.38	100	100	99.38	97.5	98.57
Spermidine export protein MdtJ	fig|6666666.157468.peg.347	100	100	100	100	100	100	98.23	98.23	98.23	98.23	98.23	98.23	99.12	99.12	98.23	99.12	99.12	98.23	100	99.12	100	96.53
Spermidine export protein MdtI	fig|6666666.157468.peg.348	100	100	100	100	100	100	100	100	100	100	99.02	99.02	97.06	99.02	100	100	99.02	98.81	99.02	99.02	96.08	99.69
Arginyl-tRNA synthetase (EC 6.1.1.19)	fig|6666666.157468.peg.349	100	100	100	98.3	98.3	98.3	98.49	98.49	98.49	98.49	98.68	98.68	98.49	99.06	98.49	98.87	98.49	98.68	98.11	98.87	97.55	87.27
Twin-arginine translocation protein TatA	fig|6666666.157468.peg.350	100	100	100	100	100	100	100	100	100	100	100	100	100	100	100	100	100	100	100	100	100	96.64
Guanylate kinase (EC 2.7.4.8)	fig|6666666.157468.peg.351	100	100	100	98.54	98.54	98.54	98.54	98.54	98.54	98.54	98.54	98.54	98.54	98.05	98.05	99.02	98.54	98.54	98.54	98.54	97.07	95.88
Highly acidic protein	fig|6666666.157468.peg.352	100	100	100	94.76	94.76	94.76	94.76	95.34	94.76	98.16	94.76	94.76	93.71	95.1	95.1	93.01	94.76	95.1	94.76	96.06	94.53	96.94
Flagellar biosynthesis protein FliR	fig|6666666.157468.peg.353	100	100	100	99.21	99.21	99.21	99.21	99.21	99.21	99.21	99.21	99.21	99.21	99.21	99.61	99.22	99.21	99.21	99.61	100	99.61	88.43
Translation elongation factor Ts	fig|6666666.157468.peg.355	100	100	100	99.44	99.44	99.44	99.44	99.44	99.44	99.44	99.44	99.44	99.44	99.44	99.16	99.72	99.44	99.72	99.16	99.72	98.88	100
SSU ribosomal protein S2p (SAe)	fig|6666666.157468.peg.356	100	100	100	100	100	100	100	100	100	100	99.62	99.62	99.62	99.24	99.62	99.62	100	99.24	99.24	99.62	98.48	86.33
Cyclopropane-fatty-acyl-phospholipid synthase (EC 2.1.1.79)	fig|6666666.157468.peg.357	100	100	100	99.74	99.74	99.74	99.74	99.74	99.74	99.74	99.22	99.22	99.48	92.76	99.22	91.73	99.74	99.48	99.22	99.74	99.48	79.7
ubiquinol cytochrome C oxidoreductase, cytochrome C1 subunit	fig|6666666.157468.peg.358	100	100	100	100	100	100	100	100	100	100	100	100	100	99.73	98.4	99.73	100	100	98.4	100	98.93	85.55
Ubiquinol--cytochrome c reductase, cytochrome B subunit (EC 1.10.2.2)	fig|6666666.157468.peg.359	100	100	100	100	100	100	99.76	99.76	99.76	99.76	100	100	99.76	100	99.76	100	100	100	99.76	100	99.28	96.52
Ubiquinol-cytochrome C reductase iron-sulfur subunit (EC 1.10.2.2)	fig|6666666.157468.peg.360	100	100	100	100	100	100	100	100	100	100	100	100	100	100	100	100	100	100	100	100	98.8	93.12
Arsenic efflux pump protein	fig|6666666.157468.peg.361	100	100	100	100	100	100	100	100	100	100	100	100	98.83	98.83	99.3	99.3	100	97.66	99.3	99.3	87.72	86.74
tRNA uridine 5-carboxymethylaminomethyl modification enzyme GidA	fig|6666666.157468.peg.362	100	100	100	99.84	99.84	99.84	99.52	99.52	99.52	99.52	100	100	98.87	98.71	98.71	98.87	100	98.71	98.55	98.87	97.25	95.4
Signal transduction protein CetB, mediates an energy taxis response	fig|6666666.157468.peg.363	100	100	100	99.39	99.39	100	100	100	100	100	100	100	99.39	99.39	99.39	99.39	100	99.39	99.39	99.39	95.18	94.17
Signal transduction protein CetA, mediates an energy taxis response	fig|6666666.157468.peg.364	100	99.46	99.35	100	100	100	100	100	100	100	100	100	100	99.78	99.78	99.35	99.76	99.56	99.56	99.35	95.86	93.78
Signal transduction protein CetB, mediates an energy taxis response	fig|6666666.157468.peg.365	100	100	100	100	100	100	100	100	100	100	100	100	100	100	100	95.73	100	98.17	100	96.95	88	90.14
Dihydroorotase (EC 3.5.2.3)	fig|6666666.157468.peg.369	100	100	100	99.23	99.23	99.23	100	100	100	100	98.98	98.98	100	99.49	99.74	99.23	100	99.23	99.74	99.74	97.45	96.38
Glycerol-3-phosphate dehydrogenase [NAD(P)+] (EC 1.1.1.94)	fig|6666666.157468.peg.370	100	100	100	98.99	98.99	98.99	100	100	100	100	98.99	98.99	99.66	0	98.32	99.33	100	98.32	98.32	98.99	97.64	97.47
Aspartyl-tRNA(Asn) amidotransferase subunit B (EC 6.3.5.6) @ Glutamyl-tRNA(Gln) amidotransferase subunit B (EC 6.3.5.7)	fig|6666666.157468.peg.371	100	100	100	98.73	98.73	98.73	100	100	100	0	99.15	99.15	100	100	98.73	98.94	100	98.94	98.73	98.73	96.19	89.9
S-ribosylhomocysteine lyase (EC 4.4.1.21) / Autoinducer-2 production protein LuxS	fig|6666666.157468.peg.372	100	100	100	98.17	98.17	98.17	100	100	100	100	96.95	96.95	100	100	96.34	98.17	100	97.56	96.95	98.17	87.12	93.93
Methionine ABC transporter substrate-binding protein	fig|6666666.157468.peg.374	100	100	100	98.05	98.05	98.05	100	100	100	100	98.44	98.44	100	99.61	97.66	98.44	100	97.66	98.05	98.05	98.44	100
5-methyltetrahydropteroyltriglutamate--homocysteine methyltransferase (EC 2.1.1.14)	fig|6666666.157468.peg.375	100	100	100	98.67	98.67	98.67	99.34	99.34	99.34	99.34	99.2	99.2	99.34	99.07	98.94	99.2	99.34	100	99.34	99.87	96.68	87.9
5,10-methylenetetrahydrofolate reductase (EC 1.5.1.20)	fig|6666666.157468.peg.376	100	100	100	98.58	98.58	98.58	98.94	98.94	98.94	98.94	99.29	99.29	98.94	98.94	98.94	98.58	98.94	100	98.58	98.94	92.2	96.1
ATP synthase F0 sector subunit a (EC 3.6.3.14)	fig|6666666.157468.peg.378	100	100	100	100	100	100	99.56	99.56	99.56	99.56	100	100	99.56	99.56	100	98.67	99.56	100	99.56	100	97.35	94.49
DNA repair protein RadA	fig|6666666.157468.peg.379	100	100	100	99.1	99.1	99.1	99.1	99.1	99.1	99.1	99.55	99.55	99.1	99.33	100	99.1	99.33	98.65	100	100	97.31	98.89
Signal recognition particle receptor protein FtsY (=alpha subunit) (TC 3.A.5.1.1)	fig|6666666.157468.peg.380	100	100	100	99.65	99.65	99.65	99.65	99.65	99.65	99.65	99.31	99.31	99.65	99.31	100	99.31	99.65	99.31	100	100	95.83	86.72
FIG002344: Hydrolase (HAD superfamily)	fig|6666666.157468.peg.383	100	100	100	99.81	99.81	99.81	99.81	99.81	99.81	99.81	99.81	99.81	99.81	99.81	100	99.81	99.81	99.81	99.81	100	98.45	91.81
Arginine/ornithine antiporter ArcD	fig|6666666.157468.peg.384	100	100	100	99.46	99.46	99.46	99.46	99.46	99.46	99.46	99.46	99.46	99.46	99.46	98.92	98.38	99.46	100	99.46	99.46	96.22	97.34
Inner membrane protein YihY, formerly thought to be RNase BN	fig|6666666.157468.peg.385	100	100	100	100	100	100	100	100	100	99.63	100	100	100	100	100	99.25	100	100	99.63	100	98.88	97.9
(S)-2-hydroxy-acid oxidase (EC 1.1.3.15)	fig|6666666.157468.peg.386	100	100	100	99.35	99.35	99.35	99.35	99.35	99.35	99.35	99.35	99.35	99.35	99.35	99.78	98.7	99.35	99.35	99.78	99.78	99.13	98.1
Membrane proteins related to metalloendopeptidases	fig|6666666.157468.peg.388	100	100	100	99.74	99.74	99.74	99.74	99.74	99.74	99.74	99.74	99.74	99.74	99.74	99.48	99.74	99.74	99.74	99.74	99.22	98.7	67.05
Riboflavin synthase eubacterial/eukaryotic (EC 2.5.1.9)	fig|6666666.157468.peg.391	100	100	100	96.55	96.55	96.55	96.55	96.55	96.55	96.55	97.54	97.54	99.51	96.55	97.04	97.54	96.55	96.55	97.04	96.55	98.03	83.72
Heat shock protein 60 family co-chaperone GroES	fig|6666666.157468.peg.393	100	100	100	100	100	100	100	100	100	100	100	100	100	100	100	98.84	100	0	100	100	98.84	0
Heat shock protein 60 family chaperone GroEL	fig|6666666.157468.peg.394	100	100	100	100	100	100	100	100	100	100	100	100	100	100	100	99.45	100	99.67	100	99.82	99.45	65.5
Two-component system histidine kinase DccS	fig|6666666.157468.peg.395	100	100	100	98.99	98.99	98.99	98.99	98.99	98.99	99.36	98.99	98.99	99.49	98.99	98.99	99.49	98.99	98.99	99.24	99.24	97.56	97.82
Two-component system response regulator DccR	fig|6666666.157468.peg.396	100	100	100	99.55	99.55	99.55	99.55	99.55	99.55	99.55	99.55	99.55	99.55	99.55	99.55	99.55	99.55	99.55	99.55	99.55	97.74	88.05
Hemerythrin-like iron-binding protein	fig|6666666.157468.peg.397	100	100	100	97.99	97.99	97.99	97.99	97.99	97.99	97.99	97.49	97.49	97.99	97.99	97.99	96.98	97.99	97.99	97.99	97.99	93.75	95.83
Ribbon-helix-helix protein, copG family domain protein	fig|6666666.157468.peg.398	100	100	100	100	100	100	100	100	100	100	100	100	100	100	100	96.25	100	100	100	100	97.14	97.93
HtrA protease/chaperone protein / Serine protease (Protease DO) (EC 3.4.21.-)	fig|6666666.157468.peg.401	100	100	100	99.79	99.79	99.79	99.58	99.58	99.58	99.58	99.58	99.58	99.58	99.58	99.58	98.73	99.58	99.58	99.36	99.79	97.67	84.87
DnaJ-class molecular chaperone CbpA	fig|6666666.157468.peg.402	100	100	100	99.66	99.66	99.66	99.66	99.66	99.66	99.66	99.66	99.66	99.66	99.66	99.33	99.33	99.66	99.66	98.99	99.33	93.94	96.89
HspR, transcriptional repressor of DnaK operon	fig|6666666.157468.peg.403	100	100	100	99.19	99.19	99.19	99.19	99.19	99.19	99.19	99.19	99.19	99.19	99.19	98.39	97.58	99.19	99.19	99.19	97.58	98.39	91.74
Glutathione-regulated potassium-efflux system protein KefB	fig|6666666.157468.peg.404	100	100	100	100	100	100	100	100	100	100	100	100	100	100	99.82	99.8	100	100	99.63	99.82	98.34	78.33
Glycyl-tRNA synthetase beta chain (EC 6.1.1.14)	fig|6666666.157468.peg.407	100	100	100	99.85	99.85	99.85	99.7	99.7	99.7	99.7	99.55	99.55	99.7	99.7	98.34	98.49	99.7	99.55	98.34	99.55	97.14	94.74
Membrane protein related to metalloendopeptidases	fig|6666666.157468.peg.408	100	100	100	96.7	96.7	96.7	96.7	96.7	96.7	96.7	96.7	96.7	96.7	96.7	95.97	95.24	96.7	96.34	95.97	98.9	94.87	90.34
Pyridoxine 5'-phosphate synthase (EC 2.6.99.2)	fig|6666666.157468.peg.411	100	100	100	98.05	98.05	98.05	98.83	98.83	98.83	98.83	98.83	98.83	98.83	98.83	96.48	99.61	98.83	98.83	96.48	98.83	94.16	91.86
4-hydroxythreonine-4-phosphate dehydrogenase (EC 1.1.1.262)	fig|6666666.157468.peg.412	100	100	100	96.43	96.43	96.43	97.53	97.53	97.53	97.53	97.53	97.53	97.53	97.53	96.98	98.35	97.53	97.53	96.98	99.18	94.49	85.61
Uroporphyrinogen III decarboxylase (EC 4.1.1.37)	fig|6666666.157468.peg.416	100	100	100	99.12	99.12	99.12	99.41	99.41	99.41	99.41	99.41	99.41	99.41	99.41	99.41	99.71	99.41	99.41	99.41	100	98.24	90.88
membrane protein	fig|6666666.157468.peg.418	100	100	100	98.49	98.49	98.49	99.75	99.75	99.75	99.75	99.75	99.75	99.75	99.75	98.49	100	99.75	99.75	99.5	99.5	97.72	98.08
Excinuclease ABC subunit C	fig|6666666.157468.peg.419	100	100	100	98.5	98.5	98.5	99	99	99	99	99	99	99	98.83	97	98.33	99	99	96.83	100	94.83	98.27
GMP synthase [glutamine-hydrolyzing] (EC 6.3.5.2)	fig|6666666.157468.peg.422	100	100	100	98.24	98.24	98.24	98.04	98.04	98.04	97.85	98.24	98.24	98.04	98.04	98.43	99.02	98.04	98.04	99.02	99.22	98.43	89.71
Phosphoribosylamine--glycine ligase (EC 6.3.4.13)	fig|6666666.157468.peg.424	100	100	100	100	100	100	100	100	100	100	99.52	99.52	100	100	99.52	99.76	100	100	99.28	100	99.04	98.96
Outer membrane protein Imp, required for envelope biogenesis / Organic solvent tolerance protein precursor	fig|6666666.157468.peg.426	100	100	100	99.85	99.85	99.85	99.71	99.71	99.71	99.71	98.97	98.97	99.41	100	98.97	98.68	100	100	99.71	99.56	98.83	89.8
Polyribonucleotide nucleotidyltransferase (EC 2.7.7.8)	fig|6666666.157468.peg.427	100	100	100	98.33	98.33	98.33	98.47	98.47	98.47	97.94	98.33	98.33	98.61	98.47	98.47	99.17	98.47	98.47	98.47	99.3	97.77	94.32
G:T/U mismatch-specific uracil/thymine DNA-glycosylase	fig|6666666.157468.peg.428	100	100	100	94.38	94.38	94.38	97.5	97.5	97.5	97.5	96.88	96.88	94.38	94.38	95	95.62	94.38	94.38	94.38	100	93.75	94.81
Arginine/ornithine antiporter ArcD	fig|6666666.157468.peg.429	100	100	100	99.09	99.09	99.09	100	100	100	100	100	100	99.09	99.09	99.09	99.55	99.09	99.09	99.09	100	98.64	95.78
Multidrug-efflux transporter, major facilitator superfamily (MFS) (TC 2.A.1)	fig|6666666.157468.peg.430	100	100	100	99.49	99.49	99.49	99.38	99.38	99.38	99.38	97.46	97.46	98.73	98.73	98.48	98.98	99.49	98.73	98.48	0	97.72	87.09
Low molecular weight protein tyrosine phosphatase (EC 3.1.3.48)	fig|6666666.157468.peg.431	100	100	100	100	100	100	100	100	100	100	98.01	98.01	99.34	99.34	99.34	98.68	99.34	100	99.34	98.68	98.68	99.86
Major outer membrane protein	fig|6666666.157468.peg.432	100	100	100	88.94	88.94	88.94	99.53	99.53	99.29	99.53	86.82	86.82	98.11	95.28	94.34	90.82	97.17	97.65	90.82	71.2	74.09	72
Chaperone protein DnaJ	fig|6666666.157468.peg.433	100	100	100	100	100	100	100	100	100	100	97.33	97.33	100	100	97.86	98.4	100	100	100	99.2	96.26	89.86
Two-component system response regulator RacR	fig|6666666.157468.peg.434	100	100	100	100	100	100	100	100	100	100	99.55	99.55	100	100	100	100	100	100	99.1	100	97.76	70.25
Two-component system histidine kinase DccS	fig|6666666.157468.peg.435	100	100	100	99.03	99.03	99.03	100	100	100	100	99.51	99.51	100	99.76	99.76	99.27	99.76	99.27	98.3	99.51	95.86	88.44
Recombination protein RecR	fig|6666666.157468.peg.436	100	100	100	97.89	97.89	97.89	100	100	100	100	100	100	100	99.47	100	100	99.47	99.47	98.95	99.47	97.89	95.65
Hydrogenase maturation protease (EC 3.4.24.-)	fig|6666666.157468.peg.437	100	100	100	99.4	99.4	99.4	100	100	100	100	99.4	99.4	100	0	99.4	100	99.4	99.4	98.8	99.4	94.58	72.53
Quinone-reactive Ni/Fe hydrogenase, cytochrome b subunit	fig|6666666.157468.peg.438	100	100	100	99.57	99.57	99.57	100	100	100	100	99.57	99.57	100	99.57	99.57	100	99.57	99.57	99.57	100	97.83	100
Quinone-reactive Ni/Fe-hydrogenase large chain (EC 1.12.5.1)	fig|6666666.157468.peg.439	100	100	100	99.65	99.65	99.65	100	100	100	100	99.47	99.47	100	99.47	99.47	99.82	99.47	99.47	99.3	99.47	98.6	90.97
Quinone-reactive Ni/Fe-hydrogenase small chain precursor (EC 1.12.5.1)	fig|6666666.157468.peg.440	100	100	100	99.47	99.47	99.47	100	100	100	100	98.94	98.94	100	99.47	98.94	100	99.47	99.47	98.94	99.17	98.94	77
tRNA (5-methylaminomethyl-2-thiouridylate)-methyltransferase (EC 2.1.1.61) / FAD-dependent cmnm(5)s(2)U34 oxidoreductase	fig|6666666.157468.peg.441	100	100	100	99.18	99.18	99.18	100	100	100	100	96.25	96.25	96.41	99.18	96.25	98.21	99.18	99.18	95.92	97.55	95.76	99.39
N-acetylmuramoyl-L-alanine amidase (EC 3.5.1.28)	fig|6666666.157468.peg.442	100	100	100	99.09	99.09	99.09	99.09	99.09	99.09	99.09	97.27	97.27	97.12	99.09	97.12	97.12	99.09	98.93	97.42	99.24	97.42	74.39
Enoyl-[acyl-carrier-protein] reductase [FMN] (EC 1.3.1.9)	fig|6666666.157468.peg.443	100	100	100	100	100	100	100	100	100	100	99.45	99.45	100	100	99.45	99.72	100	100	99.45	100	99.45	87.8
Tyrosyl-tRNA synthetase (EC 6.1.1.1)	fig|6666666.157468.peg.444	100	100	100	99.75	99.75	99.75	99.5	99.5	99.5	99.5	99.25	99.25	99.5	99.5	99.25	99.75	99.5	99.5	99.5	99	98.25	99.38
GTP pyrophosphokinase (EC 2.7.6.5), (p)ppGpp synthetase II / Guanosine-3',5'-bis(diphosphate) 3'-pyrophosphohydrolase (EC 3.1.7.2)	fig|6666666.157468.peg.445	100	100	100	99.86	99.86	99.86	99.59	99.59	99.59	99.59	99.45	99.45	99.59	99.59	99.59	99.59	99.59	99.59	99.59	99.73	99.73	81.62
DNA-directed RNA polymerase omega subunit (EC 2.7.7.6)	fig|6666666.157468.peg.446	100	100	100	97.3	97.3	97.3	98.65	98.65	98.65	98.65	98.65	98.65	98.65	98.65	98.65	98.65	98.65	98.65	98.65	98.65	98.65	80.34
Uridine monophosphate kinase (EC 2.7.4.22)	fig|6666666.157468.peg.447	100	100	100	99.58	99.58	99.58	99.58	99.58	99.58	99.25	99.58	99.58	99.58	99.58	100	100	99.58	99.58	100	100	99.58	91.88
Membrane-bound metallopeptidase	fig|6666666.157468.peg.448	100	100	100	99.75	99.75	99.75	97.23	97.23	97.23	100	97.23	97.23	97.23	97.23	96.98	97.23	97.23	97.23	96.98	98.49	95.97	89.87
Cell division protein FtsX	fig|6666666.157468.peg.449	100	100	100	99.25	99.25	99.25	99.25	99.25	99.25	99.25	99.25	99.25	99.25	99.25	98.88	99.25	99.25	99.25	98.88	98.88	98.13	80.77
Cell division transporter, ATP-binding protein FtsE (TC 3.A.5.1.1)	fig|6666666.157468.peg.450	100	100	100	99.55	99.55	99.55	100	100	100	100	100	100	100	100	99.55	100	100	100	99.55	99.55	98.64	92.31
tRNA (guanine46-N7-)-methyltransferase (EC 2.1.1.33)	fig|6666666.157468.peg.451	100	100	100	99.23	99.23	99.23	99.23	99.23	99.23	99.23	99.23	99.23	99.23	99.23	98.72	98.47	99.23	99.23	98.72	99.23	97.96	91.99
Ribosomal large subunit pseudouridine synthase D (EC 4.2.1.70)	fig|6666666.157468.peg.453	100	100	100	98.14	98.14	98.14	98.45	98.45	98.45	98.45	98.45	98.45	98.45	98.45	97.83	98.14	98.45	98.45	97.83	99.07	97.83	96.39
Rod shape-determining protein RodA	fig|6666666.157468.peg.454	100	100	100	99.73	99.73	99.73	100	100	100	100	99.73	99.73	100	99.73	100	100	100	99.73	100	99.73	99.73	0
Zinc transporter ZupT	fig|6666666.157468.peg.458	100	100	100	98.96	98.96	98.96	99.65	99.65	99.65	99.65	99.65	99.65	99.65	99.31	99.31	98.96	99.65	99.31	99.31	98.28	92.86	94.25
Motility accessory factor	fig|6666666.157468.peg.466	100	100	0	100	100	100	100	0	100	100	0	100	97.5	0	0	0	0	0	0	0	0	0
Integrase-recombinase protein XERCD family	fig|6666666.157468.peg.467	100	98.65	99.1	33.04	33.04	33.04	32.59	32.59	32.59	32.59	32.59	32.59	32.59	32.59	33.04	33.04	32.59	32.59	33.04	97.31	97.14	81.14
Integrase-recombinase protein XERCD family	fig|6666666.157468.peg.468	100	97.67	98.84	0	0	0	0	0	0	0	0	0	0	0	0	0	0	0	0	98.84	97.67	89.8
Glucose-1-phosphate thymidylyltransferase (EC 2.7.7.24)	fig|6666666.157468.peg.469	100	33.95	33.95	98.97	98.97	98.97	32.6	32.6	32.6	32.6	32.04	32.04	33.33	30.94	32.72	31.48	30.94	30.94	23.36	34.07	31.52	82.19
Flagellin	fig|6666666.157468.peg.472	100	70.82	92.11	90.73	90.73	90.73	92.05	90.73	92.05	92.05	92.05	92.05	93.36	90.07	73.86	70.68	90.07	90.07	71.15	83.5	82.12	98.96
Arsenate reductase (EC 1.20.4.1)	fig|6666666.157468.peg.473	100	0	0	0	0	0	0	0	0	0	0	0	0	0	0	0	0	0	0	100	0	92.86
Arsenical resistance operon repressor	fig|6666666.157468.peg.474	100	86.84	86.84	97.37	97.37	97.37	86.84	86.84	86.84	86.84	86.84	86.84	86.84	97.37	97.37	88.16	86.84	97.37	88.16	98.84	0	94.23
Filamentous haemagglutinin domain protein	fig|6666666.157468.peg.480	100	100	100	99.6	99.6	99.6	90.31	90.31	90.31	91.19	90.31	90.31	90.31	90.31	90.22	90.22	90.31	93.1	90.67	97.59	0	88.5
Filamentous haemagglutinin domain protein	fig|6666666.157468.peg.481	100	100	100	96.69	96.69	96.69	98.11	98.11	98.11	98.11	98.11	98.11	98.11	98.11	33.58	33.58	98.11	99.29	43.41	98.33	0	97.37
Filamentous haemagglutinin domain protein	fig|6666666.157468.peg.482	100	100	100	69.86	69.86	69.86	74.67	74.67	74.67	74.67	74.67	74.67	74.67	74.67	73.97	73.97	74.67	100	72.6	69.86	0	0
Histidine-binding protein precursor	fig|6666666.157468.peg.485	100	100	100	98.8	98.8	98.8	99.2	99.2	99.2	99.2	99.2	99.2	99.2	99.2	99.2	99.6	99.2	98.8	98.8	99.6	95.62	86.09
Phosphoserine phosphatase (EC 3.1.3.3)	fig|6666666.157468.peg.486	100	100	100	98.92	98.92	98.92	98.92	98.92	98.92	98.92	98.92	98.92	98.92	98.92	98.92	97.85	98.92	98.92	98.85	98.92	0	93.46
Phosphoserine phosphatase (EC 3.1.3.3)	fig|6666666.157468.peg.487	100	100	100	98.33	98.33	98.33	98.33	98.33	98.33	98.33	98.33	98.33	98.33	98.33	100	100	98.33	98.33	98.33	100	0	95
Ferric iron ABC transporter, ATP-binding protein	fig|6666666.157468.peg.488	100	100	100	99.6	99.6	99.6	98.8	98.8	98.8	98.8	98.8	98.8	98.8	98.8	100	99.2	98.8	98.8	99.2	100	39.87	92.11
Ferric iron ABC transporter, ATP-binding protein	fig|6666666.157468.peg.489	100	100	100	100	100	100	100	0	100	100	100	100	100	100	100	100	100	100	100	0	54.9	95.13
Thiamin ABC transporter, transmembrane component	fig|6666666.157468.peg.490	100	100	100	96.91	96.91	96.91	97.68	97.68	97.68	97.68	97.68	97.68	97.68	97.68	98.84	98.07	97.68	97.68	97.68	98.46	27.19	89.62
ABC transporter permease protein	fig|6666666.157468.peg.491	100	100	100	98.92	98.92	98.92	99.28	99.28	99.28	99.28	98.21	98.21	99.28	99.28	98.21	98.92	99.28	99.28	99.28	98.21	0	94.44
Ferric iron ABC transporter, iron-binding protein	fig|6666666.157468.peg.495	100	100	100	99.14	99.14	99.14	99.14	99.14	99.14	99.14	98.85	98.85	99.14	99.14	98.85	100	99.14	99.14	97.87	99.71	0	96.44
Magnesium and cobalt transport protein CorA	fig|6666666.157468.peg.496	100	100	100	99.69	99.69	99.69	99.69	99.69	99.69	99.45	99.69	99.69	99.69	99.69	99.39	99.69	99.69	99.69	100	99.69	94.8	97.71
Molybdopterin biosynthesis molybdochelatase MogA	fig|6666666.157468.peg.497	100	100	100	99.44	99.44	99.44	99.44	99.44	99.44	99.44	99.44	99.44	99.44	99.44	99.44	98.89	99.44	99.44	98.89	99.44	98.89	93.39
Protein-N(5)-glutamine methyltransferase PrmC, methylates polypeptide chain release factors RF1 and RF2	fig|6666666.157468.peg.500	100	100	100	98.15	98.15	98.15	98.15	98.15	98.15	98.15	96.68	96.68	98.52	98.15	97.42	97.42	98.15	98.15	97.42	96.31	95.2	80
Arginine/ornithine antiporter ArcD	fig|6666666.157468.peg.501	100	100	100	99.36	99.36	99.36	98.72	98.72	98.72	98.72	97.44	97.44	98.72	98.72	98.08	97.44	98.72	99.36	97.44	97.44	96.79	0
Flagellin C	fig|6666666.157468.peg.502	100	100	100	100	100	100	99.19	99.19	99.19	99.19	100	100	99.19	99.19	98.79	99.19	99.19	99.6	99.19	100	93.95	78.98
DNA polymerase III alpha subunit (EC 2.7.7.7)	fig|6666666.157468.peg.504	100	100	100	99.33	99.33	99.33	99.42	99.42	99.42	99.42	99.42	99.42	99.42	99.42	99.5	99.42	99.42	99.42	99.5	99.58	98.08	94.68
Arsenate reductase (EC 1.20.4.1)	fig|6666666.157468.peg.505	100	100	100	98.17	98.17	98.17	98.17	98.17	98.17	98.17	98.17	98.17	98.17	98.17	98.17	98.17	98.94	98.94	98.17	100	97.25	0
2-keto-3-deoxy-D-arabino-heptulosonate-7-phosphate synthase II (EC 2.5.1.54)	fig|6666666.157468.peg.506	100	100	100	99.78	99.78	99.78	99.55	99.55	99.55	99.55	99.55	99.55	99.55	99.55	99.1	98.88	99.55	99.55	99.1	100	98.21	93.54
Transthyretin-like periplasmic protein	fig|6666666.157468.peg.507	100	100	100	100	100	100	100	100	100	100	100	100	100	100	100	100	100	100	100	100	96.39	89.52
LSU ribosomal protein L19p	fig|6666666.157468.peg.508	100	100	100	100	100	100	100	100	100	97.06	100	100	100	100	99.15	99.15	100	100	99.15	100	98.31	93.43
tRNA (Guanine37-N1) -methyltransferase (EC 2.1.1.31)	fig|6666666.157468.peg.509	100	100	100	98.65	98.65	98.65	98.65	98.65	98.65	98.65	98.65	98.65	98.65	98.65	98.65	98.65	98.65	98.65	98.65	99.55	97.3	93.26
16S rRNA processing protein RimM	fig|6666666.157468.peg.510	100	100	100	100	100	100	98.88	98.88	98.88	98.88	98.88	98.88	98.88	98.88	98.32	98.32	98.88	98.88	98.32	98.32	99.44	88.93
KH domain RNA binding protein YlqC	fig|6666666.157468.peg.511	100	100	100	98.75	98.75	98.75	98.75	98.75	98.75	98.75	98.75	98.75	98.75	98.75	98.75	98.75	98.75	98.75	98.75	98.75	97.5	99
SSU ribosomal protein S16p	fig|6666666.157468.peg.512	100	100	100	100	100	100	100	100	100	100	100	100	100	100	100	100	100	100	100	100	100	90.5
Signal recognition particle, subunit Ffh SRP54 (TC 3.A.5.1.1)	fig|6666666.157468.peg.513	100	100	100	98.65	98.65	98.65	98.65	98.65	98.65	98.65	98.43	98.43	98.65	98.65	99.78	99.78	98.65	98.65	99.78	99.1	97.98	97.51
FIG000124: Ribosomal large subunit pseudouridine synthase D (EC 4.2.1.70)	fig|6666666.157468.peg.514	100	100	100	95.2	95.2	95.2	95.2	95.2	95.2	95.2	95.2	95.2	95.2	95.2	100	100	95.2	95.2	100	99.2	98.4	95.6
Lipid IVA 3-deoxy-D-manno-octulosonic acid transferase (EC 2.4.99.12) [often with (EC 2.4.99.13) also]	fig|6666666.157468.peg.515	100	100	100	96.1	96.1	96.1	96.1	96.1	96.1	96.1	96.1	96.1	96.1	96.1	100	100	96.1	96.1	99.22	97.14	96.62	96.01
Glycyl-tRNA synthetase alpha chain (EC 6.1.1.14)	fig|6666666.157468.peg.518	100	100	100	100	100	100	100	100	100	100	100	100	100	100	100	99.65	100	100	99.65	99.3	98.95	78.21
Phosphoribosylaminoimidazole carboxylase catalytic subunit (EC 4.1.1.21)	fig|6666666.157468.peg.520	100	100	100	98.17	98.17	98.17	98.78	98.78	98.78	98.78	98.78	98.78	98.78	98.78	100	100	98.78	98.78	96.95	98.78	98.17	79.3
Glutamine synthetase type I (EC 6.3.1.2)	fig|6666666.157468.peg.523	100	100	100	99.79	99.79	99.79	99.79	99.79	99.79	99.79	99.58	99.58	99.79	99.79	99.79	99.79	99.79	99.37	99.16	99.79	99.58	89.38
Flagellar basal-body rod protein FlgG	fig|6666666.157468.peg.524	100	100	100	99.62	99.62	99.62	100	100	100	100	100	100	100	100	100	99.62	100	100	100	100	99.24	88.86
Flagellar basal-body rod protein FlgF	fig|6666666.157468.peg.525	100	100	100	99.26	99.26	99.26	99.26	99.26	99.26	99.26	99.26	99.26	99.26	99.26	97.78	98.89	99.26	98.89	98.89	98.89	97.78	63.99
Cell division protein FtsZ (EC 3.4.24.-)	fig|6666666.157468.peg.526	100	100	100	100	100	100	100	100	100	100	100	100	100	100	100	100	100	100	100	100	99.73	87.37
Cell division protein FtsA	fig|6666666.157468.peg.527	100	100	100	100	100	100	99.78	99.78	99.78	99.57	99.78	99.78	99.78	99.57	99.13	99.35	99.78	100	99.35	100	99.35	97.65
Peptidyl-prolyl cis-trans isomerase PpiD (EC 5.2.1.8)	fig|6666666.157468.peg.528	100	100	100	99.4	99.4	99.4	99.4	99.4	99.4	99.4	98.99	98.99	99.4	99.4	98.39	98.38	99.4	99.4	98.59	99.19	97.58	95.94
rRNA small subunit methyltransferase H	fig|6666666.157468.peg.529	100	100	100	97.71	97.71	97.71	98.39	98.39	98.39	98.39	98.39	98.39	98.39	98.06	98.06	98.71	98.39	98.39	98.71	99.03	95.81	92.64
Arginine/ornithine antiporter ArcD	fig|6666666.157468.peg.530	100	100	100	99.36	99.36	99.36	99.36	99.36	99.36	99.36	99.36	99.36	99.36	99.36	99.36	89.42	99.36	99.36	89.42	98.72	82.37	97.48
Arginine/ornithine antiporter ArcD	fig|6666666.157468.peg.531	100	100	100	99.39	99.39	99.39	99.39	99.39	99.39	99.39	99.39	99.39	97.55	99.39	99.39	96.32	99.39	99.39	95.71	99.39	94.48	85.41
Acetate kinase (EC 2.7.2.1)	fig|6666666.157468.peg.534	100	100	100	99.24	99.24	99.24	99.24	99.24	99.24	99.24	99.24	99.24	99.24	98.23	96.21	95.67	99.24	99.24	95.67	98.99	95.2	72.4
Phosphate acetyltransferase (EC 2.3.1.8)	fig|6666666.157468.peg.535	100	100	100	100	100	100	100	100	100	100	97.4	97.4	100	97.2	99.8	97.4	100	97.8	98.27	97.4	97	77.78
Flagellar L-ring protein FlgH	fig|6666666.157468.peg.536	100	100	100	100	100	100	99.57	99.57	99.57	99.57	99.57	99.57	99.14	99.14	98.71	99.57	99.57	100	99.14	99.14	96.98	94.79
1-hydroxy-2-methyl-2-(E)-butenyl 4-diphosphate synthase (EC 1.17.7.1)	fig|6666666.157468.peg.537	100	100	100	99.72	99.72	99.72	99.44	99.44	99.44	99.44	99.72	99.72	99.72	99.44	99.72	99.72	99.72	99.44	98.6	99.44	98.6	92.31
Helicase PriA essential for oriC/DnaA-independent DNA replication	fig|6666666.157468.peg.542	100	100	100	99.03	99.03	99.03	94.65	94.65	94.65	94.65	98.54	98.54	94.65	99.35	98.22	99.51	94.65	99.35	97.41	99.35	96.92	91.3
Excinuclease ABC subunit B	fig|6666666.157468.peg.546	100	100	100	99.24	99.24	99.24	98.02	98.02	98.02	94.22	99.09	99.09	98.02	99.24	99.09	99.24	98.02	99.54	99.09	99.24	98.93	100
Osmosensitive K+ channel histidine kinase KdpD (EC 2.7.3.-)	fig|6666666.157468.peg.547	100	99.76	99.76	98.55	98.55	98.55	92.27	92.27	92.27	92.27	98.62	98.62	92.51	92.51	98.55	98.41	92.51	98.68	98.79	0	0	66.67
Osmosensitive K+ channel histidine kinase KdpD (EC 2.7.3.-)	fig|6666666.157468.peg.548	100	100	100	100	100	100	99.27	99.27	99.27	99.27	99.27	99.27	99.27	99.27	100	97.81	99.27	99.27	100	0	0	89.46
Potassium-transporting ATPase C chain (EC 3.6.3.12) (TC 3.A.3.7.1)	fig|6666666.157468.peg.549	100	100	100	96.53	96.53	96.53	96.61	96.61	96.61	96.61	95.05	95.05	96.55	0	97.52	100	96.83	96.83	97.52	95.05	0	81.09
Potassium-transporting ATPase B chain (EC 3.6.3.12) (TC 3.A.3.7.1)	fig|6666666.157468.peg.550	100	100	100	0	0	0	98.41	98.41	98.41	98.41	96.83	96.83	0	0	0	97.14	96.83	0	0	0	0	98.08
Potassium-transporting ATPase B chain (EC 3.6.3.12) (TC 3.A.3.7.1)	fig|6666666.157468.peg.551	100	100	100	100	100	100	100	100	100	100	99.22	99.22	96.3	96.3	99.26	99.26	96.39	96.3	99.26	32.11	32.1	88.76
Potassium-transporting ATPase B chain (EC 3.6.3.12) (TC 3.A.3.7.1)	fig|6666666.157468.peg.552	100	100	100	98.43	98.43	98.43	97.2	97.2	97.2	97.2	98.31	98.31	98.43	98.43	98.88	97.99	98.43	98.43	98.88	27.92	27.46	89.38
Potassium-transporting ATPase A chain (EC 3.6.3.12) (TC 3.A.3.7.1)	fig|6666666.157468.peg.553	100	100	100	98.08	98.08	98.08	99.38	99.38	99.38	99.38	100	100	96.9	0	98.36	97.67	98.46	97.18	98.08	0	0	86.36
Potassium-transporting ATPase A chain (EC 3.6.3.12) (TC 3.A.3.7.1)	fig|6666666.157468.peg.554	100	100	100	97.96	97.96	97.96	97.96	97.96	97.96	97.96	95.38	95.38	96	0	97.96	97.96	96	96	97.96	0	0	94.92
Potassium-transporting ATPase A chain (EC 3.6.3.12) (TC 3.A.3.7.1)	fig|6666666.157468.peg.555	100	100	100	100	100	100	98.31	98.31	98.31	98.31	100	100	100	0	98.31	98.31	100	100	98.31	0	0	95.49
C4-dicarboxylate transporter DcuB	fig|6666666.157468.peg.557	100	100	100	98.95	98.95	98.95	98.95	98.95	98.95	98.95	98.73	98.73	98.95	98.52	98.73	98.73	98.95	97.26	98.95	98.73	91.84	80.72
RNA polymerase sigma-54 factor RpoN	fig|6666666.157468.peg.558	100	100	100	99.52	99.52	99.52	99.52	99.52	99.52	99.52	99.76	99.76	99.52	99.52	99.76	100	99.52	99.52	99.52	100	99.52	78.92
Lipopolysaccharide ABC transporter, ATP-binding protein LptB	fig|6666666.157468.peg.559	100	100	100	100	100	100	100	100	100	100	100	100	100	100	100	100	100	99.6	100	100	100	77.06
TsaE protein, required for threonylcarbamoyladenosine t(6)A37 formation in tRNA	fig|6666666.157468.peg.560	100	100	100	100	100	100	97.78	97.78	97.78	97.78	97.78	97.78	98.52	97.78	97.78	97.78	98.52	97.78	97.78	100	95.56	77.22
Ribosome-associated heat shock protein implicated in the recycling of the 50S subunit (S4 paralog)	fig|6666666.157468.peg.561	100	100	100	98.94	98.94	98.94	100	100	100	100	100	100	98.94	97.53	100	100	98.94	97.87	100	98.77	98.77	82.73
Argininosuccinate synthase (EC 6.3.4.5)	fig|6666666.157468.peg.562	100	100	100	99.51	99.51	99.51	99.75	99.75	99.75	99.75	99.75	99.75	99.26	99.51	99.75	99.75	99.26	99.51	99.75	99.75	99.26	53.61
LSU ribosomal protein L9p	fig|6666666.157468.peg.563	100	100	100	98.64	98.64	98.64	98.64	98.64	98.64	98.64	98.64	98.64	98.63	98.64	96.6	96.6	98.64	98.64	95.92	98.64	97.96	95.29
ATP-dependent protease HslV (EC 3.4.25.-)	fig|6666666.157468.peg.564	100	100	100	98.89	98.89	98.89	98.89	98.89	98.89	98.89	98.89	98.89	98.89	100	98.89	98.89	100	100	98.89	100	98.33	84.94
ATP-dependent hsl protease ATP-binding subunit HslU	fig|6666666.157468.peg.565	100	100	100	98.86	98.86	98.86	99.09	99.09	99.09	98.2	99.09	99.09	99.09	99.32	99.09	99.09	99.32	99.32	99.32	99.32	98.41	93.93
GTP-binding protein Era	fig|6666666.157468.peg.566	100	100	100	97.94	97.94	97.94	97.25	97.25	97.25	97.25	97.25	97.25	97.25	98.97	97.59	97.59	98.63	98.97	97.59	97.59	94.16	53.61
Di-/tripeptide transporter	fig|6666666.157468.peg.569	100	100	100	97.73	97.73	97.73	100	100	100	100	100	100	96.71	0	98.58	97.7	96.71	96.71	96.6	91.55	94.87	89.15
Di-/tripeptide transporter	fig|6666666.157468.peg.570	100	100	100	97.53	97.53	97.53	100	100	100	100	100	100	98.51	0	97.53	98.77	98.51	98.51	96.3	63.89	96.77	96.79
Di-/tripeptide transporter	fig|6666666.157468.peg.571	100	100	100	99.42	99.42	99.42	100	100	100	100	100	100	99.42	0	100	98.36	99.42	99.42	98.45	99.61	98.45	0
Xaa-Pro aminopeptidase (EC 3.4.11.9)	fig|6666666.157468.peg.572	100	100	100	99.5	99.5	99.5	99.83	99.83	99.83	99.83	99.83	99.83	99.33	98.99	99.16	98.49	98.99	98.99	99.33	99.66	97.99	75.63
Cell division protein FtsI [Peptidoglycan synthetase] (EC 2.4.1.129)	fig|6666666.157468.peg.573	100	100	100	99.67	99.67	99.67	99.67	99.67	99.67	99.28	99.67	99.67	99.33	99.33	99.33	99.5	99.33	99.33	99.33	99.33	98.34	0
membrane protein	fig|6666666.157468.peg.574	100	100	100	96.61	96.61	96.61	99.15	99.15	99.15	99.15	99.15	99.15	98.31	99.15	99.15	99.15	99.15	99.15	99.15	99.15	100	94.1
GTP-binding protein EngB	fig|6666666.157468.peg.575	100	100	100	98.48	98.48	98.48	99.49	99.49	99.49	99.49	99.49	99.49	97.98	98.99	98.99	98.48	98.99	98.99	98.48	99.49	96.98	95.59
OstA family organic solvent tolerance protein	fig|6666666.157468.peg.576	100	100	100	99.35	99.35	99.35	98.69	98.69	98.69	98.69	98.69	98.69	98.69	98.69	98.69	98.69	98.69	98.69	100	99.35	97.39	90.62
3-deoxy-D-manno-octulosonate 8-phosphate phosphatase (EC 3.1.3.45)	fig|6666666.157468.peg.578	100	100	100	98.77	98.77	98.77	98.15	98.15	98.15	98.15	98.15	98.15	97.53	97.53	98.15	98.15	97.53	95.09	98.15	98.15	98.15	86.81
Rare lipoprotein A precursor	fig|6666666.157468.peg.579	100	100	100	99.64	99.64	99.64	99.64	99.64	99.64	99.64	99.64	99.64	99.64	99.64	99.64	99.27	99.64	99.64	99.64	99.64	99.64	92.89
Membrane-bound lytic murein transglycosylase D precursor (EC 3.2.1.-)	fig|6666666.157468.peg.580	100	100	100	99.73	99.73	99.73	99.73	99.73	99.73	99.73	99.73	99.73	99.73	99.73	99.46	100	99.73	99.73	99.73	99.73	98.12	85.96
DNA repair protein RecN	fig|6666666.157468.peg.583	100	100	100	98.8	98.8	98.8	100	100	100	100	99	99	99.4	99.2	99.2	99.2	99.4	99.2	99.2	98.8	98.2	92.99
NAD kinase (EC 2.7.1.23)	fig|6666666.157468.peg.584	100	100	100	98.95	98.95	98.95	100	100	100	100	98.95	98.95	97.9	97.9	100	100	97.9	98.95	100	98.95	98.95	89.88
Aspartyl-tRNA synthetase (EC 6.1.1.12) @ Aspartyl-tRNA(Asn) synthetase (EC 6.1.1.23)	fig|6666666.157468.peg.585	100	100	100	98.8	98.8	98.8	100	100	100	100	98.97	98.97	99.14	98.97	99.83	100	99.14	98.63	100	98.97	98.63	62.06
Adenylate kinase (EC 2.7.4.3)	fig|6666666.157468.peg.586	100	100	100	98.96	98.96	98.96	100	100	100	100	98.96	98.96	98.96	98.96	100	100	98.96	98.44	100	98.44	98.96	99.69
Inorganic pyrophosphatase (EC 3.6.1.1)	fig|6666666.157468.peg.587	100	100	100	98.26	98.26	98.26	100	100	100	100	98.26	98.26	98.26	98.26	100	100	98.26	98.84	100	98.26	97.67	0
Peptide methionine sulfoxide reductase MsrA (EC 1.8.4.11)	fig|6666666.157468.peg.588	100	100	100	99.39	99.39	99.39	100	100	100	100	98.18	98.18	98.18	98.18	100	100	98.18	95.76	100	95.76	95.76	87.84
Ribosomal RNA small subunit methyltransferase B (EC 2.1.1.-)	fig|6666666.157468.peg.589	100	100	100	98.31	98.31	98.31	100	100	100	100	99.32	99.32	99.32	99.28	99.64	99.66	99.32	98.29	99.66	97.49	0	75.55
Rossmann fold nucleotide-binding protein Smf possibly involved in DNA uptake	fig|6666666.157468.peg.591	100	100	100	97.67	97.67	97.67	99.22	99.22	99.22	99.22	97.66	97.66	97.66	98.44	99.61	98.44	97.66	97.66	99.61	97.27	98.05	78.98
Ketol-acid reductoisomerase (EC 1.1.1.86)	fig|6666666.157468.peg.593	100	100	100	97.65	97.65	97.65	100	100	100	99.3	97.94	97.94	97.94	97.94	100	99.41	97.94	98.24	100	98.24	97.65	75
3'-to-5' exoribonuclease RNase R	fig|6666666.157468.peg.594	100	100	100	97.98	97.98	97.98	98.76	98.76	98.76	98.76	97.98	97.98	97.98	98.14	99.84	98.6	97.98	97.98	98.76	97.83	97.05	83.89
[NiFe] hydrogenase nickel incorporation protein HypA	fig|6666666.157468.peg.597	100	100	100	99.12	99.12	99.12	100	100	100	100	99.12	99.12	99.12	98.25	99.12	99.12	97.37	97.37	99.12	100	94.74	93.53
[NiFe] hydrogenase metallocenter assembly protein HypE	fig|6666666.157468.peg.598	100	100	100	98.46	98.46	98.46	100	100	100	100	100	100	100	98.77	99.38	98.77	98.77	98.77	98.77	100	97.53	94.21
[NiFe] hydrogenase metallocenter assembly protein HypD	fig|6666666.157468.peg.599	100	100	100	98.62	98.62	98.62	99.17	99.17	99.17	99.17	98.9	98.9	98.9	99.45	98.9	99.72	99.45	99.45	99.72	99.17	97.25	95.4
[NiFe] hydrogenase metallocenter assembly protein HypC	fig|6666666.157468.peg.600	100	100	100	100	100	100	100	100	100	100	100	100	100	100	100	98.92	100	100	98.92	100	98.92	81.61
[NiFe] hydrogenase nickel incorporation-associated protein HypB	fig|6666666.157468.peg.601	100	100	100	97.17	97.17	97.17	98.79	98.79	98.79	98.79	97.17	97.17	97.17	99.19	97.98	97.17	99.19	100	97.17	98.79	95.95	87.79
[NiFe] hydrogenase metallocenter assembly protein HypF	fig|6666666.157468.peg.602	100	100	100	98.9	98.9	98.9	98.63	98.63	98.63	98.63	98.35	98.35	98.49	97.94	98.63	98.77	98.08	99.18	98.77	98.9	96.57	89.44
Protein hydE	fig|6666666.157468.peg.603	100	100	100	99.01	99.01	99.01	98.62	98.62	98.62	98.62	97.04	97.04	98.02	99.41	98.22	97.04	99.41	98.81	96.64	97.83	95.65	78.97
Multi antimicrobial extrusion protein (Na(+)/drug antiporter), MATE family of MDR efflux pumps	fig|6666666.157468.peg.605	100	100	100	99.77	99.77	99.77	99.54	99.54	99.54	99.54	98.86	98.86	98.86	99.09	99.54	98.63	98.86	99.09	98.86	99.32	97.03	87.72
Phosphate transport ATP-binding protein PstB (TC 3.A.1.7.1)	fig|6666666.157468.peg.608	100	100	100	99.19	99.19	99.19	99.59	99.59	99.59	99.59	99.59	99.59	99.59	99.19	99.59	99.59	99.59	99.59	99.59	99.59	100	92.38
Phosphate transport system permease protein PstA (TC 3.A.1.7.1)	fig|6666666.157468.peg.609	100	100	100	99.17	99.17	99.17	98.9	98.9	98.9	98.9	99.45	99.45	99.45	99.45	99.17	99.45	98.9	98.34	98.62	99.45	98.62	85.71
Phosphate transport system permease protein PstC (TC 3.A.1.7.1)	fig|6666666.157468.peg.610	100	100	100	100	100	100	100	100	100	100	100	100	100	100	100	100	100	99.34	100	100	98.36	0
Phosphate ABC transporter, periplasmic phosphate-binding protein PstS (TC 3.A.1.7.1)	fig|6666666.157468.peg.611	100	100	100	98.49	98.49	98.49	99.4	99.4	99.4	99.4	99.09	99.09	99.09	99.09	99.09	99.4	98.49	93.66	99.09	93.66	98.79	73.87
Nonheme iron-containing ferritin	fig|6666666.157468.peg.612	100	100	100	98.8	98.8	98.8	100	100	100	100	100	100	100	100	100	100	100	100	100	100	98.8	89.83
Type I secretion system, outer membrane component LapE	fig|6666666.157468.peg.616	100	100	100	98.9	98.9	98.9	98.25	98.25	98.25	98.25	98.68	98.68	98.68	98.68	97.37	97.81	98.68	99.34	97.59	98.9	97.59	90.36
Macrolide export ATP-binding/permease protein MacB (EC 3.6.3.-)	fig|6666666.157468.peg.617	100	100	100	100	100	100	99.69	99.69	99.69	99.69	99.84	99.84	99.84	99.84	99.06	98.91	99.84	100	99.06	99.84	98.13	49.3
Macrolide-specific efflux protein MacA	fig|6666666.157468.peg.618	100	100	100	95.38	95.38	95.38	98.72	98.72	98.72	98.72	99.74	99.74	99.74	99.74	98.21	97.95	99.74	99.74	97.95	99.74	96.92	89.39
N-acetyl-L,L-diaminopimelate deacetylase homolog (EC 3.5.1.18)	fig|6666666.157468.peg.619	100	100	100	98.74	98.74	98.74	99.49	99.49	99.49	99.32	100	100	100	100	98.23	98.23	100	100	98.23	100	98.48	99.28
UDP-galactose-lipid carrier transferase (EC 2.-.-.-)	fig|6666666.157468.peg.620	100	100	100	100	100	100	95.18	95.18	95.18	95.18	100	100	100	100	100	100	100	100	100	100	87.95	93.8
UDP-galactose-lipid carrier transferase (EC 2.-.-.-)	fig|6666666.157468.peg.621	100	100	100	98.54	98.54	98.54	95.33	95.33	95.33	95.33	98.81	98.81	98.81	98.54	98.4	98.54	98.81	98.54	98.54	97.81	87.1	86.53
Cytochrome c-type biogenesis protein DsbD, protein-disulfide reductase (EC 1.8.1.8)	fig|6666666.157468.peg.622	100	100	100	99.82	99.82	99.82	99.12	99.12	99.12	98.41	100	100	100	100	99.12	99.12	100	100	99.12	100	96.83	0
Arginine/ornithine antiporter ArcD	fig|6666666.157468.peg.627	100	100	100	100	100	100	99.38	99.38	99.38	99.29	100	100	100	100	99.17	99.58	100	100	99.17	100	98.96	85.22
Fructose-bisphosphate aldolase class II (EC 4.1.2.13)	fig|6666666.157468.peg.628	100	100	100	100	100	100	99.72	99.72	99.72	99.72	100	100	100	100	99.72	99.72	100	100	99.72	100	98.59	88.57
Foldase protein PrsA precursor (EC 5.2.1.8)	fig|6666666.157468.peg.629	100	100	100	100	100	100	99.27	99.27	99.27	99.27	100	100	99.63	100	98.9	100	100	100	98.9	100	98.9	98.23
Endonuclease III (EC 4.2.99.18)	fig|6666666.157468.peg.630	100	100	100	100	100	100	99.52	99.52	99.52	99.52	100	100	100	100	98.56	100	100	100	98.56	100	99.52	83.51
DNA/RNA non-specific endonuclease	fig|6666666.157468.peg.631	100	100	100	99.54	99.54	99.54	99.07	99.07	99.07	99.07	100	100	100	100	95.83	97.22	100	100	95.83	100	94.44	92.59
Arginine/ornithine antiporter ArcD	fig|6666666.157468.peg.632	100	100	100	98.1	98.1	98.1	100	100	100	100	100	100	100	100	100	100	100	100	100	100	98.57	85.25
tRNA (uridine-5-oxyacetic acid methyl ester) 34 synthase	fig|6666666.157468.peg.635	100	100	100	99.57	99.57	99.57	99.57	99.57	99.57	99.57	99.57	99.57	99.57	99.57	98.3	99.57	99.57	99.57	98.72	99.57	98.72	93.14
Riboflavin kinase (EC 2.7.1.26) / FMN adenylyltransferase (EC 2.7.7.2)	fig|6666666.157468.peg.636	100	100	100	99.65	99.65	99.65	99.29	99.29	99.29	99.29	95.05	95.05	95.05	95.05	94.35	99.29	95.05	95.05	99.29	98.94	95.05	99.67
RNA binding methyltransferase FtsJ like	fig|6666666.157468.peg.637	100	100	100	99.6	99.6	99.6	100	100	100	100	98.81	98.81	98.81	98.81	94.86	100	98.81	98.81	99.6	100	92.89	97.04
membrane protein	fig|6666666.157468.peg.638	100	100	100	98.8	99.1	99.1	99.4	99.4	99.7	99.7	99.1	99.1	99.1	98.8	96.39	98.8	98.8	98.8	98.8	99.7	82.57	77.5
DNA ligase (EC 6.5.1.2)	fig|6666666.157468.peg.639	100	100	100	98.45	98.45	98.45	98.45	98.45	98.45	98.45	99.69	99.69	99.69	99.69	97.99	98.76	99.69	99.69	98.45	99.54	97.37	90.2
Alternative dihydrofolate reductase 2 / Dihydropteroate synthase (EC 2.5.1.15)	fig|6666666.157468.peg.640	100	100	100	98.42	98.42	98.42	98.68	98.68	98.68	98.68	99.74	99.74	99.74	99.74	99.21	99.21	99.74	99.47	99.21	100	96.32	98.92
DNA poymerase III subunit delta' (EC 2.7.7.7)	fig|6666666.157468.peg.641	100	100	100	99.5	99.5	99.5	98.99	98.99	98.99	98.99	100	100	100	100	99.5	99.5	100	100	99.5	98.49	97.49	86.83
DNA replication regulator family	fig|6666666.157468.peg.642	100	100	100	100	100	100	100	100	100	0	100	100	100	100	98.88	98.88	100	100	98.31	99.44	99.44	94.52
Aspartokinase (EC 2.7.2.4)	fig|6666666.157468.peg.643	100	100	100	99.5	99.5	99.5	99.5	99.5	99.5	99.5	99.75	99.75	99.75	99.5	99.25	99.25	99.75	99.75	99.25	98.25	97	89.44
Adenosine (5')-pentaphospho-(5'')-adenosine pyrophosphohydrolase (EC 3.6.1.-)	fig|6666666.157468.peg.644	100	100	100	100	100	100	100	100	100	100	98.08	98.08	98.08	98.08	98.08	98.08	98.08	98.08	98.08	98.08	96.79	92.62
Twin-arginine translocation protein TatB	fig|6666666.157468.peg.646	100	100	100	100	100	100	100	100	100	0	100	100	100	100	97.04	97.04	100	100	97.04	100	95.56	83.45
Twin-arginine translocation protein TatC	fig|6666666.157468.peg.647	100	100	100	99.59	99.59	99.59	97.96	97.96	97.96	97.96	97.96	97.96	97.96	97.96	98.37	98.78	97.96	97.96	98.37	98.37	96.33	79.32
S-adenosylmethionine:tRNA ribosyltransferase-isomerase (EC 5.-.-.-)	fig|6666666.157468.peg.648	100	100	100	99.42	99.42	99.42	98.25	98.25	98.25	98.25	99.12	99.12	99.12	99.12	97.08	97.08	99.12	99.12	97.08	98.54	97.08	83.91
UDP-3-O-[3-hydroxymyristoyl] glucosamine N-acyltransferase (EC 2.3.1.191)	fig|6666666.157468.peg.649	100	100	100	99.69	99.69	99.69	99.69	99.69	99.69	99.69	100	100	100	100	99.69	99.69	100	100	99.69	100	97.79	92.76
Acetolactate synthase small subunit (EC 2.2.1.6)	fig|6666666.157468.peg.650	100	100	100	100	100	100	100	100	100	100	100	100	100	100	100	100	100	100	100	100	98.7	77.33
Acetolactate synthase large subunit (EC 2.2.1.6)	fig|6666666.157468.peg.651	100	100	100	99.29	99.29	99.29	99.65	99.65	99.65	99.65	99.65	99.65	99.65	99.65	98.94	99.12	99.65	99.65	98.94	99.82	98.06	95.8
Transamidase GatB domain protein	fig|6666666.157468.peg.652	100	100	100	100	100	100	100	100	100	100	99.32	99.32	99.32	99.32	99.32	99.32	99.32	100	99.32	100	91.8	93.98
3,4-dihydroxy-2-butanone 4-phosphate synthase (EC 4.1.99.12) / GTP cyclohydrolase II (EC 3.5.4.25)	fig|6666666.157468.peg.653	100	100	100	99.71	99.71	99.71	99.71	99.71	99.71	99.71	99.71	99.71	99.71	99.71	99.12	99.12	99.71	99.71	99.12	99.71	95.87	83.54
Replicative DNA helicase (EC 3.6.1.-)	fig|6666666.157468.peg.662	100	100	100	99.56	99.56	99.56	100	100	100	100	99.34	99.34	99.34	99.56	99.34	98.91	99.56	99.56	99.34	99.56	95.19	92.64
Multi antimicrobial extrusion protein (Na(+)/drug antiporter), MATE family of MDR efflux pumps	fig|6666666.157468.peg.664	100	100	100	98.71	98.71	98.71	100	100	100	100	98.01	98.01	98.01	98.01	97.76	98.01	98.01	98.01	99	0	0	94.12
Multi antimicrobial extrusion protein (Na(+)/drug antiporter), MATE family of MDR efflux pumps	fig|6666666.157468.peg.665	100	100	100	94.59	94.59	94.59	94.59	94.59	94.59	94.59	0	0	0	0	0	0	0	0	0	0	0	90.5
Thioredoxin reductase (EC 1.8.1.9)	fig|6666666.157468.peg.666	100	100	100	100	100	100	100	100	100	100	100	100	100	100	99.68	99.04	100	100	100	99.04	98.07	95.26
Gamma-glutamyl phosphate reductase (EC 1.2.1.41)	fig|6666666.157468.peg.667	100	100	100	99.27	99.27	99.27	99.27	99.27	99.27	99.27	99.27	99.27	99.27	99.27	99.02	99.27	99.27	99.27	97.8	99.51	59.52	88.12
Arginine/ornithine antiporter ArcD	fig|6666666.157468.peg.670	100	100	100	100	100	100	99.07	99.07	99.07	99.07	99.07	99.07	99.07	99.07	98.83	98.6	99.07	99.07	98.83	98.6	0	0
FIG001614: Membrane protein	fig|6666666.157468.peg.672	100	100	100	100	100	100	100	100	100	100	100	100	100	100	99.37	99.37	100	99.68	99.37	99.68	98.42	98.56
FIG015373: Membrane protein	fig|6666666.157468.peg.673	100	100	100	100	100	100	100	100	100	100	100	100	100	100	100	99.57	100	100	100	100	98.26	84.36
Translation elongation factor P	fig|6666666.157468.peg.674	100	100	100	98.41	98.41	98.41	98.41	98.41	98.41	98.41	100	100	98.41	98.41	98.41	98.41	98.41	98.41	98.41	98.41	98.41	94.76
Flagellar biosynthesis protein FliS	fig|6666666.157468.peg.676	100	100	100	95.31	95.31	95.31	93.75	93.75	93.75	93.75	100	100	93.75	93.75	94.53	95.31	93.75	93.75	94.53	93.75	96.09	87.9
Flagellar hook-associated protein FliD	fig|6666666.157468.peg.677	100	100	100	94.86	94.86	94.86	94.55	94.55	94.55	94.55	99.07	99.07	95.33	94.55	99.38	94.55	95.33	94.55	97.51	95.79	92.88	85.36
UbiD family decarboxylase associated with menaquinone via futalosine	fig|6666666.157468.peg.679	100	100	100	98.33	98.33	98.33	99.67	99.67	99.67	99.67	99.67	99.67	99.67	99	99.17	98.17	99.67	99.17	99	100	97	92.56
Porphobilinogen deaminase (EC 2.5.1.61)	fig|6666666.157468.peg.680	100	100	100	98.7	98.7	98.7	99.67	99.67	99.67	99.67	99.67	99.67	99.67	99.67	100	99.67	99.67	99.67	99.67	100	97.72	86.81
Prolyl-tRNA synthetase (EC 6.1.1.15), bacterial type	fig|6666666.157468.peg.682	100	100	100	98.24	98.24	98.24	98.59	98.59	98.59	98.59	98.59	98.59	98.59	98.42	98.42	98.77	98.59	98.59	98.59	99.82	97.89	77.1
Glutamyl-tRNA reductase (EC 1.2.1.70)	fig|6666666.157468.peg.683	100	100	100	99.54	99.54	99.54	100	100	100	100	100	100	100	99.77	99.77	100	100	99.77	99.54	99.77	97.92	89.3
Octaprenyl diphosphate synthase (EC 2.5.1.90) / Dimethylallyltransferase (EC 2.5.1.1) / (2E,6E)-farnesyl diphosphate synthase (EC 2.5.1.10) / Geranylgeranyl diphosphate synthase (EC 2.5.1.29)	fig|6666666.157468.peg.684	100	100	100	100	100	100	99.66	99.66	99.66	99.66	99.66	99.66	99.66	99.66	99.66	99.66	99.66	99.66	99.33	99.33	98.32	92.8
2-oxoglutarate oxidoreductase, gamma subunit (EC 1.2.7.3)	fig|6666666.157468.peg.687	100	100	100	99.46	99.46	99.46	99.46	99.46	99.46	99.46	99.46	99.46	99.46	100	99.46	98.91	99.46	99.46	99.46	99.46	100	86.1
2-oxoglutarate oxidoreductase, beta subunit (EC 1.2.7.3)	fig|6666666.157468.peg.688	100	100	100	100	100	100	100	100	100	100	100	100	100	100	98.93	100	100	100	98.93	100	99.64	86.21
2-oxoglutarate oxidoreductase, alpha subunit (EC 1.2.7.3)	fig|6666666.157468.peg.689	100	100	100	99.73	99.73	99.73	100	100	100	100	100	100	100	100	97.06	99.73	100	100	97.06	100	98.93	88.89
Succinyl-CoA ligase [ADP-forming] alpha chain (EC 6.2.1.5)	fig|6666666.157468.peg.691	100	100	100	99.31	99.31	99.31	100	100	100	100	100	100	100	99.65	100	100	100	99.65	100	100	98.96	94.19
Succinyl-CoA ligase [ADP-forming] beta chain (EC 6.2.1.5)	fig|6666666.157468.peg.692	100	100	100	99.22	99.22	99.22	99.22	99.22	99.22	99.22	99.22	99.22	99.22	99.22	98.71	99.74	99.22	99.22	99.48	99.22	98.97	94.96
Malate dehydrogenase (EC 1.1.1.37)	fig|6666666.157468.peg.693	100	100	100	99.33	99.33	99.33	99.33	99.33	99.33	99.33	99.33	99.33	99.33	99.33	99.67	99.67	99.33	99.33	99.67	99.33	98.67	92.25
Isocitrate dehydrogenase [NADP] (EC 1.1.1.42); Monomeric isocitrate dehydrogenase [NADP] (EC 1.1.1.42)	fig|6666666.157468.peg.694	100	100	100	99.32	99.32	99.32	99.32	99.32	99.32	99.32	99.32	99.32	99.32	99.32	99.59	99.18	99.32	99.32	99.73	99.46	97.96	83.87
FIG004453: protein YceG like	fig|6666666.157468.peg.696	100	100	100	100	100	100	100	100	100	0	99.23	99.23	100	100	98.84	98.84	100	100	98.84	99.61	96.53	81.2
Flagellar basal-body rod protein FlgB	fig|6666666.157468.peg.697	100	100	100	97.2	97.2	97.2	98.6	98.6	98.6	98.6	99.3	99.3	97.2	97.2	97.9	97.9	97.2	97.2	97.9	99.3	97.2	85.95
Flagellar basal-body rod protein FlgC	fig|6666666.157468.peg.698	100	100	100	99.39	99.39	99.39	99.39	99.39	99.39	99.39	99.39	99.39	98.78	98.78	98.78	99.39	98.78	98.78	98.78	98.78	97.56	87.26
Flagellar hook-basal body complex protein FliE	fig|6666666.157468.peg.699	100	100	100	100	100	100	100	100	100	100	100	100	98.98	98.98	100	98.98	98.98	98.98	100	100	94.9	94.63
Cell division protein FtsI [Peptidoglycan synthetase] (EC 2.4.1.129)	fig|6666666.157468.peg.700	100	100	100	100	100	100	99.83	99.83	99.83	99.83	100	100	100	0	99.66	99.5	100	100	99.66	100	98.49	73.4
Sodium-dependent phosphate transporter	fig|6666666.157468.peg.701	100	100	100	99.08	99.08	99.08	99.57	99.57	99.57	99.57	98.9	98.9	99.57	99.57	98.9	98.53	99.57	99.57	98.71	98.71	94.89	90.22
Arginine/ornithine antiporter ArcD	fig|6666666.157468.peg.702	100	100	100	94.44	94.44	94.44	100	100	100	100	95.83	95.83	100	100	95.83	95.14	100	100	95.83	95.83	97.92	86.37
Chaperone protein HtpG	fig|6666666.157468.peg.704	100	100	100	99.67	99.67	99.67	99.34	99.34	99.34	99.34	99.51	99.51	99.34	99.34	99.67	100	99.34	99.18	99.84	99.67	98.85	94.97
CrcB protein	fig|6666666.157468.peg.705	100	100	100	98.06	98.06	98.06	98.06	98.06	98.06	98.06	95.15	95.15	98.06	98.06	98.06	96.12	98.06	98.06	96.12	95.15	91.53	79.87
1-acyl-sn-glycerol-3-phosphate acyltransferase (EC 2.3.1.51)	fig|6666666.157468.peg.706	100	100	100	100	100	100	99.57	99.57	99.57	99.57	99.13	99.13	99.57	99.57	99.57	97.83	99.57	99.57	97.83	99.13	93.36	93.02
Phosphoribosylformylglycinamidine synthase, glutamine amidotransferase subunit (EC 6.3.5.3)	fig|6666666.157468.peg.708	100	100	100	99.53	99.53	99.53	98.6	98.6	98.6	98.6	95.79	95.79	98.6	98.6	99.07	97.66	98.6	98.6	97.66	95.79	97.66	94.12
Phosphoribosylformylglycinamidine synthase, PurS subunit (EC 6.3.5.3)	fig|6666666.157468.peg.709	100	100	100	98.77	98.77	98.77	98.77	98.77	98.77	98.77	98.77	98.77	98.77	98.77	100	98.77	98.77	98.77	100	98.77	98.77	96.15
Phosphoribosylaminoimidazole-succinocarboxamide synthase (EC 6.3.2.6)	fig|6666666.157468.peg.710	100	100	100	99.58	99.58	99.58	99.58	99.58	99.58	99.58	99.58	99.58	99.58	99.58	100	100	99.58	99.58	99.58	99.58	97.88	95.86
Carboxyl-terminal protease (EC 3.4.21.102)	fig|6666666.157468.peg.711	100	100	100	100	100	100	99.77	99.77	99.77	99.77	100	100	99.54	99.77	98.41	99.77	99.77	100	99.77	99.32	97.04	93.21
ClpB protein	fig|6666666.157468.peg.713	100	100	100	99.42	99.42	99.42	99.53	99.53	99.53	99.53	99.88	99.88	99.53	99.53	99.3	100	99.53	99.42	100	99.3	98.01	87.78
Multimodular transpeptidase-transglycosylase (EC 2.4.1.129) (EC 3.4.-.-)	fig|6666666.157468.peg.714	100	100	100	99.69	99.69	99.69	99.53	99.53	99.53	99.53	99.84	99.84	99.38	99.38	99.69	99.38	99.38	99.38	99.53	99.69	97.51	86.04
Septum formation protein Maf	fig|6666666.157468.peg.715	100	100	100	99.45	99.45	99.45	99.45	99.45	99.45	99.45	99.45	99.45	99.45	99.45	99.45	99.45	99.45	99.45	99.45	99.45	94.54	93.92
Alanyl-tRNA synthetase (EC 6.1.1.7)	fig|6666666.157468.peg.716	100	100	100	99.41	99.41	99.41	98.57	98.57	98.57	99.3	100	100	99.76	99.76	98.69	98.69	99.76	99.76	98.57	99.88	97.62	91.07
Cystathionine beta-lyase, type II (EC 4.4.1.8)	fig|6666666.157468.peg.717	100	100	100	98.88	98.88	98.88	98.32	98.32	98.32	98.32	99.72	99.72	98.04	98.04	98.32	98.32	98.04	98.04	98.32	100	94.96	94.96
Ferrochelatase, protoheme ferro-lyase (EC 4.99.1.1)	fig|6666666.157468.peg.719	100	100	100	97.36	97.36	97.36	97.36	97.36	97.36	97.36	97.36	97.36	97.36	97.36	97.97	99.34	97.36	97.36	97.3	97.69	95.38	88.99
Ammonium transporter	fig|6666666.157468.peg.720	100	100	100	95.07	94.81	95.07	94.81	95.07	95.07	94.81	95.83	95.83	95.12	0	0	99.76	95.83	95.26	0	0	96.49	73.38
Selenophosphate-dependent tRNA 2-selenouridine synthase	fig|6666666.157468.peg.721	100	100	100	99.4	99.4	99.4	97.59	97.59	97.59	97.59	99.1	99.1	99.1	99.1	96.64	100	99.1	99.1	96.64	100	96.69	71.33
HIT family protein	fig|6666666.157468.peg.722	100	100	100	100	100	100	96.89	96.89	96.89	96.89	99.38	99.38	99.38	99.38	96.89	100	99.38	99.38	96.89	100	97.52	88.16
Indole-3-glycerol phosphate synthase (EC 4.1.1.48)	fig|6666666.157468.peg.723	100	100	100	100	100	100	99.22	99.22	99.22	99.22	100	100	100	100	99.22	100	100	99.61	98.84	100	98.84	98.77
tRNA (adenine37-N(6))-methyltransferase TrmN6 (EC 2.1.1.223)	fig|6666666.157468.peg.726	100	100	100	97	97	97	97	97	97	97	97	97	97	97	98.28	96.57	97	97	98.28	97	94.42	83.44
Translation elongation factor G	fig|6666666.157468.peg.728	100	100	100	99.86	99.86	99.86	99.86	99.86	99.86	99.86	99.71	99.71	99.86	99.86	99.71	100	99.86	99.86	99.86	99.86	99.57	81.33
SSU ribosomal protein S7p (S5e)	fig|6666666.157468.peg.729	100	100	100	100	100	100	100	100	100	100	100	100	100	100	100	100	100	100	100	100	100	0
SSU ribosomal protein S12p (S23e)	fig|6666666.157468.peg.730	100	100	100	100	100	100	100	100	100	100	100	100	100	100	100	100	100	100	100	100	100	94.96
Aldehyde dehydrogenase A (EC 1.2.1.22) / Glycolaldehyde dehydrogenase (EC 1.2.1.21)	fig|6666666.157468.peg.731	100	100	100	28.89	28.89	100	99.16	99.16	99.16	99.16	97.96	97.96	96.45	97.96	28.89	28.89	96.45	97.96	28.89	96.45	97.91	91.58
Fucose permease	fig|6666666.157468.peg.734	100	100	100	0	0	0	98.8	98.8	98.8	98.56	98.8	98.8	98.8	98.8	0	0	98.8	98.8	0	98.8	98.56	93.43
MFS Superfamily tartrate transporter	fig|6666666.157468.peg.736	100	100	100	0	0	0	99.77	99.77	99.77	99.77	100	100	99.77	100	0	0	99.77	100	0	99.77	97.88	87.47
Altronate dehydratase (EC 4.2.1.7)	fig|6666666.157468.peg.737	100	100	100	0	0	0	99.74	99.74	99.74	99.74	99.74	99.74	99.74	98.97	0	0	99.74	99.74	0	0	97.42	94.75
Altronate dehydratase (EC 4.2.1.7)	fig|6666666.157468.peg.738	100	100	100	0	0	0	98.85	98.85	98.85	98.85	100	100	98.85	100	0	0	98.85	98.85	0	0	97.7	88.03
Transcriptional regulator, IclR family	fig|6666666.157468.peg.740	100	100	100	0	0	0	100	100	100	100	100	100	100	100	0	0	100	100	0	99.6	98.81	92.22
DNA-directed RNA polymerase beta' subunit (EC 2.7.7.6)	fig|6666666.157468.peg.741	100	100	100	99.87	99.87	99.87	100	100	100	100	99.87	99.87	100	100	99.6	99.74	100	100	99.6	99.93	99.67	78.79
DNA-directed RNA polymerase beta subunit (EC 2.7.7.6)	fig|6666666.157468.peg.742	100	100	100	99.85	99.85	99.85	99.85	99.85	99.85	99.85	99.85	99.85	99.85	99.93	99.56	99.56	99.85	99.93	99.49	100	99.13	75.84
LSU ribosomal protein L7/L12 (P1/P2)	fig|6666666.157468.peg.743	100	100	100	100	100	100	99.2	99.2	99.2	99.2	97.6	97.6	97.6	97.6	99.2	99.2	97.6	97.6	99.2	100	98.4	68.65
LSU ribosomal protein L10p (P0)	fig|6666666.157468.peg.744	100	100	100	100	100	100	99.37	99.37	99.37	99.37	99.37	99.37	99.37	99.37	99.37	98.74	99.37	99.37	100	100	98.74	100
LSU ribosomal protein L1p (L10Ae)	fig|6666666.157468.peg.745	100	100	100	100	100	100	100	100	100	100	100	100	100	100	100	100	100	100	100	100	100	72.68
LSU ribosomal protein L11p (L12e)	fig|6666666.157468.peg.746	100	100	100	100	100	100	100	100	100	100	100	100	100	100	100	100	100	100	100	100	100	0
Transcription antitermination protein NusG	fig|6666666.157468.peg.747	100	100	100	100	100	100	100	100	100	100	100	100	100	100	100	100	100	100	100	100	99.44	92.19
Preprotein translocase subunit SecE (TC 3.A.5.1.1)	fig|6666666.157468.peg.748	100	100	100	98.31	98.31	98.31	96.61	96.61	96.61	96.61	98.31	98.31	98.31	98.31	98.31	98.31	98.31	98.31	98.31	98.31	98.31	79.32
LSU ribosomal protein L33p	fig|6666666.157468.peg.749	100	100	100	100	100	100	100	100	100	100	100	100	100	100	100	100	100	100	100	100	98.08	85.86
Translation elongation factor Tu	fig|6666666.157468.peg.750	100	100	100	100	100	100	100	100	100	100	100	100	100	100	100	100	100	100	99.75	100	100	93.94
Methionine ABC transporter ATP-binding protein	fig|6666666.157468.peg.751	100	100	100	98.78	98.78	98.78	99.18	99.18	99.18	99.18	99.18	99.18	99.18	99.18	98.78	98.37	99.18	99.18	99.18	100	96.33	84.35
Amino-acid ABC transporter integral membrane protein	fig|6666666.157468.peg.752	100	100	100	99.54	99.54	99.54	98.62	98.62	98.62	100	98.62	98.62	98.62	98.62	97.25	97.25	98.17	98.62	100	98.62	97.25	100
Amino-acid ABC transporter integral membrane protein	fig|6666666.157468.peg.753	100	100	100	100	100	100	99.14	99.14	99.14	98.71	99.14	99.14	99.14	99.14	98.28	98.28	99.14	98.71	99.57	100	98.28	88.77
ATP-dependent DNA helicase RecG (EC 3.6.1.-)	fig|6666666.157468.peg.756	100	100	100	97.36	97.36	97.36	100	100	100	100	100	100	100	100	98.85	98.02	100	100	97.53	97.36	97.36	91.35
Zinc protease-like protein	fig|6666666.157468.peg.757	100	100	100	97.78	97.78	97.78	100	100	100	100	100	100	100	100	100	99.26	100	100	98.03	98.03	96.55	0
Menaquinone via futalosine step 3	fig|6666666.157468.peg.758	100	100	100	99.71	99.71	99.71	100	100	100	100	100	100	100	100	99.71	99.43	100	100	99.43	99.14	98.56	94.56
FIG00732228: membrane protein	fig|6666666.157468.peg.759	100	100	100	98.68	98.68	98.68	100	100	100	100	100	100	100	100	99.75	99.49	100	100	98.88	98.99	97.97	89.26
Transcription termination protein NusA	fig|6666666.157468.peg.760	100	100	100	99.72	99.72	99.72	100	100	100	100	100	100	100	100	100	99.45	100	100	99.45	99.72	98.9	83
tRNA-i(6)A37 methylthiotransferase	fig|6666666.157468.peg.762	100	100	100	99.31	99.31	99.31	99.31	99.31	99.31	99.08	99.31	99.31	99.31	0	99.31	99.31	99.31	99.08	99.77	99.54	98.15	0
Arginine/ornithine antiporter ArcD	fig|6666666.157468.peg.766	100	100	100	98.84	98.84	98.84	98.84	98.84	98.84	98.84	100	100	98.84	98.84	100	98.84	98.84	98.84	98.84	100	96.51	70.85
Thiamin biosynthesis protein ThiC	fig|6666666.157468.peg.767	100	100	100	98.84	98.84	98.84	99.53	99.53	99.53	99.53	99.53	99.53	99.53	99.53	99.77	99.3	99.53	99.53	99.3	99.3	98.6	90.27
DNA polymerase III epsilon subunit (EC 2.7.7.7)	fig|6666666.157468.peg.768	100	100	100	97.23	97.23	97.23	99.6	99.6	99.6	99.6	98.02	98.02	99.6	99.6	98.42	98.81	99.6	99.6	98.42	96.96	96.05	91.88
Ribulose-phosphate 3-epimerase (EC 5.1.3.1)	fig|6666666.157468.peg.769	100	100	100	98.6	98.6	98.6	100	100	100	100	100	100	100	100	97.67	97.21	100	100	97.67	98.6	97.21	79.06
LSU ribosomal protein L28p	fig|6666666.157468.peg.770	100	100	100	100	100	100	100	100	100	100	100	100	100	100	0	100	100	100	100	100	96.88	58.72
Methyl-accepting chemotaxis signal transduction protein	fig|6666666.157468.peg.772	100	100	100	99.45	99.45	99.45	100	100	100	100	100	100	100	100	99.18	99.45	100	100	99.18	100	94.55	84.77
Uridine diphosphate glucose pyrophosphatase (EC 3.6.1.45)	fig|6666666.157468.peg.773	100	100	100	98.99	98.99	98.99	99.49	99.49	99.49	99.49	100	100	100	100	100	100	100	100	100	99.49	96.46	73.72
Ferric receptor CfrA	fig|6666666.157468.peg.774	100	100	100	97.83	97.83	97.83	96.84	96.84	96.84	96.84	96.84	96.84	96.84	34.57	98.84	99.28	96.84	96.84	99.13	34.81	94.69	87.25
Acetyl-coenzyme A carboxyl transferase alpha chain (EC 6.4.1.2)	fig|6666666.157468.peg.775	100	100	100	99.04	99.04	99.04	99.36	99.36	99.36	99.36	99.36	99.36	99.36	99.36	99.04	99.36	99.36	99.36	99.36	99.36	99.04	0
3-oxoacyl-[acyl-carrier-protein] synthase, KASII (EC 2.3.1.179)	fig|6666666.157468.peg.776	100	100	100	98.76	98.76	98.76	99.26	99.26	99.26	99.26	99.26	99.26	99.26	99.26	98.76	98.76	99.26	99.26	98.76	99.26	98.27	79.11
Acyl carrier protein	fig|6666666.157468.peg.777	100	100	100	100	100	100	100	100	100	100	100	100	100	100	100	100	100	100	100	98.7	98.7	90.2
Thiaminase II (EC 3.5.99.2)	fig|6666666.157468.peg.778	100	100	100	99.1	99.1	99.1	100	100	100	100	100	100	100	100	99.1	99.1	100	100	99.1	100	97.74	94.33
Succinate dehydrogenase iron-sulfur protein (EC 1.3.99.1)	fig|6666666.157468.peg.780	100	100	100	99.69	99.69	99.69	99.07	99.07	99.07	99.07	99.38	99.38	99.07	99.07	100	100	99.07	99.38	100	99.69	98.04	74.07
Succinate dehydrogenase flavoprotein subunit (EC 1.3.99.1)	fig|6666666.157468.peg.781	100	100	100	98.69	98.69	98.69	98.85	98.85	98.85	98.85	98.85	98.85	98.85	98.85	99.02	98.69	98.85	98.85	99.02	99.48	99.12	0
3-oxoacyl-[acyl-carrier protein] reductase (EC 1.1.1.100)	fig|6666666.157468.peg.783	100	100	100	100	100	100	99.19	99.19	99.19	99.19	99.19	99.19	99.19	99.19	99.19	99.19	99.19	99.19	99.19	100	98.79	80.95
2,3-bisphosphoglycerate-independent phosphoglycerate mutase (EC 5.4.2.1)	fig|6666666.157468.peg.784	100	100	100	99.59	99.59	99.59	98.98	98.98	98.98	98.98	98.78	98.78	98.98	98.98	98.98	98.98	98.98	98.98	98.98	99.59	97.76	87.6
Phospho-N-acetylmuramoyl-pentapeptide-transferase (EC 2.7.8.13)	fig|6666666.157468.peg.785	100	100	100	99.15	99.15	99.15	98.87	98.87	98.87	98.87	98.87	98.87	98.87	98.87	98.58	98.58	98.87	98.87	98.58	99.43	98.58	83.54
UDP-N-acetylmuramoylalanine--D-glutamate ligase (EC 6.3.2.9)	fig|6666666.157468.peg.786	100	100	100	97.51	97.51	97.51	99.5	99.5	99.5	99.5	99.5	99.5	99.5	99.5	98.26	98.26	99.5	99.5	98.01	96.77	92.04	39.29
N-Acetyltransferase PseH involved in the biosynthesis of pseudaminic acid	fig|6666666.157468.peg.788	100	65.22	65.22	98.43	98.43	98.43	100	100	100	100	87.4	87.4	85.04	87.4	99.21	96.85	87.4	82.68	99.21	99.21	91.34	95.57
Imidazole glycerol phosphate synthase cyclase subunit (EC 4.1.3.-)	fig|6666666.157468.peg.789	100	35.9	35.9	96.2	96.2	96.2	93.67	93.67	93.67	93.67	96.2	96.2	94.94	96.2	98.73	98.73	96.2	98.73	98.73	98.73	92.41	73.96
Legionaminic acid synthase (EC 2.5.1.56)	fig|6666666.157468.peg.790	100	77.88	77.88	94.69	94.69	94.69	96.46	96.46	96.46	96.46	94.69	94.69	93.81	94.69	44.23	46.23	93.81	94.69	44.23	96.46	95.58	99.12
Motility accessory factor	fig|6666666.157468.peg.791	100	63.82	63.82	95.48	95.48	95.48	92.5	92.08	92.5	92.5	93.47	93.47	93.97	0	57.29	58	94.47	94.47	58	94.47	87.56	84.66
Type I restriction-modification system, DNA-methyltransferase subunit M (EC 2.1.1.72) / Type I restriction-modification system, specificity subunit S (EC 3.1.21.3)	fig|6666666.157468.peg.792	100	0	0	0	0	0	98.59	98.59	98.6	97.9	98.59	98.59	0	0	0	0	98.59	97.89	0	0	0	48.55
Type I restriction-modification system, DNA-methyltransferase subunit M (EC 2.1.1.72) / Type I restriction-modification system, specificity subunit S (EC 3.1.21.3)	fig|6666666.157468.peg.793	100	0	0	0	0	0	0	0	95.31	92.16	0	0	0	0	0	0	0	0	0	0	0	86.1
Signal peptidase I (EC 3.4.21.89)	fig|6666666.157468.peg.799	100	100	100	0	0	0	0	0	0	0	0	0	0	0	0	0	0	0	0	0	94.58	78.84
Phosphonate ABC transporter phosphate-binding periplasmic component (TC 3.A.1.9.1)	fig|6666666.157468.peg.801	100	100	100	0	0	0	0	0	0	0	0	0	0	0	0	0	0	0	0	0	0	99.59
Thiol:disulfide involved in conjugative transfer	fig|6666666.157468.peg.804	100	100	100	0	0	0	0	0	0	0	0	0	0	0	0	0	0	0	0	0	96.85	91.18
F-box DNA helicase 1	fig|6666666.157468.peg.811	100	100	100	28.66	28.66	28.66	28.66	28.66	28.66	28.66	28.66	28.66	28.66	28.66	28.66	28.66	28.66	28.66	28.66	28.66	95.78	86.1
Potassium uptake protein TrkH	fig|6666666.157468.peg.813	100	100	100	98.88	98.88	98.88	98.88	98.88	98.88	98.88	99.11	99.11	98.88	99.11	99.11	98.88	98.88	99.11	99.11	99.33	98.43	76.01
Trk system potassium uptake protein TrkA	fig|6666666.157468.peg.814	100	100	100	100	100	100	100	100	100	100	100	100	100	100	100	100	100	100	100	100	99.54	96.76
Menaquinone via 6-amino-6-deoxyfutalosine step 1	fig|6666666.157468.peg.815	100	100	100	98.21	98.21	98.21	98.21	98.21	98.21	98.21	98.21	98.21	98.21	98.21	97.76	97.76	98.21	98.21	97.76	98.21	96.41	87.75
Uracil phosphoribosyltransferase (EC 2.4.2.9)	fig|6666666.157468.peg.816	100	100	100	97.6	97.6	97.6	96.63	96.63	96.63	96.63	96.63	96.63	96.63	96.63	97.12	96.63	96.63	96.63	97.12	96.63	96.08	79.5
NADP-dependent malic enzyme (EC 1.1.1.40)	fig|6666666.157468.peg.817	100	100	100	99.51	99.51	99.51	98.54	98.54	98.54	98.54	98.54	98.54	98.54	98.54	98.54	98.54	98.54	98.78	98.54	99.27	97.32	87.03
Glutamyl-tRNA synthetase (EC 6.1.1.17)	fig|6666666.157468.peg.818	100	100	100	99.78	99.78	99.78	99.14	99.14	99.14	99.14	98.92	98.92	99.14	99.14	98.92	98.7	99.14	99.78	98.7	99.57	98.06	94.51
Biotin carboxylase of acetyl-CoA carboxylase (EC 6.3.4.14)	fig|6666666.157468.peg.820	100	100	100	99.77	99.77	99.77	99.55	99.55	99.55	99.55	100	100	99.55	99.55	100	100	99.55	99.77	99.77	99.77	99.77	72.13
Biotin carboxyl carrier protein of acetyl-CoA carboxylase	fig|6666666.157468.peg.821	100	100	100	100	100	100	100	100	100	100	99.34	99.34	100	100	99.34	100	100	100	98.68	100	98.01	98.9
Deoxycytidine triphosphate deaminase (EC 3.5.4.13)	fig|6666666.157468.peg.822	100	100	100	100	100	100	99.46	99.46	99.46	99.46	99.46	99.46	99.46	99.46	99.46	99.46	99.46	99.46	99.46	99.46	99.46	85.71
O-linked glycosylation
UDP-N-acetylglucosamine 4,6-dehydratase (inverting) (EC 4.2.1.115)	fig|6666666.157468.peg.823	100	100	100	99.4	99.4	99.4	99.7	99.7	99.7	99.7	98.8	98.8	99.7	99.7	94.91	97.9	99.7	98.5	98.8	98.5	98.5	74.13
C4 aminotransferase specific for PseB product (PseC, second step of pseudaminic acid biosynthesis)	fig|6666666.157468.peg.824	100	100	100	99.73	99.73	99.73	95.47	95.47	95.47	95.47	95.47	95.47	97.6	95.47	93.07	97.6	95.47	97.33	95.47	97.87	95.47	96.79
Aminoglycoside N3'-acetyltransferase (EC 2.3.1.81)	fig|6666666.157468.peg.827	100	100	100	75.9	75.9	75.9	77.14	77.14	77.14	72.29	77.14	77.14	69.88	77.14	44.3	77.11	69.88	77.14	69.88	99.62	76.1	0
HAD-superfamily phosphatase, subfamily IIIC	fig|6666666.157468.peg.831	100	100	100	97.26	97.26	97.26	97.26	97.26	97.26	97.26	97.26	97.26	97.26	97.26	97.26	97.26	97.26	97.26	97.26	95.89	89.04	96.41
HAD-superfamily phosphatase, subfamily IIIC	fig|6666666.157468.peg.832	100	100	100	99.16	99.16	99.16	99.58	99.58	99.58	99.58	98.32	98.32	99.58	99.58	98.74	99.58	99.58	99.58	98.74	98.74	93.7	95.24
HAD-superfamily phosphatase, subfamily IIIC	fig|6666666.157468.peg.833	100	100	100	99.15	99.15	99.15	97.46	97.46	97.46	97.46	96.61	96.61	97.46	97.46	100	97.46	97.46	97.46	96.61	97.46	95.76	96.11
3-oxoacyl-[acyl-carrier-protein] synthase, KASIII (EC 2.3.1.41)	fig|6666666.157468.peg.834	100	100	100	97.73	97.73	97.73	98.58	98.58	98.58	98.58	97.73	97.73	97.17	97.17	98.02	98.02	97.17	97.17	98.3	97.45	97.73	88.25
acetyltransferase, GNAT family	fig|6666666.157468.peg.838	100	100	100	0	0	0	0	0	94.29	0	0	0	0	0	81.67	81.25	0	0	0	96.27	0	95.95
formyl transferase domain protein	fig|6666666.157468.peg.839	100	98.8	95.88	32.41	32.41	32.41	28.85	28.85	28.85	28.85	29.82	29.82	28.85	28.85	70	80.12	28.85	28.85	32.41	98.19	81.03	88.21
formyl transferase domain protein	fig|6666666.157468.peg.840	100	100	100	0	0	0	0	0	0	0	0	0	0	0	91.67	93.75	0	0	0	100	85.42	90
3-oxoacyl-[acyl-carrier-protein] synthase, KASIII (EC 2.3.1.41)	fig|6666666.157468.peg.845	100	100	100	31.55	31.55	97.96	25.58	36	94.02	25.58	26.38	26.38	26.38	26.38	26.38	26.09	26.38	26.38	25.87	36	32.09	97.01
Pseudaminic acid cytidylyltransferase (EC 2.7.7.43)	fig|6666666.157468.peg.847	100	100	100	97.41	97.41	97.41	97.84	97.84	97.84	97.84	97.84	97.84	97.84	97.84	99.14	93.42	97.84	99.57	97.84	98.71	93.42	92.17
UDP-6-deoxy-AltdiNAc hydrolase (PseG, third step of pseudaminic acid biosynthesis)	fig|6666666.157468.peg.848	100	100	100	86.81	86.81	86.81	86.81	86.81	86.81	86.35	86.35	86.81	86.35	86.81	87.18	86.81	86.81	99.26	86.81	87.18	85.35	0
N-Acetyltransferase PseH involved in the biosynthesis of pseudaminic acid	fig|6666666.157468.peg.849	100	100	100	64.14	64.14	64.14	64.14	64.14	64.14	64.14	64.83	64.83	65.52	64.83	64.83	64.83	64.83	87.59	64.83	64.83	66.21	95.59
Methionyl-tRNA formyltransferase (EC 2.1.2.9)	fig|6666666.157468.peg.850	100	100	100	0	0	0	0	0	0	0	0	0	0	0	0	0	0	0	0	0	31.07	89.47
Pseudaminic acid synthase (EC 4.1.3.-)	fig|6666666.157468.peg.851	100	100	100	89.5	89.5	89.5	89.5	89.5	89.5	89.5	88.92	88.92	88.34	89.21	89.21	89.5	88.89	89.21	89.21	89.47	88.05	84.62
dTDP-glucose 4,6-dehydratase (EC 4.2.1.46)	fig|6666666.157468.peg.852	100	100	100	89.97	89.97	89.97	89.34	89.34	89.34	89.34	89.34	89.34	89.34	89.66	28.14	29.45	89.66	89.34	27.39	89.66	88.71	88.69
Bacillosamine/Legionaminic acid biosynthesis aminotransferase PglE; 4-keto-6-deoxy-N-Acetyl-D-hexosaminyl-(Lipid carrier) aminotransferase	fig|6666666.157468.peg.853	100	100	100	82.32	82.32	82.32	83.07	83.07	83.07	83.07	83.07	83.07	82.32	81.79	37.18	37.18	82.59	81.79	37.18	82.32	82.28	86.55
Legionaminic acid biosynthesis protein PtmG	fig|6666666.157468.peg.854	100	100	100	87.13	87.13	86.86	89.54	89.54	89.54	89.54	87.13	87.13	32.8	87.4	32.8	32.8	87.67	87.4	32.54	32.54	93.65	100
Legionaminic acid synthase (EC 2.5.1.56)	fig|6666666.157468.peg.857	100	100	100	81.14	81.14	81.14	80.84	80.84	80.84	80.84	81.14	81.14	80.84	81.44	39.76	39.09	80.84	81.44	39.76	80.84	80.84	74.75
UDP-N-acetylglucosamine 2-epimerase (EC 5.1.3.14)	fig|6666666.157468.peg.858	100	100	100	83.07	83.07	83.07	83.07	83.07	83.07	83.07	83.33	83.33	82.29	0	37.58	38.2	82.55	82.55	38.2	82.29	81.36	96.44
D-glycero-D-manno-heptose 1-phosphate guanosyltransferase	fig|6666666.157468.peg.859	100	100	100	84.55	84.55	84.55	84.84	84.84	98.81	84.84	84.26	84.26	83.38	84.26	32.72	32.86	84.55	84.26	24.24	84.26	84.84	82.71
Legionaminic acid biosynthesis protein PtmF	fig|6666666.157468.peg.860	100	100	100	60.33	60.33	60.33	61.33	61.33	61.33	61.33	60.67	60.67	60.67	60.67	25.65	25.65	60.33	60.67	25.65	61	60.67	81.95
Legionaminic acid cytidylyltransferase (EC 2.7.7.43)	fig|6666666.157468.peg.861	100	100	100	83.83	83.83	83.83	83.4	83.4	83.4	83.4	84.68	84.68	83.83	83.83	34.51	34.51	84.26	83.83	34.07	85.11	82.98	82.78
Legionaminic acid biosynthesis protein PtmA	fig|6666666.157468.peg.862	100	100	100	78.52	78.52	78.52	78.91	78.91	78.91	78.91	80.08	80.08	78.12	79.3	24.76	24.76	79.3	79.3	24.76	78.91	78.91	79.21
Motility accessory factor	fig|6666666.157468.peg.863	100	100	100	65.37	65.37	65.37	64.72	64.72	64.72	64.72	65.05	65.05	65.21	0	62.3	62.94	65.53	65.53	62.78	65.21	62.91	97.46
Motility accessory factor	fig|6666666.157468.peg.864	100	99.84	99.84	59.84	59.84	59.84	60.48	60.19	60.48	60.48	61.76	58.44	56.68	61.16	57.98	59.79	59.49	62.28	57.89	62.64	61.13	98.4
Motility accessory factor	fig|6666666.157468.peg.865	100	100	100	55.7	55.7	55.7	55.54	55.54	55.54	55.54	55.7	55.7	55.7	54.9	82.59	80.22	54.9	54.9	57.1	55.38	54.41	79.24
Flagellin	fig|6666666.157468.peg.866	100	97.91	100	80.17	80.34	80.17	79.38	79.38	79.38	77.12	79.38	79.38	78.43	78.68	88.06	91.16	78.51	78.68	91.65	78.16	75.39	100
Flagellin	fig|6666666.157468.peg.867	100	97.91	97.91	79.48	79.66	79.48	78.16	78.16	78.16	76.78	78.16	78.16	77.74	77.47	86.68	90.12	77.47	77.3	90.61	77.3	77.64	0
Motility accessory factor	fig|6666666.157468.peg.868	100	100	100	60.92	63.05	63.05	63.37	63.37	63.92	63.02	63.37	63.37	63.37	63.22	58.21	58.65	63.05	63.22	58.04	61.64	62.17	89.9
Type II secretion envelope pseudopilin protein (PulG,guides folded protein to PulD in outer membrane)	fig|6666666.157468.peg.870	100	100	100	95.91	95.91	95.91	95.91	95.91	95.91	95.91	95.91	95.91	95.91	97.66	92.98	96.49	95.91	97.66	97.65	97.66	93.49	88.34
TsaD/Kae1/Qri7 protein, required for threonylcarbamoyladenosine t(6)A37 formation in tRNA	fig|6666666.157468.peg.871	100	100	100	97.61	97.61	97.61	97.61	97.61	97.61	97.61	97.61	97.61	97.61	97.61	98.81	97.61	97.61	97.61	99.1	97.61	96.12	96.74
1-deoxy-D-xylulose 5-phosphate reductoisomerase (EC 1.1.1.267)	fig|6666666.157468.peg.873	100	100	100	98.31	98.31	98.31	98.31	98.31	98.31	98.31	98.6	98.6	98.31	98.6	99.16	98.31	98.31	98.6	98.03	98.88	96.63	0
Phosphatidate cytidylyltransferase (EC 2.7.7.41)	fig|6666666.157468.peg.874	100	100	100	99.17	99.17	99.17	98.76	98.76	98.76	98.76	98.76	98.76	98.76	99.17	99.59	98.76	98.76	99.17	100	99.17	97.1	93.25
Fibronectin/fibrinogen-binding protein	fig|6666666.157468.peg.876	100	100	100	99.08	99.08	99.08	98.85	98.85	98.85	98.85	98.85	98.85	98.85	99.77	98.85	99.54	98.85	99.77	98.85	99.54	97.24	82.03
Molybdopterin-guanine dinucleotide biosynthesis protein MobA	fig|6666666.157468.peg.877	100	100	100	100	100	100	98.95	98.95	98.95	98.95	98.95	98.95	98.95	97.91	98.95	100	98.43	97.91	98.95	97.91	97.38	93.53
Phospholipase A1 precursor (EC 3.1.1.32, EC 3.1.1.4); Outer membrane phospholipase A	fig|6666666.157468.peg.878	100	100	100	97.57	97.57	97.57	97.26	97.26	97.26	97.26	97.26	97.26	97.87	98.64	97.26	99.39	98.18	98.18	97.26	98.48	0	89.61
Enterochelin uptake permease CeuB	fig|6666666.157468.peg.879	100	100	100	99.07	99.07	99.07	99.07	99.07	99.07	95.45	99.07	99.07	98.76	99.07	99.38	98.45	98.76	98.76	98.76	98.76	79.73	99.29
Enterochelin uptake permease CeuC	fig|6666666.157468.peg.880	100	100	100	99.03	99.03	99.03	98.7	98.7	98.7	98.7	98.7	98.7	99.03	99.03	99.35	99.03	99.03	99.03	98.7	99.68	29.73	90.45
Enterochelin uptake ATP-binding protein	fig|6666666.157468.peg.881	100	100	100	99.6	99.6	99.6	97.61	97.61	97.61	97.61	97.61	97.61	100	100	97.61	97.61	100	100	97.61	99.2	37.95	96.48
Enterochelin uptake periplasmic binding protein	fig|6666666.157468.peg.882	100	100	100	98.18	98.18	98.18	98.48	98.48	98.48	98.48	98.48	98.48	97.57	100	98.18	99.09	97.57	100	98.48	27.92	25.62	98.73
FIG00732228: membrane protein	fig|6666666.157468.peg.883	100	100	100	98.37	98.37	98.37	99.46	99.46	99.46	99.46	99.46	99.46	99.46	99.46	99.46	98.37	99.46	99.46	99.46	97.83	98.37	78.13
Cytochrome c552 precursor (EC 1.7.2.2)	fig|6666666.157468.peg.884	100	100	100	99.51	99.51	99.51	99.51	99.51	99.51	99.51	99.67	99.67	99.67	99.67	99.51	99.67	99.67	99.51	99.51	99.84	99.02	76.6
Cytochrome c nitrite reductase, small subunit NrfH	fig|6666666.157468.peg.885	100	100	100	100	100	100	100	100	100	100	100	100	100	99.39	99.39	100	100	100	100	99.39	98.16	79.07
Polyphosphate kinase (EC 2.7.4.1)	fig|6666666.157468.peg.886	100	100	100	98.99	98.99	98.99	99.71	99.71	99.71	99.71	99.86	99.86	99.71	99.86	99.86	99.42	99.71	99.86	99.71	100	98.85	91.33
Holliday junction DNA helicase RuvB	fig|6666666.157468.peg.891	100	100	100	99.7	99.7	99.7	99.4	99.4	99.4	99.4	99.4	99.4	99.4	99.4	99.4	98.81	99.4	99.4	99.4	99.4	98.81	94.12
Acid membrane antigen A	fig|6666666.157468.peg.892	100	100	100	100	100	100	99.42	99.42	99.42	99.42	99.42	99.42	99.42	99.42	99.42	99.71	99.42	99.42	99.42	99.42	98.27	92.71
Fumarate hydratase class II (EC 4.2.1.2)	fig|6666666.157468.peg.893	100	100	100	99.14	99.14	99.14	99.57	99.57	99.57	99.57	99.14	99.14	99.14	99.14	99.57	99.35	99.14	99.14	99.57	98.7	98.27	77.04
Glucosamine--fructose-6-phosphate aminotransferase [isomerizing] (EC 2.6.1.16)	fig|6666666.157468.peg.895	100	100	100	99.83	99.83	99.83	99.5	99.5	99.5	99.5	99.67	99.67	99.67	99.67	99.5	99.16	99.67	99.67	99.5	99.5	98.49	67.34
[Protein-PII] uridylyltransferase (EC 2.7.7.59)	fig|6666666.157468.peg.896	100	100	100	99.23	99.23	99.23	99.1	99.1	99.1	99.1	99.23	99.23	99.23	99.23	99.49	99.1	99.23	99.23	99.23	99.74	99.36	84.55
Gene SCO4494, often clustered with other genes in menaquinone via futalosine pathway	fig|6666666.157468.peg.897	100	100	100	93.79	93.79	93.79	99.15	99.15	99.15	99.15	99.72	99.72	99.72	99.72	91.81	92.37	99.72	99.72	100	100	98.31	87.92
Guanine-hypoxanthine permease	fig|6666666.157468.peg.898	100	100	100	93.51	93.17	93.17	98.86	98.86	98.86	98.86	99.54	99.54	99.54	99.54	92.94	92.48	99.54	99.54	99.54	99.32	98.86	79.26
Xanthine-guanine phosphoribosyltransferase (EC 2.4.2.22)	fig|6666666.157468.peg.899	100	100	100	97.28	97.28	97.28	97.96	97.96	97.96	97.96	100	100	100	100	96.6	98.64	100	100	100	100	97.28	91.13
membrane protein	fig|6666666.157468.peg.902	100	100	100	98.42	98.42	98.42	98.66	98.66	98.66	98.66	98.3	98.3	98.3	98.3	98.78	98.18	98.3	98.3	99.64	99.15	97.57	91.67
Nucleoside 5-triphosphatase RdgB (dHAPTP, dITP, XTP-specific) (EC 3.6.1.15)	fig|6666666.157468.peg.903	100	100	100	99.5	99.5	99.5	98	98	98	98	99.5	99.5	99.5	99.5	99.5	99.5	99.5	99.5	100	100	97.5	0
Iron-sulfur cluster-binding protein	fig|6666666.157468.peg.906	100	100	100	98.01	98.01	98.01	97.28	97.28	97.28	97.28	98.19	98.19	97.65	97.65	97.82	98.01	97.65	97.65	99.82	98.55	98.19	96.03
L-seryl-tRNA(Sec) selenium transferase (EC 2.9.1.1)	fig|6666666.157468.peg.907	100	100	100	97.73	97.73	97.73	99.09	99.09	99.09	99.09	98.41	98.41	98.41	98.41	98.41	97.95	98.41	98.41	100	98.18	98.18	92.14
Selenocysteine-specific translation elongation factor	fig|6666666.157468.peg.908	100	100	100	99	99	99	99.67	99.67	99.67	99.67	99.5	99.5	99.5	99.5	99.33	99.17	99.5	99.5	100	99.33	97.17	67.09
Flavodoxin 1	fig|6666666.157468.peg.911	100	100	100	99.39	99.39	99.39	99.39	99.39	99.39	99.39	99.39	99.39	99.39	99.39	99.39	99.39	99.39	99.39	99.39	100	97.55	76.34
Catalase (EC 1.11.1.6)	fig|6666666.157468.peg.914	100	100	100	99.37	99.37	99.37	99.58	99.58	99.58	99.58	99.37	99.37	99.37	99.37	99.37	99.16	99.37	99.37	99.37	99.79	99.37	82.53
Ankyrin-repeat containing protein	fig|6666666.157468.peg.915	100	100	100	98.08	98.08	98.08	98.08	98.08	98.08	98.08	98.72	98.72	98.72	98.72	98.08	98.08	98.72	98.72	98.08	98.72	98.08	84.21
YheO-like PAS domain	fig|6666666.157468.peg.916	100	100	100	99.08	99.08	99.08	99.08	99.08	99.08	99.08	99.08	99.08	99.08	99.08	99.08	99.08	99.08	99.08	99.08	98.62	96.33	81.38
Endoribonuclease L-PSP	fig|6666666.157468.peg.917	100	100	100	100	100	100	99.17	99.17	99.17	99.17	99.17	99.17	99.17	99.17	100	100	99.17	99.17	100	96.67	99.17	88.11
Anaerobic C4-dicarboxylate transporter DcuC	fig|6666666.157468.peg.918	100	100	100	98.75	98.75	98.75	98.96	98.96	98.96	98.96	99.44	99.44	99.44	0	98.96	99.37	99.44	99.44	98.54	0	95.48	91.74
Cystathionine beta-lyase (EC 4.4.1.8)	fig|6666666.157468.peg.919	100	100	100	99.22	99.22	99.22	99.22	99.22	99.22	99.22	97.56	97.56	97.56	97.56	99.22	99.22	97.56	97.56	99.22	97.16	97.93	96
Adenylosuccinate lyase (EC 4.3.2.2)	fig|6666666.157468.peg.920	100	100	100	99.12	99.12	99.12	99.12	99.12	99.12	99.12	96.55	96.55	96.55	96.7	99.12	99.08	96.7	96.55	99.08	98.46	97.73	93.07
Ferrous iron transport protein B	fig|6666666.157468.peg.923	100	100	100	98.86	98.86	98.86	99.02	99.02	99.02	99.02	99.51	99.51	99.51	99.51	99.59	99.02	99.48	99.65	98.86	0	98.38	77.1
hydrogenase, (NiFe)/(NiFeSe) small subunit family	fig|6666666.157468.peg.924	100	100	100	97.79	97.79	97.79	97.64	97.64	97.64	97.64	98.39	98.39	98.39	98.39	97.99	97.99	98.39	97.59	97.79	96.98	96.38	29.04
Enoyl-[acyl-carrier-protein] reductase [NADH] (EC 1.3.1.9)	fig|6666666.157468.peg.925	100	100	100	99.27	99.27	99.27	99.63	99.63	99.63	99.64	99.63	99.64	99.64	99.64	99.64	99.64	99.64	99.64	99.64	98.91	98.18	0
Triosephosphate isomerase (EC 5.3.1.1)	fig|6666666.157468.peg.926	100	100	100	95.52	95.52	95.52	96.86	96.86	96.86	96.86	96.86	96.86	96.86	96.86	97.31	96.86	96.41	96.86	96.86	98.21	95.52	96.74
Phosphoglycerate kinase (EC 2.7.2.3)	fig|6666666.157468.peg.927	100	100	100	99.25	99.25	99.25	99.75	99.75	99.75	99.5	99.75	99.75	99.75	99.5	99.25	99.75	99.75	99.75	99.75	99.25	99	94.68
NAD-dependent glyceraldehyde-3-phosphate dehydrogenase (EC 1.2.1.12)	fig|6666666.157468.peg.928	100	100	100	99.1	99.1	99.1	99.1	99.1	99.1	99.1	99.1	99.1	99.1	99.1	99.1	99.1	99.1	99.1	99.1	98.19	97.87	99.27
Nicotinate-nucleotide adenylyltransferase (EC 2.7.7.18)	fig|6666666.157468.peg.929	100	100	100	98.9	98.9	98.9	95.03	95.03	95.03	0	99.45	99.45	97.79	99.45	98.9	95.03	99.45	95.03	95.03	99.45	92.27	75.1
Nicotinate-nucleotide adenylyltransferase (EC 2.7.7.18) / Iojap protein # NadD-YbeB fusion	fig|6666666.157468.peg.930	100	100	100	99.07	99.07	99.07	98.15	98.15	98.15	98.15	100	100	98.15	100	99.07	98.15	100	98.15	98.15	99.07	97.22	83.44
Phosphomannomutase (EC 5.4.2.8) / Phosphoglucomutase (EC 5.4.2.2) / Phosphoglucosamine mutase (EC 5.4.2.10)	fig|6666666.157468.peg.932	100	100	100	98.9	98.9	98.9	97.59	97.59	97.59	97.59	100	100	97.81	0	99.12	97.81	100	97.81	97.15	97.81	95.39	91.37
Flagellar biosynthesis protein FliL	fig|6666666.157468.peg.933	100	100	100	99.44	99.44	99.44	99.44	99.44	99.44	99.44	100	100	99.44	100	99.44	99.44	100	99.44	99.44	98.88	97.75	77.83
Holo-[acyl-carrier protein] synthase (EC 2.7.8.7)	fig|6666666.157468.peg.934	100	100	100	99.13	99.13	99.13	99.13	99.13	99.13	99.13	99.13	99.13	99.13	99.13	99.13	99.13	99.13	99.13	98.26	100	98.26	82.67
Arginine/ornithine antiporter ArcD	fig|6666666.157468.peg.935	100	100	100	99.28	99.28	99.28	98.56	98.56	98.56	98.56	100	100	98.56	100	99.28	98.56	100	98.56	100	100	98.56	87.88
Cytochrome P450 family protein	fig|6666666.157468.peg.936	100	100	100	99.12	99.12	99.12	98.9	98.9	98.9	97.98	100	100	99.56	100	98.9	98.9	100	98.9	99.12	100	98.45	81.21
Capsular biosynthesis
Capsular polysaccharide export system protein KpsS	fig|6666666.157468.peg.938	100	100	100	98.48	98.48	98.48	98.22	98.22	98.22	98.22	97.72	97.72	98.98	97.72	100	96.19	97.72	97.72	95.94	98.98	93.81	98.78
Capsular polysaccharide export system protein KpsC	fig|6666666.157468.peg.939	100	100	100	90.98	90.98	90.98	88.17	88.17	88.17	88.17	90.53	90.53	90.53	90.53	93.44	86.18	90.53	90.53	85.78	94.81	86.67	95.74
CMP-N-acetylneuraminate-beta-galactosamide-alpha-2,3-sialyltransferase (EC 2.4.99.-)	fig|6666666.157468.peg.941	100	100	100	53.28	56.84	53.28	50.76	50.76	50.76	50.76	47.22	47.22	47.22	47.22	50.34	52.14	47.22	47.22	67.33	46.58	55.17	80.59
D-glycero-D-manno-heptose 1-phosphate guanosyltransferase	fig|6666666.157468.peg.942	100	100	100	87.5	87.5	87.5	90.32	90.32	90.32	90.32	90.32	90.32	94.04	90.32	89.73	91.86	90.32	90.32	39.06	84.47	94.37	84.37
Phosphoheptose isomerase 2 (EC 5.3.1.-)	fig|6666666.157468.peg.943	100	100	100	96.02	96.02	96.02	97.51	97.51	97.51	97.51	97.51	97.51	97.01	96.52	98.01	98.01	96.52	96.52	50.56	98.01	94.39	92.39
D,D-heptose 7-phosphate kinase	fig|6666666.157468.peg.944	100	99.66	99.66	96.27	96.27	96.27	97.97	97.97	97.97	97.97	97.97	97.97	96.61	95.59	96.27	95.25	95.59	95.59	0	99.32	96.27	0
GDP-mannose 4,6-dehydratase (EC 4.2.1.47)	fig|6666666.157468.peg.945	100	100	100	88.66	93.88	88.66	94.24	94.24	94.24	94.24	94.24	94.24	27.16	27.46	88.95	93.29	27.46	27.16	26.47	93.59	88.12	90.29
CDP-4-dehydro-6-deoxy-D-glucose 3-dehydratase (EC 4.2.1.-)	fig|6666666.157468.peg.946	100	100	100	28.87	28.87	28.87	29.25	29.55	29.25	29.25	29.55	29.55	29.76	29.25	28.69	29.46	29.25	29.46	29.25	29.46	82.6	92.54
GDP-L-fucose synthetase (EC 1.1.1.271)	fig|6666666.157468.peg.947	100	100	100	45.69	45.69	45.69	44.54	44.54	44.54	44.54	44.54	44.54	46.69	46.69	48.56	51.72	48.76	46.69	0	51.29	55.56	97.27
dTDP-4-dehydrorhamnose 3,5-epimerase (EC 5.1.3.13)	fig|6666666.157468.peg.948	100	100	100	72.93	72.93	72.93	72.93	72.93	72.93	72.93	72.93	72.93	73.33	73.33	71.67	71.82	73.33	73.33	0	0	72.57	83.62
CMP-N-acetylneuraminate-beta-galactosamide-alpha-2,3-sialyltransferase (EC 2.4.99.-)	fig|6666666.157468.peg.949	100	99.89	99.89	52	60.17	52	65.81	65.81	65.81	65.81	50.49	50.49	50.49	50.49	48.7	67.62	50.49	50.49	60.53	63.64	64.1	93.05
Glycosyltransferase	fig|6666666.157468.peg.952	100	100	100	0	0	0	0	0	0	0	0	0	0	0	0	0	0	0	0	0	0	73.13
Mlr0581 protein	fig|6666666.157468.peg.954	100	100	100	0	0	0	0	0	0	0	0	0	0	0	0	0	0	0	0	0	33.73	26.43
UDP-glucose dehydrogenase (EC 1.1.1.22)	fig|6666666.157468.peg.955	100	100	100	0	0	0	0	0	0	0	27.15	27.15	27.15	27.15	0	32.42	27.15	27.15	24.53	0	0	90.97
UDP-N-acetylglucosamine 2-epimerase (EC 5.1.3.14)	fig|6666666.157468.peg.956	100	100	100	21.46	21.46	21.46	27.96	27.96	27.96	27.96	28.8	28.8	28.8	28.8	25.19	27.96	28.8	27.96	27.96	21.46	23.96	96.54
Capsular polysaccharide export system protein KpsF	fig|6666666.157468.peg.957	100	100	100	96.19	96.19	96.19	95.56	95.56	95.56	95.56	95.56	95.56	95.56	95.56	97.46	95.56	95.56	95.56	96.19	97.14	95.56	79.3
Capsular polysaccharide export system periplasmic protein KpsD	fig|6666666.157468.peg.958	100	100	100	99.46	99.46	99.46	99.28	99.28	99.28	99.28	99.28	99.28	99.28	99.28	99.46	98.91	99.28	99.28	98.37	99.09	96.38	91.15
Capsular polysaccharide export system inner membrane protein KpsE	fig|6666666.157468.peg.959	100	100	100	97.85	97.85	97.85	99.46	99.46	99.46	99.71	97.58	97.58	97.58	97.58	98.39	97.58	97.58	97.58	97.31	98.39	91.94	99.66
Capsular polysaccharide ABC transporter, ATP-binding protein KpsT	fig|6666666.157468.peg.960	100	100	100	97.73	97.73	97.73	99.55	99.55	99.55	99.55	99.09	99.09	99.09	99.09	98.64	97.72	99.09	99.09	99.09	98.64	95.91	80.7
Capsular polysaccharide ABC transporter, permease protein KpsM	fig|6666666.157468.peg.961	100	100	100	92.69	92.69	92.69	99.62	99.62	99.62	100	94.62	94.62	94.62	94.62	98.85	88.85	94.62	94.62	91.92	98.85	88.85	79.52
Dimeric dUTPase (EC 3.6.1.23)	fig|6666666.157468.peg.964	100	100	100	97.82	97.82	97.82	98.25	98.25	98.25	98.25	98.25	98.25	98.25	98.25	96.94	97.38	98.25	98.25	93.45	95.63	94.32	81.28
tRNA(Ile)-lysidine synthetase (EC 6.3.4.19)	fig|6666666.157468.peg.966	100	100	100	95.64	95.64	95.64	96.26	96.26	96.26	96.26	96.88	96.88	96.88	96.88	96.57	96.26	96.88	96.88	96.57	96.57	96.26	88.37
Ribosomal protein S12p Asp88 (E. coli) methylthiotransferase	fig|6666666.157468.peg.967	100	100	100	98.18	98.18	98.18	98.41	98.41	98.41	98.41	97.72	97.72	97.72	97.72	98.18	98.41	97.72	97.72	97.72	97.72	97.27	86.1
Peptide chain release factor 2	fig|6666666.157468.peg.968	100	100	100	99.45	99.45	99.45	99.45	99.45	99.45	99.45	99.45	99.45	99.45	99.45	98.9	99.45	99.45	99.45	99.18	98.9	97.81	81.36
tRNA pseudouridine 13 synthase (EC 4.2.1.-)	fig|6666666.157468.peg.970	100	100	100	98.12	98.12	98.12	97.58	97.58	97.58	97.31	99.19	99.19	99.19	99.19	98.12	97.85	99.19	99.19	95.69	97.58	95.16	87.75
Thiamine-monophosphate kinase (EC 2.7.4.16)	fig|6666666.157468.peg.971	100	100	100	98.9	98.9	98.9	96.34	96.34	96.34	96.34	98.17	98.17	98.17	98.17	97.44	98.53	98.17	98.17	95.97	98.9	96.7	93.87
JHP0747 family	fig|6666666.157468.peg.973	100	100	100	100	100	100	97.64	97.64	97.64	97.64	99.21	99.21	99.21	99.21	99.21	100	99.21	99.21	96.85	98.43	96.06	90.71
16S rRNA (guanine(966)-N(2))-methyltransferase (EC 2.1.1.171)	fig|6666666.157468.peg.974	100	100	100	98.68	98.68	98.68	96.48	96.48	96.48	96.48	97.36	97.36	97.36	97.36	98.24	100	97.36	97.36	95.11	100	95.13	79.26
Flagellar P-ring protein FlgI	fig|6666666.157468.peg.975	100	100	100	100	100	100	100	100	100	100	99.43	99.43	99.14	99.14	99.71	100	99.14	99.43	100	100	99.71	75.17
Flagellar hook-associated protein FlgK	fig|6666666.157468.peg.979	100	100	100	98.36	98.36	98.36	99.34	99.34	99.34	99.34	99.01	99.01	99.01	99.01	98.85	98.68	99.01	99.01	100	98.36	97.53	87.9
Type II secretion system protein	fig|6666666.157468.peg.982	100	100	100	98.73	98.73	98.73	98.22	98.22	98.22	98.22	98.47	98.47	98.47	0	97.96	97.96	98.47	98.47	97.96	98.73	98.21	76.89
Type IV fimbrial assembly, ATPase PilB	fig|6666666.157468.peg.983	100	100	100	99.5	99.5	99.5	98.46	98.46	98.46	98.46	98.99	98.98	99.23	99.04	99.42	99.06	99.03	99.03	98.45	99.04	98.06	0
Transformation system protein	fig|6666666.157468.peg.984	100	100	100	98.97	98.97	98.97	100	100	100	100	100	100	100	100	100	100	100	100	100	98.46	98.46	90.61
MSHA biogenesis protein MshM	fig|6666666.157468.peg.985	100	100	100	100	100	100	100	100	100	100	100	100	100	100	99.5	100	100	100	100	100	97.03	88.04
MSHA biogenesis protein MshL	fig|6666666.157468.peg.986	100	100	100	99.79	99.79	99.79	99.79	99.79	99.79	99.79	99.36	99.36	99.79	99.35	99.79	100	99.35	99.35	99.79	99.57	97.87	41.08
Transformation system protein	fig|6666666.157468.peg.987	100	100	100	100	100	100	100	100	100	98.98	98.98	98.98	100	98.98	98.98	98.98	98.98	98.98	98.98	98.98	94.9	62.59
Pyruvate-flavodoxin oxidoreductase (EC 1.2.7.-)	fig|6666666.157468.peg.988	100	100	100	99.58	99.58	99.58	100	100	100	100	99.83	99.83	100	100	99.58	99.83	100	100	100	99.83	99.07	78.87
Phosphoglycolate phosphatase (EC 3.1.3.18)	fig|6666666.157468.peg.989	100	100	100	98.58	98.58	98.58	98.15	98.15	98.11	98.15	99.53	99.53	99.06	99.06	98.12	99.53	99.06	99.06	98.59	98.59	98.59	86.56
Outer membrane fibronectin-binding protein	fig|6666666.157468.peg.990	100	100	100	99.06	99.06	99.06	99.69	99.69	99.69	99.06	100	100	100	100	98.75	100	100	100	99.69	99.37	97.49	66.57
SSU ribosomal protein S9p (S16e)	fig|6666666.157468.peg.991	100	100	100	99.22	99.22	99.22	99.22	99.22	99.22	99.22	99.22	99.22	99.22	99.22	99.22	99.22	99.22	99.22	99.22	99.22	99.22	82.49
LSU ribosomal protein L13p (L13Ae)	fig|6666666.157468.peg.992	100	100	100	100	100	100	99.29	99.29	99.29	99.29	100	100	100	100	100	100	100	100	99.29	100	99.29	72.56
Helicase	fig|6666666.157468.peg.993	100	100	100	99.57	99.57	99.57	100	100	100	100	99.78	99.78	100	99.89	98.59	97.94	100	100	100	99.89	97.29	85.12
Arginine/ornithine antiporter ArcD	fig|6666666.157468.peg.996	100	100	100	100	100	100	99.5	99.5	99.5	99.5	100	100	100	100	99.5	100	100	100	99	100	99.5	94.17
Cytochrome c oxidase subunit CcoP (EC 1.9.3.1)	fig|6666666.157468.peg.998	100	100	100	99.3	99.3	99.3	100	100	100	100	100	100	100	100	100	100	100	100	100	100	98.95	0
Cytochrome c oxidase subunit CcoQ (EC 1.9.3.1)	fig|6666666.157468.peg.999	100	100	100	100	100	100	100	100	100	100	98.85	98.85	98.85	98.85	100	98.85	98.85	98.85	100	100	96.55	0
Cytochrome c oxidase subunit CcoO (EC 1.9.3.1)	fig|6666666.157468.peg.1000	100	100	100	99.1	99.1	99.1	99.55	99.55	99.55	99.55	100	100	100	100	100	99.55	100	100	100	99.55	99.1	0
Cytochrome c oxidase subunit CcoN (EC 1.9.3.1)	fig|6666666.157468.peg.1001	100	100	100	100	100	100	100	100	100	100	100	100	100	100	100	100	100	100	100	99.59	99.39	82.17
Carbamoyl-phosphate synthase small chain (EC 6.3.5.5)	fig|6666666.157468.peg.1005	100	100	100	100	100	100	99.73	99.73	99.73	99.73	100	100	100	100	100	100	100	100	100	100	99.73	91.99
Adenylosuccinate synthetase (EC 6.3.4.4)	fig|6666666.157468.peg.1009	100	100	100	99.52	99.52	99.52	99.04	99.04	99.04	99.04	99.28	99.28	99.28	99.28	99.52	99.52	99.28	99.28	99.52	99.52	99.52	92.59
Arginine/ornithine antiporter ArcD	fig|6666666.157468.peg.1010	100	100	100	98.26	98.26	98.26	98.26	98.44	98.26	98.26	98.26	98.26	98.26	98.26	98.26	98.01	98.26	98.51	98.26	98.51	98.01	0
Proline/sodium symporter PutP (TC 2.A.21.2.1) @ Propionate/sodium symporter	fig|6666666.157468.peg.1012	100	100	100	98.98	98.98	98.98	98.77	98.77	98.77	98.33	98.77	98.77	98.77	98.77	98.98	98.77	98.77	98.77	98.98	99.18	98.16	43.68
Proline dehydrogenase (EC 1.5.99.8) (Proline oxidase) / Delta-1-pyrroline-5-carboxylate dehydrogenase (EC 1.5.1.12)	fig|6666666.157468.peg.1013	100	100	100	99.83	99.83	99.83	99.57	99.57	99.57	99.57	99.48	99.48	99.57	99.4	99.83	99.57	99.57	99.57	99.83	98.28	97.16	94.95
Selenide,water dikinase (EC 2.7.9.3) @ selenocysteine-containing	fig|6666666.157468.peg.1014	100	100	100	99.68	99.68	99.68	99.68	99.68	99.68	99.68	99.68	99.68	99.68	0	99.68	100	99.68	0	0	96.43	97.4	78.41
methyl-accepting chemotaxis protein (tlpA)	fig|6666666.157468.peg.1017	100	100	100	99.71	99.71	99.71	99.71	99.71	99.71	99.71	99.57	99.57	99.57	99.57	99.29	99.57	99.57	99.57	99.57	99.71	91.86	48.45
Molybdate transport repressor domain protein ModE	fig|6666666.157468.peg.1018	100	100	100	98.78	98.78	98.78	100	100	100	100	100	100	100	100	100	98.78	100	100	99.18	99.59	97.96	80.97
Formate dehydrogenase chain D (EC 1.2.1.2)	fig|6666666.157468.peg.1019	100	100	100	98.08	98.08	98.08	100	100	100	100	99.62	99.62	99.62	99.62	98.85	98.08	99.62	99.62	98.08	98.46	97.3	49.09
Formate dehydrogenase-O, major subunit (EC 1.2.1.2) @ selenocysteine-containing	fig|6666666.157468.peg.1023	100	100	100	99.46	99.46	99.46	99.89	99.89	99.89	99.89	99.79	99.79	99.79	99.79	100	0	100	0	0	99.79	99.6	84.39
Formate dehydrogenase subunit or accessory protein	fig|6666666.157468.peg.1025	100	100	100	98.41	98.41	98.41	98.41	98.41	98.41	98.41	98.41	98.41	98.41	98.41	98.41	98.41	98.41	98.41	98.41	100	98.41	90.43
Multicopper oxidase	fig|6666666.157468.peg.1028	100	100	100	97.47	97.47	97.47	97.27	97.27	97.27	97.27	98.64	98.64	98.64	98.64	97.66	97.27	98.64	97.47	96.88	99.22	95.64	74.01
Molybdenum cofactor biosynthesis protein MoaD	fig|6666666.157468.peg.1029	100	100	100	97.26	97.26	97.26	98.63	98.63	98.63	98.63	97.26	97.26	97.26	97.26	98.63	98.63	97.26	97.26	95.89	98.63	98.63	84.6
Molybdenum cofactor biosynthesis protein MoaE	fig|6666666.157468.peg.1030	100	100	100	96.62	96.62	96.62	96.62	96.62	96.62	96.62	95.27	95.27	95.27	95.27	96.62	96.62	95.27	95.95	96.62	96.6	94.59	82.47
Molybdopterin biosynthesis protein MoeA	fig|6666666.157468.peg.1031	100	100	100	97.98	97.98	97.98	97.73	97.73	97.73	97.73	97.72	97.72	97.72	97.73	97.47	96.72	97.73	97.47	97.22	99.49	97.73	0
CRISPR-associated protein Cas2	fig|6666666.157468.peg.1032	100	100	100	100	100	100	99.3	99.3	99.3	99.3	99.3	99.3	99.3	99.3	0	99.3	99.3	99.3	100	100	99.3	97.16
CRISPR-associated protein Cas1	fig|6666666.157468.peg.1033	100	100	100	99.32	99.32	99.32	97.64	97.64	97.64	97.64	97.64	97.64	97.64	97.64	0	97.97	97.64	100	98.31	97.97	96.96	97.93
CRISPR-associated protein, Csn1 family	fig|6666666.157468.peg.1034	100	100	100	99.29	99.29	99.29	99.08	99.08	99.08	98.81	99.08	99.08	97.06	99.08	0	95.04	98.98	98.99	99.29	0	97.37	99.22
Tgh102	fig|6666666.157468.peg.1037	100	100	100	0	0	0	0	0	0	0	0	0	0	0	0	0	0	0	0	0	0	84.44
Phosphoribosylformylglycinamidine cyclo-ligase (EC 6.3.3.1)	fig|6666666.157468.peg.1039	100	100	100	98.78	98.78	98.78	99.09	99.09	99.09	99.09	98.48	98.48	98.48	98.48	99.39	99.39	98.48	98.48	99.39	99.39	98.48	72.07
Dephospho-CoA kinase (EC 2.7.1.24)	fig|6666666.157468.peg.1040	100	100	100	96.52	96.52	96.52	97.51	97.51	97.51	97.51	96.52	96.52	96.52	96.52	97.01	99	96.52	96.52	97.01	99.5	95.02	89.02
Diaminopimelate epimerase (EC 5.1.1.7)	fig|6666666.157468.peg.1041	100	100	100	98.39	98.39	98.39	97.58	97.58	97.58	97.58	98.39	98.39	98.39	98.39	97.99	99.6	98.39	98.39	97.99	100	95.98	86.86
Glucose-6-phosphate isomerase (EC 5.3.1.9)	fig|6666666.157468.peg.1045	100	100	100	100	100	100	98.77	98.77	98.77	98.77	98.77	98.77	98.77	98.77	98.77	98.77	98.77	98.52	99.51	100	98.28	89.35
UTP--glucose-1-phosphate uridylyltransferase (EC 2.7.7.9)	fig|6666666.157468.peg.1046	100	100	100	99.64	99.64	99.64	99.64	99.64	99.64	99.64	99.64	99.64	99.64	99.64	99.64	98.54	99.64	99.64	99.64	100	97.42	88.55
Acetyl-coenzyme A synthetase (EC 6.2.1.1)	fig|6666666.157468.peg.1047	100	100	100	99.39	99.39	99.39	99.54	99.54	99.54	99.54	99.54	99.54	99.54	99.54	99.54	98.93	99.54	99.54	99.54	99.7	97.11	86.5
ABC-type tungstate transport system, ATP-binding protein	fig|6666666.157468.peg.1048	100	100	100	99.7	99.7	99.7	99.09	99.09	99.09	99.09	99.09	99.09	99.09	99.4	99.4	98.19	99.09	99.09	99.7	100	93.96	98.74
ABC-type tungstate transport system, permease protein	fig|6666666.157468.peg.1049	100	100	100	99.12	99.12	99.12	98.68	98.68	98.68	98.68	98.68	98.68	98.68	98.68	98.68	99.12	98.68	98.68	99.12	100	99.56	87.33
ABC-type tungstate transport system, periplasmic binding protein	fig|6666666.157468.peg.1050	100	100	100	99.26	99.26	99.26	99.63	99.63	99.63	99.63	99.63	99.63	99.63	99.63	99.63	98.51	99.63	99.63	99.26	100	95.17	85.16
Lactam utilization protein LamB	fig|6666666.157468.peg.1051	100	100	100	99.22	99.22	99.22	99.22	99.22	99.22	99.22	99.61	99.61	99.61	99.61	99.61	96.86	99.61	99.61	99.22	100	97.65	93.55
Allophanate hydrolase 2 subunit 1 (EC 3.5.1.54)	fig|6666666.157468.peg.1052	100	100	100	100	100	100	99.19	99.19	99.19	99.19	99.19	99.19	99.19	99.19	99.19	98.78	99.19	99.19	99.59	100	98.37	93.05
Allophanate hydrolase 2 subunit 2 (EC 3.5.1.54)	fig|6666666.157468.peg.1053	100	100	100	99.38	99.38	99.38	100	100	100	100	100	100	100	100	99.69	97.25	100	99.69	99.38	100	93.46	87.98
Arginine/ornithine antiporter ArcD	fig|6666666.157468.peg.1054	100	100	100	97.64	97.64	97.64	96.96	96.96	96.96	96.96	96.96	96.96	96.96	96.96	96.96	95.16	97.92	97.92	98.62	97.64	91.7	67.94
Aliphatic amidase AmiE (EC 3.5.1.4)	fig|6666666.157468.peg.1056	100	100	100	26.52	26.52	26.52	26.88	26.88	26.88	26.88	26.88	26.88	26.88	26.88	26.88	26.52	26.88	26.88	26.52	26.88	28.73	77.16
oxidoreductase, aldo/keto reductase family	fig|6666666.157468.peg.1057	100	100	100	0	0	0	0	0	0	0	0	0	0	0	0	0	0	0	0	0	0	96.53
MdaB protein homolog	fig|6666666.157468.peg.1059	100	100	100	100	100	100	100	100	100	100	100	100	100	100	100	99.48	100	100	100	99.48	99.48	71.12
Transcriptional regulator, HxlR family	fig|6666666.157468.peg.1060	100	100	100	100	100	100	100	92.68	100	100	100	100	100	100	43.75	100	100	100	95.41	93.58	0	75.96
Alcohol dehydrogenase (EC 1.1.1.1)	fig|6666666.157468.peg.1062	100	100	100	93.4	93.4	93.4	96.93	96.93	96.93	96.93	96.65	96.65	96.93	96.93	96.93	98.32	96.93	96.93	96.37	98.32	91.9	87.86
Type I restriction-modification system, restriction subunit R (EC 3.1.21.3)	fig|6666666.157468.peg.1063	100	100	100	0	0	0	0	0	0	0	0	0	0	0	0	0	0	0	99.13	0	69.59	88.06
RloF	fig|6666666.157468.peg.1064	100	100	100	0	0	0	0	0	0	0	36.56	36.56	0	0	38.36	0	0	0	87.52	0	36.56	71.01
Type I restriction-modification system, specificity subunit S (EC 3.1.21.3)	fig|6666666.157468.peg.1065	100	100	100	23.89	23.89	23.89	20.94	20.94	20.94	20.94	20.94	20.94	20.94	20.94	25.57	23.82	20.94	20.94	40.57	26.16	38.46	84.3
Type I restriction-modification system, DNA-methyltransferase subunit M (EC 2.1.1.72)	fig|6666666.157468.peg.1066	100	100	100	24.9	24.9	24.9	27.99	27.99	27.99	27.99	27.99	27.99	27.99	27.99	27.99	24.9	27.99	27.99	99.39	96.96	87.27	90.91
4-carboxymuconolactone decarboxylase (EC 4.1.1.44)	fig|6666666.157468.peg.1067	100	100	100	94.78	94.78	94.78	0	0	98.77	91.3	0	0	0	0	0	96.79	0	0	97.61	97.58	0	84.87
Rrf2-linked NADH-flavin reductase	fig|6666666.157468.peg.1070	100	100	100	0	0	0	100	100	100	100	100	100	100	100	99.53	0	100	100	0	0	0	80.87
Transcriptional regulator, HxlR family	fig|6666666.157468.peg.1071	100	100	100	44.09	44.09	44.09	100	100	100	100	100	100	100	100	100	44.09	100	100	43.3	44.33	0	90.99
Transporter	fig|6666666.157468.peg.1073	100	100	100	0	0	0	99.53	99.53	99.53	99.53	99.53	99.53	100	100	100	0	99.53	100	0	94.37	0	80.83
Arsenical resistance operon repressor	fig|6666666.157468.peg.1074	100	100	100	98	98	98	99.07	99.07	99.07	99.07	99.07	99.07	100	96.49	96.49	98.13	99.07	96.49	98.13	88.42	0	72.44
Phosphoenolpyruvate phosphomutase (EC 5.4.2.9)	fig|6666666.157468.peg.1078	100	0	0	0	0	0	0	0	97.98	0	0	0	0	0	0	0	0	0	0	0	0	84.21
ISCco1, transposase orfB	fig|6666666.157468.peg.1080	100	100	100	97.56	97.56	97.56	100	100	100	100	100	100	100	0	0	97.56	100	97.56	0	0	0	99.72
ISCco1, transposase orfB	fig|6666666.157468.peg.1081	100	100	100	0	0	0	100	100	100	100	0	0	0	0	0	92.86	100	92.86	0	0	0	94.48
ISCco1, transposase orfB	fig|6666666.157468.peg.1082	100	100	100	100	100	100	100	100	100	100	100	100	100	0	0	99.14	100	98.28	0	0	35.05	98.27
Ferric siderophore transport system, periplasmic binding protein TonB	fig|6666666.157468.peg.1083	100	100	100	100	100	100	97.41	97.41	97.41	97.41	97.41	97.41	97.41	100	40.77	100	97.41	97.84	40.77	100	89.27	96.04
Ferric receptor CfrA	fig|6666666.157468.peg.1085	100	100	100	93.87	93.87	93.87	97.56	97.56	97.56	97.04	97.56	97.56	97.56	94.11	35.5	93.29	97.56	96.12	35.67	96.41	90.17	87.31
Heat-inducible transcription repressor HrcA	fig|6666666.157468.peg.1086	100	100	100	100	100	100	100	100	100	100	100	100	100	99.62	93.54	100	100	99.24	93.54	100	82.13	94.09
Heat shock protein GrpE	fig|6666666.157468.peg.1087	100	100	100	99.43	99.43	99.43	91.48	91.48	91.48	91.48	91.48	91.48	91.48	91.48	89.2	99.43	91.48	91.48	89.2	99.43	87.5	88.17
Chaperone protein DnaK	fig|6666666.157468.peg.1088	100	100	100	99.52	99.52	99.52	99.68	99.68	99.68	99.68	99.68	99.68	99.68	99.68	99.68	99.68	99.68	99.68	99.84	99.84	99.04	92
Outer membrane protein romA	fig|6666666.157468.peg.1089	100	100	100	97.32	97.32	97.32	97.94	97.94	97.94	97.65	97.94	97.94	97.94	97.94	96.42	96.42	97.94	97.94	96.12	99.38	93.22	61.54
methyltransferase FkbM family	fig|6666666.157468.peg.1091	100	100	100	0	0	0	0	0	0	0	0	0	0	0	0	0	0	0	0	0	94.66	67.14
Aspartate aminotransferase (EC 2.6.1.1)	fig|6666666.157468.peg.1092	100	100	100	97.43	97.43	97.43	97.69	97.69	97.69	97.69	97.69	97.69	97.69	97.69	97.43	96.92	97.69	97.69	97.43	99.23	95.89	67.54
Serine acetyltransferase (EC 2.3.1.30)	fig|6666666.157468.peg.1093	100	100	100	98.58	98.58	98.58	99.53	99.53	99.53	99.53	99.53	99.53	99.53	99.53	99.06	99.06	99.53	99.53	99.06	100	95.75	93.54
Arginine decarboxylase (EC 4.1.1.19)	fig|6666666.157468.peg.1094	100	100	100	99.34	99.34	99.34	100	100	100	100	100	100	100	100	99.34	99.34	100	100	99.34	99.84	98.52	84.35
Histidyl-tRNA synthetase (EC 6.1.1.21)	fig|6666666.157468.peg.1095	100	100	100	91.18	91.18	91.18	99.26	99.26	99.26	99.26	99.02	99.02	99.26	99.26	91.18	91.18	99.26	99.26	91.18	99.26	90.2	94.08
Thymidylate kinase (EC 2.7.4.9)	fig|6666666.157468.peg.1096	100	100	100	98.44	98.44	98.44	99.48	99.48	99.48	99.48	98.96	98.96	99.48	99.48	98.44	98.44	99.48	99.48	98.44	99.48	96.35	96.9
Phosphopantetheine adenylyltransferase (EC 2.7.7.3)	fig|6666666.157468.peg.1097	100	100	100	100	100	100	100	100	100	100	100	100	100	100	100	100	100	100	99.37	100	100	85.98
UbiX family decarboxylase associated with menaquinone via futalosine	fig|6666666.157468.peg.1098	100	100	100	98.4	98.4	98.4	98.93	98.93	98.93	98.93	98.93	98.93	98.93	98.93	97.86	97.86	98.93	98.93	97.86	98.93	94.65	88.73
Flagellar basal-body P-ring formation protein FlgA	fig|6666666.157468.peg.1099	100	100	100	99.09	99.09	99.09	99.55	99.55	99.55	99.55	99.55	99.55	99.55	99.55	99.09	99.55	99.55	99.55	99.55	99.55	97.27	90.36
Methionine ABC transporter substrate-binding protein	fig|6666666.157468.peg.1100	100	100	100	99.61	99.61	99.61	100	100	100	100	100	100	100	100	98.84	99.22	100	100	98.84	100	97.67	0
Methionine ABC transporter substrate-binding protein	fig|6666666.157468.peg.1101	100	100	100	98.83	98.83	98.83	98.83	98.83	98.83	98.83	98.83	98.83	98.83	98.83	99.22	99.22	98.83	98.83	99.22	98.83	98.44	86.24
Methionine ABC transporter substrate-binding protein	fig|6666666.157468.peg.1102	100	100	100	99.22	99.22	99.22	99.22	99.22	99.22	99.22	99.22	99.22	99.22	99.22	98.83	98.83	99.22	99.22	98.83	98.83	98.44	82.27
Methionine ABC transporter permease protein	fig|6666666.157468.peg.1103	100	100	100	100	100	100	100	100	100	100	100	100	100	100	98.35	98.68	100	100	98.35	100	98.35	80.43
Methionine ABC transporter ATP-binding protein	fig|6666666.157468.peg.1104	100	100	100	99.7	99.7	99.7	99.7	99.7	99.7	99.38	99.7	99.7	99.7	99.7	99.11	99.4	99.7	99.7	99.11	99.7	98.81	77.23
Valyl-tRNA synthetase (EC 6.1.1.9)	fig|6666666.157468.peg.1105	100	100	100	99.08	99.08	99.08	99.08	99.08	99.08	25	99.08	99.08	99.08	98.97	99.31	98.85	99.08	99.08	99.31	98.97	97.47	90.36
ATP-dependent DNA helicase UvrD/PcrA/Rep, epsilon proteobacterial type 1	fig|6666666.157468.peg.1107	100	100	100	99.41	99.41	99.41	99.85	99.85	99.85	99.85	99.85	99.85	99.85	99.85	99.41	99.85	99.85	99.85	99.7	99.7	97.78	90.66
Major antigenic peptide PEB2	fig|6666666.157468.peg.1108	100	100	100	98.78	98.78	98.78	97.97	97.97	97.97	97.97	97.97	97.97	97.97	97.97	99.19	97.56	97.97	97.56	99.19	98.78	86.67	89.47
Thiol peroxidase, Tpx-type (EC 1.11.1.15)	fig|6666666.157468.peg.1109	100	100	100	100	100	100	99.43	99.43	99.43	99.43	99.43	99.43	99.43	99.43	100	99.43	99.43	99.43	100	100	97.55	78.61
Periplasmic nitrate reductase precursor (EC 1.7.99.4)	fig|6666666.157468.peg.1110	100	100	100	99.89	99.89	99.89	99.89	99.89	99.89	99.89	99.89	99.89	99.89	99.89	99.46	99.89	99.89	99.89	99.78	99.89	92	94.63
Ferredoxin-type protein NapG (periplasmic nitrate reductase)	fig|6666666.157468.peg.1111	100	100	100	97.97	97.97	97.97	98.78	98.78	98.78	98.78	98.78	98.78	98.78	98.78	98.37	98.78	98.78	98.78	99.19	98.78	97.1	99.71
Polyferredoxin NapH (periplasmic nitrate reductase)	fig|6666666.157468.peg.1112	100	100	100	99.23	99.23	99.23	100	100	100	100	100	100	100	100	99.23	100	100	100	99.61	99.61	95	88.67
Nitrate reductase cytochrome c550-type subunit	fig|6666666.157468.peg.1113	100	100	100	98.84	98.84	98.84	99.42	99.42	99.42	99.42	99.42	99.42	99.42	99.42	98.84	99.42	99.42	99.42	99.42	98.84	0	85.43
Periplasmic nitrate reductase component NapL	fig|6666666.157468.peg.1114	100	100	100	99.01	99.01	99.01	99.34	99.34	99.34	99.34	99.34	99.34	99.34	99.34	98.68	98.68	99.34	99.34	98.68	98.36	95.77	78.18
periplasmic diheme c-type cytochrome, NapB	fig|6666666.157468.peg.1115	100	100	100	100	100	100	100	100	100	0	100	100	100	100	100	100	100	100	100	99.11	96.43	78.74
Small hydrophobic protein	fig|6666666.157468.peg.1116	100	100	100	100	100	100	98.25	98.25	98.25	98.25	98.25	98.25	98.25	98.25	98.25	100	98.25	98.25	98.25	98.25	96.49	81.31
tRNA nucleotidyltransferase (EC 2.7.7.21) (EC 2.7.7.25)	fig|6666666.157468.peg.1119	100	100	100	98.54	98.21	98.54	97.67	97.31	97.31	97.67	97.67	97.67	97.67	97.67	97.67	97.96	97.67	97.67	97.96	98.25	96.21	82.58
Formyltetrahydrofolate deformylase (EC 3.5.1.10)	fig|6666666.157468.peg.1120	100	100	100	98.91	98.91	98.91	99.64	99.64	99.64	99.64	99.64	99.64	99.64	99.64	99.64	99.64	99.64	99.64	99.64	99.27	97.45	65.12
Cysteine desulfurase (EC 2.8.1.7)	fig|6666666.157468.peg.1121	100	100	100	98.82	98.82	98.82	98.82	98.82	98.82	98.82	98.82	98.82	98.82	98.82	98.82	99.05	98.82	98.58	99.05	98.82	98.58	81.78
Flagellar sensory histidine kinase FlgS	fig|6666666.157468.peg.1123	100	100	100	99.71	99.71	99.71	99.71	99.71	99.71	99.71	99.71	99.71	99.71	99.71	100	99.71	99.71	99.71	99.71	99.71	99.71	77.08
UDP-N-acetylmuramoylalanyl-D-glutamyl-2,6-diaminopimelate--D-alanyl-D-alanine ligase (EC 6.3.2.10)	fig|6666666.157468.peg.1125	100	100	100	98.11	98.11	98.11	97.89	97.89	97.89	97.89	97.89	97.89	97.89	97.89	97.89	98.53	97.89	97.89	98.11	97.89	95.16	91.37
2-hydroxy-6-oxohepta-2,4-dienoate hydrolase	fig|6666666.157468.peg.1126	100	100	100	97.07	97.07	97.07	96.65	96.65	96.65	96.65	96.65	96.65	96.65	96.65	96.23	98.33	96.65	96.65	95.4	96.23	94.98	84.93
D-alanine--D-alanine ligase (EC 6.3.2.4)	fig|6666666.157468.peg.1128	100	100	100	97.98	97.98	97.98	99.13	99.13	99.13	99.13	99.42	99.42	99.13	99.42	98.27	98.84	99.13	99.42	98.27	98.27	96.53	86.94
Holliday junction DNA helicase RuvA	fig|6666666.157468.peg.1129	100	100	100	98.36	98.36	98.36	98.91	98.91	98.91	98.91	98.91	98.91	98.91	98.91	99.45	100	98.91	98.91	99.45	99.45	98.35	85.01
Proposed peptidoglycan lipid II flippase MurJ	fig|6666666.157468.peg.1131	100	100	100	99.79	99.79	99.79	99.59	99.59	99.59	99.59	99.59	99.59	99.59	99.59	99.79	99.38	99.59	99.59	99.79	99.79	97.93	87.8
Cysteinyl-tRNA synthetase (EC 6.1.1.16)	fig|6666666.157468.peg.1132	100	100	100	99.35	99.35	99.35	98.92	98.92	98.92	98.92	98.92	98.92	98.92	98.92	98.7	99.35	98.92	98.92	98.48	98.7	97.62	96.64
Phospholipid-lipopolysaccharide ABC transporter	fig|6666666.157468.peg.1133	100	100	100	99.83	99.83	99.83	100	100	100	100	100	100	100	100	98.96	100	100	99.83	99.65	98.96	98.09	90.71
Dihydroorotate dehydrogenase (EC 1.3.3.1)	fig|6666666.157468.peg.1134	100	100	100	98.86	98.86	98.86	97.73	97.73	97.73	97.73	97.73	97.73	97.73	97.73	97.44	98.3	97.73	97.73	98.58	97.44	96.59	80
4-hydroxy-tetrahydrodipicolinate synthase (EC 4.3.3.7)	fig|6666666.157468.peg.1136	100	100	100	99.33	99.33	99.33	98.99	98.99	98.99	98.99	98.99	98.99	98.99	98.99	98.66	100	98.99	98.99	100	98.66	97.99	89.46
3-oxoacyl-[acyl-carrier protein] reductase (EC 1.1.1.100)	fig|6666666.157468.peg.1137	100	100	100	99.23	99.23	99.23	99.61	99.61	99.61	28.34	99.61	99.61	99.61	99.23	99.61	99.23	99.23	99.61	99.61	99.23	98.46	82.68
Small hydrophobic protein	fig|6666666.157468.peg.1138	100	100	100	100	100	100	99.01	99.01	99.01	99.01	99.01	99.01	100	99.01	100	99.01	99.01	99.01	99.01	100	98.02	99.32
Hydroxyacylglutathione hydrolase (EC 3.1.2.6)	fig|6666666.157468.peg.1139	100	100	100	92.42	92.42	92.42	93.94	93.94	93.94	93.94	93.94	93.94	93.43	93.94	93.43	93.43	93.94	93.94	93.43	91.92	91.41	100
NAD synthetase (EC 6.3.1.5)	fig|6666666.157468.peg.1140	100	100	100	99.59	99.59	99.59	98.37	98.37	98.37	98.37	99.19	99.19	98.37	98.37	98.78	98.78	98.37	98.37	98.78	98.78	96.34	83.16
Tetraacyldisaccharide 4'-kinase (EC 2.7.1.130)	fig|6666666.157468.peg.1141	100	100	100	100	100	100	98.7	98.7	98.7	98.7	97.08	97.08	98.7	98.7	98.05	97.73	98.7	98.7	97.73	97.73	95.45	0
Threonine synthase (EC 4.2.3.1)	fig|6666666.157468.peg.1142	100	100	100	100	100	100	98.72	98.72	98.72	98.72	98.72	98.72	98.72	98.72	98.72	98.45	98.72	98.72	98.45	99.15	96.17	82.61
3-deoxy-manno-octulosonate cytidylyltransferase (EC 2.7.7.38)	fig|6666666.157468.peg.1143	100	100	100	99.58	99.58	99.58	97.91	97.91	97.91	97.91	97.91	97.91	97.91	97.91	98.33	98.33	97.91	97.91	98.33	99.16	96.15	92.15
Glutamine-binding periplasmic protein	fig|6666666.157468.peg.1146	100	100	100	99.61	99.61	99.61	91.8	91.8	91.8	78.26	91.8	91.8	91.8	91.8	99.22	99.22	91.8	91.41	91.41	99.61	90.62	95.74
Flagellar biosynthesis protein FliP	fig|6666666.157468.peg.1147	100	100	100	100	100	100	100	100	100	100	99.59	99.59	100	100	99.59	99.59	100	100	100	100	98.77	0
N-acetylglucosamine-1-phosphate uridyltransferase (EC 2.7.7.23) / Glucosamine-1-phosphate N-acetyltransferase (EC 2.3.1.157)	fig|6666666.157468.peg.1148	100	100	100	99.07	99.07	99.07	99.53	99.53	99.53	99.53	99.3	99.3	99.53	99.53	99.53	98.6	99.53	99.53	99.77	98.6	95.34	86.13
Phosphopantothenoylcysteine decarboxylase (EC 4.1.1.36) / Phosphopantothenoylcysteine synthetase (EC 6.3.2.5)	fig|6666666.157468.peg.1149	100	100	100	97.66	97.66	97.66	97.4	97.4	97.4	97.4	97.4	97.4	99.48	97.4	97.66	97.66	97.4	97.4	97.92	98.44	96.09	93.46
Undecaprenyl diphosphate synthase (EC 2.5.1.31)	fig|6666666.157468.peg.1151	100	100	100	99.55	99.55	99.55	99.55	99.55	99.55	99.55	99.55	99.55	99.55	99.55	99.55	99.55	99.55	99.55	99.55	99.55	97.75	85.5
Leader peptidase (Prepilin peptidase) (EC 3.4.23.43)	fig|6666666.157468.peg.1152	100	100	100	98.45	97.98	98.45	97.87	97.87	97.87	97.87	98.84	98.84	98.84	98.84	98.45	97.57	98.84	98.45	97.57	99.61	96.12	86.9
tRNA pseudouridine synthase A (EC 4.2.1.70)	fig|6666666.157468.peg.1154	100	100	100	98.75	98.75	98.75	100	100	100	100	100	100	100	100	97.08	97.5	100	100	97.5	98.75	97.08	83.54
Threonine dehydratase (EC 4.3.1.19)	fig|6666666.157468.peg.1155	100	100	100	99.5	99.5	99.5	97.52	97.52	97.52	97.52	97.77	97.77	97.77	97.77	99.26	99.26	97.77	99.01	99.42	99.75	98.76	98.63
CoA-binding domain protein	fig|6666666.157468.peg.1156	100	100	100	99.27	99.27	99.27	97.08	97.08	97.08	92.98	97.08	97.08	97.81	97.08	99.27	100	97.08	98.23	100	98.54	95.83	90.06
tRNA (uracil(54)-C5)-methyltransferase (EC 2.1.1.35)	fig|6666666.157468.peg.1158	100	100	100	98.04	98.04	98.04	98.04	98.04	98.04	98.04	98.04	98.04	98.32	97.76	99.44	100	98.04	98.04	100	97.76	96.64	91.3
Na+/H+ antiporter	fig|6666666.157468.peg.1159	100	100	100	98.09	98.09	98.09	98.27	98.27	98.27	98.27	98.27	98.27	98.27	98.27	98.96	99.13	98.27	98.27	99.13	98.44	98.27	65.93
Oxidoreductase	fig|6666666.157468.peg.1160	100	100	100	98.39	98.39	98.39	97.99	97.99	97.99	97.99	97.99	97.99	97.99	97.99	98.39	98.8	97.99	97.99	98.39	98.8	97.99	92.21
Aconitate hydratase 2 (EC 4.2.1.3)	fig|6666666.157468.peg.1162	100	100	100	99.53	99.53	99.53	99.29	99.29	99.29	99.29	99.06	99.06	99.06	99.06	99.06	99.06	99.06	99.06	99.06	99.53	98.11	50
Methylated-DNA--protein-cysteine methyltransferase (EC 2.1.1.63)	fig|6666666.157468.peg.1163	100	100	100	98.67	98.67	98.67	98.67	98.67	98.67	98.67	98.67	98.67	98.67	98.67	96.67	99.33	98.67	98.67	99.33	97.33	96	96.76
Methionyl-tRNA synthetase (EC 6.1.1.10)	fig|6666666.157468.peg.1165	100	100	100	98.57	98.57	98.57	98.41	98.41	98.41	97.29	98.25	98.25	98.25	98.25	98.09	98.41	98.25	98.25	98.25	98.73	94.9	80.2
Fructose-1,6-bisphosphatase, type I (EC 3.1.3.11)	fig|6666666.157468.peg.1167	100	100	100	99.29	99.29	99.29	99.29	99.29	99.29	99.29	99.29	99.29	99.29	99.64	98.93	98.93	99.29	99.29	98.93	99.29	97.14	87.57
Molybdopterin-guanine dinucleotide biosynthesis protein MobB	fig|6666666.157468.peg.1168	100	100	100	99.39	99.39	99.39	100	100	100	100	100	100	100	100	96.93	96.93	100	100	96.93	96.32	97.55	94.5
Soluble lytic murein transglycosylase precursor (EC 3.2.1.-)	fig|6666666.157468.peg.1169	100	100	100	99.82	99.82	99.82	99.45	99.45	99.45	99.45	99.26	99.26	99.45	99.45	99.45	99.26	99.45	99.45	99.08	99.63	97.04	0
Integral membrane protein YggT, involved in response to extracytoplasmic stress (osmotic shock)	fig|6666666.157468.peg.1170	100	100	100	100	100	100	100	100	100	100	100	100	100	100	0	100	100	100	100	98.92	98.78	90.18
Glutamyl-tRNA(Gln) synthetase (EC 6.1.1.24)	fig|6666666.157468.peg.1171	100	100	100	96.52	96.52	96.52	98.84	98.84	98.84	98.84	96.75	96.75	98.84	98.14	97.45	97.45	98.84	98.84	97.45	98.84	96.06	89.47
Phosphatidylserine decarboxylase (EC 4.1.1.65)	fig|6666666.157468.peg.1173	100	100	100	96.62	96.62	96.62	97.74	97.74	97.74	97.74	98.12	98.12	97.74	98.12	98.12	96.62	97.74	98.12	98.87	99.62	94.36	0
Uncharacterized homolog of the cytoplasmic domain of flagellar protein FhlB	fig|6666666.157468.peg.1174	100	100	100	100	100	100	100	100	100	100	100	100	100	100	100	100	100	100	100	100	98.92	96.35
Transmembrane transport protein	fig|6666666.157468.peg.1176	100	100	100	98.96	98.96	98.96	99.22	99.22	99.22	99.22	99.22	99.22	99.22	98.96	98.19	98.96	99.22	99.22	98.7	98.96	98.19	0
ATP synthase protein I	fig|6666666.157468.peg.1178	100	100	100	99.08	99.08	99.08	100	100	100	100	100	100	99.08	100	100	100	100	100	100	100	98.17	75.23
Glutamate-1-semialdehyde aminotransferase (EC 5.4.3.8)	fig|6666666.157468.peg.1179	100	100	100	99.29	99.29	99.29	99.53	99.53	99.53	99.53	99.53	99.53	99.53	99.53	99.53	99.06	99.53	99.53	99.53	99.53	98.82	97.62
Methylenetetrahydrofolate dehydrogenase (NADP+) (EC 1.5.1.5) / Methenyltetrahydrofolate cyclohydrolase (EC 3.5.4.9)	fig|6666666.157468.peg.1181	100	100	100	98.58	98.58	98.58	98.94	98.94	98.94	98.94	98.94	98.94	99.65	99.29	99.65	99.65	98.94	99.65	99.65	98.94	98.58	85.33
Signal peptidase I (EC 3.4.21.89)	fig|6666666.157468.peg.1182	100	100	100	98.94	98.94	98.94	99.65	99.65	99.65	99.65	99.65	99.65	98.94	99.65	99.65	99.29	99.65	99.65	99.65	98.94	95.41	85.06
Molybdopterin biosynthesis protein MoeA	fig|6666666.157468.peg.1183	100	100	100	98.45	98.45	98.45	99.74	99.74	99.74	99.74	99.74	99.74	97.15	99.22	98.96	96.37	99.74	99.74	99.22	98.45	91.97	96.8
UDP-N-acetylglucosamine 1-carboxyvinyltransferase (EC 2.5.1.7)	fig|6666666.157468.peg.1184	100	100	100	99.52	99.52	99.52	98.8	98.8	98.8	98.56	98.8	98.8	96.17	100	100	99.04	98.8	98.8	100	99.28	98.33	85.23
Permease of the drug/metabolite transporter (DMT) superfamily	fig|6666666.157468.peg.1186	100	100	100	0	0	0	0	0	0	0	0	0	0	100	99.66	0	0	0	100	98.62	98.58	98.57
Para-aminobenzoate synthase, amidotransferase component (EC 2.6.1.85)	fig|6666666.157468.peg.1187	100	100	100	98.4	98.4	98.4	99.47	99.47	99.47	99.47	99.47	99.47	92.02	98.4	98.4	98.94	99.47	99.47	99.47	98.94	98.4	88.06
Para-aminobenzoate synthase, aminase component (EC 2.6.1.85) / Aminodeoxychorismate lyase (EC 4.1.3.38)	fig|6666666.157468.peg.1188	100	100	100	98.48	98.48	98.48	99.33	99.33	99.33	99.16	99.33	99.33	96.46	98.99	99.33	98.32	99.33	99.33	98.65	98.48	97.98	99.42
Periplasmic thiol:disulfide interchange protein, DsbA-like	fig|6666666.157468.peg.1190	100	100	100	96.82	96.82	96.82	92.94	92.94	92.94	92.94	92.94	92.94	92.94	92.94	97.27	97.27	92.94	92.94	97.27	99.55	92.73	66.8
Inner membrane thiol:disulfide oxidoreductase, DsbB-like	fig|6666666.157468.peg.1191	100	100	100	94.92	94.92	94.92	98.85	98.85	98.85	98.85	98.47	98.47	98.85	98.85	94.7	94.7	98.85	98.47	94.7	99.62	98.47	88.1
arylsulfate sulfotransferase	fig|6666666.157468.peg.1194	100	100	100	88.75	88.75	88.75	98.94	98.94	98.94	98.94	98.94	98.94	98.94	0	88.75	88.75	98.94	98.94	87.5	0	97.87	87.96
arylsulfate sulfotransferase	fig|6666666.157468.peg.1195	100	100	100	0	0	0	98.21	98.21	98.21	98.21	98.21	98.21	98.21	0	0	0	98.21	98.21	0	0	98.21	72.73
Periplasmic thiol:disulfide interchange protein, DsbA-like	fig|6666666.157468.peg.1196	100	100	100	95.77	95.77	95.77	97.18	97.18	97.18	97.18	97.18	97.18	97.18	97.18	97.18	97.18	97.18	97.18	96.71	99.06	97.18	96.9
Cytochrome c family protein	fig|6666666.157468.peg.1197	100	100	100	95.71	95.71	95.71	97.73	97.14	97.73	97.73	100	100	97.73	100	98.4	98.4	97.14	100	98.4	39.36	94.05	73.71
Cytochrome c family protein	fig|6666666.157468.peg.1198	100	100	100	100	100	100	97.9	97.9	97.9	97.9	98.46	98.46	97.9	98.46	98.69	98.69	97.9	98.46	98.69	0	95.56	95.39
3'-to-5' oligoribonuclease B, Bacillus type	fig|6666666.157468.peg.1202	100	100	100	100	100	100	98.85	98.85	98.85	98.85	97.99	97.99	98.85	99.71	98.85	98.85	98.85	99.71	98.85	99.71	97.99	77.84
Flagellar biosynthesis protein FlhA	fig|6666666.157468.peg.1203	100	100	100	99.59	99.59	99.59	99.72	99.72	99.72	99.72	99.59	99.59	99.72	99.86	99.72	99.72	99.72	99.86	99.72	99.72	99.03	72.22
Rrf2 family transcriptional regulator	fig|6666666.157468.peg.1204	100	100	100	100	100	100	100	100	100	100	99.26	99.26	100	100	100	100	100	100	100	100	100	88.55
SSU ribosomal protein S15p (S13e)	fig|6666666.157468.peg.1205	100	100	100	100	100	100	100	100	100	100	98.89	98.89	100	100	100	100	100	100	100	100	98.89	98.18
Cell division protein FtsK	fig|6666666.157468.peg.1206	100	100	100	99.89	99.89	99.89	97.24	97.24	97.24	97.25	96.81	96.81	97.24	97.15	99.89	97.67	97.25	97.36	99.89	99.47	95.77	86.8
Flagellar hook-associated protein FlgL	fig|6666666.157468.peg.1207	100	100	100	96.67	96.67	96.67	99.87	99.87	99.87	99.87	96.13	96.13	99.73	99.87	99.33	96.93	99.73	99.87	96.53	97.47	92.14	99.45
COG0488: ATPase components of ABC transporters with duplicated ATPase domains	fig|6666666.157468.peg.1208	100	100	100	98.29	98.29	98.29	99.69	99.69	99.69	99.69	98.13	98.13	99.69	99.69	97.98	98.91	99.69	99.69	97.98	99.38	96.42	96.91
Two-component system histidine kinase	fig|6666666.157468.peg.1209	100	100	100	98.37	98.37	98.37	99.53	99.53	99.53	99.53	96.97	96.97	99.53	99.53	97.44	97.67	99.53	99.53	97.67	99.3	96.04	84.83
Two-component system response regulator	fig|6666666.157468.peg.1210	100	100	100	100	100	100	100	100	100	100	96.86	96.82	100	100	98.65	97.72	99.54	99.54	98.21	100	96.82	97.85
D-3-phosphoglycerate dehydrogenase (EC 1.1.1.95)	fig|6666666.157468.peg.1211	100	100	100	99.81	99.81	99.81	100	100	100	100	98.29	98.29	100	100	99.43	99.62	100	100	99.81	100	98.48	80.23
SSU ribosomal protein S1p	fig|6666666.157468.peg.1213	100	100	100	98.38	98.38	98.38	98.56	98.56	98.56	98.56	98.2	98.2	98.56	98.56	98.56	98.92	98.56	98.56	98.56	99.28	95.5	89.17
4-hydroxy-3-methylbut-2-enyl diphosphate reductase (EC 1.17.1.2)	fig|6666666.157468.peg.1214	100	100	100	99.64	99.64	99.64	98.92	98.92	98.92	98.92	98.92	98.92	98.92	98.92	99.64	99.28	98.92	98.92	99.28	99.28	96.75	64.02
5-Enolpyruvylshikimate-3-phosphate synthase (EC 2.5.1.19)	fig|6666666.157468.peg.1215	100	100	100	99.53	99.53	99.53	99.77	99.77	99.77	99.77	99.53	99.53	99.77	99.77	99.53	98.13	99.77	99.77	99.77	99.53	96.26	0
Phenylalanyl-tRNA synthetase beta chain (EC 6.1.1.20)	fig|6666666.157468.peg.1216	100	100	100	99.35	99.35	99.35	99.35	99.35	99.35	99.35	99.09	99.09	99.48	99.48	98.97	98.97	99.09	99.09	99.22	99.09	97.67	79.35
Phenylalanyl-tRNA synthetase alpha chain (EC 6.1.1.20)	fig|6666666.157468.peg.1217	100	100	100	100	100	100	100	100	100	100	100	100	100	100	100	100	100	100	100	100	98.48	94.51
HIT family protein	fig|6666666.157468.peg.1218	100	100	100	99.17	99.17	99.17	99.17	99.17	99.17	99.17	99.17	99.17	99.17	99.17	100	100	99.17	99.17	100	99.17	99.17	97.97
DJ-1/YajL/PfpI superfamily, includes chaperone protein YajL (former ThiJ), parkinsonism-associated protein DJ-1, peptidases PfpI, Hsp31	fig|6666666.157468.peg.1219	100	100	100	99.47	99.47	99.47	99.47	99.47	99.47	99.47	99.47	99.47	99.47	99.47	99.47	99.47	99.47	99.47	99.47	99.47	97.88	87.9
Small hydrophobic protein	fig|6666666.157468.peg.1220	100	100	100	100	100	100	97.92	97.92	97.92	97.92	97.92	97.92	97.92	97.92	100	100	97.92	97.92	100	97.92	100	80.35
tRNA (cytidine(34)-2'-O)-methyltransferase (EC 2.1.1.207)	fig|6666666.157468.peg.1224	100	100	100	98.06	98.06	98.06	99.35	99.35	99.35	99.35	99.35	99.35	99.35	99.35	98.06	97.42	99.35	99.35	98.06	100	96.13	90.78
Alanine racemase (EC 5.1.1.1)	fig|6666666.157468.peg.1225	100	100	100	99.39	99.39	99.39	99.09	99.09	99.09	99.09	99.09	99.09	99.09	99.09	98.17	98.48	99.09	99.09	98.17	98.48	97.26	79
Copper metallochaperone, bacterial analog of Cox17 protein	fig|6666666.157468.peg.1229	100	100	100	99.28	99.28	99.28	99.28	99.28	99.28	99.28	99.28	99.28	99.28	99.28	99.28	99.28	99.28	99.28	99.28	99.28	97.12	74.49
Cysteine synthase (EC 2.5.1.47)	fig|6666666.157468.peg.1232	100	100	100	99.33	99.33	99.33	99.67	99.67	99.67	99.67	99.67	99.67	99.67	99.67	99.6	99.51	99.67	100	99.33	100	95.32	82.52
DNA-binding protein HU ## epsilon-proteobacterial type	fig|6666666.157468.peg.1233	100	100	100	98.98	98.98	98.98	100	100	100	100	100	100	100	100	100	0	100	0	100	100	100	92.09
Campylobacter invasion antigen B (CiaB)	fig|6666666.157468.peg.1234	100	100	100	99.18	99.18	99.18	99.67	99.67	99.67	99.67	99.51	99.51	99.67	99.67	99.02	99.34	99.67	99.62	99.02	99.67	98.85	98.89
Acyl-CoA thioester hydrolase (EC 3.1.2.-)	fig|6666666.157468.peg.1235	100	100	100	100	100	100	99.27	99.27	99.27	99.27	98.54	98.54	99.27	99.27	100	100	99.27	99.27	100	100	98.54	0
Carbon starvation protein A	fig|6666666.157468.peg.1237	100	100	100	99.29	99.29	99.29	98.58	98.58	98.58	97.34	98.86	98.86	98.72	98.86	99.57	99.15	98.72	98.86	99.26	99.86	97.72	100
Ribose-phosphate pyrophosphokinase (EC 2.7.6.1)	fig|6666666.157468.peg.1238	100	100	100	99.68	99.68	99.68	99.68	99.68	99.68	99.68	100	100	100	100	99.68	100	100	100	99.68	100	99.35	95.02
Major cell-binding factor precursor PebA	fig|6666666.157468.peg.1241	100	100	100	99.61	99.61	99.61	100	100	100	100	100	100	100	100	99.61	98.84	100	100	98.84	98.84	98.84	89.51
Amino-acid ABC transporter ATP-binding protein PebC	fig|6666666.157468.peg.1242	100	100	100	100	100	100	100	100	100	100	100	100	100	100	99.59	99.17	100	100	99.59	100	99.59	0
Chemotaxis protein methyltransferase CheR (EC 2.1.1.80)	fig|6666666.157468.peg.1243	100	100	100	100	100	100	100	100	100	100	100	100	100	100	99.62	99.24	100	100	99.62	100	98.85	90.41
Chemotaxis response regulator protein-glutamate methylesterase CheB (EC 3.1.1.61)	fig|6666666.157468.peg.1244	100	100	100	100	100	100	100	100	100	100	100	100	100	100	99.46	97.28	100	100	99.46	100	98.37	88.05
Ribose 5-phosphate isomerase B (EC 5.3.1.6)	fig|6666666.157468.peg.1245	100	100	100	98.62	98.62	98.62	99.31	99.31	99.31	99.31	98.62	98.62	98.62	98.62	100	99.31	98.62	98.62	100	98.62	97.24	82.35
FIG01145279: membrane protein	fig|6666666.157468.peg.1246	100	100	100	100	100	100	100	100	100	100	100	100	100	100	100	100	100	100	100	100	100	90.87
Adenine phosphoribosyltransferase (EC 2.4.2.7)	fig|6666666.157468.peg.1247	100	100	100	99.45	99.45	99.45	97.8	97.8	97.8	97.8	97.8	97.8	97.8	97.8	97.8	97.25	97.8	97.8	97.8	98.35	98.35	86.83
FIG139438: lipoprotein B	fig|6666666.157468.peg.1248	100	100	100	100	100	100	99.49	99.49	99.49	99.49	99.49	99.49	99.49	99.49	100	100	99.49	99.49	98.99	99.49	98.48	99.12
Cytosol aminopeptidase PepA (EC 3.4.11.1)	fig|6666666.157468.peg.1249	100	100	100	99.59	99.59	99.59	98.76	98.76	98.76	98.76	98.76	98.76	98.76	98.76	97.31	97.93	98.76	98.76	97.1	98.55	97.52	85
GTP-binding and nucleic acid-binding protein YchF	fig|6666666.157468.peg.1250	100	100	100	99.73	99.73	99.73	99.73	99.73	99.73	99.73	100	100	99.73	99.73	99.73	99.73	99.73	100	99.46	99.73	99.18	79.77
Argininosuccinate lyase (EC 4.3.2.1)	fig|6666666.157468.peg.1251	100	100	100	99.78	99.78	99.78	99.13	99.13	99.13	99.13	98.91	98.91	99.13	98.91	97.39	96.96	99.13	98.91	97.83	98.04	96.09	85.26
Phosphoenolpyruvate carboxykinase [ATP] (EC 4.1.1.49)	fig|6666666.157468.peg.1252	100	100	100	99.62	99.62	99.62	99.81	99.81	99.81	99.81	99.81	99.81	99.81	99.81	98.09	97.9	99.81	99.81	98.09	99.43	97.71	90.18
Pyruvate carboxylase subunit B (biotin-containing) (EC 6.4.1.1)	fig|6666666.157468.peg.1253	100	100	100	97.33	97.33	97.33	97.5	97.5	97.5	97.56	97.33	97.33	97.5	97.5	97.83	97.5	97.5	97.33	98	99.83	96.49	91.7
ATP synthase F0 sector subunit c	fig|6666666.157468.peg.1256	100	100	100	98.21	98.21	98.21	98.21	98.21	98.21	98.21	98.21	98.21	98.21	98.21	99.11	99.11	98.21	98.21	99.11	100	98.21	85.3
Ribosomal protein L11 methyltransferase (EC 2.1.1.-)	fig|6666666.157468.peg.1257	100	100	100	98.02	98.02	98.02	100	100	100	100	99.67	99.67	100	100	98.68	98.68	100	100	98.68	99.67	0	88.31
Lipoprotein releasing system transmembrane protein LolE	fig|6666666.157468.peg.1261	100	100	100	99	99	99	99.75	99.75	99.75	99.75	99.75	99.75	99.75	99.75	98	98.25	99.75	99.75	98.25	98.75	98.25	87.35
Protein export cytoplasm protein SecA ATPase RNA helicase (TC 3.A.5.1.1)	fig|6666666.157468.peg.1262	100	100	100	99.77	99.77	99.77	99.77	99.77	99.77	99.77	99.77	99.77	99.77	99.77	98.84	98.84	99.77	99.65	98.84	99.54	98.38	83.98
Outer membrane lipoprotein carrier protein LolA	fig|6666666.157468.peg.1263	100	100	100	100	100	100	98.82	98.82	98.82	98.82	98.82	98.82	98.82	98.82	98.22	98.22	98.82	98.82	98.22	98.78	97.04	82.35
N-carbamoylputrescine amidase (3.5.1.53) / Omega amidase (Nit2 homolog)	fig|6666666.157468.peg.1267	100	100	100	100	100	100	99.31	99.31	99.31	99.31	99.31	99.31	99.31	99.31	99.31	97.59	99.31	99.31	97.93	99.66	96.9	89.54
Cobalt-zinc-cadmium resistance protein	fig|6666666.157468.peg.1268	100	100	100	100	100	100	100	100	100	100	100	100	100	100	100	100	100	99.66	100	100	97.29	87.86
Agmatine deiminase (EC 3.5.3.12)	fig|6666666.157468.peg.1269	100	100	100	98.77	98.77	98.77	98.46	98.46	98.46	98.46	98.46	98.46	98.46	98.46	98.46	97.85	98.46	98.77	98.46	98.77	99.08	78.23
IMP cyclohydrolase (EC 3.5.4.10) / Phosphoribosylaminoimidazolecarboxamide formyltransferase (EC 2.1.2.3)	fig|6666666.157468.peg.1275	100	100	100	99.41	99.41	99.41	99.61	99.61	99.61	99.61	99.61	99.61	99.61	99.61	99.61	99.61	99.61	99.61	99.61	98.24	97.25	85.19
DnaJ-like protein DjlA	fig|6666666.157468.peg.1276	100	100	100	97.27	97.27	97.27	98.44	98.44	98.44	98.05	98.44	98.44	98.44	98.58	98.44	98.44	98.44	98.44	98.44	99.06	96.88	95.71
Phosphoribosylformylglycinamidine synthase, synthetase subunit (EC 6.3.5.3)	fig|6666666.157468.peg.1277	100	100	100	98.21	98.21	98.21	97.94	97.94	97.94	97.94	98.08	98.08	97.94	97.94	98.08	98.08	97.94	98.08	97.8	99.31	97.25	96.96
GTPase and tRNA-U34 5-formylation enzyme TrmE	fig|6666666.157468.peg.1278	100	100	100	99.55	99.55	99.55	98.87	98.87	98.87	98.87	98.87	98.87	98.87	98.87	99.1	99.32	98.87	98.87	98.64	99.1	97.06	90.31
RNA-binding protein Jag	fig|6666666.157468.peg.1279	100	100	100	98.9	98.9	98.9	99.26	99.26	99.26	99.26	99.26	99.26	99.26	99.26	99.26	98.9	99.26	99.26	98.9	100	97.43	0
Inner membrane protein translocase component YidC, long form	fig|6666666.157468.peg.1280	100	100	100	99.05	99.05	99.05	99.43	99.43	99.43	99.43	99.43	99.43	99.24	99.43	98.86	98.86	99.43	99.43	98.86	98.67	96.96	0
Protein YidD	fig|6666666.157468.peg.1281	100	100	100	100	100	100	100	100	100	100	100	100	100	100	0	99.12	100	100	99.14	98.23	95.58	97.6
Ribonuclease P protein component (EC 3.1.26.5)	fig|6666666.157468.peg.1282	100	100	100	99.07	99.07	99.07	100	100	100	100	100	100	100	100	99.07	100	100	100	99.07	98.15	100	0
LSU ribosomal protein L34p	fig|6666666.157468.peg.1283	100	100	100	100	100	100	100	100	100	100	100	100	100	100	100	100	100	100	100	100	100	92.38
Protein export cytoplasm protein SecA ATPase RNA helicase (TC 3.A.5.1.1)	fig|6666666.157468.peg.1284	100	100	100	100	100	100	99.37	99.37	99.37	99.37	99.37	99.37	99.37	99.37	99.37	99.37	99.37	99.37	99.37	100	98.74	81.42
4-hydroxybenzoyl-CoA thioesterase family active site	fig|6666666.157468.peg.1287	100	100	100	96.77	96.77	96.77	97.58	97.58	97.58	97.58	97.58	97.58	97.58	97.58	96.77	96.77	97.58	97.58	96.77	100	95.97	84.18
Filamentous haemagglutinin domain protein	fig|6666666.157468.peg.1292	100	100	100	0	0	0	82.98	82.98	82.98	61.7	82.98	82.98	82.98	82.98	57.45	95.74	82.98	82.98	57.45	100	0	98.65
tRNA (5-methoxyuridine) 34 synthase	fig|6666666.157468.peg.1297	100	100	100	98.97	98.97	98.97	99.31	99.31	99.31	99.31	99.31	99.31	99.31	99.31	98.28	98.28	99.31	99.31	97.94	100	98.28	95.32
Hot dog fold protein HP0420	fig|6666666.157468.peg.1298	100	100	100	100	100	100	100	100	100	100	100	100	100	100	98.96	98.96	100	100	98.44	100	97.4	77.38
Thermonuclease family protein	fig|6666666.157468.peg.1300	100	100	100	99.43	99.43	99.43	100	100	100	100	100	100	100	100	99.43	99.43	100	100	99.43	98.86	98.29	0
Aminoacyl-histidine dipeptidase (Peptidase D) (EC 3.4.13.3)	fig|6666666.157468.peg.1301	100	100	100	99.29	99.29	99.29	98.1	98.1	98.1	98.1	99.53	99.53	98.1	98.1	97.87	98.34	98.1	98.1	97.87	98.82	97.87	80.99
Transmembrane transport protein	fig|6666666.157468.peg.1302	100	100	100	98.8	98.8	98.8	98.55	98.55	98.55	98.22	99.76	99.76	98.55	98.55	98.07	99.52	98.55	98.55	98.07	99.28	97.21	82.89
Surface-exposed lipoprotein JlpA	fig|6666666.157468.peg.1304	100	100	100	97.85	97.85	97.85	97.85	97.85	97.85	97.85	97.85	97.85	97.85	97.58	98.12	98.66	97.85	98.12	98.39	99.19	96.51	65.7
UPF0246 protein YaaA	fig|6666666.157468.peg.1305	100	100	100	95.53	95.53	95.53	95.93	95.93	95.93	95.93	95.53	95.53	95.93	95.93	95.12	97.56	95.93	95.93	95.12	99.19	93.09	73.08
Hippurate hydrolase (EC 3.5.1.32)	fig|6666666.157468.peg.1306	100	100	100	99.22	99.22	99.22	98.69	98.69	98.69	97.4	98.69	98.69	98.69	98.69	98.17	99.74	98.69	98.69	98.43	99.22	97.13	94.49
FIG00761799: membrane protein	fig|6666666.157468.peg.1308	100	100	100	97.73	97.73	97.73	98.48	98.48	98.48	98.48	98.48	98.48	98.48	98.48	97.79	98.48	98.48	98.48	96.32	96.92	93.33	80.42
Coproporphyrinogen III oxidase, oxygen-independent (EC 1.3.99.22)	fig|6666666.157468.peg.1312	100	100	100	98.89	98.89	98.89	98.67	98.67	98.67	98.67	98.67	98.67	98.67	98.67	98.45	98	98.67	98.67	98.45	98.89	97.56	83.33
Ornithine carbamoyltransferase (EC 2.1.3.3)	fig|6666666.157468.peg.1314	100	100	100	97.39	97.39	97.39	97.06	97.06	97.06	97.06	98.04	98.04	97.06	97.06	99.02	99.02	97.06	98.72	98.69	98.69	95.75	80
Porphobilinogen synthase (EC 4.2.1.24)	fig|6666666.157468.peg.1315	100	100	100	98.17	98.17	98.17	97.86	97.86	97.86	97.86	98.17	98.17	97.86	97.86	99.69	98.47	97.86	97.86	99.39	98.78	97.12	92.16
GTP cyclohydrolase II (EC 3.5.4.25)	fig|6666666.157468.peg.1316	100	100	100	100	100	100	98.92	98.92	98.92	98.92	99.46	99.46	98.92	98.92	100	99.46	98.92	98.92	100	98.39	96.77	85.25
rRNA small subunit 7-methylguanosine (m7G) methyltransferase GidB	fig|6666666.157468.peg.1317	100	100	100	98.94	98.94	98.94	98.94	98.94	98.94	98.94	98.94	98.94	98.94	98.94	99.47	97.34	98.94	98.94	99.47	96.81	95.74	97.41
RNA polymerase sigma factor RpoD	fig|6666666.157468.peg.1321	100	100	100	99.84	99.84	99.84	100	100	100	100	100	100	100	100	99.84	99.84	100	100	99.84	99.84	98.39	83.61
FIG00732228: membrane protein	fig|6666666.157468.peg.1323	100	100	100	99.42	99.42	99.42	100	100	100	99.41	100	100	100	100	97.67	97.67	100	100	97.67	100	96.51	88.39
Cell division protein FtsH (EC 3.4.24.-)	fig|6666666.157468.peg.1325	100	100	100	99.63	99.63	99.63	99.07	99.07	99.07	99.07	99.44	99.44	99.63	99.63	98.33	98.51	99.63	99.63	98.33	98.88	97.03	78.71
tRNA-t(6)A37 methylthiotransferase	fig|6666666.157468.peg.1326	100	100	100	99.28	99.28	99.28	99.04	99.04	99.04	99.04	100	100	100	100	99.04	98.56	100	100	99.04	100	98.08	91.75
MscS family mechanosensitive ion channel	fig|6666666.157468.peg.1327	100	100	100	99.43	99.43	99.43	99.81	99.81	99.81	99.81	99.81	99.81	99.81	99.81	99.81	99.62	99.81	99.81	99.81	99.43	98.66	89.58
3-dehydroquinate synthase (EC 4.2.3.4)	fig|6666666.157468.peg.1328	100	100	100	98.01	98.01	98.01	98.58	98.58	98.58	98.58	98.29	98.29	98.29	98.29	98.58	97.72	98.29	98.29	98.58	98.29	96.87	88.52
TrkA domain protein	fig|6666666.157468.peg.1329	100	100	100	100	100	100	100	100	100	100	99.57	99.57	99.57	99.57	100	99.36	99.57	99.36	100	99.14	98.93	96.83
tRNA-guanine transglycosylase (EC 2.4.2.29)	fig|6666666.157468.peg.1330	100	100	100	99.2	99.2	99.2	98.66	98.66	98.66	98.4	99.73	99.73	99.73	99.73	98.39	99.2	99.73	99.73	98.12	99.2	97.59	96.12
Magnesium and cobalt transport protein CorA	fig|6666666.157468.peg.1331	100	100	100	99.61	99.61	99.61	98.43	98.43	98.43	98.43	98.04	98.04	98.04	98.04	98.43	98.82	98.04	98.04	98.43	98.82	96.86	39.53
Glycerol-3-phosphate ABC transporter, periplasmic glycerol-3-phosphate-binding protein (TC 3.A.1.1.3)	fig|6666666.157468.peg.1332	100	0	0	0	0	0	0	0	0	0	0	0	0	0	0	0	0	0	0	0	0	84.09
Homolog of BLC protein	fig|6666666.157468.peg.1333	100	0	0	89.39	89.39	89.39	89.39	89.39	89.39	89.39	89.39	89.39	89.39	89.39	89.39	90.91	89.39	89.39	92.42	0	89.39	70.87
Cinnamyl alcohol dehydrogenase/reductase (EC 1.1.1.195) @ Alcohol dehydrogenase (EC 1.1.1.1)	fig|6666666.157468.peg.1334	100	88.89	88.89	97.78	97.78	97.78	97.78	97.78	97.78	97.78	97.78	97.78	97.78	97.78	97.78	100	97.78	97.78	97.78	100	100	95.07
L-asparaginase (EC 3.5.1.1)	fig|6666666.157468.peg.1335	100	100	100	99.7	99.7	99.7	99.4	99.4	99.4	99.4	99.7	99.7	99.7	98.49	89.73	98.79	99.4	99.4	89.43	99.7	87.92	89.75
Single-stranded-DNA-specific exonuclease RecJ (EC 3.1.-.-)	fig|6666666.157468.peg.1336	100	100	100	99.81	99.81	99.81	99.81	99.81	99.81	99.81	99.81	99.81	99.81	99.62	99.62	99.81	99.81	99.62	98.66	99.62	99.04	0
CTP synthase (EC 6.3.4.2)	fig|6666666.157468.peg.1337	100	100	100	99.63	99.63	99.63	99.63	99.63	99.63	99.63	99.63	99.63	99.45	99.45	99.63	99.63	99.63	99.45	98.71	99.63	98.53	89.5
Thymidylate synthase thyX (EC 2.1.1.-)	fig|6666666.157468.peg.1338	100	100	100	100	100	100	100	100	100	100	100	100	100	100	100	100	100	100	100	100	99.52	72.48
Ribonucleotide reductase of class Ia (aerobic), alpha subunit (EC 1.17.4.1)	fig|6666666.157468.peg.1340	100	100	100	100	100	100	99.75	99.75	99.75	98.73	99.87	99.87	99.62	99.49	99.62	99.49	99.75	99.49	99.62	99.75	99.62	77.7
Adenylosuccinate lyase (EC 4.3.2.2)	fig|6666666.157468.peg.1341	100	100	100	99.77	99.77	99.77	100	100	100	100	99.1	99.1	100	99.1	99.1	97.96	99.77	97.74	99.55	99.55	99.1	50.4
Pseudouridine synthase (EC 5.4.99.-)	fig|6666666.157468.peg.1342	100	100	100	96.44	96.44	96.44	100	100	100	100	97.51	97.51	100	96.8	96.8	78.99	96.44	78.99	100	100	95.73	0
Fumarylacetoacetate hydrolase family protein	fig|6666666.157468.peg.1343	100	100	100	97.95	97.95	97.95	98.63	98.63	98.63	98.63	99.32	99.32	98.63	99.32	97.95	85.62	97.95	85.62	99.66	99.66	96.88	81.08
Cytochrome c551 peroxidase (EC 1.11.1.5)	fig|6666666.157468.peg.1344	100	100	100	98.85	98.85	98.85	98.47	98.47	98.47	98.47	98.08	98.08	98.47	99.23	100	98.08	98.47	98.08	98.85	98.47	89.8	71.13
MCP-domain signal transduction protein	fig|6666666.157468.peg.1345	100	100	98.14	99.66	99.65	99.66	99.07	97.86	97.86	97.86	98.14	98.14	98.14	100	99.83	99.76	98.14	98.82	99.49	98.65	96.23	0
small hydrophobic protein	fig|6666666.157468.peg.1346	100	100	100	100	100	100	100	100	100	100	100	100	100	100	100	0	100	100	100	100	100	82.3
Queuosine Biosynthesis QueC ATPase	fig|6666666.157468.peg.1348	100	100	100	100	100	100	99.55	99.55	99.55	99.55	100	100	100	100	99.11	100	99.55	100	100	100	99.11	98.63
HMP-PP hydrolase (pyridoxal phosphatase) Cof, detected in genetic screen for thiamin metabolic genes (PMID:15292217)	fig|6666666.157468.peg.1349	100	100	100	99.75	99.75	99.75	99.51	99.51	99.51	99.51	99.26	99.26	99.75	99.75	99.75	99.51	99.75	99.75	99.75	99.51	99.26	99.5
FIG00761799: membrane protein	fig|6666666.157468.peg.1350	100	100	100	100	100	100	97.62	97.62	97.62	97.62	100	100	97.62	100	100	100	100	100	100	0	0	97.28
FIG00761799: membrane protein	fig|6666666.157468.peg.1351	100	100	100	100	100	100	97.96	97.96	97.96	97.96	100	100	97.96	99.05	97.96	97.96	100	99.05	100	0	93.88	84.21
Dihydroxy-acid dehydratase (EC 4.2.1.9)	fig|6666666.157468.peg.1352	100	100	100	98.57	98.57	98.57	98.39	98.39	98.39	98.39	98.92	98.92	98.39	98.75	98.03	99.46	98.75	98.75	98.92	99.82	97.67	88.55
Rubrerythrin	fig|6666666.157468.peg.1353	100	100	100	99.07	99.07	99.07	99.53	99.53	99.53	99.53	99.53	99.53	99.53	99.53	99.53	100	99.53	99.53	99.53	100	100	93.53
Periplasmic dsDNA and ssDNA-binding protein contributing to transformation	fig|6666666.157468.peg.1354	100	100	100	100	100	100	98.73	98.73	98.73	98.73	100	100	98.73	100	98.73	98.73	100	100	100	100	98.73	88.54
Ribonuclease HII (EC 3.1.26.4)	fig|6666666.157468.peg.1355	100	100	100	98.92	98.92	98.92	97.38	97.38	97.38	97.38	99.48	99.48	97.38	99.48	99.48	99.48	100	99.48	100	99.48	96.34	89.92
Glutamate synthase [NADPH] small chain (EC 1.4.1.13)	fig|6666666.157468.peg.1356	100	100	100	98.13	98.13	98.13	98.34	98.34	98.34	98.34	98.34	98.34	98.34	98.34	97.3	98.54	98.54	98.34	98.13	98.54	96.88	82.32
Glutamate synthase [NADPH] large chain (EC 1.4.1.13)	fig|6666666.157468.peg.1357	100	100	100	99.73	99.73	99.73	99.73	99.73	99.73	99.73	99.46	99.46	99.8	99.73	99.8	99.6	99.67	99.73	99.4	99.73	99.4	86.67
Histidine permease YuiF	fig|6666666.157468.peg.1358	100	100	100	99.31	99.31	99.31	99.77	99.77	99.77	99.77	99.54	99.54	99.54	99.31	99.08	99.31	99.54	99.54	99.08	100	97.92	67.23
DNA gyrase subunit B (EC 5.99.1.3)	fig|6666666.157468.peg.1361	100	100	100	99.61	99.61	99.61	100	100	100	100	99.74	99.74	99.61	99.74	99.61	99.61	99.74	99.61	99.48	99.48	99.22	83.64
DNA polymerase III beta subunit (EC 2.7.7.7)	fig|6666666.157468.peg.1362	100	100	100	99.44	99.44	99.44	99.15	99.15	99.15	99.15	99.44	99.44	99.44	98.87	98.59	99.44	98.87	98.87	99.44	99.44	97.75	91.32
Chromosomal replication initiator protein DnaA	fig|6666666.157468.peg.1363	100	100	100	99.09	99.09	99.09	99.32	99.32	99.32	99.32	100	100	99.32	99.55	99.32	99.09	99.55	99.32	98.86	99.32	98.18	0
Crossover junction endodeoxyribonuclease RuvC (EC 3.1.22.4)	fig|6666666.157468.peg.1364	100	100	100	98.91	98.91	98.73	99.46	99.46	99.46	99.46	100	100	99.46	100	98.37	99.46	99.46	99.46	99.46	99.38	96.88	80.05
Flagellar hook subunit protein	fig|6666666.157468.peg.1366	100	100	100	80.23	80.23	80.23	80.7	80.58	80.7	80.93	89.94	89.94	84.33	84.46	82.72	81.97	84.46	80.81	96.69	95.62	75.91	87.26
NADPH dependent preQ0 reductase (EC 1.7.1.13)	fig|6666666.157468.peg.1367	100	100	100	100	100	100	100	100	100	100	100	100	100	100	100	99.21	100	100	100	99.21	99.21	79.3
2-isopropylmalate synthase (EC 2.3.3.13)	fig|6666666.157468.peg.1370	100	100	100	98.83	98.83	98.83	98.43	98.43	98.43	98.43	97.85	97.85	98.63	98.83	98.83	99.02	98.83	98.83	98.43	99.41	98.24	82.07
3-isopropylmalate dehydrogenase (EC 1.1.1.85)	fig|6666666.157468.peg.1371	100	100	100	98.88	98.88	98.88	98.88	98.88	98.88	98.88	99.16	99.16	98.88	98.88	98.32	98.32	98.88	99.16	99.16	99.16	98.04	90.06
3-isopropylmalate dehydratase large subunit (EC 4.2.1.33)	fig|6666666.157468.peg.1372	100	100	100	99.15	99.15	99.15	98.72	98.72	98.72	98.72	98.93	98.93	98.72	98.93	99.57	99.57	98.72	98.93	99.15	99.15	99.15	52.38
3-isopropylmalate dehydratase small subunit (EC 4.2.1.33)	fig|6666666.157468.peg.1373	100	100	100	100	100	100	100	100	100	100	98	98	100	100	99.5	99	100	100	100	99	99	89.61
lipopolysaccharide core biosynthesis protein LpsA	fig|6666666.157468.peg.1375	100	100	100	0	0	0	0	0	99.19	0	0	0	0	0	98.52	0	0	0	0	99.36	0	84.32
Ribosomal RNA large subunit methyltransferase N (EC 2.1.1.-)	fig|6666666.157468.peg.1376	100	100	100	98.6	98.6	98.6	98.31	98.31	98.31	98.31	98.6	98.6	98.6	98.31	97.19	97.75	98.6	98.6	98.6	99.16	97.47	97.8
Purine nucleoside phosphorylase	fig|6666666.157468.peg.1377	100	100	100	98.88	98.88	98.88	98.31	98.31	98.31	98.31	98.31	98.31	98.31	98.31	98.31	98.31	98.31	98.31	98.31	98.88	96.07	85.54
SSU rRNA (adenine(1518)-N(6)/adenine(1519)-N(6))-dimethyltransferase (EC 2.1.1.182)	fig|6666666.157468.peg.1378	100	100	100	99.62	99.62	99.62	99.25	99.25	99.25	99.25	99.62	99.62	99.62	99.62	97.74	99.25	99.62	99.62	99.25	100	97.74	0
Zn-dependent hydrolase, RNA-metabolising	fig|6666666.157468.peg.1379	100	100	100	99.55	99.55	99.55	99.85	99.85	99.85	99.85	99.85	99.85	99.85	99.85	100	99.24	99.85	99.85	99.24	99.55	99.24	64.1
Ribosomal large subunit pseudouridine synthase B (EC 4.2.1.70)	fig|6666666.157468.peg.1380	100	100	100	99.6	99.6	99.6	99.6	99.6	99.6	99.6	99.6	99.6	99.6	99.6	99.21	99.6	99.6	99.6	99.6	99.21	98.02	92.96
SSU ribosomal protein S10p (S20e)	fig|6666666.157468.peg.1381	100	100	100	100	100	100	100	100	100	100	100	100	100	100	100	100	100	0	100	100	99.03	84.64
LSU ribosomal protein L3p (L3e)	fig|6666666.157468.peg.1382	100	100	100	100	100	100	99.48	99.48	99.48	99.48	99.48	99.48	99.48	99.48	100	100	100	0	100	100	100	82.93
LSU ribosomal protein L4p (L1e)	fig|6666666.157468.peg.1383	100	100	100	99.02	99.02	99.02	98.53	98.53	98.53	98.53	98.53	98.53	98.53	98.53	100	97.96	0	98.53	98.9	99.02	98.04	37.66
LSU ribosomal protein L23p (L23Ae)	fig|6666666.157468.peg.1384	100	100	100	96.77	96.77	96.77	97.85	97.85	97.85	97.85	97.85	97.85	97.85	97.85	100	100	97.85	97.85	100	97.85	98.92	91.06
LSU ribosomal protein L2p (L8e)	fig|6666666.157468.peg.1385	100	100	100	99.64	99.64	99.64	99.64	99.64	99.64	99.64	99.64	99.64	99.64	99.64	99.28	99.28	99.64	99.64	99.64	99.64	98.91	72.65
SSU ribosomal protein S19p (S15e)	fig|6666666.157468.peg.1386	100	100	100	100	100	100	100	100	100	100	100	100	100	100	100	100	100	100	100	100	100	90.67
LSU ribosomal protein L22p (L17e)	fig|6666666.157468.peg.1387	100	100	100	92.52	92.52	92.52	98.2	98.2	98.2	98.2	98.2	98.2	98.2	98.2	100	100	98.2	98.2	100	98.2	97.3	80.74
SSU ribosomal protein S3p (S3e)	fig|6666666.157468.peg.1388	100	100	100	100	100	100	100	100	100	100	100	100	100	100	100	100	100	100	100	100	99.14	91.85
LSU ribosomal protein L16p (L10e)	fig|6666666.157468.peg.1389	100	100	100	100	100	100	100	100	100	100	100	100	100	100	100	100	100	100	100	100	100	77.06
LSU ribosomal protein L29p (L35e)	fig|6666666.157468.peg.1390	100	100	100	100	100	100	100	100	100	100	100	100	100	100	100	100	100	100	100	100	100	81.14
SSU ribosomal protein S17p (S11e)	fig|6666666.157468.peg.1391	100	100	100	100	100	100	100	100	100	100	100	100	100	100	100	100	100	100	100	100	97.59	0
LSU ribosomal protein L14p (L23e)	fig|6666666.157468.peg.1392	100	100	100	100	100	100	100	100	100	100	100	100	100	100	100	100	100	100	100	100	100	43.41
LSU ribosomal protein L24p (L26e)	fig|6666666.157468.peg.1393	100	100	100	100	100	100	100	100	100	100	100	100	100	100	100	100	100	100	100	100	97.4	83.27
LSU ribosomal protein L5p (L11e)	fig|6666666.157468.peg.1394	100	100	100	100	100	100	100	100	100	100	100	100	100	100	100	100	100	100	100	100	99.45	89.14
SSU ribosomal protein S14p (S29e) @ SSU ribosomal protein S14p (S29e), zinc-dependent	fig|6666666.157468.peg.1395	100	100	100	100	100	100	100	100	100	100	100	100	100	100	100	100	100	100	100	100	100	88.01
SSU ribosomal protein S8p (S15Ae)	fig|6666666.157468.peg.1396	100	100	100	99.24	99.24	99.24	100	100	100	100	100	100	100	100	100	100	100	100	100	99.24	98.47	93.8
LSU ribosomal protein L6p (L9e)	fig|6666666.157468.peg.1397	100	100	100	100	100	100	100	100	100	100	100	100	100	100	100	99.44	100	100	99.44	100	99.44	86.52
LSU ribosomal protein L18p (L5e)	fig|6666666.157468.peg.1398	100	100	100	100	100	100	99.15	99.15	99.15	99.15	99.15	99.15	99.15	99.15	100	99.15	99.15	99.15	99.15	100	99.15	90.6
SSU ribosomal protein S5p (S2e)	fig|6666666.157468.peg.1399	100	100	100	100	100	100	100	100	100	100	100	100	99.32	100	100	100	100	100	100	100	100	82.78
LSU ribosomal protein L15p (L27Ae)	fig|6666666.157468.peg.1400	100	100	100	98.46	98.46	98.46	98.46	98.46	98.46	98.46	98.46	98.46	98.46	98.46	98.46	97.69	98.46	98.46	97.69	98.46	98.46	77.05
Preprotein translocase secY subunit (TC 3.A.5.1.1)	fig|6666666.157468.peg.1401	100	99.76	100	100	99.76	100	100	100	100	100	100	100	100	99.76	99.28	99.26	100	99.76	99.26	99.76	99.04	83.23
DNA topoisomerase I (EC 5.99.1.2)	fig|6666666.157468.peg.1403	100	100	100	98.71	98.71	98.71	98.86	98.86	98.86	98.86	98.86	98.86	98.86	98.86	99.14	99	98.86	98.86	96.43	99	97.29	0
Biotin synthase (EC 2.8.1.6)	fig|6666666.157468.peg.1404	100	100	100	99.64	99.64	99.64	99.28	99.28	99.28	99.28	99.28	99.28	99.28	99.28	100	97.84	99.28	99.28	99.64	98.56	98.2	95.85
Citrate synthase (si) (EC 2.3.3.1)	fig|6666666.157468.peg.1406	100	100	100	100	100	100	99.53	99.53	99.53	99.53	99.53	99.53	100	100	99.76	100	99.53	100	100	100	99.53	88.76
3'(2'),5'-bisphosphate nucleotidase (EC 3.1.3.7)	fig|6666666.157468.peg.1407	100	100	100	98.43	98.43	98.43	99.21	99.21	99.21	99.21	99.21	99.21	99.21	98.03	98.03	98.03	99.21	99.21	98.03	99.21	96.06	96.45
UDP-N-acetylenolpyruvoylglucosamine reductase (EC 1.1.1.158)	fig|6666666.157468.peg.1409	100	100	100	96.51	96.51	96.51	96.9	96.9	96.9	96.9	96.9	96.9	96.9	96.9	97.29	96.9	96.9	95.35	97.29	97.29	93.41	82.02
Flagellar biosynthesis protein FliQ	fig|6666666.157468.peg.1410	100	100	100	100	100	100	100	100	100	100	100	100	100	100	100	100	100	100	100	100	96.63	94.62
Menaquinone via futalosine step 4	fig|6666666.157468.peg.1411	100	100	100	99.65	99.65	99.65	99.3	99.3	99.3	99.3	99.65	99.65	99.65	99.65	98.6	98.6	99.65	98.25	98.6	97.9	95.1	92.93
RecA protein	fig|6666666.157468.peg.1412	100	100	100	100	100	100	100	100	100	100	100	100	100	100	100	100	100	100	100	100	98.54	97.67
Enolase (EC 4.2.1.11)	fig|6666666.157468.peg.1413	100	100	100	100	100	100	99.76	99.76	99.76	99.76	100	100	100	100	99.52	99.28	100	100	99.52	99.28	97.58	93.88
DNA ligase (ATP) (EC 6.5.1.1)	fig|6666666.157468.peg.1416	100	100	100	100	100	100	100	100	100	100	98.58	98.58	100	100	97.52	98.23	100	100	97.87	99.29	98.23	60.15
CopG protein	fig|6666666.157468.peg.1418	100	100	100	99.31	99.31	99.31	99.31	99.31	99.31	99.31	97.93	97.93	99.31	99.31	97.93	97.93	99.31	99.31	96.55	97.24	95.86	88.84
Fe2+ ABC transporter, ATP-binding subunit	fig|6666666.157468.peg.1421	100	100	100	100	100	100	100	100	100	100	100	100	100	100	100	99.54	100	100	100	99.54	99.54	77.69
Fe2+ ABC transporter, permease protein 2	fig|6666666.157468.peg.1422	100	100	100	98.92	98.92	98.92	100	100	100	100	99.73	99.73	100	100	98.39	98.66	100	100	98.66	98.66	98.12	87.23
Cell division protein FtsX	fig|6666666.157468.peg.1423	100	100	100	99.3	99.3	99.3	99.07	99.07	99.07	99.07	99.07	99.07	99.07	98.83	99.53	99.77	99.07	99.07	99.53	98.83	99.53	0
Fe2+ ABC transporter, substrate binding protein	fig|6666666.157468.peg.1424	100	100	100	98.72	98.72	98.72	99.14	99.14	99.14	99.14	99.36	99.36	99.14	99.14	98.29	98.5	99.14	99.36	98.5	98.72	96.36	79.1
Periplasmic protein p19 involved in high-affinity Fe2+ transport	fig|6666666.157468.peg.1425	100	100	100	100	100	100	100	100	100	100	100	100	100	100	100	100	100	100	100	100	100	39.01
Na+/H+ antiporter NhaA type	fig|6666666.157468.peg.1429	100	100	100	99.48	99.48	99.48	100	100	100	99.2	99.48	99.48	99.48	99.48	99.74	99.74	99.48	99.21	99.74	99.21	98.69	35.85
Na+/H+ antiporter NhaA type	fig|6666666.157468.peg.1430	100	100	100	100	100	100	97.69	97.69	97.69	97.69	99.49	99.49	99.49	99.49	97.17	97.43	99.49	99.49	97.43	99.74	97.69	82.43
Glutamate racemase (EC 5.1.1.3)	fig|6666666.157468.peg.1432	100	100	100	98.79	98.79	98.79	98.38	98.38	98.38	98.38	98.79	98.79	98.79	98.79	98.79	99.19	98.79	98.79	99.6	99.6	97.57	91.79
Methionine aminopeptidase (EC 3.4.11.18)	fig|6666666.157468.peg.1433	100	100	100	99.21	99.21	99.21	99.6	99.6	99.6	99.6	99.21	99.21	99.21	99.21	100	99.6	99.21	98.81	99.6	99.6	98.41	76.19
Uncharacterized ABC transporter, ATP-binding protein YrbF	fig|6666666.157468.peg.1437	100	100	100	98.75	98.75	98.75	99.17	99.17	99.17	99.17	98.75	98.75	98.75	98.75	97.92	97.92	98.75	98.75	100	98.75	99.17	80.61
Transketolase (EC 2.2.1.1)	fig|6666666.157468.peg.1439	100	100	100	99.05	99.05	99.05	98.42	98.42	98.42	98.42	99.05	99.05	99.05	99.05	97.94	98.1	99.05	98.89	98.73	99.21	97.31	72.92
Octaprenyl diphosphate synthase (EC 2.5.1.90) / Dimethylallyltransferase (EC 2.5.1.1) / (2E,6E)-farnesyl diphosphate synthase (EC 2.5.1.10) / Geranylgeranyl diphosphate synthase (EC 2.5.1.29)	fig|6666666.157468.peg.1440	100	100	100	99.64	99.64	99.64	98.93	98.93	98.93	98.93	99.64	99.64	99.64	99.64	98.93	99.29	99.64	99.64	99.64	99.29	99.29	98.4
UDP-N-acetylmuramoylalanyl-D-glutamate--2,6-diaminopimelate ligase (EC 6.3.2.13)	fig|6666666.157468.peg.1443	100	100	100	99.26	99.26	99.53	99.77	99.77	99.77	99.77	99.53	99.53	99.26	99.53	98.13	98.59	99.26	99.26	98.36	100	97.89	78.01
Iron-sulfur cluster assembly scaffold protein NifU	fig|6666666.157468.peg.1445	100	100	100	100	100	100	100	100	100	100	100	100	100	100	100	100	100	100	100	100	100	83.82
DNA primase (EC 2.7.7.-)	fig|6666666.157468.peg.1446	100	100	100	99.5	99.5	99.5	99.01	99.01	99.01	99.01	99.5	99.5	99.34	99.5	98.68	98.51	99.34	99.5	99.17	98.84	97.52	92.52
Ribonuclease HI (EC 3.1.26.4)	fig|6666666.157468.peg.1448	100	100	100	100	100	100	100	100	100	100	100	100	100	100	100	99.32	100	100	100	100	97.95	82.54
Ribonuclease III (EC 3.1.26.3)	fig|6666666.157468.peg.1449	100	100	100	99.55	99.55	99.55	99.55	99.55	99.55	99.55	99.55	99.55	99.55	99.55	99.55	99.11	99.55	99.55	99.55	98.66	98.66	87.34
Chorismate synthase (EC 4.2.3.5)	fig|6666666.157468.peg.1450	100	100	100	98.34	98.34	98.34	99.17	99.17	99.17	99.17	98.34	98.34	98.34	98.34	99.17	99.17	98.34	98.34	99.17	98.34	98.34	99.01
tRNA (5-methylaminomethyl-2-thiouridylate)-methyltransferase (EC 2.1.1.61)	fig|6666666.157468.peg.1451	100	100	100	98.17	98.17	98.17	99.69	99.69	99.69	99.69	99.08	99.08	99.08	99.08	99.69	99.69	99.08	99.08	99.69	99.69	96.33	74.14
Ferric siderophore transport system, periplasmic binding protein TonB	fig|6666666.157468.peg.1454	100	100	100	98.57	98.57	98.57	98.57	98.57	98.57	98.57	98.57	98.57	98.57	98.57	98.57	98.57	98.57	98.57	98.57	52.38	73.47	96.92
Ferric siderophore transport system, periplasmic binding protein TonB	fig|6666666.157468.peg.1455	100	100	100	97.53	97.53	97.53	100	100	100	100	100	100	100	100	100	100	100	100	100	43.68	91.18	85.56
Biopolymer transport protein ExbD/TolR	fig|6666666.157468.peg.1456	100	100	100	100	100	100	98.45	98.45	98.45	98.45	100	100	100	100	97.67	98.45	100	100	97.67	100	99.22	81.94
Ferric siderophore transport system, biopolymer transport protein ExbB	fig|6666666.157468.peg.1457	100	100	100	99.29	99.29	99.29	100	100	100	100	100	100	100	100	99.29	99.19	100	100	99.19	99.29	98.58	100
Serine transporter	fig|6666666.157468.peg.1460	100	100	100	98.8	98.8	98.8	99.28	99.28	99.28	99.28	99.76	99.76	99.76	99.76	98.56	98.56	99.76	99.76	98.56	99.04	41.53	82.05
L-serine dehydratase, beta subunit (EC 4.3.1.17) / L-serine dehydratase, alpha subunit (EC 4.3.1.17)	fig|6666666.157468.peg.1461	100	100	100	99.56	99.56	99.56	98.9	98.9	98.9	98.9	99.12	99.12	98.9	99.12	99.56	99.56	99.12	99.12	99.56	99.34	95.59	91.45
membrane protein	fig|6666666.157468.peg.1462	100	100	100	98.82	98.82	98.82	100	100	100	100	95.88	95.88	96.47	96.47	99.41	99.41	96.47	96.47	98.82	99.41	94.71	87.85
Diaminohydroxyphosphoribosylaminopyrimidine deaminase (EC 3.5.4.26) / 5-amino-6-(5-phosphoribosylamino)uracil reductase (EC 1.1.1.193)	fig|6666666.157468.peg.1463	100	100	100	98.16	98.16	98.16	99.08	99.08	99.08	99.08	99.69	99.69	99.69	0	98.16	98.47	99.69	99.69	98.16	98.47	95.09	66.67
A/G-specific adenine glycosylase (EC 3.2.2.-)	fig|6666666.157468.peg.1465	100	100	100	97.64	97.64	97.64	99.41	99.41	99.41	99.41	99.12	99.12	99.12	99.12	98.23	96.76	99.12	99.12	97.94	98.23	96.76	90.91
dicarboxylic acid transporter PcaT	fig|6666666.157468.peg.1466	100	100	100	99.52	99.52	99.52	100	100	100	100	99.52	99.52	100	99.76	99.76	99.16	100	99.76	99.52	99.76	99.05	95.24
Haemin uptake system periplasmic haemin-binding protein	fig|6666666.157468.peg.1468	100	100	100	98.88	98.88	98.88	98.13	98.13	98.13	98.13	98.51	98.51	98.13	98.51	98.88	98.51	98.13	98.51	98.88	98.13	97.76	88.54
Haemin uptake system ATP-binding protein	fig|6666666.157468.peg.1469	100	100	100	98.84	98.84	98.84	98.45	98.45	98.45	98.45	98.06	98.06	98.45	98.06	99.22	99.22	98.45	98.06	99.22	98.06	98.45	74.03
Haemin uptake system permease protein	fig|6666666.157468.peg.1470	100	100	100	98.78	98.78	98.78	99.09	99.09	99.09	99.09	99.39	99.39	99.09	99.39	99.09	98.78	99.09	99.39	99.09	98.48	98.48	94.41
Haemin uptake system outer membrane receptor	fig|6666666.157468.peg.1471	100	100	100	95.42	87.01	87.01	88.83	88.83	88.83	87.07	93.98	93.98	88.83	93.98	90.17	87.54	88.83	93.98	88.83	95.13	90.56	51.91
Peptide chain release factor 1	fig|6666666.157468.peg.1473	100	100	100	99.15	99.15	99.15	99.15	99.15	99.15	99.15	99.15	99.15	98.87	99.15	99.44	99.44	98.87	99.15	99.15	100	98.59	76.26
SSU ribosomal protein S20p	fig|6666666.157468.peg.1474	100	100	100	100	100	100	100	100	100	100	98.85	98.85	98.85	98.85	100	100	98.85	98.85	100	100	98.85	88.69
Phosphatidylglycerophosphatase A (EC 3.1.3.27)	fig|6666666.157468.peg.1475	100	100	100	100	100	100	100	100	100	100	100	100	100	100	98.19	98.8	100	100	100	100	98.19	92.93
Sulfate adenylyltransferase, dissimilatory-type (EC 2.7.7.4)	fig|6666666.157468.peg.1476	100	100	100	100	100	100	99.74	99.74	99.74	99.74	99.48	99.48	99.22	99.22	99.48	98.96	99.22	99.22	99.74	100	98.7	87.43
2-C-methyl-D-erythritol 4-phosphate cytidylyltransferase (EC 2.7.7.60) / 2-C-methyl-D-erythritol 2,4-cyclodiphosphate synthase (EC 4.6.1.12)	fig|6666666.157468.peg.1478	100	100	100	99.46	99.46	99.46	98.92	98.92	98.92	98.92	99.73	99.73	99.73	99.73	98.92	98.92	99.73	99.73	98.92	99.46	98.38	0
2,3,4,5-tetrahydropyridine-2,6-dicarboxylate N-succinyltransferase (EC 2.3.1.117)	fig|6666666.157468.peg.1480	100	100	100	99.74	99.74	99.74	98.96	98.96	98.96	98.96	100	100	100	100	98.96	98.7	100	100	98.96	99.74	98.7	88.52
Phosphoribosyl-AMP cyclohydrolase (EC 3.5.4.19) / Phosphoribosyl-ATP pyrophosphatase (EC 3.6.1.31)	fig|6666666.157468.peg.1481	100	100	100	98.55	98.55	98.55	99.03	99.03	99.03	99.03	100	100	100	100	99.03	99.03	100	100	98.55	100	97.58	82.1
Imidazole glycerol phosphate synthase cyclase subunit (EC 4.1.3.-)	fig|6666666.157468.peg.1482	100	100	100	98.82	98.82	98.82	99.61	99.61	99.61	99.61	100	100	100	100	98.82	98.82	100	100	98.82	100	98.82	88.39
Phosphoribosylformimino-5-aminoimidazole carboxamide ribotide isomerase (EC 5.3.1.16)	fig|6666666.157468.peg.1484	100	100	100	99.59	99.59	99.59	98.77	98.77	98.77	98.77	97.94	97.94	97.94	97.94	96.3	95.88	97.94	97.94	95.88	99.59	96.3	81.04
Imidazole glycerol phosphate synthase amidotransferase subunit (EC 2.4.2.-)	fig|6666666.157468.peg.1485	100	99.49	99.49	98.97	98.97	98.97	97.44	97.44	97.44	97.44	98.97	98.97	98.97	98.97	96.41	96.92	98.97	98.97	96.92	98.97	95.9	87.96
Histidinol-phosphatase (EC 3.1.3.15) / Imidazoleglycerol-phosphate dehydratase (EC 4.2.1.19)	fig|6666666.157468.peg.1486	100	100	100	99.72	99.72	99.72	99.15	99.15	99.15	99.15	99.72	99.72	99.72	99.72	98.86	98.58	99.72	99.43	98.86	99.15	98.86	78.97
Histidinol dehydrogenase (EC 1.1.1.23)	fig|6666666.157468.peg.1487	100	100	100	99.53	99.53	99.53	99.07	99.07	99.07	99.07	99.07	99.07	99.07	99.07	97.9	97.2	99.07	98.83	97.9	99.77	97.66	0
ATP phosphoribosyltransferase (EC 2.4.2.17)	fig|6666666.157468.peg.1488	100	100	100	100	100	100	99.33	99.33	99.33	99.33	100	100	100	100	99	99	100	99.67	98.66	100	96.99	85.14
LSU ribosomal protein L17p	fig|6666666.157468.peg.1489	100	100	100	100	100	100	100	100	100	100	100	100	100	100	100	100	100	100	100	100	97.44	100
DNA-directed RNA polymerase alpha subunit (EC 2.7.7.6)	fig|6666666.157468.peg.1490	100	100	100	99.41	99.41	99.41	99.7	99.7	99.7	99.7	99.41	99.41	99.41	99.41	99.7	99.7	99.41	99.41	99.7	99.7	97.03	97.56
SSU ribosomal protein S4p (S9e)	fig|6666666.157468.peg.1491	100	100	100	100	100	100	100	100	100	100	99.52	99.52	99.52	99.52	100	100	99.52	99.52	100	99.52	100	88.04
SSU ribosomal protein S11p (S14e)	fig|6666666.157468.peg.1492	100	100	100	100	100	100	100	100	100	100	100	100	100	100	100	100	100	100	100	100	99.23	83.52
SSU ribosomal protein S13p (S18e)	fig|6666666.157468.peg.1493	100	100	100	100	100	100	100	100	100	100	100	100	100	100	99.17	100	100	99.17	99.17	100	100	92.79
LSU ribosomal protein L36p	fig|6666666.157468.peg.1494	100	100	100	100	100	100	100	100	100	100	100	100	100	100	0	100	100	100	100	100	100	93.72
Translation initiation factor 1	fig|6666666.157468.peg.1495	100	100	100	100	100	100	100	100	100	100	100	100	100	100	100	100	100	100	100	100	100	76.98
L-Proline/Glycine betaine transporter ProP	fig|6666666.157468.peg.1497	100	100	100	95.54	95.54	95.54	98.14	98.14	98.14	98.14	98.38	98.38	98.61	98.61	98.14	97.91	98.61	98.61	98.38	59.39	96.59	97.85
Anaerobic dimethyl sulfoxide reductase chain C (EC 1.8.5.3)	fig|6666666.157468.peg.1501	100	100	100	0	0	0	0	0	0	0	0	0	0	0	96.64	0	0	0	96.64	0	0	85.36
Anaerobic dimethyl sulfoxide reductase chain C (EC 1.8.5.3)	fig|6666666.157468.peg.1502	100	100	100	0	0	0	0	0	0	0	0	0	0	0	100	0	0	0	100	0	0	97.41
Anaerobic dimethyl sulfoxide reductase chain C (EC 1.8.5.3)	fig|6666666.157468.peg.1503	100	100	100	0	0	0	0	0	0	0	0	0	0	0	98.04	0	0	0	98.04	0	0	72.9
Anaerobic dimethyl sulfoxide reductase chain B (EC 1.8.5.3)	fig|6666666.157468.peg.1504	100	100	100	31.55	31.55	31.55	31.55	31.55	97.37	31.55	31.55	31.55	98.28	31.55	97.71	31.55	31.55	31.55	96.82	31.55	31.55	0
Anaerobic dimethyl sulfoxide reductase chain A (EC 1.8.99.-)	fig|6666666.157468.peg.1505	100	100	100	31.46	31.46	31.46	31.46	31.46	31.46	31.46	31.46	31.46	31.46	31.46	98.94	31.13	31.46	31.74	98.94	0	35.16	95.8
Anaerobic dimethyl sulfoxide reductase chain A (EC 1.8.5.3)	fig|6666666.157468.peg.1506	100	100	100	0	0	0	0	0	0	100	0	0	0	0	95.56	0	0	0	95.56	0	0	66.06
Anaerobic dimethyl sulfoxide reductase chain A (EC 1.8.5.3)	fig|6666666.157468.peg.1507	100	100	100	29.6	29.6	29.6	29.6	29.6	96.23	29.6	29.6	29.6	29.6	29.6	98.01	0	0	0	97.66	29.6	29.89	0
Oligopeptide ABC transporter, periplasmic oligopeptide-binding protein OppA (TC 3.A.1.5.1)	fig|6666666.157468.peg.1508	100	100	100	90.73	90.73	90.73	89.31	88.26	89.31	89.31	90.73	90.73	90.73	90.73	90.22	89.92	90.73	90.73	90.22	97.85	92.94	0
Oligopeptide transport ATP-binding protein OppF (TC 3.A.1.5.1)	fig|6666666.157468.peg.1512	100	100	100	99.1	99.1	99.1	98.64	98.64	98.64	98.64	98.64	98.64	98.64	98.64	98.19	98.64	98.64	98.64	98.64	98.19	98.64	87.33
NADH ubiquinone oxidoreductase chain A (EC 1.6.5.3)	fig|6666666.157468.peg.1513	100	100	100	98.45	98.45	98.45	98.45	98.45	98.45	98.45	98.45	98.45	98.45	98.45	98.45	98.45	98.45	98.45	99.22	99.22	98.45	95.67
NADH-ubiquinone oxidoreductase chain B (EC 1.6.5.3)	fig|6666666.157468.peg.1514	100	100	100	99.4	99.4	99.4	99.4	99.4	99.4	99.4	99.4	99.4	99.4	99.4	99.4	99.4	99.4	99.4	99.4	99.4	100	66.43
NADH-ubiquinone oxidoreductase chain C (EC 1.6.5.3)	fig|6666666.157468.peg.1515	100	100	100	98.86	98.86	98.86	98.86	98.86	98.86	98.86	98.86	98.86	98.86	98.86	98.86	99.24	98.86	98.86	98.1	98.48	97.72	86.46
NADH-ubiquinone oxidoreductase chain D (EC 1.6.5.3)	fig|6666666.157468.peg.1516	100	100	100	99.75	99.75	99.75	99.75	99.75	99.75	99.75	99.51	99.51	99.51	99.75	99.51	99.75	99.51	99.51	99.75	99.75	99.51	92.76
NADH-ubiquinone oxidoreductase chain E (EC 1.6.5.3)	fig|6666666.157468.peg.1517	100	100	100	100	100	100	100	100	100	100	100	100	100	100	100	100	100	100	98.67	100	98.67	89.86
NADH-ubiquinone oxidoreductase chain G (EC 1.6.5.3)	fig|6666666.157468.peg.1519	100	100	100	99.27	99.27	99.27	99.51	99.51	99.51	99.51	100	100	100	99.88	100	98.17	100	100	98.9	99.63	97.8	85.14
NADH-ubiquinone oxidoreductase chain H (EC 1.6.5.3)	fig|6666666.157468.peg.1520	100	100	100	99.7	99.7	99.7	98.8	98.8	98.8	98.8	100	100	100	100	99.7	98.8	100	100	98.19	98.19	97.89	90.36
NADH-ubiquinone oxidoreductase chain I (EC 1.6.5.3)	fig|6666666.157468.peg.1521	100	100	100	99.06	99.06	99.06	98.12	98.12	98.12	98.12	98.59	98.59	98.59	100	100	98.59	98.59	100	97.65	98.12	97.65	84.66
NADH-ubiquinone oxidoreductase chain J (EC 1.6.5.3)	fig|6666666.157468.peg.1522	100	100	100	99.42	99.42	99.42	99.42	99.42	99.42	99.42	99.42	99.42	99.42	100	100	99.42	99.42	99.42	98.84	98.84	98.26	77.87
NADH-ubiquinone oxidoreductase chain K (EC 1.6.5.3)	fig|6666666.157468.peg.1523	100	100	100	98.98	98.98	98.98	98.98	98.98	98.98	98.98	98.98	98.98	98.98	100	100	97.96	98.98	100	100	100	98.98	79.92
NADH-ubiquinone oxidoreductase chain L (EC 1.6.5.3)	fig|6666666.157468.peg.1524	100	100	100	98.49	98.49	98.49	99.66	99.66	99.66	99.5	99.66	99.66	99.66	100	100	98.66	99.66	100	98.83	98.99	97.65	93.55
NADH-ubiquinone oxidoreductase chain M (EC 1.6.5.3)	fig|6666666.157468.peg.1525	100	100	100	98.99	98.99	98.99	100	100	100	100	100	100	100	100	100	97.58	100	99.8	99.19	98.79	97.37	93.8
NADH-ubiquinone oxidoreductase chain N (EC 1.6.5.3)	fig|6666666.157468.peg.1526	100	100	100	98.48	98.48	98.48	100	100	100	100	100	100	100	100	100	99.42	100	100	99.35	98.48	98.27	80.34
Paralysed flagella protein PflA	fig|6666666.157468.peg.1527	100	100	100	99.75	99.75	99.75	100	100	100	100	100	100	100	100	100	99.49	100	100	99.24	99.87	96.65	90.62
Arginine/ornithine antiporter ArcD	fig|6666666.157468.peg.1531	100	100	100	98.82	98.82	98.82	100	100	100	100	97.04	97.04	99.41	100	97.04	97.04	99.41	98.82	97.04	98.82	95.36	91.48
membrane protein	fig|6666666.157468.peg.1532	100	100	100	100	100	100	99.43	99.43	99.43	99.43	98.86	98.91	99.43	0	98.86	98.86	99.43	98.86	98.86	99.41	98.3	98.04
Membrane protease family protein HP0248	fig|6666666.157468.peg.1533	100	100	100	99.72	99.72	99.72	99.45	99.45	99.45	99.45	97.51	97.51	99.45	99.45	99.72	99.72	99.45	99.45	99.45	99.17	98.62	87.95
Branched-chain amino acid aminotransferase (EC 2.6.1.42)	fig|6666666.157468.peg.1534	100	100	100	98.36	98.36	98.36	99.01	99.01	99.01	99.01	98.36	98.36	99.01	99.01	98.36	99.01	99.01	99.01	98.36	99.34	95.39	87.62
4-oxalocrotonate tautomerase (EC 5.3.2.-)	fig|6666666.157468.peg.1535	100	100	100	97.06	97.06	97.06	97.06	97.06	97.06	97.06	97.06	97.06	97.06	97.06	97.06	97.06	97.06	97.06	97.06	100	82.35	92.05
Thiol peroxidase, Bcp-type (EC 1.11.1.15)	fig|6666666.157468.peg.1536	100	100	100	99.34	99.34	99.34	98.68	98.68	98.68	98.68	96.69	96.69	98.68	98.68	96.69	98.68	98.68	99.34	96.69	98.01	95.36	98.02
FIG053235: Diacylglucosamine hydrolase like	fig|6666666.157468.peg.1537	100	100	100	96.42	96.42	96.42	98.9	98.9	98.9	98.9	95.87	95.87	98.9	98.9	95.59	97.25	98.9	99.17	95.87	99.17	97.52	82.14
3-hydroxyacyl-[acyl-carrier-protein] dehydratase, FabZ form (EC 4.2.1.59)	fig|6666666.157468.peg.1538	100	100	100	100	100	100	99.32	99.32	99.32	99.32	98.63	98.63	99.32	99.32	99.32	100	99.32	100	99.32	99.32	100	94.05
Acyl-[acyl-carrier-protein]--UDP-N-acetylglucosamine O-acyltransferase (EC 2.3.1.129)	fig|6666666.157468.peg.1539	100	100	100	98.48	98.48	98.48	99.62	99.62	99.62	99.62	98.86	98.86	99.62	99.62	98.86	99.24	99.62	99.62	98.86	99.62	96.96	73.9
ATP-dependent Clp protease ATP-binding subunit ClpX	fig|6666666.157468.peg.1540	100	100	100	100	100	100	99.51	99.51	99.51	99.26	99.75	99.75	99.51	99.51	100	99.51	99.51	99.51	99.75	99.75	99.26	84.63
Rod shape-determining protein MreB	fig|6666666.157468.peg.1541	100	100	100	100	100	100	99.71	99.71	99.71	99.71	100	100	99.71	99.42	100	99.42	99.71	99.71	100	100	99.42	77.03
Rod shape-determining protein MreC	fig|6666666.157468.peg.1542	100	100	100	99.2	99.2	99.2	99.6	99.6	99.15	99.15	99.58	99.58	99.15	99.6	99.6	99.15	99.15	99.15	99.15	100	98.39	89.26
Carbamoyl-phosphate synthase large chain (EC 6.3.5.5)	fig|6666666.157468.peg.1543	100	100	100	98.71	98.71	98.71	98.81	98.81	98.81	98.81	98.81	98.81	98.81	98.81	98.71	98.81	98.81	98.9	98.71	98.35	98.44	76.04
TsaC protein (YrdC domain) required for threonylcarbamoyladenosine t(6)A37 modification in tRNA	fig|6666666.157468.peg.1544	100	100	100	100	100	100	100	100	100	100	100	100	100	100	100	98.57	100	100	100	100	85	28.17
Transaldolase (EC 2.2.1.2)	fig|6666666.157468.peg.1545	100	100	100	99.38	99.38	99.38	99.08	99.08	99.08	99.08	98.77	98.77	99.08	99.08	99.38	98.46	99.08	99.08	99.38	99.08	97.23	86.97
Phosphoserine phosphatase (EC 3.1.3.3)	fig|6666666.157468.peg.1546	100	100	100	97.58	97.58	97.58	100	100	100	100	99.03	99.03	100	100	96.14	97.1	100	100	96.62	100	96.14	85.98
Positive regulator of CheA protein activity (CheW)	fig|6666666.157468.peg.1547	100	100	100	100	100	100	100	100	100	100	100	100	100	100	100	100	100	100	100	100	100	85.93
Signal transduction histidine kinase CheA (EC 2.7.3.-)	fig|6666666.157468.peg.1548	100	100	100	99.87	99.87	99.87	100	100	100	100	98.96	98.96	100	99.87	98.83	99.09	100	100	99.09	99.87	98.83	50.13
Chemotaxis protein CheV (EC 2.7.3.-)	fig|6666666.157468.peg.1549	100	100	100	100	100	100	100	100	100	100	98.74	98.74	100	100	99.69	99.06	100	100	99.69	100	98.74	0
Transcription elongation factor GreA	fig|6666666.157468.peg.1551	100	100	100	100	100	100	100	100	100	100	99.38	99.38	100	100	98.76	98.76	100	99.38	98.76	100	98.14	99.19
Lipid-A-disaccharide synthase (EC 2.4.1.182)	fig|6666666.157468.peg.1552	100	100	100	99.45	99.45	99.45	96.98	96.98	96.98	96.98	96.98	96.98	96.98	96.98	95.88	95.6	96.98	97.4	95.88	99.73	94.51	75.39
Major antigenic peptide PEB3	fig|6666666.157468.peg.1553	100	100	100	100	100	100	99.6	99.6	99.6	99.6	99.2	99.2	99.6	99.6	99.6	100	99.6	99.6	99.6	100	97.78	76.88
Phosphoglycerate transporter protein pgtP	fig|6666666.157468.peg.1554	100	100	100	98.61	98.61	98.61	95.31	95.31	95.31	95.31	95	95	95.31	95	94	95	95.31	96.27	95	0	92.78	0
Glycerol-3-phosphate transporter	fig|6666666.157468.peg.1555	100	100	100	97.48	97.48	97.48	98.57	98.57	98.57	98.57	98.57	98.57	98.57	95.96	92.86	97.06	98.57	98.57	98.57	0	92.45	98.63
5-nucleotidase SurE (EC 3.1.3.5)	fig|6666666.157468.peg.1556	100	100	100	96.75	96.75	96.75	100	100	100	100	100	100	100	100	99.61	100	100	100	100	100	95.74	94.7
MoeB/thiF family protein	fig|6666666.157468.peg.1557	100	100	100	97.71	97.71	97.71	99.54	99.54	99.54	99.54	99.54	99.54	99.54	99.54	94.91	99.07	99.54	99.54	100	95.33	98.13	100
Aspartate 1-decarboxylase (EC 4.1.1.11)	fig|6666666.157468.peg.1559	100	100	100	98.41	98.41	98.41	99.21	99.21	99.21	99.21	99.21	99.21	99.21	99.21	97.62	97.62	99.21	99.21	99.21	97.62	95.24	75.74
Pantoate--beta-alanine ligase (EC 6.3.2.1)	fig|6666666.157468.peg.1560	100	100	100	99.65	99.65	99.65	100	100	100	100	100	100	100	100	96.81	95.04	100	100	100	95.04	94.68	97.27
3-methyl-2-oxobutanoate hydroxymethyltransferase (EC 2.1.2.11)	fig|6666666.157468.peg.1561	100	100	100	99.27	99.27	99.27	99.27	99.27	99.27	99.27	99.27	99.27	100	99.27	98.18	98.54	99.27	99.27	99.27	98.54	95.26	90.26
Molybdenum transport ATP-binding protein ModC (TC 3.A.1.8.1)	fig|6666666.157468.peg.1563	100	100	100	80.61	80.61	80.61	100	100	100	100	100	100	100	100	79.93	79.93	100	100	100	79.93	36.67	85.67
Molybdenum transport system permease protein ModB (TC 3.A.1.8.1)	fig|6666666.157468.peg.1564	100	100	100	85.07	85.07	85.07	100	100	100	100	100	100	100	100	85.52	85.52	100	100	100	85.07	93.7	82.03
Molybdenum ABC transporter, periplasmic molybdenum-binding protein ModA (TC 3.A.1.8.1)	fig|6666666.157468.peg.1566	100	100	100	80.72	80.72	80.72	99.6	99.6	99.6	99.6	97.99	97.99	97.99	97.99	80.32	80.32	97.99	97.99	97.99	79.92	94.03	92.37
Biotin synthesis protein BioC	fig|6666666.157468.peg.1567	100	100	100	74.56	74.56	74.56	78.07	78.07	78.07	78.07	93.86	93.86	93.86	93.86	75.44	75.44	93.86	93.86	93.86	75	95.18	97.84
Biotin synthesis protein BioG	fig|6666666.157468.peg.1568	100	100	100	93.6	93.6	93.6	67	67	97.54	67	92.12	92.12	92.12	92.12	67	67	92.12	92.12	92.12	66.5	89.66	97.63
8-amino-7-oxononanoate synthase (EC 2.3.1.47)	fig|6666666.157468.peg.1569	100	100	100	97.37	97.37	97.37	75.53	75.53	75.53	75.53	97.37	97.37	97.37	97.37	75.53	75.26	97.37	97.37	97.37	75.26	96.05	80.43
Adenosylmethionine-8-amino-7-oxononanoate aminotransferase (EC 2.6.1.62)	fig|6666666.157468.peg.1570	100	100	100	99.06	99.06	99.06	97.19	97.19	97.19	97.19	98.83	98.83	93.44	98.83	97.19	93.21	98.83	98.59	98.83	97.42	92.04	84.9
Dethiobiotin synthetase (EC 6.3.3.3)	fig|6666666.157468.peg.1571	100	100	100	100	100	100	100	100	100	100	100	100	97.51	100	100	99	100	100	100	100	95.02	32.16
Quaternary ammonium compound-resistance protein SugE	fig|6666666.157468.peg.1572	100	100	100	100	100	100	100	100	100	100	100	100	97.12	100	99.04	100	100	100	97.12	95.19	96.15	97
Quaternary ammonium compound-resistance protein SugE	fig|6666666.157468.peg.1573	100	100	100	99.11	99.11	99.11	99.11	99.11	99.11	99.11	99.11	99.11	98.21	99.11	99.11	100	99.11	99.11	98.21	100	97.32	91.21
LSU ribosomal protein L25p	fig|6666666.157468.peg.1574	100	100	100	100	100	100	100	100	100	100	100	100	100	100	99.44	100	100	100	100	100	100	0
Peptidyl-tRNA hydrolase (EC 3.1.1.29)	fig|6666666.157468.peg.1575	100	100	100	98.9	98.9	98.9	99.45	99.45	99.45	99.45	99.45	99.45	99.45	99.45	100	99.45	99.45	99.45	100	99.45	97.79	94.92
Permease YjgP/YjgQ	fig|6666666.157468.peg.1576	100	100	100	99.15	99.15	99.15	98.86	98.86	98.86	98.86	98.86	98.86	98.86	98.86	99.43	98.58	98.86	98.86	98.58	98.86	97.16	91
Diaminopimelate decarboxylase (EC 4.1.1.20)	fig|6666666.157468.peg.1577	100	100	100	98.76	98.76	98.76	98.26	98.26	98.26	98.26	98.26	98.26	98.26	98.26	99.5	99	98.26	98.26	99	99.25	98.51	85.37
Chorismate mutase I (EC 5.4.99.5) / Prephenate dehydratase (EC 4.2.1.51)	fig|6666666.157468.peg.1579	100	100	100	100	100	100	100	100	100	100	100	100	100	100	98.88	98.6	100	100	98.88	99.16	99.16	0
Biosynthetic Aromatic amino acid aminotransferase beta (EC 2.6.1.57) @ Histidinol-phosphate aminotransferase (EC 2.6.1.9)	fig|6666666.157468.peg.1580	100	100	100	97.53	97.53	97.53	97.53	97.53	97.53	97.53	97.53	97.53	97.53	97.53	96.98	96.7	97.53	97.53	96.15	97.25	93.96	87.22
Flagellar M-ring protein FliF	fig|6666666.157468.peg.1581	100	100	100	100	100	100	99.64	99.64	99.64	99.64	99.82	99.82	99.64	99.82	99.82	99.82	99.64	99.82	100	100	98.39	84.07
Flagellar motor switch protein FliG	fig|6666666.157468.peg.1582	100	100	100	100	100	100	100	100	100	100	100	100	100	100	100	100	100	100	100	100	99.42	98.92
Flagellar assembly protein FliH	fig|6666666.157468.peg.1583	100	100	100	98.91	98.91	98.91	98.91	98.91	98.91	98.91	98.91	98.91	98.91	98.91	98.55	98.55	98.91	98.91	98.55	98.91	96.74	0
1-deoxy-D-xylulose 5-phosphate synthase (EC 2.2.1.7)	fig|6666666.157468.peg.1584	100	100	100	99.51	99.51	99.51	99.51	99.51	99.51	99.51	99.51	99.51	99.51	99.51	99.67	99.02	99.51	99.51	99.02	99.51	97.89	79.17
Peroxide stress regulator; Ferric uptake regulation protein; Fe2+/Zn2+ uptake regulation proteins	fig|6666666.157468.peg.1585	100	100	100	99.26	99.26	99.26	97.79	97.79	97.79	97.79	98.53	98.53	97.79	97.79	100	100	97.79	98.53	100	99.26	96.32	64.29
Ubiquinone/menaquinone biosynthesis methyltransferase UbiE (EC 2.1.1.-) @ 2-heptaprenyl-1,4-naphthoquinone methyltransferase (EC 2.1.1.163)	fig|6666666.157468.peg.1587	100	100	100	100	100	100	98.72	98.72	98.72	98.72	98.72	98.72	98.72	98.72	100	98.72	98.72	98.72	98.72	100	91.91	84.96
Exodeoxyribonuclease VII large subunit (EC 3.1.11.6)	fig|6666666.157468.peg.1588	100	100	100	100	100	100	99.74	99.74	99.74	99.74	99.74	99.74	99.74	99.74	100	98.71	99.74	99.74	98.71	99.74	95.35	82.52
Phosphoserine aminotransferase (EC 2.6.1.52)	fig|6666666.157468.peg.1589	100	100	100	99.44	99.44	99.44	98.6	98.6	98.6	98.6	98.6	98.6	98.6	98.6	99.44	98.6	98.6	98.6	98.88	99.72	96.37	93.65
Translation initiation inhibitor	fig|6666666.157468.peg.1590	100	100	100	99.14	99.14	99.14	98.28	98.28	98.28	98.28	98.28	98.28	98.28	98.28	99.14	98.28	98.28	98.28	98.28	98.28	93.1	81.03
3-oxoacyl-[acyl-carrier-protein] synthase, KASIII (EC 2.3.1.180)	fig|6666666.157468.peg.1591	100	100	100	99.38	99.38	99.38	98.77	98.77	98.77	98.77	98.77	98.77	98.77	98.77	98.77	98.15	98.77	98.46	98.15	100	97.22	87.65
Phosphate:acyl-ACP acyltransferase PlsX	fig|6666666.157468.peg.1592	100	100	100	98.78	98.78	98.78	98.78	98.78	98.78	97.56	98.17	98.17	98.17	98.17	98.78	98.48	98.17	98.17	98.78	100	97.56	98.46
LSU ribosomal protein L32p	fig|6666666.157468.peg.1593	100	100	100	100	100	100	100	100	100	100	100	100	100	100	100	97.92	100	100	97.92	100	97.92	92.9
Nucleoside diphosphate kinase (EC 2.7.4.6)	fig|6666666.157468.peg.1595	100	100	100	100	100	100	98.54	98.54	98.54	98.54	98.54	98.54	98.54	98.54	99.27	100	98.54	98.54	100	100	99.26	75.76
Ferredoxin	fig|6666666.157468.peg.1596	100	100	100	97.87	97.87	97.87	96.81	96.81	96.81	96.81	96.81	96.81	96.81	96.81	98.94	98.94	96.81	96.81	98.94	98.94	98.94	75.33
Alkyl hydroperoxide reductase subunit C-like protein	fig|6666666.157468.peg.1597	100	100	100	100	100	100	100	100	100	100	99.49	99.49	100	100	100	100	100	100	100	100	100	52.59
Flagellar biosynthesis protein FlhB	fig|6666666.157468.peg.1598	100	100	100	100	100	100	99.72	99.72	99.72	99.72	99.72	99.72	99.72	99.72	99.44	99.72	99.72	99.72	100	99.72	98.62	91.8
Flagellar motor rotation protein MotB	fig|6666666.157468.peg.1599	100	100	100	99.19	99.19	99.19	99.59	99.59	99.59	99.59	99.59	99.59	99.59	99.59	100	100	99.59	99.59	100	100	98.78	63.82
Flagellar motor rotation protein MotA	fig|6666666.157468.peg.1600	100	100	100	99.61	99.61	99.61	98.06	98.06	98.06	97.67	99.61	99.61	99.61	99.61	98.84	98.06	99.61	99.61	98.06	99.61	97.67	87.13
DNA polymerase I (EC 2.7.7.7)	fig|6666666.157468.peg.1601	100	100	100	98.86	98.86	98.86	98.29	98.29	98.29	98.29	99.54	99.54	99.54	99.54	99.54	98.41	99.54	99.54	98.29	98.75	96.36	83.83
Inosine-uridine preferring nucleoside hydrolase (EC 3.2.2.1)	fig|6666666.157468.peg.1603	100	100	100	97.91	97.91	97.91	97.01	97.01	97.01	97.01	98.21	98.21	98.21	98.21	99.4	97.01	98.21	98.21	96.72	99.1	0	92.7
FIG00732228: membrane protein	fig|6666666.157468.peg.1604	100	100	100	99.32	99.32	99.32	99.32	99.32	99.32	96.75	99.32	99.32	99.32	99.32	100	95.92	99.32	99.24	95.92	99.32	85.03	77.42
Excinuclease ABC subunit A	fig|6666666.157468.peg.1605	100	100	100	99.47	99.47	99.47	99.04	99.04	99.04	99.04	99.57	99.57	99.57	99.57	99.57	99.47	99.57	99.57	99.47	99.36	98.72	61.46
Arginine/ornithine antiporter ArcD	fig|6666666.157468.peg.1606	100	100	100	99.62	99.62	99.62	99.23	99.23	99.23	99.23	100	100	100	100	100	99.62	100	100	99.23	99.23	98.47	95.89
Anthranilate synthase, aminase component (EC 4.1.3.27)	fig|6666666.157468.peg.1608	100	100	100	98.8	98.8	98.8	99.76	99.76	99.76	99.76	100	100	100	100	100	99.04	100	100	99.04	98.8	97.36	0
Anthranilate synthase, amidotransferase component (EC 4.1.3.27) / Anthranilate phosphoribosyltransferase (EC 2.4.2.18)	fig|6666666.157468.peg.1609	100	100	100	98.31	98.31	98.31	99.06	99.06	99.06	99.06	99.44	99.44	99.44	99.44	99.62	98.31	99.44	99.25	98.12	99.81	96.06	0
Phosphoribosylanthranilate isomerase (EC 5.3.1.24)	fig|6666666.157468.peg.1610	100	100	100	95.48	95.48	95.48	97.99	97.99	97.99	97.99	98.49	98.49	98.49	98.49	100	95.48	98.49	98.49	95.48	98.49	92.96	87.09
Tryptophan synthase beta chain (EC 4.2.1.20)	fig|6666666.157468.peg.1611	100	100	100	99.49	99.49	99.49	100	100	100	100	100	100	100	100	100	100	100	100	99.49	100	97.7	96.29
Tryptophan synthase alpha chain (EC 4.2.1.20)	fig|6666666.157468.peg.1612	100	100	100	97.59	97.59	97.59	97.99	97.99	97.99	97.99	98.39	98.39	98.39	98.39	98.8	98.39	98.39	98.39	97.59	98.39	96.39	87.46
Flagellar motor switch protein FliN	fig|6666666.157468.peg.1614	100	100	100	99.02	99.02	99.02	100	100	100	26.25	100	100	100	100	100	99.02	100	100	100	100	100	87.26
Exopolyphosphatase (EC 3.6.1.11)	fig|6666666.157468.peg.1616	100	100	100	99.59	99.59	99.59	99.59	99.59	99.59	99.59	99.59	99.59	99.59	99.59	99.79	99.59	99.59	99.59	99.59	99.59	99.18	90.43
4Fe-4S ferredoxin, iron-sulfur binding	fig|6666666.157468.peg.1617	100	100	100	98.77	98.77	98.77	100	100	100	100	100	100	100	100	100	100	100	100	100	100	98.77	89.71
Phosphate regulon transcriptional regulatory protein PhoB (SphR)	fig|6666666.157468.peg.1618	100	100	100	99.1	99.1	99.1	99.55	99.55	99.55	31.36	99.1	99.1	99.1	100	100	99.1	99.1	99.1	100	99.1	98.65	83.74
Dihydroneopterin aldolase (EC 4.1.2.25)	fig|6666666.157468.peg.1619	100	100	100	100	100	100	100	100	100	100	100	100	100	100	99.05	100	100	100	99.05	99.05	97.14	55.78
Acyl-phosphate:glycerol-3-phosphate O-acyltransferase PlsY	fig|6666666.157468.peg.1620	100	100	100	98.51	98.51	98.51	100	100	100	100	98.51	98.51	98.51	98.51	99.5	98.51	98.51	98.51	99.5	98.02	96.53	66.95
Cytochrome c551 peroxidase (EC 1.11.1.5)	fig|6666666.157468.peg.1621	100	100	100	99.41	99.41	99.41	100	100	100	100	99.41	99.41	99.41	100	100	99.41	99.41	99.41	100	99.41	96.62	97.87
Phosphoglucosamine mutase (EC 5.4.2.10)	fig|6666666.157468.peg.1622	100	100	100	99.33	99.33	99.33	100	100	100	100	99.33	99.33	99.33	100	99.78	99.33	99.33	99.33	99.78	99.33	98.2	95.65
Lipoprotein signal peptidase (EC 3.4.23.36)	fig|6666666.157468.peg.1623	100	100	100	100	100	100	99.36	99.36	99.36	99.36	100	100	100	100	98.08	99.36	100	100	98.08	100	97.44	87.02
Protoporphyrinogen IX oxidase, novel form, HemJ (EC 1.3.-.-)	fig|6666666.157468.peg.1624	100	100	100	100	100	100	98	98	98	98	100	100	100	100	98.67	100	100	100	98.67	100	100	91.04
RND efflux system, outer membrane lipoprotein CmeC	fig|6666666.157468.peg.1627	100	100	100	99.19	99.19	99.19	99.19	99.19	99.19	99.19	99.19	99.19	99.19	99.19	99.39	97.93	99.19	99.19	98.37	98.78	97.52	73.05
RND efflux system, inner membrane transporter CmeB	fig|6666666.157468.peg.1628	100	100	100	99.04	99.04	99.04	99.23	99.23	99.23	99.23	99.13	99.13	99.13	99.23	99.81	98.94	99.13	99.13	99.62	100	97.79	0
RND efflux system, membrane fusion protein CmeA	fig|6666666.157468.peg.1629	100	100	100	100	100	100	100	100	100	100	100	100	100	100	98.37	98.37	100	100	99.46	99.73	96.19	0
Transcriptional repressor of CmeABC operon, CmeR	fig|6666666.157468.peg.1630	100	100	100	99.52	99.52	99.52	99.52	99.52	99.52	99.52	99.52	99.52	99.52	99.52	99.05	98.1	99.52	99.52	99.05	98.57	95.71	83.08
Ferredoxin domain-containing integral membrane protein	fig|6666666.157468.peg.1631	100	100	100	100	100	100	100	100	100	100	100	100	100	100	99.13	99.34	100	100	98.91	100	97.6	96.43
SSU ribosomal protein S21p	fig|6666666.157468.peg.1632	100	100	100	100	100	100	100	100	100	100	100	100	100	100	100	100	100	100	100	100	98.57	90.93
FIG01388762: membrane lipoprotein	fig|6666666.157468.peg.1633	100	100	100	100	100	100	100	100	100	100	100	100	100	100	100	100	100	100	100	100	98.01	85.66
Similarity with glutathionylspermidine synthase (EC 6.3.1.8), group 2	fig|6666666.157468.peg.1634	100	100	100	100	100	100	100	100	100	100	100	100	100	100	99.49	99.74	100	100	99.49	100	98.46	64.17
D-3-phosphoglycerate dehydrogenase (EC 1.1.1.95)	fig|6666666.157468.peg.1635	100	100	100	100	100	100	100	100	100	100	100	100	100	100	99.04	100	100	100	98.71	99.68	97.75	79.25
Cell division protein FtsH (EC 3.4.24.-)	fig|6666666.157468.peg.1639	100	100	100	99.12	99.12	99.12	99.65	99.65	99.65	99.65	99.47	99.47	99.47	99.3	99.82	100	99.3	99.47	99.65	99.65	98.6	77.94
membrane protein	fig|6666666.157468.peg.1640	100	100	100	97.21	97.21	97.21	98.42	98.42	98.42	98.42	98.42	98.42	98.42	97.21	98.95	97.89	97.21	97.21	98.95	98.42	96.32	86.81
Orotidine 5'-phosphate decarboxylase (EC 4.1.1.23)	fig|6666666.157468.peg.1643	100	100	100	99.28	99.28	99.28	99.64	99.64	99.64	99.64	99.28	99.28	98.92	98.92	93.36	99.64	98.92	99.28	93.36	100	92.48	79.53
Transcription termination protein NusB	fig|6666666.157468.peg.1644	100	100	100	100	100	100	100	100	100	100	100	100	100	100	99.24	99.24	100	100	99.24	100	97.73	90.69
6,7-dimethyl-8-ribityllumazine synthase (EC 2.5.1.78)	fig|6666666.157468.peg.1645	100	100	100	100	100	100	100	100	100	100	100	100	100	100	100	100	100	100	99.35	100	98.05	84.81
2-Keto-3-deoxy-D-manno-octulosonate-8-phosphate synthase (EC 2.5.1.55)	fig|6666666.157468.peg.1646	100	100	100	98.52	98.52	98.52	98.52	98.52	98.52	98.52	98.52	98.52	98.52	98.52	98.52	99.26	98.52	98.52	98.15	98.52	98.5	98.2
FIG00732228: membrane protein	fig|6666666.157468.peg.1647	100	100	100	99.35	99.33	99.35	99.35	99.35	99.35	99.35	99.35	99.35	99.03	99.03	98.39	98.39	99.03	99.35	98.39	99.35	98.39	84.3
GTP-binding protein EngA	fig|6666666.157468.peg.1648	100	100	100	99.57	99.57	99.57	99.78	99.78	99.78	99.78	99.78	99.78	99.78	99.78	99.78	99.78	99.78	99.78	99.78	99.78	98.04	93.82
Shikimate kinase I (EC 2.7.1.71)	fig|6666666.157468.peg.1649	100	100	100	99.39	99.39	99.39	100	100	100	100	100	100	100	99.39	98.17	98.17	100	100	98.17	100	93.9	72.69
Tryptophanyl-tRNA synthetase (EC 6.1.1.2)	fig|6666666.157468.peg.1650	100	100	100	98.75	98.75	98.75	98.75	98.75	98.75	98.75	98.75	98.75	98.75	98.75	98.12	98.12	98.75	98.75	98.12	98.75	96.87	0
Seryl-tRNA synthetase (EC 6.1.1.11)	fig|6666666.157468.peg.1651	100	100	100	98.78	98.78	98.78	99.03	99.03	99.03	99.5	99.03	99.03	99.03	99.03	99.51	99.76	99.03	99.03	98.78	98.78	98.3	87.23
membrane protein	fig|6666666.157468.peg.1652	100	100	100	99.39	99.39	99.39	99.51	99.51	99.51	99.51	99.39	99.39	99.51	99.51	98.78	98.78	99.51	99.51	98.78	98.9	97.93	93.39
Pyruvate kinase (EC 2.7.1.40)	fig|6666666.157468.peg.1654	100	100	100	99.58	99.58	99.58	99.38	99.38	99.38	100	99.38	99.38	99.38	99.38	99.38	99.79	99.38	99.38	99.38	98.96	98.54	96.62
Malate:quinone oxidoreductase (EC 1.1.5.4)	fig|6666666.157468.peg.1655	100	100	100	98.66	98.66	98.66	98.88	98.88	98.88	98.88	99.11	99.11	99.11	99.11	98.88	99.11	99.11	99.11	98.88	99.78	98.88	86.25
Pantothenate kinase type III, CoaX-like (EC 2.7.1.33)	fig|6666666.157468.peg.1656	100	100	100	100	100	100	99.04	99.04	99.04	99.04	99.52	99.52	99.04	99.52	100	100	99.04	99.52	100	99.52	99.04	84.08
Aspartyl-tRNA(Asn) amidotransferase subunit C (EC 6.3.5.6) @ Glutamyl-tRNA(Gln) amidotransferase subunit C (EC 6.3.5.7)	fig|6666666.157468.peg.1660	100	100	100	100	100	100	100	100	100	100	100	100	100	100	98.94	98.94	100	100	98.94	100	97.87	0
Colicin V production protein	fig|6666666.157468.peg.1661	100	100	100	97.33	97.33	97.33	97.86	97.86	97.86	97.86	97.86	97.86	97.86	97.86	98.93	98.4	97.86	97.86	98.93	98.4	97.3	77.61
Ferric uptake regulation protein FUR	fig|6666666.157468.peg.1662	100	100	100	100	100	100	100	100	100	100	100	100	100	100	100	100	100	100	100	99.36	100	91.23
Lysyl-tRNA synthetase (class II) (EC 6.1.1.6)	fig|6666666.157468.peg.1663	100	100	100	99.6	99.6	99.6	99.8	99.8	99.8	99.8	99.8	99.8	99.8	99.8	99.8	98.6	99.8	99.6	98.6	99	98.2	85.64
Serine hydroxymethyltransferase (EC 2.1.2.1)	fig|6666666.157468.peg.1664	100	100	100	99.52	99.52	99.52	98.79	98.79	98.79	98.79	98.79	98.79	98.79	98.79	98.31	99.28	98.79	98.79	99.28	99.52	98.55	0
Arginine/ornithine antiporter ArcD	fig|6666666.157468.peg.1666	100	100	100	98.56	98.56	98.56	98.2	98.2	98.2	98.2	98.56	98.56	98.2	98.56	96.76	98.92	98.2	98.56	98.2	96.76	96.4	94.99
Shikimate 5-dehydrogenase I alpha (EC 1.1.1.25)	fig|6666666.157468.peg.1667	100	100	100	99.62	99.62	99.62	99.62	99.62	99.62	99.62	99.62	99.62	99.24	99.24	96.56	98.47	99.62	99.62	98.47	99.62	97.33	0
Prolipoprotein diacylglyceryl transferase (EC 2.4.99.-)	fig|6666666.157468.peg.1669	100	100	100	99.63	99.63	99.63	100	100	100	100	100	100	100	100	99.26	100	100	100	100	99.63	98.15	76.02
Fumarate reductase cytochrome b subunit	fig|6666666.157468.peg.1670	100	100	100	100	100	100	100	100	100	100	99.62	99.62	100	100	100	100	100	100	100	100	99.62	94.39
Succinate dehydrogenase flavoprotein subunit (EC 1.3.99.1)	fig|6666666.157468.peg.1671	100	100	100	100	100	100	99.85	99.85	99.85	99.85	100	100	100	100	100	100	100	100	99.85	99.85	99.55	86.67
Succinate dehydrogenase iron-sulfur protein (EC 1.3.99.1)	fig|6666666.157468.peg.1672	100	100	100	99.59	99.59	99.59	100	100	100	100	100	100	100	100	100	100	100	100	100	100	100	85.07
Gluconate 2-dehydrogenase (EC 1.1.99.3), membrane-bound, flavoprotein	fig|6666666.157468.peg.1677	100	100	100	99.83	99.83	99.83	99.83	99.83	99.83	99.54	99.83	99.83	99.83	99.83	99.65	99.48	99.83	99.83	99.83	99.65	94.48	93.75
SrpA-related protein	fig|6666666.157468.peg.1679	100	100	100	98.29	98.29	98.29	98.72	98.72	98.72	98.72	98.72	98.72	98.72	98.72	94.61	99.57	98.72	98.72	98.29	98.72	97.01	0
Diadenosine tetraphosphate (Ap4A) hydrolase and other HIT family hydrolases	fig|6666666.157468.peg.1680	100	100	100	99.17	99.17	99.17	99.17	99.17	99.17	99.17	99.17	99.17	99.17	99.17	99.17	100	99.17	99.17	99.17	100	99.16	83.2
membrane protein	fig|6666666.157468.peg.1682	100	100	100	95.91	95.91	95.91	99.69	99.69	99.69	99.69	99.69	99.69	99.69	99.69	95.28	100	99.69	99.37	95.28	97.8	94.65	99.27
ABC transporter ATP-binding protein	fig|6666666.157468.peg.1687	100	100	100	99.62	99.62	99.62	100	100	100	100	100	100	100	100	99.24	99.43	100	99.81	99.05	98.86	98.29	67.91
FIG000605: protein co-occurring with transport systems (COG1739)	fig|6666666.157468.peg.1690	100	100	100	100	100	100	98.97	98.97	98.97	98.97	98.97	98.97	98.97	98.97	97.42	97.94	98.97	98.97	98.45	98.97	98.45	80.61
Arginine/ornithine antiporter ArcD	fig|6666666.157468.peg.1691	100	100	100	99.51	99.51	99.51	99.26	99.26	99.26	99.26	99.51	99.51	99.26	99.26	99.26	98.28	99.26	99.51	99.51	99.02	98.04	48.31
CMP-N-acetylneuraminate-beta-galactosamide-alpha-2,3-sialyltransferase (EC 2.4.99.-)	fig|6666666.157468.peg.1693	100	36.05	36.05	35.48	35.48	35.48	36.67	36.67	99.07	33.33	38.64	38.64	38.64	38.64	44.71	43	38.64	38.64	41.86	35.23	42.99	91.48
Hydrogenase-4 component A (EC 1.-.-.-)	fig|6666666.157468.peg.1694	100	0	0	0	0	0	0	0	0	0	0	0	0	0	0	0	0	0	0	0	0	84.71
FIG00732228: membrane protein	fig|6666666.157468.peg.1700	100	100	100	54.19	54.19	54.19	63.08	63.2	63.08	78.68	63.08	63.08	90.53	40.53	31.61	0	0	0	63.07	100	0	71.72
Cytochrome c family protein	fig|6666666.157468.peg.1704	100	100	100	99.71	99.71	99.71	99.71	99.71	99.71	99.71	99.71	99.71	99.42	99.71	100	99.18	100	99.42	99.71	99.71	99.71	83.05
Arginine/ornithine antiporter ArcD	fig|6666666.157468.peg.1705	100	100	100	98.6	98.6	98.6	95.81	95.81	95.81	95.81	95.81	95.81	95.81	97.21	99.53	95.35	99.07	95.81	95.81	99.53	92.09	80.72
GTP-binding protein TypA/BipA	fig|6666666.157468.peg.1706	100	100	100	99.31	99.31	99.31	99.31	99.31	99.31	99.31	99.31	99.31	99.31	99.31	99.83	99.83	99.31	99.31	99.83	99.31	98.97	76.26
Flagellar hook-length control protein FliK	fig|6666666.157468.peg.1708	100	100	100	98.99	98.99	98.99	98.99	98.99	98.99	98.99	98.99	98.99	99.16	97.65	96.39	98.66	99.16	99.16	97.45	100	93.46	0
Flagellar basal-body rod modification protein FlgD	fig|6666666.157468.peg.1709	100	100	100	100	100	100	99.66	99.66	99.66	99.66	99.66	99.66	100	100	100	100	100	100	100	100	82.24	92.19
Flagellar hook protein FlgE	fig|6666666.157468.peg.1710	100	100	100	99.63	99.63	99.63	99.82	99.82	99.82	99.82	99.82	99.82	99.82	99.82	99.63	99.63	99.82	99.63	99.45	99.82	96.88	97.76
Hemerythrin-like iron-binding protein	fig|6666666.157468.peg.1712	100	99.63	100	95.69	95.69	95.69	99.63	99.63	99.63	99.63	99.16	99.16	99.63	97.08	98.52	97.25	100	97.07	97.07	97.25	92.5	98.07
C4-dicarboxylate transporter	fig|6666666.157468.peg.1713	100	100	100	97.96	97.96	97.96	82.93	82.93	82.93	82.93	100	100	82.93	0	81.4	93.48	82.93	91.84	100	0	0	94.12
C4-dicarboxylate transporter	fig|6666666.157468.peg.1714	100	100	100	100	100	100	98.94	96.4	98.94	98.94	0	0	98.94	0	97.3	0	98.94	100	99.12	0	0	100
C4-dicarboxylate transporter	fig|6666666.157468.peg.1715	100	100	100	98.36	98.36	98.36	96.72	96.72	96.72	96.72	95.08	95.08	96.72	0	95.08	92.11	96.72	96.72	96.72	0	0	89.77
C4-dicarboxylate transporter	fig|6666666.157468.peg.1716	100	98	100	100	100	98	98.18	98.18	96	98.18	100	100	98.18	0	100	0	98.18	100	100	0	89.29	76.49
2-oxoglutarate/malate translocator	fig|6666666.157468.peg.1717	100	100	100	98.63	98.63	98.63	98.61	98.61	98.61	98.61	97.22	97.22	98.61	0	87.32	100	98.61	94.37	92.96	0	80.65	95.58
tRNA-specific 2-thiouridylase MnmA	fig|6666666.157468.peg.1718	100	100	100	99.7	99.7	99.7	99.7	99.7	99.7	99.7	99.11	99.11	99.41	99.7	99.41	99.7	99.7	99.7	99.7	99.7	98.52	0
Flagellar motor switch protein FliN	fig|6666666.157468.peg.1725	100	100	100	99.29	99.29	99.29	100	100	100	100	99.29	99.29	100	99.64	99.64	98.93	100	99.64	99.29	99.63	97.14	92.74
Flagellar motor switch protein FliM	fig|6666666.157468.peg.1726	100	100	100	100	100	100	100	100	100	100	99.72	99.72	100	100	100	100	100	100	100	100	99.44	80
RNA polymerase sigma factor for flagellar operon	fig|6666666.157468.peg.1727	100	100	100	99.57	99.57	99.57	100	100	100	100	100	100	100	100	100	100	100	100	100	100	99.13	89.83
Motility integral membrane protein	fig|6666666.157468.peg.1728	100	100	100	100	100	100	100	100	100	100	100	100	100	100	99.15	99.15	100	100	100	100	97.46	81.82
Flagellar synthesis regulator FleN	fig|6666666.157468.peg.1729	100	100	100	100	100	100	100	100	100	100	100	100	100	100	100	99.65	100	100	99.65	100	95.49	100
Flagellar biosynthesis protein FlhF	fig|6666666.157468.peg.1730	100	100	100	99.79	99.79	99.79	100	100	100	100	100	100	100	100	99.59	99.38	100	100	99.59	99.38	95.84	100
2-amino-4-hydroxy-6-hydroxymethyldihydropteridine pyrophosphokinase (EC 2.7.6.3)	fig|6666666.157468.peg.1731	100	100	100	99.36	99.36	99.36	100	100	100	100	100	100	100	100	100	100	100	100	100	100	96.82	89.92
3-dehydroquinate dehydratase II (EC 4.2.1.10)	fig|6666666.157468.peg.1732	100	100	100	100	100	100	100	100	100	100	100	100	100	100	100	100	100	100	100	100	99.37	84.44
BOX elements	fig|6666666.157468.peg.1733	100	100	100	99.51	99.51	99.51	98.78	98.78	98.78	98.78	98.78	98.78	98.78	98.78	98.29	97.07	98.78	98.78	98.29	100	95.59	75.6
protease IV (PspA)	fig|6666666.157468.peg.1734	100	100	100	99.66	99.66	99.66	99.66	99.66	99.66	99.66	99.66	99.66	99.66	99.66	99.33	99.66	99.66	99.66	99.66	99.66	96.98	100
Hemerythrin-like iron-binding protein	fig|6666666.157468.peg.1737	100	100	100	100	100	100	100	100	100	100	100	100	100	58.73	100	96.97	100	100	100	57.14	96.15	84.94
Hemerythrin-like iron-binding protein	fig|6666666.157468.peg.1738	100	100	100	100	100	100	100	100	100	100	100	100	100	71.15	100	89.58	100	100	100	71.15	68.75	36.62
Hemerythrin-like iron-binding protein	fig|6666666.157468.peg.1739	100	100	100	100	100	100	100	100	100	100	100	100	100	53.95	100	93.67	100	100	100	53.95	88	80.27
L-lactate permease	fig|6666666.157468.peg.1743	100	100	100	99.82	99.82	99.82	99.82	99.82	99.82	99.82	99.82	99.82	99.82	99.82	99.82	99.11	99.82	99.82	99.82	99.82	97.5	66.87
Cytolethal distending toxin subunit C	fig|6666666.157468.peg.1744	100	100	100	99.47	99.47	99.47	99.47	99.47	99.47	99.47	99.47	99.47	99.47	99.47	99.47	99.47	99.47	99.47	98.94	99.47	0	97.46
Cytolethal distending toxin subunit B	fig|6666666.157468.peg.1745	100	100	100	100	100	100	100	100	100	100	100	100	100	100	100	100	100	100	100	99.62	0	89.66
Cytolethal distending toxin subunit A	fig|6666666.157468.peg.1746	100	100	100	99.25	99.25	99.25	99.25	99.25	99.25	99.25	99.25	99.25	99.25	99.25	99.25	99.63	99.25	99.25	99.63	99.63	70.51	94.28
Arginine/ornithine antiporter ArcD	fig|6666666.157468.peg.1747	100	100	100	98.7	98.7	98.7	100	100	100	100	100	100	100	100	100	100	100	100	100	100	98.7	89.8
Cytochrome d ubiquinol oxidase subunit I (EC 1.10.3.-)	fig|6666666.157468.peg.1748	100	100	100	99.62	99.62	99.62	99.81	99.81	99.81	99.81	100	100	99.81	99.81	100	99.42	99.81	99.81	99.81	100	98.08	0
Cytochrome d ubiquinol oxidase subunit II (EC 1.10.3.-)	fig|6666666.157468.peg.1749	100	100	100	98.4	98.4	98.4	98.4	98.4	98.4	98.4	98.13	98.13	98.4	98.4	98.4	98.66	98.4	98.4	98.13	100	99.47	73.68
Aspartate racemase (EC 5.1.1.13)	fig|6666666.157468.peg.1750	100	100	100	98.7	98.7	98.7	98.7	98.7	98.7	98.7	98.7	98.7	98.7	98.7	97.84	96.52	98.7	98.7	97.84	99.57	96.97	98.43
Uracil-DNA glycosylase, family 1	fig|6666666.157468.peg.1751	100	100	100	100	100	100	99.57	99.57	99.57	99.57	99.57	99.57	99.57	99.57	99.13	99.13	99.57	99.57	99.13	100	96.97	85.48
Aspartate ammonia-lyase (EC 4.3.1.1)	fig|6666666.157468.peg.1752	100	100	100	99.15	99.15	99.15	99.57	99.57	99.57	99.57	99.57	99.57	99.57	99.57	99.15	99.15	99.36	99.57	99.15	99.57	98.72	83.43
Anaerobic C4-dicarboxylate membrane transporter DcuA	fig|6666666.157468.peg.1753	100	100	100	99.1	99.1	99.1	98.65	98.65	98.65	98.65	98.65	98.65	98.65	98.65	99.33	99.1	98.65	98.65	99.33	98.87	98.65	94.19
LSU ribosomal protein L21p	fig|6666666.157468.peg.1759	100	100	100	98.04	98.04	98.04	98.04	98.04	98.04	98.04	98.04	98.04	98.04	98.04	98.04	98.04	98.04	98.04	98.04	98.04	97.06	86.81
LSU ribosomal protein L27p	fig|6666666.157468.peg.1760	100	100	100	100	100	100	100	100	100	100	100	100	100	100	100	100	100	100	100	100	100	90.82
GTP-binding protein Obg	fig|6666666.157468.peg.1761	100	100	100	98.26	98.26	98.26	98.55	98.55	98.55	98.55	98.55	98.55	98.55	98.55	98.26	98.84	98.55	98.55	98.26	99.13	97.1	93.47
Glutamate 5-kinase (EC 2.7.2.11)	fig|6666666.157468.peg.1762	100	100	100	99.6	99.6	99.6	100	100	100	100	100	100	100	100	100	99.2	100	100	100	99.6	100	27.46
Methionyl-tRNA formyltransferase (EC 2.1.2.9)	fig|6666666.157468.peg.1763	100	100	100	98.36	98.36	98.36	99.67	99.67	99.67	99.67	99.67	99.67	99.67	99.67	98.69	98.69	99.67	99.67	98.69	100	99.02	57.66
Biotin--protein ligase (EC 6.3.4.9, EC 6.3.4.10, EC 6.3.4.11, EC 6.3.4.15)	fig|6666666.157468.peg.1764	100	100	100	97.24	97.24	97.24	99.53	100	100	99.53	98.58	98.58	99.53	100	97.24	97.7	100	99.54	97.24	98.62	98.16	84.84
ATP synthase F0 sector subunit b' (EC 3.6.3.14)	fig|6666666.157468.peg.1767	100	100	100	96.45	96.45	96.45	99.29	99.29	99.29	99.29	97.16	97.16	99.29	99.29	100	99.29	99.29	99.29	100	96.45	99.29	86
ATP synthase F0 sector subunit b	fig|6666666.157468.peg.1768	100	100	100	98.24	98.24	98.24	99.41	99.41	99.41	99.41	98.24	98.24	99.41	99.41	99.41	99.41	99.41	99.41	99.41	98.24	97.65	67
ATP synthase delta chain (EC 3.6.3.14)	fig|6666666.157468.peg.1769	100	100	100	100	100	100	100	100	100	100	99.42	99.42	100	100	100	99.42	100	100	100	100	97.69	96.87
ATP synthase alpha chain (EC 3.6.3.14)	fig|6666666.157468.peg.1770	100	100	100	98.4	98.4	98.4	98.4	98.4	98.4	98.4	98.4	98.4	98.4	98.4	98.6	98.2	98.4	98.4	98.6	98.4	97.8	84.68
ATP synthase gamma chain (EC 3.6.3.14)	fig|6666666.157468.peg.1771	100	100	100	98.98	98.98	98.98	98.98	98.98	98.98	98.98	99.32	99.32	98.98	98.98	99.32	98.98	98.98	98.98	100	99.32	98.3	86.36
ATP synthase beta chain (EC 3.6.3.14)	fig|6666666.157468.peg.1772	100	100	100	100	100	100	100	100	100	100	100	100	100	100	100	100	100	100	100	100	98.92	0
ATP synthase epsilon chain (EC 3.6.3.14)	fig|6666666.157468.peg.1773	100	100	100	99.22	99.22	99.22	100	100	100	100	97.67	97.67	100	100	100	100	100	100	100	100	93.8	82.55
MotA/TolQ/ExbB proton channel family protein	fig|6666666.157468.peg.1774	100	100	100	98.91	98.91	98.91	100	100	100	100	99.46	99.46	100	100	99.46	100	100	99.46	100	98.91	100	94.91
Biopolymer transport protein ExbD/TolR	fig|6666666.157468.peg.1775	100	100	100	98.45	98.45	98.45	98.45	98.45	98.45	98.45	99.22	99.22	98.45	98.45	99.22	100	98.45	97.67	100	99.22	98.45	81.79
tolB protein precursor, periplasmic protein involved in the tonb-independent uptake of group A colicins	fig|6666666.157468.peg.1777	100	100	100	100	100	100	99.5	99.5	99.5	99.5	99.25	99.25	99.5	99.5	99	99.5	99.5	100	99.4	99.5	99.25	32.8
Outer membrane lipoprotein omp16 precursor	fig|6666666.157468.peg.1778	100	100	100	99.39	99.39	99.39	99.39	99.39	99.39	99.39	100	100	99.39	99.39	99.39	99.39	99.39	99.39	99.39	99.39	98.18	98.73
FKBP-type peptidyl-prolyl cis-trans isomerase SlyD (EC 5.2.1.8)	fig|6666666.157468.peg.1780	100	100	100	99.47	99.47	99.47	100	100	100	100	100	100	100	100	100	100	100	100	99.47	99.47	98.7	96.94
Malonyl CoA-acyl carrier protein transacylase (EC 2.3.1.39)	fig|6666666.157468.peg.1781	100	100	100	99.31	99.31	99.31	99.67	99.67	99.67	99.67	99.67	99.67	99.35	99.67	98.37	99.02	99.67	99.67	99.67	99.02	96.41	75
Menaquinone via 6-amino-6-deoxyfutalosine step 2	fig|6666666.157468.peg.1782	100	100	100	100	100	100	100	100	100	100	100	100	100	100	99.56	100	100	100	100	100	99.12	80.54
tRNA(Cytosine32)-2-thiocytidine synthetase	fig|6666666.157468.peg.1783	100	100	100	98.41	98.41	98.41	100	100	100	100	99.6	99.6	100	100	98.8	98.41	100	100	99.6	99.6	96.02	90.22
Nicotinamidase (EC 3.5.1.19)	fig|6666666.157468.peg.1784	100	100	100	99.42	99.42	99.42	100	100	100	100	100	100	100	100	98.27	100	100	100	100	100	98.27	79.14
Metal-dependent hydrolase YbeY, involved in rRNA and/or ribosome maturation and assembly	fig|6666666.157468.peg.1786	100	100	100	98.52	98.52	98.52	98.52	98.52	98.52	98.52	98.52	98.52	98.52	98.52	96.99	98.52	98.52	98.52	97.74	98.52	97.76	78.91
tRNA dihydrouridine synthase B (EC 1.-.-.-)	fig|6666666.157468.peg.1789	100	100	100	96.43	96.43	96.43	96.43	96.43	96.43	96.43	96.75	96.75	99.68	96.43	95.41	98.05	96.43	96.43	95.08	96.75	97.08	99.14
C4-type zinc finger protein, DksA/TraR family	fig|6666666.157468.peg.1791	100	100	100	99.17	99.17	99.17	99.17	99.17	99.17	99.17	99.17	99.17	99.17	99.17	99.17	99.17	99.17	99.17	96.67	98.33	98.33	78.1
LSU m3Psi1915 methyltransferase RlmH	fig|6666666.157468.peg.1792	100	100	100	99.33	99.33	99.33	99.33	99.33	99.33	99.33	99.33	99.33	99.33	98.66	97.99	99.33	99.33	99.33	98.66	97.99	95.97	74.3
Acetyl-coenzyme A carboxyl transferase beta chain (EC 6.4.1.2)	fig|6666666.157468.peg.1793	100	100	100	99.29	99.29	99.29	99.29	99.29	99.29	99.29	99.64	99.64	99.29	99.29	99.29	99.64	99.29	99.29	100	99.29	98.21	0
Outer membrane protein assembly factor YaeT precursor	fig|6666666.157468.peg.1795	100	100	100	99.47	99.47	99.47	99.47	99.47	99.47	99.46	99.47	99.47	99.47	99.46	99.59	99.05	99.46	99.46	98.65	99.46	97.83	0
Prephenate and/or arogenate dehydrogenase (unknown specificity) (EC 1.3.1.12)(EC 1.3.1.43)	fig|6666666.157468.peg.1796	100	100	100	100	100	100	100	100	100	100	99.64	99.64	100	99.64	99.27	98.91	100	100	98.91	99.64	98.55	88.54
Peptidase, M23/M37 family	fig|6666666.157468.peg.1797	100	100	100	100	100	100	100	100	100	100	99.78	99.78	100	100	98.91	99.34	100	99.78	98.47	99.78	97.81	0
UDP-3-O-[3-hydroxymyristoyl] N-acetylglucosamine deacetylase (EC 3.5.1.108)	fig|6666666.157468.peg.1798	100	100	100	100	100	100	100	100	100	100	99.66	99.66	100	99.66	98.64	99.32	100	100	99.32	99.66	99.32	91.49
TsaB protein, required for threonylcarbamoyladenosine (t(6)A) formation in tRNA	fig|6666666.157468.peg.1799	100	100	100	98.5	98.5	98.5	99.25	99.25	99.25	99.25	99.25	99.25	99.25	99.25	98.5	99.25	99.25	99.25	99.25	99.25	99.25	97.68
Homoserine kinase (EC 2.7.1.39)	fig|6666666.157468.peg.1800	100	100	100	99.66	99.66	99.66	99.66	99.66	99.66	99.66	99.66	99.66	99.66	100	99.66	98.97	99.66	99.66	99.32	99.66	98.63	0
Translation initiation factor 2	fig|6666666.157468.peg.1802	100	100	100	99.54	99.54	99.54	99.31	99.31	99.31	99.31	97.14	97.26	99.31	99.77	99.54	97.7	99.2	99.66	98.85	99.66	96.33	77.93
Ribosome-binding factor A	fig|6666666.157468.peg.1803	100	100	100	100	100	100	100	100	100	100	100	100	100	100	99.17	100	100	100	100	100	99.17	100
FIG000325: clustered with transcription termination protein NusA	fig|6666666.157468.peg.1804	100	100	100	97.14	97.14	97.14	82.99	82.99	82.99	82.99	95.71	95.71	82.99	97.14	99.29	97.86	82.99	97.14	98.57	97.14	97.14	71.21
Zinc ABC transporter, inner membrane permease protein ZnuB	fig|6666666.157468.peg.1807	100	100	100	98.5	98.5	98.5	100	100	100	100	98.13	98.13	100	97	100	98.5	100	98.5	100	98.13	98.13	0
Zinc ABC transporter, ATP-binding protein ZnuC	fig|6666666.157468.peg.1808	100	100	100	98.94	98.94	98.94	100	100	100	100	99.65	99.65	100	98.94	98.94	99.3	100	98.59	100	98.94	98.59	93.2
Zinc ABC transporter, periplasmic-binding protein ZnuA	fig|6666666.157468.peg.1809	100	100	100	98.31	98.31	98.31	100	100	100	100	100	100	100	98.65	100	98.99	100	98.31	99.32	98.31	91.55	0
Phosphonate ABC transporter phosphate-binding periplasmic component (TC 3.A.1.9.1)	fig|6666666.157468.peg.1812	100	0	100	0	0	0	98.25	98.25	98.25	98.25	98.25	98.25	0	0	0	98.25	0	98.25	0	98.25	0	0
Small hydrophobic protein Cj0260c-related protein	fig|6666666.157468.peg.1815	100	100	100	100	100	100	96.55	96.55	96.55	96.55	100	100	96.55	96.55	100	98.63	96.55	98.63	100	0	98.39	63.21
Dihydroorotase (EC 3.5.2.3)	fig|6666666.157468.peg.1816	100	100	100	98.51	98.51	98.51	98.51	98.51	98.51	98.51	98.51	98.51	98.51	98.51	97.91	96.42	98.51	98.51	98.51	78.38	96.42	0
Diacylglycerol kinase (EC 2.7.1.107)	fig|6666666.157468.peg.1818	100	100	100	94.92	94.92	94.92	92.37	92.37	92.37	92.37	94.07	94.07	92.37	93.22	94.07	97.46	92.37	93.22	94.07	92.37	94.92	29.07
Arginine/ornithine antiporter ArcD	fig|6666666.157468.peg.1819	100	100	100	98.1	98.1	98.1	97.62	97.62	97.62	97.62	97.86	97.86	97.62	97.66	98.24	99.41	97.66	97.66	98.24	97.66	93.36	64.72
Exodeoxyribonuclease III (EC 3.1.11.2)	fig|6666666.157468.peg.1820	100	100	100	98.81	98.81	98.81	99.6	99.6	99.6	99.6	99.6	99.6	99.6	99.6	99.21	98.41	99.6	99.6	98.81	99.6	96.83	30.54
Molybdenum cofactor biosynthesis protein MoaC	fig|6666666.157468.peg.1823	100	100	100	97.45	97.45	97.45	95.54	95.54	95.54	95.54	95.54	95.54	95.54	95.54	97.45	96.82	95.54	95.54	98.09	98.09	97.44	64.83
Highly acidic protein	fig|6666666.157468.peg.1824	100	100	100	98	98	98	98	96.08	98	98	98	98	98	98	96	98	98	98	96.55	100	96.55	72.34
L-Proline/Glycine betaine transporter ProP	fig|6666666.157468.peg.1825	100	100	100	98.62	98.62	98.62	99.16	99.16	99.16	99.16	99.08	99.08	99.08	99.08	98.39	97.94	99.08	99.08	98.62	99.31	97.71	77.9
LSU ribosomal protein L20p	fig|6666666.157468.peg.1830	100	100	100	100	100	100	100	100	100	100	100	100	100	100	100	100	100	100	100	100	97.09	61
LSU ribosomal protein L35p	fig|6666666.157468.peg.1831	100	100	100	100	100	100	98.41	98.41	98.41	98.41	98.41	98.41	98.41	98.41	100	100	98.41	98.41	100	100	98.41	62.48
Hemerythrin-like iron-binding protein	fig|6666666.157468.peg.1833	100	100	100	100	100	100	97.74	97.74	97.74	97.74	97.74	97.74	97.74	97.74	96.99	100	97.74	97.74	97.74	30.89	93.85	0
Cysteine desulfurase (EC 2.8.1.7)	fig|6666666.157468.peg.1834	100	100	100	99.24	99.24	99.24	99.49	99.49	99.49	99.49	99.49	99.49	99.49	99.49	98.98	97.91	99.49	99.48	98.95	98.47	98.17	0
Iron-sulfur cluster assembly scaffold protein IscU/NifU-like	fig|6666666.157468.peg.1835	100	100	100	100	100	100	100	100	100	100	99.69	99.69	100	100	100	99.69	100	99.69	99.69	100	99.69	81.42
Small-conductance mechanosensitive channel	fig|6666666.157468.peg.1836	100	100	100	100	100	100	99.52	99.52	99.52	99.52	98.25	98.25	99.52	99.52	98.72	99.84	99.52	99.36	99.36	100	97.77	48.57
Carbonic anhydrase (EC 4.2.1.1)	fig|6666666.157468.peg.1837	100	100	100	100	100	100	99.53	99.53	99.53	99.53	99.53	99.53	99.53	99.53	99.53	100	99.53	99.53	99.53	100	99.53	47.3
Arginine/ornithine antiporter ArcD	fig|6666666.157468.peg.1838	100	100	100	99.13	99.13	99.13	99.57	99.57	99.57	99.57	99.13	99.13	99.57	99.57	99.57	99.57	99.57	99.57	99.57	99.57	98.27	0
Preprotein translocase subunit SecG (TC 3.A.5.1.1)	fig|6666666.157468.peg.1839	100	100	100	98.37	98.37	98.37	98.37	98.37	98.37	98.37	97.56	97.56	98.37	98.37	98.37	99.19	98.37	98.37	98.37	99.19	94.31	55.22
Ribosome recycling factor	fig|6666666.157468.peg.1840	100	100	100	98.92	98.92	98.92	97.3	97.3	97.3	97.3	98.38	98.38	97.3	97.3	97.84	97.84	97.3	97.3	98.92	97.84	97.3	51.81
Orotate phosphoribosyltransferase (EC 2.4.2.10)	fig|6666666.157468.peg.1841	100	100	100	98.02	98.02	98.02	98.02	98.02	98.02	98.02	98.02	98.02	98.02	98.02	98.02	98.51	98.02	98.02	100	97.52	96.04	65.79
FIG00732228: membrane protein	fig|6666666.157468.peg.1842	100	100	100	97.79	97.79	97.79	99.26	99.26	99.26	99.26	99.26	99.26	99.26	99.26	97.79	97.79	99.26	99.26	97.79	97.79	98.53	0
Ribonucleotide reductase of class Ia (aerobic), beta subunit (EC 1.17.4.1)	fig|6666666.157468.peg.1843	100	100	100	99.12	99.12	99.12	100	100	100	100	100	100	100	100	100	100	100	100	100	99.12	99.41	0
Nicotinate phosphoribosyltransferase (EC 2.4.2.11)	fig|6666666.157468.peg.1844	100	100	100	99.34	99.34	99.34	99.78	99.78	99.78	99.78	98.68	98.68	99.78	99.78	99.34	98.9	99.78	99.78	99.56	99.12	98.03	21.43
carbonic anhydrase, family 3	fig|6666666.157468.peg.1845	100	100	100	98.9	98.9	98.9	98.35	98.35	98.35	98.35	97.8	97.8	98.9	98.9	98.9	98.53	98.9	98.9	98.9	97.8	97.25	32.46
Protein-L-isoaspartate O-methyltransferase (EC 2.1.1.77)	fig|6666666.157468.peg.1846	100	100	100	100	100	100	100	100	100	100	99.52	99.52	100	100	100	99.04	100	100	100	100	98.09	0
Acetylornithine aminotransferase (EC 2.6.1.11) / N-succinyl-L,L-diaminopimelate aminotransferase (EC 2.6.1.17)	fig|6666666.157468.peg.1847	100	100	100	98.98	98.98	98.98	98.47	98.47	98.47	98.47	98.47	98.47	98.47	98.47	97.96	98.98	98.47	98.47	97.71	98.47	98.22	39.45
Acetylglutamate kinase (EC 2.7.2.8)	fig|6666666.157468.peg.1848	100	100	100	99.28	99.28	99.28	98.57	98.57	98.57	97.85	97.85	97.85	98.57	98.57	98.21	97.85	98.57	98.57	98.21	98.57	98.57	100
N-acetyl-gamma-glutamyl-phosphate reductase (EC 1.2.1.38)	fig|6666666.157468.peg.1850	100	100	100	97.66	97.66	97.66	98.83	98.83	98.83	97.37	98.54	98.54	98.83	98.83	99.42	97.66	98.83	98.83	99.71	99.71	96.78	59.52
serine protease pet	fig|6666666.157468.peg.1851	100	100	100	95	95	95	97.67	97.67	97.67	97.67	97.67	97.67	97.67	0	100	95.35	97.67	97.67	100	0	95.35	25
serine protease pet	fig|6666666.157468.peg.1852	100	100	100	100	100	100	100	100	100	100	100	100	100	0	97.5	92.5	100	100	97.5	0	0	0
serine protease pet	fig|6666666.157468.peg.1853	100	100	100	98.33	98.33	98.33	100	100	100	100	100	100	100	0	0	92.68	100	100	0	100	96.49	25.37
pathogenicity domain protein	fig|6666666.157468.peg.1854	100	100	100	98.51	98.51	98.51	98.51	98.51	98.51	98.51	98.51	98.51	98.51	0	98	84.62	98.51	98.51	98	98.51	0	98.65
Glycerate kinase (EC 2.7.1.31)	fig|6666666.157468.peg.1855	100	100	100	0	0	0	98.77	98.77	98.77	98.77	98.77	98.77	98.77	0	95.06	93.24	98.77	98.77	95.06	98.08	0	31.4
Glycerate kinase (EC 2.7.1.31)	fig|6666666.157468.peg.1856	100	100	100	93.33	93.33	93.33	86.67	86.67	86.67	86.67	86.67	86.67	86.67	0	84.31	98.04	86.67	86.67	84.31	86.67	0	39.53
DNA modification methylase (Adenine-specific methyltransferase) (EC 2.1.1.72)	fig|6666666.157468.peg.1860	100	100	100	88.98	88.98	88.98	99.72	99.72	99.72	99.72	99.72	99.72	99.72	99.72	99.45	99.45	99.72	98.62	99.72	89.81	98.07	24.57
Translation initiation factor 3	fig|6666666.157468.peg.1861	100	100	100	100	100	100	100	100	100	100	100	100	100	100	100	100	100	100	99.42	100	99.42	98.8
Threonyl-tRNA synthetase (EC 6.1.1.3)	fig|6666666.157468.peg.1862	100	100	100	99.5	99.5	99.5	99.67	99.67	99.67	99.67	99.67	99.67	99.67	99.67	99.17	99.67	99.67	99.5	99.67	99.67	98.5	30.25
Undecaprenyl-diphosphatase (EC 3.6.1.27)	fig|6666666.157468.peg.1863	100	100	100	97.75	97.75	97.75	98.88	98.88	98.88	98.88	98.88	98.88	98.88	98.88	98.88	98.88	98.88	98.88	98.88	98.88	97	26.84
oligopeptide transporter	fig|6666666.157468.peg.1864	100	100	100	99.85	99.85	99.85	99.25	99.25	99.25	99.25	99.4	99.4	99.25	99.4	99.4	99.85	99.25	99.25	99.25	99.4	98.64	82.63
Magnesium citrate secondary transporter	fig|6666666.157468.peg.1865	100	100	100	99.55	99.55	99.55	99.78	99.78	99.78	99.78	99.55	99.55	99.78	99.78	100	97.99	99.78	99.78	99.78	0	96.24	38.21
membrane protein	fig|6666666.157468.peg.1867	100	100	100	99.47	99.47	99.47	99.5	99.5	99.5	99.5	99.5	99.5	99.5	99.5	98.95	97.42	99.5	99	99.5	98.95	0	21.95
Helicase-like protein	fig|6666666.157468.peg.1870	100	100	100	98.98	98.98	98.98	99.75	99.75	99.75	99.75	99.75	99.75	99.75	99.75	100	98.98	99.75	99.75	99.75	99.24	99.24	23.14
4-hydroxy-tetrahydrodipicolinate reductase (EC 1.17.1.8)	fig|6666666.157468.peg.1871	100	100	100	99.17	99.17	99.17	100	100	100	100	100	100	100	100	100	98.76	100	100	100	99.17	97.5	36.21
Amidophosphoribosyltransferase (EC 2.4.2.14)	fig|6666666.157468.peg.1872	100	100	100	100	100	100	100	100	100	98.96	100	100	100	100	100	99.55	100	100	99.78	99.78	99.55	29.53
Flagellum-specific ATP synthase FliI	fig|6666666.157468.peg.1873	100	100	100	99.78	99.78	99.78	100	100	100	100	100	100	100	100	99.57	99.57	100	100	99.78	99.78	98.92	0
GTP cyclohydrolase I (EC 3.5.4.16) type 1	fig|6666666.157468.peg.1874	100	100	100	98.42	98.42	98.42	100	100	100	100	100	100	100	100	99.47	99.47	100	100	100	97.89	98.42	0
Cell division trigger factor (EC 5.2.1.8)	fig|6666666.157468.peg.1875	100	100	100	100	100	100	100	100	100	100	100	100	100	100	98.42	98.87	100	100	99.77	100	98.2	94.66
ATP-dependent Clp protease proteolytic subunit (EC 3.4.21.92)	fig|6666666.157468.peg.1876	100	100	100	100	100	100	100	100	100	100	100	100	100	100	99.48	100	100	100	100	100	100	96.68
Peptide deformylase (EC 3.5.1.88)	fig|6666666.157468.peg.1877	100	100	100	100	100	100	100	100	100	100	100	100	100	100	99.43	98.86	100	100	100	100	100	76.28
Peptide deformylase (EC 3.5.1.88)	fig|6666666.157468.peg.1878	100	100	100	98.8	98.8	98.8	99.2	99.2	99.2	99.2	99.2	99.2	99.2	99.2	99	99	99.2	99.2	98.6	99.6	98	0
Maebl	fig|6666666.157468.peg.1879	100	100	100	100	100	100	100	100	100	100	100	100	100	100	100	100	100	100	99.57	99.57	99.14	29.15
NAD(P)HX epimerase / NAD(P)HX dehydratase	fig|6666666.157468.peg.1880	100	100	100	100	100	100	100	100	100	100	100	100	100	100	98.9	98.9	100	100	99.12	99.56	96.49	98.96
Phosphoribosylglycinamide formyltransferase (EC 2.1.2.2)	fig|6666666.157468.peg.1881	100	100	100	99.47	99.47	99.47	99.47	99.47	99.47	99.47	99.47	99.47	99.47	96.81	97.87	97.34	99.47	99.47	96.81	100	95.21	72.47
Integral membrane protein TerC	fig|6666666.157468.peg.1882	100	100	100	100	100	100	100	100	100	100	100	100	100	99.58	100	100	100	100	99.16	99.16	97.91	100
Alkylphosphonate utilization operon protein PhnA	fig|6666666.157468.peg.1883	100	100	100	97.1	97.1	97.1	98.55	98.55	98.55	98.55	98.55	98.55	98.55	95.65	95.65	94.2	98.55	98.55	95.65	98.55	94.2	0
Magnesium and cobalt efflux protein CorC	fig|6666666.157468.peg.1885	100	100	100	100	100	100	99.56	99.56	99.56	99.56	99.56	99.56	99.56	99.77	99.34	99.34	99.56	99.56	99.56	99.53	98.6	0
Transmembrane transport protein	fig|6666666.157468.peg.1886	100	100	100	99.5	99.5	99.5	99.75	99.75	99.75	99.75	99.25	99.25	99.75	99.75	99	99	99.75	99.75	99.75	99.5	99.25	0
Ferric siderophore transport system, periplasmic binding protein TonB	fig|6666666.157468.peg.1887	100	100	100	98.39	98.39	98.39	97.98	97.98	97.98	97.98	98.39	98.39	97.98	97.98	0	98.79	97.98	97.98	98.39	98.79	0	96.05
Ferric siderophore transport system, biopolymer transport protein ExbD	fig|6666666.157468.peg.1888	100	100	100	100	100	100	100	100	100	100	100	100	100	100	34.65	99.26	100	100	100	100	34.65	81.56
Ferric siderophore transport system, biopolymer transport protein ExbB	fig|6666666.157468.peg.1889	100	100	100	97.23	97.23	97.23	96.84	96.84	96.84	96.84	96.84	96.84	96.84	96.84	44.16	97.63	96.84	96.44	96.84	98.02	44.16	97.03
Ferric iron ABC transporter, iron-binding protein	fig|6666666.157468.peg.1893	100	100	100	98.8	98.8	98.8	98.5	98.5	98.5	98.5	98.5	98.5	98.5	98.5	98.8	98.8	98.5	98.2	98.5	98.8	94.91	100
Ferric iron ABC transporter, permease protein	fig|6666666.157468.peg.1894	100	100	100	99.07	99.07	99.07	99.07	99.07	99.07	99.07	99.07	99.07	98.88	99.07	98.7	98.88	99.07	99.07	99.07	99.07	98.88	100
Carboxynorspermidine dehydrogenase	fig|6666666.157468.peg.1896	100	100	100	99	99	99	99	99	99	99	99	99	99	99	98	99.75	99	99	98.75	99	97.26	49.27
Superoxide dismutase [Fe] (EC 1.15.1.1)	fig|6666666.157468.peg.1897	100	100	100	99.55	99.55	99.55	99.09	99.09	99.09	99.09	99.55	99.55	99.09	99.55	99.55	98.64	99.09	99.55	99.55	99.55	95.91	95.71
Arginine/ornithine antiporter ArcD	fig|6666666.157468.peg.1899	100	100	100	98.93	98.93	98.93	99.47	99.47	99.47	99.47	99.47	99.47	99.47	99.47	99.47	99.47	99.47	99.47	98.93	99.47	97.86	0
tRNA dimethylallyltransferase (EC 2.5.1.75)	fig|6666666.157468.peg.1900	100	100	100	99.31	99.31	99.31	99.31	99.31	99.31	99.31	99.31	99.31	99.31	99.31	98.27	98.27	99.31	99.31	98.96	99.31	97.92	0
Menaquinone via futalosine polyprenyltransferase (MenA homolog)	fig|6666666.157468.peg.1901	100	100	100	100	100	100	99.66	99.66	99.66	99.66	99.66	99.66	99.66	99.66	97.96	97.96	99.66	99.66	98.98	100	97.62	0
Molybdenum cofactor biosynthesis protein MoaA	fig|6666666.157468.peg.1904	100	100	100	100	100	100	100	100	100	100	100	100	100	100	100	100	100	100	100	99.66	99.32	0
Queuosine Biosynthesis QueE Radical SAM	fig|6666666.157468.peg.1905	100	100	100	100	100	100	99.19	99.19	99.19	99.19	98.79	98.79	99.19	99.19	99.6	99.19	99.19	99.19	99.6	98.79	97.57	0
6-carboxytetrahydropterin synthase (EC 4.1.2.50) @ Queuosine biosynthesis QueD, PTPS-I	fig|6666666.157468.peg.1906	100	100	100	100	100	100	99.48	99.48	99.48	99.48	99.48	99.48	99.48	99.48	98.96	98.96	99.48	100	98.96	99.48	98.96	0
Ribosomal RNA small subunit methyltransferase E (EC 2.1.1.-)	fig|6666666.157468.peg.1908	100	100	100	100	100	100	100	100	100	100	100	100	100	100	0	100	100	100	100	100	97.04	0
Ribosomal RNA small subunit methyltransferase E (EC 2.1.1.-)	fig|6666666.157468.peg.1909	100	100	100	100	100	100	100	100	100	100	100	100	100	100	99.08	99.08	100	100	99.08	100	95.41	0
LSU ribosomal protein L31p @ LSU ribosomal protein L31p, zinc-dependent	fig|6666666.157468.peg.1910	100	100	100	100	100	100	100	100	100	100	100	100	100	100	100	100	100	100	100	100	98.46	0
rRNA small subunit methyltransferase I	fig|6666666.157468.peg.1911	100	100	100	100	100	100	99.64	99.64	99.64	99.64	100	100	99.64	99.64	99.64	100	99.64	99.64	99.64	100	96.72	80.65
23S rRNA (guanosine-2'-O-) -methyltransferase rlmB (EC 2.1.1.-)	fig|6666666.157468.peg.1912	100	100	100	99.12	99.12	99.12	99.56	99.56	99.56	99.56	98.68	98.68	99.56	99.56	100	98.68	99.56	99.56	100	98.68	99.12	0
Arginine/ornithine antiporter ArcD	fig|6666666.157468.peg.1913	100	100	100	99.04	99.04	99.04	99.36	99.36	99.36	99.36	98.72	98.72	99.36	99.36	99.04	97.76	99.36	99.36	99.04	98.72	97.12	0
Aspartate aminotransferase (EC 2.6.1.1)	fig|6666666.157468.peg.1915	100	100	100	99.75	99.75	99.75	99.25	99.25	99.25	99.5	99.75	99.75	99.25	99.25	99.5	99.75	99.25	99.25	99.5	99.25	98.75	0
Homoserine dehydrogenase (EC 1.1.1.3)	fig|6666666.157468.peg.1916	100	100	100	99.52	99.52	99.52	99.04	99.04	99.04	99.04	99.04	99.04	99.04	99.04	99.04	99.52	99.04	99.04	99.28	99.04	98.31	0
Thioredoxin	fig|6666666.157468.peg.1918	100	100	100	100	100	100	99.04	99.04	99.04	99.04	100	100	99.04	99.04	100	100	99.04	99.04	100	100	98.08	98.84
Thioredoxin reductase (EC 1.8.1.9)	fig|6666666.157468.peg.1919	100	100	100	100	100	100	100	100	100	100	100	100	100	100	98.08	99.04	100	100	98.08	98.08	97.44	0
LSU ribosomal protein L33p	fig|6666666.157468.peg.1921	100	88	88	88	88	88	88	88	88	88	88	88	88	88	88	88	88	88	88	88	88	0
Translation elongation factor Tu	fig|6666666.157468.peg.1922	100	86.36	86.36	86.36	86.36	86.36	86.36	86.36	86.36	86.36	86.36	86.36	86.36	86.36	86.36	86.36	86.36	86.36	86.36	86.36	86.36	0
Carboxynorspermidine dehydrogenase	fig|6666666.157468.peg.1923	100	70.21	70.21	70.21	70.21	70.21	70.21	70.21	70.21	70.21	70.21	70.21	70.21	70.21	70.21	70.21	70.21	70.21	70.21	70.21	72.34	70.69
HD domain protein	fig|6666666.157468.peg.1932	100	100	100	0	0	0	0	0	0	0	0	0	0	0	0	0	0	0	0	0	95.01	99.2
CRISPR-associated protein, Csn1 family	fig|6666666.157468.peg.1939	100	100	100	43.62	43.62	43.62	43.92	43.92	43.92	44.47	43.92	43.92	43.39	43.62	0	43.54	43.88	43.52	43.62	0	43.82	89.29
DNA/RNA non-specific endonuclease	fig|6666666.157468.peg.1952	100	100	100	66.51	66.51	66.51	65.57	69.59	65.57	65.57	66.04	66.04	66.04	66.04	65.57	66.51	66.04	66.04	65.57	93.46	84.44	0
transcriptional regulator, XRE family	fig|6666666.157468.peg.1972	100	100	100	0	0	0	0	0	0	0	0	0	0	0	0	0	0	0	0	0	97.83	0
B. PUTATIVE/POSSIBLE/PREDICTED/CONSERVED/UNCHARACTERIZED/UNKNOWN (212)
putative protein	fig|6666666.157468.peg.65	100	100	100	0	0	0	100	100	100	100	100	100	100	0	0	0	0	0	0	0	0	0
predicted membrane-associated	fig|6666666.157468.peg.150	100	100	100	0	0	98.91	0	0	0	0	0	0	0	0	0	0	0	0	0	90.85	0	90.49
predicted membrane-associated	fig|6666666.157468.peg.151	100	100	100	0	0	0	0	0	0	0	0	0	0	0	0	0	0	0	0	98.91	0	99.21
Domain of unknown function (DUF332) superfamily	fig|6666666.157468.peg.154	100	100	100	0	0	0	0	0	0	0	0	0	0	0	0	0	0	0	0	98.92	100	51.69
Uncharacterized protein ImpH/VasB	fig|6666666.157468.peg.167	100	100	100	0	0	0	0	0	0	0	0	0	0	0	0	0	0	0	0	0	0	99.27
Uncharacterized protein ImpH/VasB	fig|6666666.157468.peg.168	100	100	100	0	0	0	0	0	0	0	0	0	0	0	0	0	0	0	0	0	0	100
predicted secreted protein	fig|6666666.157468.peg.181	100	100	100	0	0	0	0	0	0	0	0	0	0	0	0	0	0	0	0	0	0	0
putative cytochrome C-type biogenesis protein	fig|6666666.157468.peg.194	100	100	100	99.35	99.35	99.35	99.44	99.44	99.44	99.25	99.26	99.26	99.35	99.35	99.26	99.26	99.35	99.35	99.26	99.26	97.65	78.73
putative cytochrome C	fig|6666666.157468.peg.201	100	100	100	99.31	100	100	99.31	99.31	99.31	99.31	100	100	100	100	99.31	99.31	100	100	99.31	100	99.31	85.82
putative lipoprotein required for motility	fig|6666666.157468.peg.207	100	100	100	98.25	98.25	98.25	98.25	98.25	98.25	98.25	98.25	98.25	98.83	98.83	98.83	98.83	98.83	98.83	98.83	100	98.25	86.13
possible purine/pyrimidine phosphoribosyltransferase	fig|6666666.157468.peg.209	100	100	100	97.91	97.91	97.91	98.86	98.86	98.86	98.86	100	100	98.95	98.95	100	100	98.95	98.95	98.95	100	97.91	72.77
probable outer membrane component of multidrug efflux pump	fig|6666666.157468.peg.212	100	100	100	97.41	97.41	97.41	98.11	98.11	98.11	98.11	99.06	99.06	99.06	99.06	98.35	99.06	99.06	99.06	98.35	0	92.48	97.88
possible dnaJ-like protein	fig|6666666.157468.peg.215	100	100	100	100	100	100	99.25	99.25	99.25	99.25	99.63	99.63	99.25	100	100	99.63	99.25	100	100	99.63	98.88	98.88
putative transmembrane transport protein	fig|6666666.157468.peg.221	100	100	100	98.71	98.71	98.71	98.97	98.97	98.97	98.97	100	100	98.71	98.71	99.09	99.09	98.71	100	97.48	99.22	83.52	79.02
putative periplasmic ATP/GTP-binding protein	fig|6666666.157468.peg.222	100	100	100	99.29	99.29	99.29	99.29	99.29	99.29	99.29	100	100	99.29	99.29	98.94	99.29	99.29	100	98.94	100	0	84.04
Type I restriction-modification system, DNA-methyltransferase subunit M (EC 2.1.1.72) / Type I restriction-modification system, specificity subunit S (EC 3.1.21.3)	fig|6666666.157468.peg.236	100	100	100	88.64	88.64	88.64	84.95	84.95	85.45	72.6	84.57	84.57	86.21	86.21	31.58	99.06	84.95	99.13	31.58	84.75	25.95	84.66
predicted amidohydrolase	fig|6666666.157468.peg.240	100	100	100	99.22	99.22	99.22	99.22	99.22	99.22	99.22	99.22	99.22	99.22	98.84	98.84	98.84	99.22	99.22	99.22	100	96.51	84.94
possible acetyltransferase	fig|6666666.157468.peg.246	100	100	100	100	100	100	100	100	100	100	100	100	100	100	100	100	100	97.87	97.87	100	79.14	100
putative lipoprotein	fig|6666666.157468.peg.256	100	100	100	99.53	99.53	99.53	99.53	99.53	99.53	99.53	99.53	99.53	99.53	99.53	99.53	99.53	99.53	99.53	99.53	99.07	99.07	89.3
probable periplasmic protein Cj1079	fig|6666666.157468.peg.261	100	100	100	98.44	98.44	98.44	97.66	97.66	97.66	93.81	98.44	98.44	98.44	97.66	97.66	98.44	98.44	97.37	98.44	97.66	99.22	58.14
putative ATP/GTP-binding protein	fig|6666666.157468.peg.266	100	100	100	100	100	100	98.42	98.42	98.42	98.42	100	100	100	100	98.02	100	100	100	98.02	100	97.23	80.63
Protein of unknown function, DUF583 superfamily	fig|6666666.157468.peg.268	100	100	100	100	100	100	100	100	100	100	100	100	100	100	98.95	98.95	100	100	98.95	100	97.89	78.95
probable lipoprotein Cj1090c	fig|6666666.157468.peg.272	100	100	100	100	100	100	99.41	99.41	99.41	99.41	100	100	100	100	100	98.82	100	100	99.41	98.82	98.24	82.94
possible periplasmic thioredoxin	fig|6666666.157468.peg.288	100	100	100	98.5	98.5	98.5	98.5	98.5	98.5	98.5	98.5	98.5	98.5	98.5	98	98.5	98.5	98.5	98	98.5	97.5	84.24
putative MCP-type signal transduction protein	fig|6666666.157468.peg.292	100	100	100	99.07	99.07	99.07	99.07	99.07	99.07	99.07	99.07	99.07	99.07	98.83	99.3	98.83	99.07	98.83	99.3	99.07	98.37	50.83
COG2833: uncharacterized protein	fig|6666666.157468.peg.295	100	100	100	98.11	98.11	98.11	98.49	98.49	98.49	98.49	98.49	98.49	98.49	96.6	96.98	96.98	98.49	98.49	96.98	98.87	96.23	77.36
putative two-domain glycosyltransferase	fig|6666666.157468.peg.317	100	100	100	38.37	38.37	38.37	88.16	88.16	88.16	98.75	86.02	86.02	86.02	86.02	89.51	98.75	86.02	98.75	98.75	100	75	73.79
putative integral membrane protein (dedA homolog)	fig|6666666.157468.peg.342	100	100	100	97.5	97.5	97.5	99.5	99.5	99.5	99.5	99	99	99.5	99	98	98	99.5	99	97.5	95.98	87.72	89.45
putative periplasmic protein	fig|6666666.157468.peg.343	100	100	100	100	100	100	100	100	100	100	100	100	100	100	100	100	100	100	100	100	62.34	0
putative ABC transporter ATP binding protein	fig|6666666.157468.peg.354	100	100	100	98.1	98.1	98.1	98.1	98.1	98.1	98.1	98.1	98.1	98.1	98.58	98.1	97.63	98.1	98.1	98.1	100	97.16	88.15
putative C4-dicarboxylate transport protein	fig|6666666.157468.peg.366	100	100	100	100	100	100	99.13	99.13	99.13	99.13	99.78	99.78	99.78	100	99.13	99.56	100	100	99.13	99.77	98.91	94.29
probable low-affinity inorganic phosphate transporter	fig|6666666.157468.peg.368	100	100	100	100	100	100	100	100	100	99.8	100	100	99.61	99.8	99.8	99.61	100	100	99.61	99.8	98.03	91.73
2-Oxobutyrate oxidase, putative	fig|6666666.157468.peg.373	100	100	100	98.79	98.79	98.79	100	100	100	100	99.39	99.39	100	100	98.79	99.09	100	98.79	97.27	98.79	86.67	85.45
putative lipoprotein thioredoxin	fig|6666666.157468.peg.381	100	100	100	98.92	98.92	98.92	98.92	98.92	98.92	98.92	99.46	99.46	98.92	98.92	100	97.84	98.92	98.92	99.46	100	98.38	72.43
COG1496: Uncharacterized conserved protein	fig|6666666.157468.peg.390	100	100	100	100	100	100	100	100	100	100	100	100	100	100	96.9	94.25	100	100	93.81	97.79	94.25	82.22
putative two-component sensor	fig|6666666.157468.peg.399	100	100	100	100	100	100	100	100	100	100	100	100	100	100	100	99.76	100	100	100	100	98.8	92.07
putative two-component regulator	fig|6666666.157468.peg.400	100	100	100	100	100	100	100	100	100	100	100	100	100	100	100	99.11	100	100	99.55	100	99.55	99.55
predicted phosphatase	fig|6666666.157468.peg.406	100	100	100	100	100	100	100	100	100	100	100	100	100	100	98.06	98.06	100	100	98.06	99.51	97.09	87.86
COG1565: Uncharacterized conserved protein	fig|6666666.157468.peg.409	100	100	100	98.42	98.42	98.42	96.84	96.84	96.84	96.84	96.84	96.84	96.84	96.52	94.94	97.78	96.84	96.84	94.62	98.73	94.62	80.32
possible phosphatase	fig|6666666.157468.peg.410	100	100	100	99.07	99.07	99.07	98.46	98.46	98.46	98.46	98.15	98.15	98.46	99.38	96.91	99.38	98.46	98.46	96.91	99.07	95.37	61.13
putative transmembrane transport protein	fig|6666666.157468.peg.414	100	100	100	98.25	98.25	98.25	99.75	99.75	99.75	99.75	99.75	99.75	99.75	99.75	97.74	100	99.75	99.75	97.74	99.75	97.49	25.29
putative Fe-S oxidoreductase	fig|6666666.157468.peg.417	100	100	100	98.33	98.33	98.33	99.67	99.67	99.67	99.67	99.67	99.67	99.67	99.67	98.67	100	99.67	99.67	98.67	100	97.33	83
putative fibronectin domain-containing lipoprotein	fig|6666666.157468.peg.452	100	100	100	98.25	98.25	98.25	98	98	98	98	97.76	98	97.76	98	98	97.51	98	97.97	99	98.75	94.01	78.05
putative two-domain glycosyltransferase	fig|6666666.157468.peg.470	100	41.04	41.04	99.29	99.29	99.29	41.79	41.79	99.29	0	43.28	43.28	43.28	43.28	41.79	43.28	43.28	43.28	43.28	41.04	36.24	40.3
putative cytochrome C-type haem-binding periplasmic protein	fig|6666666.157468.peg.471	100	98.46	0	100	100	100	100	100	100	100	100	100	100	100	100	100	100	100	100	0	96.3	86.15
putative hemolysin activation/secretion protein	fig|6666666.157468.peg.476	100	100	100	98.1	98.1	98.1	100	100	100	100	100	100	100	34.86	93.33	94.29	100	95.24	93.33	100	0	36.19
putative hemolysin activation/secretion protein	fig|6666666.157468.peg.477	100	100	100	98.72	98.72	98.72	96.36	96.36	96.36	96.36	96.36	96.36	96.36	58.11	92.21	92.21	95.12	93.75	92.21	98.75	0	40.79
putative periplasmic protein	fig|6666666.157468.peg.494	100	100	100	99.77	99.77	99.77	99.09	99.09	99.09	99.09	100	100	99.09	99.09	99.77	99.09	99.09	99.09	99.21	99.77	0	99.32
putative integral membrane zinc-metalloprotease	fig|6666666.157468.peg.499	100	100	100	98.23	98.23	98.23	98.48	98.48	98.48	98.48	98.23	98.23	97.97	98.48	98.23	97.97	98.48	98.73	98.23	98.73	96.96	91.9
predicted protease from collagenase family	fig|6666666.157468.peg.521	100	100	100	98.08	98.08	98.08	98.08	98.08	98.08	98.08	98.08	98.08	98.08	98.08	98.8	99.04	98.08	98.08	99.04	100	98.08	88.73
Possible restriction /modification enzyme	fig|6666666.157468.peg.532	100	100	100	95.8	95.8	95.8	95.1	95.1	95.1	95.1	95.1	95.1	95.1	95.8	95.1	0	95.1	95.1	0	95.8	93.71	0
Possible restriction /modification enzyme	fig|6666666.157468.peg.533	100	100	100	98.57	98.57	98.57	98.35	98.35	98.35	98.35	98.49	98.49	98.35	98.68	94.84	25.2	98.35	98.49	27.47	95.83	99.22	27.73
possible sugar transferase	fig|6666666.157468.peg.539	100	100	100	92.94	92.94	92.94	89.41	89.41	89.41	89.41	94.12	94.12	89.41	94.12	95.29	97.67	89.41	94.12	89.41	94.12	46.34	0
possible sugar transferase	fig|6666666.157468.peg.540	100	100	100	96	97.71	96.94	94.66	92.86	92.86	94.66	95.92	95.92	92.86	96.95	96.95	100	92.86	95.77	92	95.45	0	0
capsular polysaccharide biosynthesis protein, putative	fig|6666666.157468.peg.541	100	100	100	99	98.67	99	95.33	93	93	95.33	100	100	93	97.41	98.67	100	93	98.48	93	99.33	39.18	0
putative transmembrane protein	fig|6666666.157468.peg.567	100	100	100	98.91	98.91	98.91	99.18	99.18	99.18	98.67	99.18	99.18	98.37	98.09	99.18	98.86	98.91	98.91	97.97	97.02	95.64	37.78
putative deoxyribonuclease YcfH	fig|6666666.157468.peg.581	100	100	100	99.26	99.26	99.26	98.89	98.89	98.89	98.89	98.52	98.52	98.52	98.52	98.89	99.63	98.52	99.63	98.89	99.63	96.68	80
putative two-component response regulator	fig|6666666.157468.peg.582	100	100	100	99.28	99.28	99.28	99.76	99.76	99.76	35.19	99.52	99.52	99.28	99.28	99.76	99.76	99.28	99.76	99.76	99.76	98.79	78.99
putative Holliday junction resolvase YggF	fig|6666666.157468.peg.590	100	100	100	97.64	97.64	97.64	100	100	100	100	98.43	98.43	98.43	99.21	99.21	96.06	98.43	99.21	100	99.21	95.24	87.4
Family of unknown function (DUF450) family	fig|6666666.157468.peg.596	100	100	100	99.71	99.71	99.71	100	100	100	100	100	100	100	0	100	100	0	0	100	0	0	0
Predicted metal-dependent hydrolase	fig|6666666.157468.peg.604	100	100	100	99.07	99.07	99.07	98.14	98.14	98.14	98.14	94.88	94.88	94.88	97.21	96.28	99.07	97.21	100	94.88	95.81	93.49	92.56
probable poly(beta-D-mannuronate) O-acetylase (EC 2.3.1.-)	fig|6666666.157468.peg.613	100	100	100	99.13	99.13	99.13	99.78	99.78	99.78	99.78	98.91	98.91	98.91	100	100	98.47	98.91	98.69	98.47	98.69	96.72	89.3
possible periplasmic protein	fig|6666666.157468.peg.615	100	100	100	98.47	98.47	98.47	97.7	97.7	97.7	97.7	98.72	98.72	98.72	98.72	98.21	97.45	98.72	98.47	97.7	98.72	98.21	76.53
Uncharacterized protein conserved in bacteria	fig|6666666.157468.peg.623	100	100	100	99.1	99.1	99.1	98.65	98.65	98.65	98.65	98.65	98.65	98.65	98.65	96.85	96.4	98.65	99.1	96.85	99.1	0	68.47
putative sodium-dependent transmembrane transport protein	fig|6666666.157468.peg.624	100	100	100	100	100	100	100	100	100	100	100	100	100	100	100	100	100	100	100	100	98.88	84.79
pyridoxal phosphate-dependent deaminase, putative	fig|6666666.157468.peg.625	100	100	100	99.66	99.66	99.66	100	100	100	100	100	100	100	100	99.31	99.31	100	100	99.31	100	96.91	74.47
putative transcriptional regulator	fig|6666666.157468.peg.654	100	100	100	97.59	97.59	97.59	97.93	97.93	97.93	97.93	97.59	97.59	97.59	97.59	96.67	97.24	97.59	97.59	97.24	96.9	0	66.9
possible periplasmic protein	fig|6666666.157468.peg.663	100	100	100	97.47	97.47	97.47	100	100	100	100	97.1	97.1	97.73	97.73	98.38	97.1	98.06	97.73	97.73	98.38	0	77.35
putative integral membrane protein	fig|6666666.157468.peg.668	100	100	100	99.45	99.45	99.45	99.45	99.45	99.45	99.45	99.7	99.7	99.7	99.45	98.89	98.89	99.7	99.17	98.61	99.72	94.94	59.33
possible flagellar protein	fig|6666666.157468.peg.678	100	100	100	96.69	96.69	96.69	99.17	99.11	99.11	99.11	99.17	99.17	97.52	99.17	99.17	96.69	97.52	99.11	99.17	99.17	94.21	99.17
putative integral memnbrane protein	fig|6666666.157468.peg.681	100	100	100	99.22	99.22	99.22	98.45	98.45	98.45	98.45	98.45	98.45	98.45	98.45	100	100	98.45	98.45	100	100	93.02	66.1
2-oxoglutarate oxidoreductase, delta subunit, putative (EC 1.2.7.3)	fig|6666666.157468.peg.690	100	100	100	100	100	100	99.03	99.03	99.03	99.03	99.03	99.03	99.03	99.03	100	100	99.03	99.03	100	100	100	97.09
predicted dehydrogenases and related proteins	fig|6666666.157468.peg.718	100	100	100	99.31	99.31	99.31	100	100	100	100	100	100	99.65	99.65	98.61	98.61	99.65	99.65	98.61	100	98.61	0
predicted metal-dependent hydrolase of the TIM-barrel fold	fig|6666666.157468.peg.733	100	100	100	90.41	0	0	94.92	94.92	94.92	94.92	87.06	87.06	90.2	87.06	0	0	87.06	87.06	0	87.06	89.41	83.86
putative lyase (EC 4.2.1.52)	fig|6666666.157468.peg.739	100	100	100	100	26.4	26.4	99.67	99.67	99.67	99.67	99.67	99.67	99.67	99.67	26.52	26.07	99.67	99.67	26.07	99.67	97.35	94.7
putative transcriptional regulator	fig|6666666.157468.peg.754	100	100	100	97.47	97.47	97.47	96.97	96.97	96.97	96.97	96.97	96.97	96.97	96.97	97.98	98.48	96.97	96.97	97.98	98.99	95.45	72.78
Protein of unknown function DUF374	fig|6666666.157468.peg.763	100	100	100	99.41	100	100	100	100	100	100	100	100	100	99.48	97.41	98.45	100	100	98.45	99.48	88.08	74.87
putative membrane protein	fig|6666666.157468.peg.765	100	100	100	99.43	99.43	99.43	99.43	99.43	99.43	99.43	99.43	99.43	99.43	99.12	98.86	97.71	99.43	99.43	97.71	99.43	98.29	71.18
putative succinate dehydrogenase cytochrome b subunit	fig|6666666.157468.peg.779	100	100	100	99.65	99.65	99.65	100	100	100	100	100	100	100	100	98.95	100	100	100	98.95	98.95	97.08	0
putative membrane protein	fig|6666666.157468.peg.787	100	0	0	0	0	0	0	0	0	0	0	0	0	0	0	0	0	0	0	65.96	0	97.86
possible lipoprotein	fig|6666666.157468.peg.794	100	0	87.13	90.1	90.1	90.1	93.07	93.07	93.07	93.07	90.1	90.1	93.07	90.1	0	0	100	88.12	0	0	0	0
possible periplasmic protein	fig|6666666.157468.peg.819	100	100	100	99.26	99.26	99.26	98.89	98.89	98.89	98.89	98.89	98.89	98.89	98.52	98.52	99.63	98.89	99.26	98.89	98.89	97.79	74.54
putative acyl carrier protein	fig|6666666.157468.peg.828	100	100	100	86.76	86.76	86.76	86.76	86.76	86.76	86.76	86.76	86.76	86.76	86.76	75	88.24	86.76	86.76	86.76	100	88.24	98.61
putative acyl carrier protein	fig|6666666.157468.peg.835	100	100	100	97.26	97.26	97.26	100	100	100	100	98.63	98.63	98.63	98.63	97.26	98.63	98.63	98.63	95.89	98.63	97.26	100
putative amino acid activating enzyme (EC 6.3.2.-)	fig|6666666.157468.peg.837	100	100	100	97.41	97.41	97.41	97.81	97.81	97.81	97.81	97.61	97.61	97.81	97.81	84.29	84.1	97.81	97.81	97.61	96.61	97.4	97.41
putative acyl carrier protein	fig|6666666.157468.peg.841	100	100	100	98.67	98.67	98.67	98.67	98.67	98.67	98.67	98.67	98.67	98.67	98.67	93.06	93.06	98.67	98.67	98.67	83.78	98.67	98.67
putative coiled-coil protein	fig|6666666.157468.peg.875	100	100	100	100	100	100	100	100	100	100	100	100	100	100	99.11	100	100	100	99.11	100	87.5	96.43
putative secreted serine protease (EC 3.4.21.-)	fig|6666666.157468.peg.894	100	100	100	99.9	99.9	99.9	99.9	99.9	99.9	99.9	99.9	99.9	99.81	99.9	99.9	40.84	99.9	99.9	100	99.71	0	0
putative periplasmic protein (vacJ homolog)	fig|6666666.157468.peg.900	100	100	100	96.98	96.98	96.98	96.12	96.12	96.12	96.12	96.12	96.12	96.12	96.12	96.55	96.12	96.12	96.12	99.57	98.28	94.81	87.07
putative efflux protein	fig|6666666.157468.peg.904	100	100	100	99.54	99.54	99.54	98.38	98.38	98.38	98.38	99.3	99.3	99.54	99.54	98.38	99.54	99.54	99.54	99.77	97.91	97.22	88.86
predicted hydrolase of the alpha/beta superfamily	fig|6666666.157468.peg.905	100	100	100	99.63	99.63	99.63	0	0	0	0	100	100	100	100	0	99.63	100	100	100	0	0	54.07
MmgE/PrpD family protein, putative	fig|6666666.157468.peg.921	100	100	100	97.98	97.98	97.98	97.98	97.98	97.98	97.98	97.84	97.84	97.84	0	97.98	97.98	97.84	97.44	97.98	94.17	90.02	97.31
Ferrous iron transport protein A, putative	fig|6666666.157468.peg.922	100	100	100	98.65	98.65	98.65	100	100	100	100	100	100	100	100	97.3	100	100	100	100	100	94.59	100
probable integral membrane protein Cj1412c	fig|6666666.157468.peg.937	100	100	100	98.93	98.93	98.93	98.39	98.39	98.39	98.39	99.46	99.46	98.66	99.46	100	97.32	99.46	99.46	97.32	98.93	96.51	82.31
Conserved domain protein	fig|6666666.157468.peg.940	100	100	100	0	0	0	0	0	0	0	0	0	0	0	0	0	0	0	0	0	0	0
putative ATP/GTP-binding protein	fig|6666666.157468.peg.963	100	100	100	97.33	97.33	97.33	99.47	99.47	99.47	99.47	99.47	99.47	99.47	99.47	97.33	99.47	99.47	99.47	100	97.33	95.19	91.44
probable integral membrane protein Cj1452	fig|6666666.157468.peg.965	100	100	100	99.16	99.16	99.16	99.16	99.16	99.16	99.16	99.16	99.16	99.16	99.58	99.58	99.16	99.16	99.58	97.47	99.16	94.94	78.06
putative membrane protein YfcA	fig|6666666.157468.peg.981	100	100	100	98.82	98.82	98.82	99.21	99.21	99.21	99.21	98.82	98.82	98.82	98.82	99.61	99.61	98.82	98.82	99.21	99.21	99.21	90.74
putative two-component response regulator	fig|6666666.157468.peg.1002	100	100	100	100	100	100	95.58	95.58	95.58	95.58	100	100	100	100	95.58	95.13	100	100	95.58	99.56	94.69	88.18
putative two-component sensor histidine kinase	fig|6666666.157468.peg.1003	100	100	100	99.5	99.5	99.5	99.75	99.75	99.75	99.75	100	100	100	100	99.75	99.75	100	100	99.53	100	100	67.41
Heavy-metal-associated domain (N-terminus) and membrane-bounded cytochrome biogenesis cycZ-like domain, possible membrane copper tolerance protein	fig|6666666.157468.peg.1004	100	100	100	99.54	99.54	99.54	99.09	99.09	99.09	99.09	99.54	99.54	99.54	99.54	99.09	98.63	99.54	99.54	99.09	99.09	97.26	75.23
putative formate dehydrogenase, cytochrome B subunit (EC 1.2.1.2)	fig|6666666.157468.peg.1020	100	100	100	99.68	99.68	99.68	100	100	100	100	98.06	98.06	98.06	98.06	98.06	99.68	98.06	98.06	99.68	100	97.74	94.52
Formate dehydrogenase-O, iron-sulfur subunit (EC 1.2.1.2); putative formate dehydrogenase iron-sulfur subunit (EC 1.2.1.2)	fig|6666666.157468.peg.1021	100	100	100	100	100	100	99.53	99.53	99.53	99.53	100	100	100	100	100	99.53	100	100	100	99.53	99.53	93.9
putative formate dehydrogenase-specific chaperone	fig|6666666.157468.peg.1026	100	100	100	99.57	99.57	99.57	100	100	100	100	100	100	100	0	99.58	100	100	100	99.57	100	98.28	75.11
Carboxynorspermidine decarboxylase, putative (EC 4.1.1.-)	fig|6666666.157468.peg.1027	100	100	100	98.69	98.69	98.69	98.17	98.17	98.17	98.17	98.43	98.43	98.43	98.43	97.91	98.43	98.43	98.69	98.69	99.21	97.91	85.6
C4-dicarboxylate anaerobic carrier, putative	fig|6666666.157468.peg.1035	100	100	100	98.67	98.67	98.67	98.31	98.31	98.31	98.31	87.1	87.1	92.28	0	27.92	92.65	96.61	98.31	99.11	75.44	98.94	90.44
C4-dicarboxylate anaerobic carrier, putative	fig|6666666.157468.peg.1036	100	100	100	87.88	87.88	87.88	89.39	89.39	89.39	89.39	87.88	87.88	89.39	0	0	89.39	89.39	89.39	89.39	0	0	89.39
possible periplasmic protein	fig|6666666.157468.peg.1042	100	100	100	97.94	97.94	97.94	97.12	97.12	97.12	97.12	97.94	97.94	97.94	97.94	98.35	100	97.94	97.94	98.77	100	97.95	82.85
putative helix-turn-helix containsing protein	fig|6666666.157468.peg.1043	100	100	100	99.13	99.13	99.13	99.71	99.71	99.71	99.71	98.84	98.84	98.84	98.84	99.42	99.13	98.84	98.84	99.13	99.71	97.39	80.58
possible bacterioferritin	fig|6666666.157468.peg.1044	100	100	100	100	100	100	100	100	100	100	100	100	100	100	100	100	100	100	100	100	98.6	87.92
transporter, putative	fig|6666666.157468.peg.1069	100	100	100	98.47	98.47	98.47	25	23.9	25	25	25	25	25	25	24.67	98.72	25	25	98.72	100	23.96	58.61
putative membrane protein	fig|6666666.157468.peg.1072	100	100	100	0	0	0	100	100	100	100	100	100	100	100	0	0	100	100	0	100	0	87.5
putative transcriptional regulator	fig|6666666.157468.peg.1075	100	100	100	99.3	99.3	99.3	100	100	100	100	100	100	100	99.3	99.3	99.3	100	99.3	99.3	0	0	97.14
probable periplasmic protein Cj0776c	fig|6666666.157468.peg.1106	100	100	100	98.53	98.53	98.53	97.06	97.06	97.06	97.06	97.06	97.06	97.06	97.06	98.53	97.06	97.06	97.06	97.06	100	88.2	57.18
putative zinc protease	fig|6666666.157468.peg.1135	100	100	100	99.04	99.04	99.04	99.28	99.28	99.28	99.28	99.28	99.28	99.28	99.28	98.56	99.76	99.28	99.28	99.76	98.56	97.12	81.6
predicted permease YjgP/YjgQ family	fig|6666666.157468.peg.1153	100	100	100	99.41	99.41	99.41	99.41	99.41	99.41	98.77	99.41	99.41	99.71	99.41	99.71	99.71	99.41	99.41	99.71	99.71	98.24	82.99
Ankyrin repeat-containing possible periplasmic protein	fig|6666666.157468.peg.1161	100	100	100	98.49	98.49	98.49	98.49	98.49	98.49	98.49	98.49	98.49	98.49	98.3	96.12	96.23	98.49	98.24	95.98	99.03	95.23	74.82
predicted phosphohydrolase	fig|6666666.157468.peg.1172	100	100	100	98.4	98.4	98.4	98.93	98.93	98.93	98.93	98.93	98.93	98.93	99.47	96.79	98.4	98.93	98.93	96.79	100	95.45	78.07
probable integral membrane protein Cj0851c	fig|6666666.157468.peg.1177	100	100	100	98.2	98.2	98.2	97.01	97.01	97.01	97.01	97.01	97.01	98.8	98.8	96.41	98.2	97.01	97.01	97.01	98.2	97.6	59.88
putative arylsulfate sulfotransferase (EC 2.8.2.22)	fig|6666666.157468.peg.1192	100	100	100	86.75	86.75	86.75	98.72	98.72	98.72	98.72	100	100	98.72	0	85.54	85.54	98.72	98.72	85.54	0	97.5	0
putative arylsulfate sulfotransferase (EC 2.8.2.22)	fig|6666666.157468.peg.1193	100	100	100	0	0	0	100	100	100	100	100	100	100	0	0	0	100	100	0	0	0	0
putative amino acid ABC tansporter permease protein	fig|6666666.157468.peg.1221	100	100	100	99.19	99.19	99.19	99.6	99.6	99.6	99.6	99.6	99.6	99.6	99.6	99.19	99.19	99.6	99.6	99.6	99.19	98.79	89.88
putative glutamine transport ATP-binding protein	fig|6666666.157468.peg.1222	100	100	100	99.59	99.59	99.59	100	100	100	100	100	100	100	100	98.76	98.76	100	99.59	98.76	99.59	99.17	84.71
putative amino-acid transport protein	fig|6666666.157468.peg.1223	100	100	100	98.98	98.98	98.98	99.39	99.39	99.39	99.39	99.39	99.39	99.39	99.39	98.98	98.98	99.39	99.39	98.98	99.8	98.43	86.54
Cytochrome oxidase biogenesis protein Sco1/SenC/PrrC, putative copper metallochaperone	fig|6666666.157468.peg.1231	100	100	100	100	100	100	99.46	99.46	99.46	99.46	99.46	99.46	99.46	99.46	99.46	100	99.46	99.46	99.46	100	98.39	59.68
putative ABC-type amino-acid transporter permease protein	fig|6666666.157468.peg.1239	100	100	100	99.54	99.54	99.54	100	100	100	100	100	100	100	100	100	100	100	100	100	100	99.54	89.95
putative ABC-type amino-acid transporter permease protein	fig|6666666.157468.peg.1240	100	100	100	99.6	99.6	99.6	99.2	99.2	99.2	98	99.6	99.6	99.2	99.6	99.6	99.6	99.2	99.6	99.6	99.6	98	88
putative transmembrane transport protein	fig|6666666.157468.peg.1254	100	100	100	98.88	98.88	98.88	98.43	98.43	98.43	98.43	98.43	98.43	98.43	98.43	99.33	99.33	98.43	98.43	99.1	100	97.76	80.72
putative transmembrane transport protein	fig|6666666.157468.peg.1255	100	100	100	99.1	99.1	99.1	99.77	99.77	99.77	99.77	99.77	99.77	99.77	99.77	98.42	98.42	99.77	99.55	98.42	99.77	98.2	83.37
putative 2-acylglycerophosphoethanolamine acyltransferase / acyl-acyl carrier protein synthetase (EC 6.2.1.20)	fig|6666666.157468.peg.1258	100	100	100	97.95	97.95	97.95	99.57	99.57	99.57	99.57	99.57	99.57	99.57	99.57	97.69	97.26	99.57	99.57	99.5	99.66	23.66	81.59
putative glutamine transport system permease	fig|6666666.157468.peg.1260	100	100	100	98.47	98.47	98.47	98.85	98.85	98.85	98.85	98.85	98.85	98.85	98.85	99.62	99.62	98.85	98.85	99.62	98.47	97.32	68.97
putative helicase	fig|6666666.157468.peg.1265	100	100	100	99.55	99.55	99.55	99.55	99.55	99.55	99.12	99.55	99.55	99.55	99.55	100	98.64	99.55	99.55	99.55	100	97.29	76.29
methyl-accepting chemotaxis protein (tlpB), putative	fig|6666666.157468.peg.1271	100	100	100	0	0	0	100	100	100	100	0	0	100	100	0	0	100	100	0	97.44	100	0
methyl-accepting chemotaxis protein (tlpB), putative	fig|6666666.157468.peg.1272	100	100	100	92.66	92.66	92.66	93.22	93.22	93.22	93.22	92.66	92.66	93.22	93.22	92.66	92.66	93.22	93.22	92.66	98.31	39.29	64.41
methyl-accepting chemotaxis protein (tlpB), putative	fig|6666666.157468.peg.1273	100	100	100	0	0	0	0	0	0	93.1	0	0	0	0	0	0	0	0	0	0	0	0
methyl-accepting chemotaxis protein (tlpB), putative	fig|6666666.157468.peg.1274	100	100	100	96.58	96.58	96.58	96.58	96.58	96.58	96.58	96.58	96.58	96.58	94.52	96.58	96.58	96.58	96.58	96.58	0	96.67	74.66
putative hemolysin activation/secretion protein	fig|6666666.157468.peg.1295	100	100	100	97.7	97.7	97.7	96.89	96.89	96.89	52	97.28	97.28	96.89	97.28	94.14	94.7	96.89	97.28	93.72	55.41	0	39.31
putative hemolysin activation/secretion protein	fig|6666666.157468.peg.1296	100	100	100	99.36	99.36	99.36	98.39	98.39	98.39	98.71	98.07	98.07	98.39	98.07	88.46	93.89	98.39	98.39	88.78	50.59	0	57.58
putative amino-acid transporter periplasmic solute-binding protein	fig|6666666.157468.peg.1303	100	100	100	99.28	99.28	99.28	99.64	99.64	99.64	99.64	100	100	99.64	99.64	98.92	100	99.64	99.64	99.28	99.64	98.92	89.25
putative integral membrane protein	fig|6666666.157468.peg.1307	100	100	100	98.53	98.53	98.53	98.39	98.39	98.39	98.39	98.39	98.39	98.39	98.39	99.27	99.27	98.39	98.39	99.27	94.7	88.82	0
putative membrane protein	fig|6666666.157468.peg.1309	100	100	100	100	100	100	100	100	100	100	100	100	100	100	0	100	100	100	100	100	68.25	69.84
Uncharacterized protein Cj0990c	fig|6666666.157468.peg.1310	100	100	100	98.02	98.02	98.02	98.41	98.41	98.41	98.41	98.84	98.84	98.41	98.41	97.62	98.02	98.41	98.28	98.02	98.81	0	48.8
putative oxidoreductase ferredoxin-type protein, clusters with CPO	fig|6666666.157468.peg.1311	100	100	100	99.29	99.29	99.29	99.29	99.29	99.29	29.1	99.52	99.52	99.52	99.52	99.05	100	99.52	99.52	99.05	99.52	99.05	89.31
putative membrane protein YeiH	fig|6666666.157468.peg.1319	100	100	100	99.73	99.73	99.73	99.73	99.73	99.73	99.73	99.73	99.73	99.73	99.73	99.18	98.9	99.73	99.73	99.18	99.73	93.02	86.11
putative transcriptional regulator (lysR family)	fig|6666666.157468.peg.1320	100	100	100	100	100	100	99.66	99.66	99.66	99.66	99.66	99.66	99.66	99.66	100	98.98	99.66	99.66	100	100	74.51	80.14
phosphohistidine phosphatase SixA, putative	fig|6666666.157468.peg.1322	100	100	100	100	100	100	100	100	100	100	100	100	100	100	97.65	97.65	100	100	97.65	99.41	95.88	70.24
putative transmembrane symporter	fig|6666666.157468.peg.1339	100	100	100	98.48	98.48	98.48	98.26	98.26	98.26	98.26	98.26	98.26	98.26	98.7	98.26	98.48	98.05	98.92	97.83	98.26	97.18	85.68
putative ATP /GTP binding protein	fig|6666666.157468.peg.1347	100	100	100	99.61	99.61	99.61	99.8	99.8	99.8	99.8	99.61	99.61	100	99.8	99.8	99.41	99.61	99.8	99.61	99.61	97.05	92.72
putative molybdenum containing oxidoreductase	fig|6666666.157468.peg.1359	100	100	100	98.3	98.3	98.3	99.51	99.51	99.51	99.51	98.3	98.3	98.3	98.3	98.3	98.06	98.3	98.3	98.3	98.3	0	0
putative periplasmic protein	fig|6666666.157468.peg.1360	100	100	100	98.23	98.23	98.23	99.12	99.12	99.12	99.12	100	100	100	100	98.23	98.23	100	100	99.12	100	0	0
possible outer membrane protein	fig|6666666.157468.peg.1368	100	100	100	99.07	99.07	99.07	65.42	65.42	98.85	65.42	33.07	0	65.42	65.42	99.07	98.85	65.42	65.42	0	99.07	0	65.89
putative acetyltransferase	fig|6666666.157468.peg.1374	100	100	100	99.43	99.43	99.43	98.86	98.86	98.86	98.86	98.3	98.3	98.86	98.86	98.3	97.73	98.86	98.86	99.43	98.86	96.59	75.57
putative efflux protein	fig|6666666.157468.peg.1402	100	100	100	99.29	99.29	99.29	99.18	99.18	99.18	99.18	99.29	99.29	98.36	99.29	98.35	98.11	98.77	99.29	98.35	99.53	98.35	88.07
NA+/H+ antiporter (napA), putative	fig|6666666.157468.peg.1405	100	100	100	98.21	98.21	98.21	98.47	98.47	98.47	98.47	98.47	98.47	99.74	98.47	99.23	98.47	98.47	98.72	98.47	99.49	97.95	89
possible lipoprotein thiredoxin	fig|6666666.157468.peg.1419	100	100	100	100	100	100	100	100	100	98.2	99.4	99.4	98.24	100	99.4	99.4	100	100	100	99.4	97.6	84.34
possible periplasmic thiredoxin	fig|6666666.157468.peg.1420	100	100	100	100	100	100	100	100	100	100	99.38	99.38	100	100	99.38	100	100	100	100	100	99.38	77.16
putative high-affinity iron permease	fig|6666666.157468.peg.1426	100	100	100	98.99	98.99	98.99	98.28	98.28	98.28	98.28	98.28	98.28	98.28	98.28	97.35	97.49	98.28	98.13	97.2	97.36	96.35	87.64
probable lipoprotein	fig|6666666.157468.peg.1431	100	100	100	99.34	99.34	99.34	95.42	95.42	95.42	95.42	98.68	98.68	98.68	98.68	96.08	95.42	98.68	98.68	95.42	99.34	95.56	79.33
possible ABC transport system periplasmic substrate-binding protein	fig|6666666.157468.peg.1436	100	100	100	99.32	99.32	99.32	97.97	97.97	97.97	97.97	98.99	98.99	98.99	98.99	99.32	98.99	98.99	98.99	100	100	98.31	74.83
putative ABC transport system permease protein	fig|6666666.157468.peg.1438	100	100	100	98.37	98.37	98.37	97.83	97.83	97.83	97.83	97.83	97.83	97.83	97.83	98.64	98.64	97.83	97.83	98.92	99.19	98.37	82.29
putative periplasmic protein	fig|6666666.157468.peg.1452	100	100	100	96.23	96.23	96.23	96.23	96.23	96.23	96.23	98.11	98.11	98.11	98.11	98.11	98.11	98.11	98.11	96.23	61.76	0	98.11
putative heme oxygenase	fig|6666666.157468.peg.1472	100	100	100	98.41	98.41	98.41	99.6	99.6	99.6	99.6	99.2	99.2	99.2	99.2	98.41	97.21	99.2	99.2	99.6	99.2	97.97	80.08
possible two-component regulator	fig|6666666.157468.peg.1477	100	100	100	99.32	99.32	99.32	98.64	98.64	98.64	98.64	99.66	99.66	99.66	99.66	98.64	98.31	99.66	99.66	98.64	100	98.31	86.44
putative ATP/GTP-binding protein (mrp protein homolog)	fig|6666666.157468.peg.1479	100	100	100	99.46	99.46	99.46	99.18	99.18	99.18	99.18	99.18	99.18	99.18	99.18	99.46	99.18	99.18	99.18	99.18	99.46	98.64	92.66
putative ABC transporter	fig|6666666.157468.peg.1498	100	100	100	99.63	99.63	99.63	99.45	99.45	99.45	99.45	99.63	99.63	99.63	99.63	99.63	99.63	99.63	99.63	99.63	99.63	99.26	97.84
putative bacterial haemoglobin	fig|6666666.157468.peg.1499	100	100	100	97.14	97.14	97.14	97.14	97.14	97.14	97.14	97.14	97.14	97.14	97.14	97.86	97.86	97.14	97.14	97.14	97.86	91.43	85.71
putative peptide ABC-transport system permease protein	fig|6666666.157468.peg.1509	100	100	100	98.09	98.09	98.09	98.41	98.41	98.41	98.41	98.41	98.41	98.41	98.41	98.73	98.73	98.41	98.41	98.41	97.13	97.13	87.9
putative peptide ABC-transport system permease protein	fig|6666666.157468.peg.1510	100	100	100	98.47	98.47	98.47	99.24	99.24	99.24	99.24	98.85	98.85	98.85	98.47	99.24	99.62	98.85	98.47	99.62	98.85	97.71	79.77
putative peptide ABC-transport system ATP-binding protein	fig|6666666.157468.peg.1511	100	100	100	98.55	98.2	98.2	98.65	98.2	98.65	98.65	98.2	98.2	98.2	98.2	98.2	98.2	98.55	98.65	98.65	98.65	97.3	0
putative acetyltransferase (EC 2.3.1.-)	fig|6666666.157468.peg.1558	100	100	100	96.71	96.71	96.71	98.03	98.03	98.03	98.03	91.45	91.45	98.03	98.03	0	0	98.03	99.26	99.34	0	0	98.58
NagD, predicted sugar phosphatases of the HAD superfamily	fig|6666666.157468.peg.1578	100	100	100	98.82	98.82	98.82	99.22	99.22	99.22	99.22	99.22	99.22	99.22	99.22	97.25	97.25	99.22	99.22	97.25	97.25	96.47	98.82
putative transmembrane transport protein	fig|6666666.157468.peg.1602	100	100	100	99.67	99.67	99.67	99.34	99.34	99.34	99.34	99.78	99.78	99.56	99.56	100	99.34	99.56	99.78	99.32	99.78	28.64	28.47
putative uncharacterized protein FIG019238	fig|6666666.157468.peg.1613	100	100	100	100	100	100	100	100	100	100	100	100	100	100	100	100	100	100	100	100	95.83	82.14
probable transmembrane protein Cj0352	fig|6666666.157468.peg.1615	100	100	100	100	100	100	100	100	100	100	100	100	100	98.11	98.87	98.72	100	100	98.28	99.62	96.11	73.02
Oxygen-independent coproporphyrinogen III oxidase, putative	fig|6666666.157468.peg.1625	100	100	100	97.99	97.99	97.99	97.54	97.54	97.54	97.32	97.99	97.99	97.99	97.77	98.66	97.99	97.99	97.99	98.66	98.2	99.78	84.63
putative sulfite oxidase subunit YedY	fig|6666666.157468.peg.1641	100	100	100	100	100	100	98.32	98.32	98.32	98.32	99.66	99.66	99.66	100	98.32	97.64	100	100	98.32	99.33	96.63	90.57
putative ATP /GTP binding protein	fig|6666666.157468.peg.1673	100	100	100	97.25	97.25	97.25	97.39	97.39	97.39	97.39	97.94	97.94	97.94	97.94	97.94	97.58	97.94	97.94	97.94	98.63	95.88	73.63
putative ATP /GTP binding protein	fig|6666666.157468.peg.1674	100	100	100	97.54	97.54	97.54	100	100	100	23.08	99.01	99.01	99.01	0	99.01	99.01	99.01	98.85	98.85	98.24	96.22	0
putative H-T-H containing protein	fig|6666666.157468.peg.1683	100	100	100	98.55	98.55	98.55	98.55	98.55	98.55	98.55	98.55	98.55	98.55	98.55	0	100	98.55	98.55	0	100	91.18	100
putative integral membrane protein	fig|6666666.157468.peg.1684	100	100	100	100	100	100	98.67	98.67	98.67	98.67	98.67	98.67	98.67	98.67	0	100	98.67	97.3	0	0	0	0
putative acidic periplasmic protein	fig|6666666.157468.peg.1685	100	100	100	99.52	99.52	99.52	100	100	100	100	100	100	100	99.52	0	100	100	100	0	0	0	0
putative periplasmic ATP /GTP-binding protein	fig|6666666.157468.peg.1692	100	100	100	97.9	97.9	97.9	99.16	99.16	99.16	99.16	99.16	99.16	99.16	98.98	99.16	99.16	99.16	99.16	99.58	98.74	97.48	64.44
putative type IIS restriction/modification enzyme	fig|6666666.157468.peg.1699	100	100	100	94.12	98.95	98.95	74.8	74.8	74.8	74.8	74.88	74.88	90.01	98.6	81.57	77.18	87.23	90.55	85.37	100	65.68	84.67
putative PERIPLASMIC PROTEIN	fig|6666666.157468.peg.1701	100	100	100	97	97	97	98.71	98.71	98.71	98.71	98.71	98.71	98.71	97.42	98.28	98.71	99.14	100	99.14	97.42	98.28	99.57
putative efflux protein	fig|6666666.157468.peg.1702	100	100	100	97.5	97.5	97.5	99	99	99	99	99	99	99	99.25	100	93.5	98.75	97.75	99.25	98.5	51.25	99
Predicted Rossmann fold nucleotide-binding protein, possible lysine decarboxylase	fig|6666666.157468.peg.1719	100	100	100	100	100	100	99.5	99.5	99.5	99.5	100	100	99.5	99.5	99.5	94.53	99.5	100	99	99.5	92.54	90.05
Predicted L-lactate dehydrogenase, hypothetical protein subunit YkgG	fig|6666666.157468.peg.1740	100	100	100	98.17	98.17	98.17	97.71	97.71	97.71	97.71	97.71	97.71	97.71	97.71	98.17	97.71	97.71	97.71	98.17	99.54	97.71	83.03
predicted L-lactate dehydrogenase, Iron-sulfur cluster-binding subunit YkgF	fig|6666666.157468.peg.1741	100	100	100	99.37	99.37	99.37	99.16	99.16	99.16	99.16	99.16	99.16	99.16	99.16	99.37	99.58	99.16	99.16	99.16	99.79	98.75	91.44
predicted L-lactate dehydrogenase, Fe-S oxidoreductase subunit YkgE	fig|6666666.157468.peg.1742	100	100	100	98.78	98.78	98.78	97.55	97.55	97.55	97.55	97.55	97.55	97.55	97.55	98.37	97.55	97.55	97.55	98.37	98.78	97.96	93.06
TonB-like; putative TolA function	fig|6666666.157468.peg.1776	100	100	100	100	100	100	98.84	98.84	98.84	98.84	97.68	97.68	98.84	98.84	99.61	99.23	99.2	99.61	99.03	98.07	96.91	77.17
TPR repeat containing exported protein; putative periplasmic protein contains a protein prenylyltransferase domain	fig|6666666.157468.peg.1779	100	100	100	99.68	99.68	99.68	99.68	99.68	99.68	99.68	99.68	99.68	99.68	99.68	99.68	99.05	99.68	99.68	99.05	99.68	97.78	75.47
probable membrane protein Cj0124c	fig|6666666.157468.peg.1790	100	100	100	100	100	100	100	100	100	100	100	100	100	100	98.78	100	100	100	97.87	100	96.95	76.22
putative fructose-1,6-bisphosphatase or related enzymes of inositol monophosphatase family	fig|6666666.157468.peg.1794	100	100	100	98.33	98.33	98.33	98.33	98.33	98.33	98.33	96.99	96.99	98.33	98.33	98.33	99.58	98.33	98.33	97.92	98.33	95.83	69.33
McrBC restriction endonuclease system, McrB subunit, putative	fig|6666666.157468.peg.1805	100	100	100	75.99	75.99	75.99	75.65	75.65	75.65	75.65	64.35	64.35	75.65	58.28	69.16	0	75.65	100	63.57	64.63	50.45	81.72
putative helix-turn-helix motif protein	fig|6666666.157468.peg.1817	100	100	100	93.33	93.33	93.33	93.33	93.33	93.33	93.33	93.33	93.33	93.33	93.33	93.33	93.33	93.33	93.33	93.33	97.33	92	85.33
predicted signal transduction protein	fig|6666666.157468.peg.1827	100	100	100	97.54	97.54	97.54	99.3	99.3	99.3	99.3	99.3	99.3	99.3	99.3	97.89	97.54	99.3	99.3	99.3	98.95	97.19	68.53
putative MCP-domain signal transduction protein	fig|6666666.157468.peg.1829	100	100	100	86.67	86.67	86.67	94.21	94.21	94.21	94.21	94.21	94.21	93.39	94.21	85	91.74	94.21	94.21	93.62	96.12	95.06	0
predicted amino-acid acetyltransferase (EC 2.3.1.1) complementing ArgA function in Arginine Biosynthesis pathway	fig|6666666.157468.peg.1849	100	100	100	100	100	100	97.97	97.97	97.97	97.97	97.97	97.97	97.97	97.97	97.3	97.97	97.97	97.97	97.3	98.65	97.97	0
putative serine/threonine protein phosphatase (EC 3.1.3.16)	fig|6666666.157468.peg.1884	100	100	100	99.24	99.24	99.24	99.75	99.75	99.75	99.75	99.75	99.75	99.75	99.48	98.48	98.48	99.75	99.75	98.48	98.73	95.56	76.4
putative outer membrane siderophore receptor	fig|6666666.157468.peg.1890	100	100	100	99.6	99.6	99.6	99.21	99.21	99.21	99.21	99.34	99.34	99.21	99.21	0	99.34	99.21	99.21	99.47	99.34	0	54.62
putative lipoprotein, similar to CjrA of Escherichia coli O164	fig|6666666.157468.peg.1891	100	100	100	99.29	99.29	99.29	99.65	99.65	99.65	99.65	99.65	99.65	99.65	99.65	0	99.29	99.65	99.65	99.65	98.94	0	92.47
putative lipoprotein of ferric iron transporter system	fig|6666666.157468.peg.1892	100	100	100	97.22	97.22	97.22	97.22	97.22	97.22	97.22	97.22	97.22	97.22	94.74	0	97.22	97.22	97.22	97.22	100	86.67	75
putative iron-uptake ABC transport system ATP-binding protein	fig|6666666.157468.peg.1895	100	100	100	100	100	100	96.35	96.35	96.35	96.35	96.35	96.35	96.35	96.35	97.01	99.67	96.35	96.35	96.35	96.35	99	88.7
putative haem-binding lipoprotein	fig|6666666.157468.peg.1907	100	100	100	100	100	100	99.29	99.29	99.29	99.29	99.29	99.29	99.29	99.29	97.16	97.16	99.29	99.29	97.16	99.29	95.74	63.24
predicted endonuclease distantly related to archaeal Holliday junction resolvase	fig|6666666.157468.peg.1917	100	100	100	96.43	96.43	96.43	99.11	99.11	99.11	99.11	96.43	96.43	99.11	99.11	99.11	96.43	99.11	99.11	99.11	99.11	97.32	80.36
putative phosphatase	fig|6666666.157468.peg.1920	100	100	100	97.64	97.64	97.64	100	100	100	100	97.64	97.64	100	100	98.31	97.47	100	100	97.81	98.48	97.13	85.83
M protein, putative	fig|6666666.157468.peg.1933	100	100	100	0	0	0	0	0	0	0	0	0	0	0	0	0	0	0	0	0	98.98	0
pilT protein, putative	fig|6666666.157468.peg.1934	100	100	100	0	0	0	0	0	0	0	0	0	0	0	0	0	0	0	0	0	95.95	0
predicted signal transduction protein	fig|6666666.157468.peg.1935	100	100	100	49.12	49.12	49.12	50.18	50.18	50.18	50.18	50.18	50.18	50.18	50.18	49.47	49.12	50.18	50.18	49.82	49.82	95.92	49.12
thioredoxin, putative	fig|6666666.157468.peg.1976	100	100	100	0	0	0	0	0	0	0	0	0	0	0	0	0	0	0	0	0	95.77	0
C. HYPOTHETICAL (424)
FIG00469490: hypothetical protein	fig|6666666.157468.peg.1	100	75.82	75.82	96.7	96.7	96.7	96.7	96.7	96.7	96.7	78.02	78.02	96.7	96.7	96.7	95.6	96.7	96.7	95.6	96.7	91.21	96.7
FIG00469957: hypothetical protein	fig|6666666.157468.peg.11	100	100	100	100	100	100	100	100	95.16	100	100	100	100	0	100	0	0	0	88.98	0	0	88.98
FIG00470273: hypothetical protein	fig|6666666.157468.peg.12	100	100	100	100	100	100	100	100	0	100	100	100	100	0	100	0	0	0	95.15	0	0	93.69
FIG00470802: hypothetical protein	fig|6666666.157468.peg.14	100	99.72	99.72	100	100	100	99.72	99.72	93.18	99.72	98.86	98.86	99.72	0	99.15	0	0	0	99.15	0	0	98.21
hypothetical protein	fig|6666666.157468.peg.17	100	0	100	100	100	100	0	0	100	100	100	0	0	0	100	0	0	0	0	0	0	100
FIG00472059: hypothetical protein	fig|6666666.157468.peg.19	100	100	100	0	0	0	100	100	0	100	0	0	100	0	0	0	0	0	0	0	0	92.11
FIG00471069: hypothetical protein	fig|6666666.157468.peg.24	100	100	100	99.01	99.01	99.01	100	100	0	100	100	100	100	0	100	0	0	0	0	0	0	100
FIG00471065: hypothetical protein	fig|6666666.157468.peg.25	100	100	100	100	100	100	100	100	0	100	100	100	100	0	0	0	0	0	0	0	0	99.22
FIG00469626: hypothetical protein	fig|6666666.157468.peg.26	100	100	100	98.24	98.24	98.24	100	100	54.88	100	100	100	100	0	100	0	0	0	0	0	0	100
FIG00471537: hypothetical protein	fig|6666666.157468.peg.27	100	100	100	87.03	87.03	87.03	100	100	0	100	100	100	100	0	100	0	0	0	0	0	0	100
FIG00469557: hypothetical protein	fig|6666666.157468.peg.28	100	100	100	98.86	98.86	98.86	100	100	0	100	100	100	100	0	100	0	0	0	92.05	0	0	100
FIG00469385: hypothetical protein	fig|6666666.157468.peg.29	100	100	100	98.39	98.39	98.39	100	100	98.92	100	100	100	100	0	100	0	0	0	99.46	96.77	0	97.31
FIG00469707: hypothetical protein	fig|6666666.157468.peg.30	100	100	100	98.86	98.86	98.86	100	100	0	100	100	100	100	0	100	0	0	0	97.73	94.32	0	94.32
FIG00469644: hypothetical protein	fig|6666666.157468.peg.32	100	100	100	60.68	60.68	60.68	99.27	99.27	0	99.27	0	0	100	0	100	0	0	0	91.88	0	0	74.26
FIG00470991: hypothetical protein	fig|6666666.157468.peg.35	100	97.85	97.85	100	100	100	97.85	97.85	0	97.85	100	100	97.85	0	100	0	0	0	97.85	0	0	97.85
FIG00471711: hypothetical protein	fig|6666666.157468.peg.36	100	100	100	100	100	100	100	100	0	100	100	100	100	0	100	0	0	0	93.1	0	0	93.6
FIG00469861: hypothetical protein	fig|6666666.157468.peg.37	100	100	100	100	100	100	100	100	0	100	99.08	99.08	100	0	99.08	0	0	0	0	79.52	0	88.48
hypothetical protein	fig|6666666.157468.peg.42	100	0	98.33	0	0	0	100	100	100	100	100	100	100	0	0	0	0	0	0	0	0	0
conserved hypothetical protein	fig|6666666.157468.peg.44	100	0	0	0	0	0	100	100	100	100	100	100	100	0	0	0	0	0	0	0	0	0
hypothetical protein	fig|6666666.157468.peg.48	100	0	0	0	0	0	100	100	100	100	100	100	100	0	0	0	0	0	0	0	0	0
hypothetical protein	fig|6666666.157468.peg.51	100	0	100	0	0	0	100	100	100	100	100	100	100	0	0	0	0	0	0	0	0	0
hypothetical protein	fig|6666666.157468.peg.53	100	0	0	0	0	0	100	100	100	100	100	100	100	0	0	0	0	0	0	0	0	0
hypothetical protein	fig|6666666.157468.peg.56	100	0	0	0	0	0	97.78	97.78	97.78	97.78	0	97.78	97.78	0	0	0	0	0	0	0	0	0
hypothetical protein	fig|6666666.157468.peg.66	100	0	100	0	0	0	100	100	100	100	100	100	100	0	0	0	0	0	0	0	39.08	0
hypothetical protein	fig|6666666.157468.peg.67	100	0	0	0	0	0	100	100	100	100	100	100	100	0	0	0	0	0	0	0	0	0
hypothetical protein	fig|6666666.157468.peg.68	100	0	0	0	0	0	100	100	100	100	100	100	100	0	0	0	0	0	0	0	0	0
hypothetical protein	fig|6666666.157468.peg.69	100	0	0	0	0	0	100	100	100	100	100	100	100	0	0	0	0	0	0	0	0	0
hypothetical protein	fig|6666666.157468.peg.70	100	0	96.83	0	0	100	100	100	100	100	100	100	100	0	0	0	0	0	0	0	0	0
hypothetical protein	fig|6666666.157468.peg.72	100	0	100	0	0	0	100	100	100	100	100	100	100	0	0	0	0	0	0	0	0	0
hypothetical protein	fig|6666666.157468.peg.74	100	0	0	0	0	0	100	100	100	100	100	100	100	0	0	0	0	0	0	0	0	0
hypothetical protein	fig|6666666.157468.peg.75	100	0	0	0	0	0	100	100	100	100	100	100	100	0	0	0	0	0	0	0	0	0
FIG00469626: hypothetical protein	fig|6666666.157468.peg.76	100	62.8	62.8	62.2	62.2	62.2	80.24	80.24	80.24	80.24	80.24	80.24	100	0	62.8	0	0	0	0	0	0	62.8
FIG00471065: hypothetical protein	fig|6666666.157468.peg.77	100	89.92	89.92	89.92	89.92	89.92	89.92	89.92	0	89.92	89.92	89.92	100	0	0	0	0	0	0	0	0	89.15
hypothetical protein	fig|6666666.157468.peg.78	100	0	0	0	0	0	0	0	0	0	0	0	100	0	0	0	0	0	0	0	0	0
hypothetical protein	fig|6666666.157468.peg.79	100	89.19	89.19	0	0	0	87.5	87.5	87.5	87.5	87.5	87.5	97.5	0	0	0	0	0	0	0	0	0
hypothetical protein	fig|6666666.157468.peg.83	100	100	100	0	0	0	0	0	0	0	0	0	0	0	0	0	0	0	0	0	0	0
hypothetical protein	fig|6666666.157468.peg.84	100	100	100	0	0	0	0	0	0	0	0	0	0	0	0	0	0	0	0	0	0	0
FIG00469806: hypothetical protein	fig|6666666.157468.peg.85	100	100	100	0	0	0	0	0	0	0	0	0	0	0	0	0	0	0	0	0	88.89	66.24
hypothetical protein	fig|6666666.157468.peg.86	100	100	100	0	0	0	0	0	0	0	0	0	0	0	0	0	0	0	0	0	59.72	0
hypothetical protein	fig|6666666.157468.peg.89	100	100	100	0	0	0	0	0	0	0	0	0	0	0	0	0	0	0	0	0	87.27	0
hypothetical protein	fig|6666666.157468.peg.90	100	100	100	0	0	0	0	0	0	0	0	0	0	0	0	0	0	0	0	0	98.97	0
hypothetical protein	fig|6666666.157468.peg.91	100	100	100	0	0	0	0	0	0	0	0	0	0	0	0	0	0	0	0	0	99.51	0
hypothetical protein	fig|6666666.157468.peg.92	100	100	100	0	0	0	0	0	0	0	0	0	0	0	0	0	0	0	0	0	0	0
hypothetical protein	fig|6666666.157468.peg.93	100	100	100	0	0	0	0	0	0	0	0	0	0	0	0	0	0	0	0	0	94.17	0
hypothetical protein	fig|6666666.157468.peg.94	100	100	100	0	0	0	0	0	0	0	0	100	0	0	0	0	0	0	0	0	83.33	0
hypothetical protein	fig|6666666.157468.peg.95	100	100	100	0	0	0	0	0	0	0	0	0	0	0	0	0	0	0	0	0	0	0
hypothetical protein	fig|6666666.157468.peg.96	100	100	100	0	0	0	0	0	0	0	0	0	0	0	0	0	0	0	0	0	98.58	0
hypothetical protein	fig|6666666.157468.peg.98	100	100	100	0	0	0	0	0	0	0	0	0	0	0	0	0	0	0	0	62.16	97.53	78.38
hypothetical protein	fig|6666666.157468.peg.100	100	100	100	0	0	0	0	0	0	0	0	0	0	0	0	0	0	0	0	0	88.41	0
hypothetical protein	fig|6666666.157468.peg.101	100	100	100	0	0	0	0	0	0	0	0	0	0	0	0	0	0	0	0	0	41.24	0
hypothetical protein	fig|6666666.157468.peg.102	100	100	100	0	0	0	0	0	0	0	0	0	0	0	0	0	0	0	0	0	0	0
hypothetical protein	fig|6666666.157468.peg.103	100	100	100	0	0	0	0	0	0	0	0	0	0	0	0	0	0	0	0	0	0	0
hypothetical protein	fig|6666666.157468.peg.104	100	100	100	0	0	0	0	0	0	0	0	0	0	0	0	0	0	0	0	0	0	0
hypothetical protein	fig|6666666.157468.peg.105	100	100	100	0	0	0	0	0	0	0	0	0	0	0	0	0	0	0	0	0	0	0
hypothetical protein	fig|6666666.157468.peg.106	100	100	100	0	0	0	0	0	0	0	0	0	0	0	0	0	0	0	0	0	0	0
hypothetical protein	fig|6666666.157468.peg.107	100	100	100	0	0	0	0	0	0	0	0	0	0	0	80.82	0	0	0	0	0	0	0
hypothetical protein	fig|6666666.157468.peg.108	100	100	100	0	0	0	0	0	0	0	0	0	0	0	0	0	0	0	0	0	0	0
hypothetical protein	fig|6666666.157468.peg.109	100	100	100	0	0	0	0	0	0	0	0	0	0	0	0	0	0	0	0	0	93.02	0
hypothetical protein	fig|6666666.157468.peg.110	100	100	100	0	0	0	0	0	0	0	0	0	0	0	0	0	0	0	0	0	0	0
FIG00470782: hypothetical protein	fig|6666666.157468.peg.111	100	100	100	0	0	0	0	0	0	0	0	0	0	0	0	0	0	0	0	0	93.75	94.19
hypothetical protein	fig|6666666.157468.peg.112	100	100	100	0	0	0	0	0	0	0	0	0	0	0	0	0	0	0	0	0	94.59	94.59
hypothetical protein	fig|6666666.157468.peg.113	100	100	100	0	0	0	0	0	0	0	0	0	0	0	0	0	0	0	0	0	98.53	0
hypothetical protein	fig|6666666.157468.peg.115	100	100	100	0	0	0	0	0	0	0	0	0	0	0	0	0	0	0	0	0	0	0
hypothetical protein	fig|6666666.157468.peg.116	100	100	100	0	0	0	0	0	0	0	0	0	0	0	0	0	0	0	0	0	96.03	0
FIG00471323: hypothetical protein	fig|6666666.157468.peg.118	100	55.1	55.1	100	100	100	100	100	0	100	100	100	100	0	0	0	0	0	94.05	0	0	0
FIG00470952: hypothetical protein	fig|6666666.157468.peg.119	100	95.83	95.83	100	100	100	100	100	0	100	97.22	97.22	100	0	97.22	0	0	0	100	0	0	95.83
FIG00470960: hypothetical protein	fig|6666666.157468.peg.120	100	91.46	91.46	100	100	100	100	100	0	100	99.83	99.83	100	0	99.83	0	0	25.61	97.15	0	0	95.29
FIG00470038: hypothetical protein	fig|6666666.157468.peg.123	100	100	100	100	100	100	100	100	100	100	100	100	100	0	100	0	0	0	99.07	0	0	99.07
hypothetical protein	fig|6666666.157468.peg.125	100	87.5	87.5	100	100	100	100	100	0	100	100	100	100	0	0	0	0	0	0	0	0	0
hypothetical protein	fig|6666666.157468.peg.126	100	100	100	100	100	100	100	100	0	100	0	0	100	0	0	0	0	0	0	0	0	0
FIG00471987: hypothetical protein	fig|6666666.157468.peg.129	100	100	100	100	100	100	100	100	0	100	100	100	100	0	100	0	0	0	77.27	0	0	77.27
FIG00470457: hypothetical protein	fig|6666666.157468.peg.131	100	98.9	98.9	100	100	100	100	100	0	100	98.9	98.9	100	0	98.9	0	0	0	98.9	0	0	98.9
hypothetical protein	fig|6666666.157468.peg.133	100	100	100	0	0	0	0	0	0	0	0	0	0	0	0	0	0	0	0	94.52	0	95.65
hypothetical protein	fig|6666666.157468.peg.135	100	100	100	0	0	0	0	0	0	0	0	0	0	0	0	0	0	0	0	0	0	0
hypothetical protein	fig|6666666.157468.peg.136	100	100	100	0	0	0	0	0	0	0	0	0	0	0	0	0	0	0	0	98	0	96
hypothetical protein	fig|6666666.157468.peg.138	100	100	100	0	0	0	0	0	0	0	0	0	0	0	0	0	0	0	0	0	0	100
FIG00469988: hypothetical protein	fig|6666666.157468.peg.141	100	100	100	0	0	0	0	0	0	0	0	0	0	0	0	0	0	0	0	0	0	100
hypothetical protein	fig|6666666.157468.peg.142	100	100	0	0	100	0	100	0	100	0	100	0	0	0	0	0	0	0	0	0	0	0
hypothetical protein	fig|6666666.157468.peg.146	100	0	0	0	100	0	100	0	100	0	100	0	0	0	0	0	0	0	0	0	0	0
hypothetical protein	fig|6666666.157468.peg.147	100	0	0	0	100	0	100	0	100	0	100	0	0	0	0	0	0	0	0	0	0	0
FIG00469624: hypothetical protein	fig|6666666.157468.peg.149	100	100	100	0	0	0	0	0	0	0	0	0	0	0	0	0	0	0	0	90.38	0	96.71
hypothetical protein	fig|6666666.157468.peg.153	100	100	100	0	0	0	0	0	0	0	0	0	95	0	0	0	0	0	0	76.67	0	77.78
FIG00472656: hypothetical protein	fig|6666666.157468.peg.155	100	100	98.67	0	0	0	0	0	0	0	0	0	0	0	0	0	0	0	0	97.33	97.33	0
hypothetical protein	fig|6666666.157468.peg.156	100	100	100	0	0	0	0	100	0	0	0	0	0	0	0	0	0	0	0	73.68	71.05	73.68
hypothetical protein	fig|6666666.157468.peg.157	100	100	100	0	0	0	0	0	0	0	0	0	0	0	0	0	0	0	0	87.5	0	95.35
hypothetical protein	fig|6666666.157468.peg.158	100	100	100	0	0	0	0	0	0	0	0	0	0	0	0	0	0	0	0	82.98	78.38	97.87
hypothetical protein	fig|6666666.157468.peg.159	100	100	100	0	0	0	0	0	0	0	0	0	0	0	0	0	0	0	0	97.37	100	100
hypothetical protein	fig|6666666.157468.peg.161	100	100	100	0	0	0	100	100	100	100	0	0	100	0	0	0	0	0	0	0	0	0
hypothetical protein	fig|6666666.157468.peg.162	100	100	100	0	0	0	0	100	100	100	0	100	100	0	0	0	0	0	0	0	0	0
FIG00470447: hypothetical protein	fig|6666666.157468.peg.163	100	100	100	100	100	100	100	100	100	100	100	100	100	0	81.08	78.46	0	0	91.89	93.75	0	0
FIG00710473: hypothetical protein	fig|6666666.157468.peg.166	100	100	100	0	0	0	0	0	99.05	0	0	0	0	0	0	0	0	0	0	99.33	0	99.33
hypothetical protein	fig|6666666.157468.peg.171	100	100	100	0	0	0	0	0	0	0	0	0	0	0	0	0	0	0	0	0	0	98.09
hypothetical protein	fig|6666666.157468.peg.172	100	100	100	0	0	0	0	0	0	0	0	0	0	0	0	0	0	0	0	0	0	100
hypothetical protein	fig|6666666.157468.peg.173	100	100	100	0	0	0	0	0	0	0	0	0	0	0	0	0	0	0	0	0	0	99.52
hypothetical protein	fig|6666666.157468.peg.174	100	100	100	0	0	0	0	0	0	0	0	0	0	0	0	0	0	0	0	44.19	0	97.71
conserved hypothetical protein	fig|6666666.157468.peg.175	100	100	100	0	0	0	0	0	0	0	0	0	0	0	0	0	0	0	0	0	0	98.94
conserved hypothetical protein	fig|6666666.157468.peg.176	100	100	100	0	0	0	0	0	0	0	0	0	0	0	0	0	0	0	0	0	0	99.14
hypothetical protein	fig|6666666.157468.peg.177	100	100	100	0	0	0	0	0	0	0	0	0	0	0	0	0	0	0	0	0	0	97.62
hypothetical protein	fig|6666666.157468.peg.179	100	100	100	0	0	0	0	0	0	0	0	0	0	0	0	0	0	0	0	0	0	0
hypothetical protein	fig|6666666.157468.peg.180	100	100	100	0	0	0	0	0	0	0	0	0	0	0	0	0	0	0	0	0	0	0
hypothetical protein	fig|6666666.157468.peg.182	100	100	100	0	0	0	0	0	0	0	0	0	0	0	0	0	0	0	0	0	0	0
hypothetical protein	fig|6666666.157468.peg.183	100	100	100	0	0	0	0	0	0	0	0	0	0	0	0	0	0	0	0	0	0	0
hypothetical protein	fig|6666666.157468.peg.184	100	100	100	0	0	0	0	0	0	0	0	0	0	0	0	0	0	0	0	0	0	0
hypothetical protein	fig|6666666.157468.peg.185	100	100	100	0	0	0	0	0	0	0	0	0	0	0	0	0	0	0	0	0	0	0
hypothetical protein	fig|6666666.157468.peg.187	100	100	100	0	0	0	0	0	0	0	0	0	0	0	0	0	0	0	0	66.67	0	85.71
hypothetical protein	fig|6666666.157468.peg.188	100	100	100	0	0	0	0	0	0	0	0	0	0	0	0	0	0	0	0	0	0	0
hypothetical protein	fig|6666666.157468.peg.189	100	100	100	0	0	0	0	0	0	0	0	0	0	0	0	0	0	0	0	0	0	0
hypothetical protein	fig|6666666.157468.peg.190	100	100	100	0	0	0	0	0	0	0	0	0	0	0	0	0	0	0	0	95.68	0	90.78
hypothetical protein	fig|6666666.157468.peg.191	100	100	100	0	0	0	0	0	0	0	0	0	0	0	0	0	0	0	0	68.08	0	0
hypothetical protein	fig|6666666.157468.peg.192	100	100	100	0	0	0	0	0	0	0	0	0	0	0	0	0	0	0	0	96.9	0	97.38
FIG00638667: hypothetical protein	fig|6666666.157468.peg.202	100	100	100	97.37	97.37	97.37	100	100	100	100	100	100	100	100	100	100	100	100	100	100	100	54.55
FIG00469618: hypothetical protein	fig|6666666.157468.peg.206	100	100	100	99.33	99.33	99.33	97.32	97.32	97.32	97.32	100	100	100	100	98.66	98.66	100	100	100	100	97.32	79.87
FIG00469427: hypothetical protein	fig|6666666.157468.peg.217	100	100	100	100	100	100	100	100	100	100	100	100	98.8	98.8	100	95.18	98.8	100	100	100	80.72	57.83
FIG00469921: hypothetical protein	fig|6666666.157468.peg.230	100	100	100	0	0	0	0	0	98.8	0	0	0	0	0	0	0	0	0	0	0	97.4	0
hypothetical domain / C-terminal domain of CinA type S	fig|6666666.157468.peg.245	100	100	100	98.34	98.34	98.34	98.34	98.34	98.34	98.34	98.34	98.34	98.34	98.9	98.9	98.9	98.34	99.45	96.13	100	98.07	81.77
FIG00469642: hypothetical protein	fig|6666666.157468.peg.251	100	100	100	99.65	99.65	99.65	93.03	93.03	90.59	96.43	99.65	99.65	93.03	99.65	95.83	95.83	93.03	100	95.49	100	94.1	74.53
FIG00638667: hypothetical protein	fig|6666666.157468.peg.260	100	100	100	98.64	98.64	98.64	98.64	98.64	98.64	98.64	98.64	98.64	98.64	98.64	98.64	98.64	98.64	99.5	98.18	98.64	99.55	50
FIG00469765: hypothetical protein	fig|6666666.157468.peg.271	100	100	100	100	100	100	100	100	100	100	99.35	99.35	100	100	99.78	99.57	100	99.78	99.78	98.71	98.7	79.05
FIG00469468: hypothetical protein	fig|6666666.157468.peg.282	100	100	100	99.31	99.31	99.31	99.31	99.31	99.31	99.31	99.31	99.31	99.31	99.31	99.31	98.62	99.31	99.31	97.93	97.24	95.86	78.62
FIG00471437: hypothetical protein	fig|6666666.157468.peg.321	100	100	100	0	0	0	0	0	0	0	58.61	58.61	58.61	76.34	0	0	71.6	0	0	99.32	0	0
FIG00471123: hypothetical protein	fig|6666666.157468.peg.334	100	100	100	0	0	0	100	100	100	100	100	100	100	0	0	0	100	0	0	0	0	0
hypothetical protein Cj1162c	fig|6666666.157468.peg.336	100	100	100	100	100	100	100	100	100	100	100	100	100	100	96.88	100	100	100	96.88	100	96.88	56.06
FIG00469836: hypothetical protein	fig|6666666.157468.peg.338	100	100	100	100	100	100	100	100	100	100	100	100	100	100	100	100	100	100	100	100	94.81	88.76
hypothetical protein	fig|6666666.157468.peg.344	100	100	100	89.88	89.88	89.88	98.74	98.74	98.74	98.74	88.36	88.36	90.87	90.25	94.75	90.27	91.08	87.94	89.58	98.95	93.89	0
FIG000859: hypothetical protein YebC	fig|6666666.157468.peg.346	100	100	100	99.15	99.15	99.15	99.57	99.57	99.57	0	99.15	99.15	99.15	99.15	99.57	99.57	99.15	99.57	99.57	99.15	97.87	99.57
FIG00638667: hypothetical protein	fig|6666666.157468.peg.367	100	100	100	100	100	100	98.51	98.51	98.51	98.51	100	100	98.13	98.51	99.63	98.51	100	97.76	98.13	99.63	96.77	72.12
hypothetical protein	fig|6666666.157468.peg.377	100	100	100	100	100	100	100	100	100	100	100	100	100	100	98.41	100	100	100	100	100	0	72.73
hypothetical protein	fig|6666666.157468.peg.382	100	100	100	100	100	100	100	100	100	100	0	0	0	0	0	0	0	0	0	0	0	0
FIG00469741: hypothetical protein	fig|6666666.157468.peg.387	100	100	100	98.34	98.34	98.34	98.34	98.34	98.34	98.34	98.76	98.76	98.34	0	98.76	98.76	98.34	98.34	98.76	98.31	98.76	75.88
FIG00469930: hypothetical protein	fig|6666666.157468.peg.389	100	100	100	100	100	100	100	100	100	100	100	100	100	100	97.01	98.51	100	100	98.51	97.01	97.01	80.6
FIG00472540: hypothetical protein	fig|6666666.157468.peg.392	100	100	100	96.45	96.45	96.45	96.45	96.45	96.45	96.45	97.4	97.4	99.05	96.45	97.04	96.93	96.45	96.45	97.04	96.57	94.8	72.34
FIG00469465: hypothetical protein	fig|6666666.157468.peg.405	100	100	100	99.09	99.09	99.09	99.09	99.09	99.09	99.09	99.09	99.09	99.09	99.09	99.09	99.09	99.09	99.09	99.09	98.18	98.18	72.48
FIG00469769: hypothetical protein	fig|6666666.157468.peg.413	100	100	100	98.75	98.75	98.75	99.5	99.5	99.5	99.5	99.5	99.5	99.5	99.5	94.17	100	99.5	99.5	94	100	0	57
FIG00469756: hypothetical protein	fig|6666666.157468.peg.415	100	100	100	100	100	100	100	100	100	100	100	100	100	100	100	100	100	100	100	100	100	73.53
FIG00469585: hypothetical protein	fig|6666666.157468.peg.420	100	100	100	99.36	99.36	99.36	99.36	99.36	99.36	99.36	98.72	98.72	99.36	99.36	97.44	99.36	99.36	99.36	98.72	98.72	98.08	66.67
FIG00470841: hypothetical protein	fig|6666666.157468.peg.421	100	100	100	100	100	100	100	100	100	100	100	100	100	0	0	100	100	100	100	100	100	0
FIG00469607: hypothetical protein	fig|6666666.157468.peg.423	100	100	100	99.59	99.59	99.59	99.59	99.59	99.59	99.59	98.77	98.77	99.59	99.59	98.56	97.53	99.59	99.59	98.35	99.79	98.77	93.21
FIG00387922: hypothetical protein	fig|6666666.157468.peg.425	100	100	100	100	100	100	100	100	100	100	98.67	98.67	98.67	100	98.67	100	100	100	98.67	100	96	78.67
FIG00469624: hypothetical protein	fig|6666666.157468.peg.456	100	100	100	0	0	0	0	0	0	0	0	0	0	0	0	0	0	0	0	95.06	0	86.49
FIG00470730: hypothetical protein	fig|6666666.157468.peg.457	100	100	100	0	0	0	0	0	0	0	0	0	0	0	0	0	0	0	0	95.88	0	0
hypothetical protein	fig|6666666.157468.peg.459	100	100	100	0	0	0	0	0	0	0	0	0	0	0	0	0	0	0	0	0	0	0
hypothetical protein	fig|6666666.157468.peg.464	100	100	100	0	0	0	0	0	0	0	0	0	100	0	0	0	0	0	0	97.78	0	80
hypothetical protein	fig|6666666.157468.peg.465	100	100	100	0	0	0	0	0	0	0	0	0	0	0	0	0	0	0	0	0	0	76.32
FIG00469655: hypothetical protein	fig|6666666.157468.peg.475	100	100	100	94.05	94.05	94.05	95.35	95.35	95.35	95.35	95.35	95.35	95.35	49.49	89.36	90.82	95.35	91.11	88.64	94.05	0	34.88
hypothetical protein	fig|6666666.157468.peg.478	100	100	100	0	0	0	93.1	91.43	93.1	0	93.1	93.1	93.1	0	0	0	93.1	0	0	0	0	0
hypothetical protein	fig|6666666.157468.peg.479	100	100	100	98.33	98.33	98.33	0	0	0	0	0	0	0	0	87.1	88.52	0	95	0	93.33	0	0
FIG00638667: hypothetical protein	fig|6666666.157468.peg.483	100	100	100	98.26	98.26	98.26	98.42	98.42	98.42	98.42	98.42	98.42	98.26	98.44	99.53	99.38	98.26	99.21	98.58	0	0	38.78
FIG00638667: hypothetical protein	fig|6666666.157468.peg.484	100	100	100	95.67	95.67	95.67	95.67	95.67	95.67	31.96	95.67	95.67	95.67	95.67	97.63	95.75	95.67	95.67	95.19	98.53	0	34.21
hypothetical protein	fig|6666666.157468.peg.492	100	100	100	98.21	98.21	98.21	97.32	97.32	97.32	97.32	98.21	98.21	97.32	97.32	98.21	98.21	97.32	97.32	97.32	98.21	0	98.21
hypothetical protein	fig|6666666.157468.peg.493	100	100	100	90.74	90.74	90.74	87.04	87.04	87.04	87.04	86.21	86.21	87.04	87.04	84.48	84.48	87.04	87.04	87.04	84.48	0	88.89
FIG00469380: hypothetical protein	fig|6666666.157468.peg.498	100	100	100	100	100	100	100	100	100	100	98.36	98.36	100	100	100	100	100	100	98.36	98.36	95.08	98.36
hypothetical protein YggS, proline synthase co-transcribed bacterial homolog PROSC	fig|6666666.157468.peg.503	100	100	100	100	100	100	100	100	100	100	100	100	100	100	99.52	99.52	100	100	99.52	100	96.67	88.1
FIG137478: hypothetical protein	fig|6666666.157468.peg.516	100	100	100	97.06	97.06	97.06	97.06	97.06	97.06	97.06	97.06	97.06	97.06	97.06	100	99.58	97.06	97.06	100	100	98.32	84.87
FIG137478: hypothetical protein	fig|6666666.157468.peg.517	100	100	100	97.93	97.93	97.93	97.51	97.51	97.51	97.51	97.1	97.1	97.51	97.51	100	100	97.51	97.51	100	98.34	95.44	73.86
FIG00469551: hypothetical protein	fig|6666666.157468.peg.519	100	100	100	100	100	100	100	100	100	100	100	100	100	100	100	100	100	100	99.44	0	98.31	92.86
FIG00469729: hypothetical protein	fig|6666666.157468.peg.522	100	100	100	99.13	99.13	99.13	99.13	99.13	99.13	99.13	99.13	99.13	99.13	99.57	99.13	99.57	99.13	99.57	99.13	100	98.7	81.62
hypothetical protein	fig|6666666.157468.peg.538	100	100	100	100	0	100	0	100	100	0	100	100	100	0	0	100	100	100	100	0	0	0
FIG00638667: hypothetical protein	fig|6666666.157468.peg.543	100	100	100	99.31	99.31	99.31	100	100	100	100	100	100	100	100	99.31	100	100	100	100	100	97.24	58.11
FIG00469447: hypothetical protein	fig|6666666.157468.peg.544	100	100	100	98.75	98.75	98.75	100	100	100	100	100	100	100	100	100	100	100	98.75	100	100	100	93.67
FIG00470215: hypothetical protein	fig|6666666.157468.peg.545	100	100	100	100	100	100	100	100	100	100	100	100	100	100	100	100	100	100	100	100	100	94.74
hypothetical protein	fig|6666666.157468.peg.556	100	100	100	0	0	0	0	0	0	0	0	0	93.55	0	0	0	93.55	0	0	0	0	0
FIG00638667: hypothetical protein	fig|6666666.157468.peg.568	100	100	100	99.45	99.45	99.45	100	100	100	100	100	100	98.35	98.9	100	100	98.35	98.35	100	98.9	95.05	30.81
FIG00469406: hypothetical protein	fig|6666666.157468.peg.577	100	100	100	100	100	100	97.66	97.66	97.66	97.66	97.66	97.66	97.66	97.66	97.66	97.66	97.66	97.45	98.83	91.67	96.49	73.37
FIG00638667: hypothetical protein	fig|6666666.157468.peg.592	100	100	100	98.33	98.33	98.33	99.72	99.72	99.72	99.72	98.89	98.89	98.89	97.78	100	98.61	98.89	98.33	99.72	97.22	94.51	62.33
FIG00469794: hypothetical protein	fig|6666666.157468.peg.595	100	100	100	97.82	97.82	97.51	97.51	97.51	97.51	97.51	97.51	97.51	97.51	96.57	99.69	98.44	98.75	95.64	98.44	98.44	95.33	85.98
hypothetical protein	fig|6666666.157468.peg.606	100	100	100	97.21	96.74	97.21	99.53	99.07	99.07	99.07	70.89	70.89	70.89	99.53	99.53	65.93	99.53	99.07	66.51	44.8	65.78	97.67
FIG00469493: hypothetical protein	fig|6666666.157468.peg.607	100	100	100	96.83	96.83	96.83	100	100	100	100	56.41	56.41	56.7	100	99.01	56.41	99.51	100	56.19	49.74	55.9	91.58
FIG00638667: hypothetical protein	fig|6666666.157468.peg.614	100	100	100	98.21	98.21	98.21	97.62	97.62	97.62	97.62	97.02	97.02	96.73	97.92	97.92	96.73	97.02	97.02	98.21	97.02	94.35	72.67
FIG00638667: hypothetical protein	fig|6666666.157468.peg.626	100	100	100	99.68	99.68	100	99.37	99.37	99.37	99.37	99.68	99.68	99.68	99.68	99.68	99.68	99.68	100	99.37	100	98.42	90.85
FIG00545237: hypothetical protein	fig|6666666.157468.peg.633	100	100	100	93.24	93.24	93.24	96.62	94.59	96.62	96.62	96.62	96.62	96.62	96.62	92.57	96.62	96.62	95.95	93.24	94.59	91.22	37.88
FIG00545237: hypothetical protein	fig|6666666.157468.peg.634	100	100	100	100	100	100	100	100	100	100	100	100	100	100	98.59	100	100	100	100	100	97.18	64.18
hypothetical radical SAM family enzyme in heat shock gene cluster, similarity with CPO of BS HemN-type	fig|6666666.157468.peg.645	100	100	100	99.15	99.15	99.15	98.87	98.87	98.87	31.25	99.15	99.15	99.15	99.15	97.46	97.46	99.15	99.15	97.46	99.15	96.9	72.11
FIG00710232: hypothetical protein	fig|6666666.157468.peg.655	100	100	100	96.5	96.5	96.5	97.67	97.67	97.67	97.67	96.5	96.5	96.5	96.5	97.67	97.67	96.5	96.5	97.67	0	0	61.18
FIG00710232: hypothetical protein	fig|6666666.157468.peg.656	100	100	100	92.23	92.23	92.23	92.23	92.23	92.23	92.23	92.23	92.23	92.23	92.23	100	98.44	92.23	92.23	92.23	0	0	64.76
hypothetical protein Cj0569	fig|6666666.157468.peg.657	100	100	100	99.65	99.65	99.65	99.31	99.31	99.31	99.31	98.96	98.96	98.96	98.96	0	0	98.96	99.31	0	0	0	0
hypothetical protein Cj0566	fig|6666666.157468.peg.658	100	100	100	99.65	99.65	99.65	99.65	99.65	99.65	99.65	99.39	99.39	99.39	99.39	0	0	99.39	99.39	0	0	0	0
conserved hypothetical protein	fig|6666666.157468.peg.659	100	100	100	97.89	97.89	97.89	97.89	97.89	97.89	97.89	100	100	100	0	0	0	100	100	0	0	0	30.3
hypothetical protein	fig|6666666.157468.peg.660	100	100	100	100	100	100	100	100	100	100	0	0	0	0	0	0	0	0	0	0	0	57.53
FIG00470092: hypothetical protein	fig|6666666.157468.peg.661	100	100	100	96.77	96.77	96.77	96.77	96.77	96.77	96.24	98.92	98.92	99.12	98.92	97.31	97.31	98.92	98.92	97.27	98.39	0	0
FIG00469464: hypothetical protein	fig|6666666.157468.peg.669	100	100	100	98.87	98.87	98.87	98.87	98.87	98.87	98.87	98.81	98.81	98.81	98.87	98.49	98.49	98.81	98.87	98.11	99.62	89.06	0
FIG00469865: hypothetical protein	fig|6666666.157468.peg.671	100	100	100	99.4	99.4	99.4	99.7	99.7	99.7	99.7	99.7	99.7	99.7	99.7	99.4	99.1	99.7	99.4	99.4	99.4	97.9	0
FIG00469490: hypothetical protein	fig|6666666.157468.peg.675	100	100	100	75.82	75.82	75.82	75.82	75.82	75.82	75.82	96.7	96.7	75.82	75.82	75.82	75.82	75.82	75.82	75.82	75.82	78.02	75.82
FIG00469524: hypothetical protein	fig|6666666.157468.peg.685	100	100	100	100	100	100	99.44	99.44	99.44	99.44	99.44	99.44	99.44	100	100	100	99.44	99.44	100	99.44	95.51	78.7
FIG00469421: hypothetical protein	fig|6666666.157468.peg.686	100	100	100	100	100	100	100	100	100	100	100	100	100	100	100	100	100	100	100	100	97.7	89.66
FIG01209130: hypothetical protein	fig|6666666.157468.peg.695	100	100	100	98.36	98.36	98.36	98.25	98.25	98.25	98.25	98.25	98.25	98.25	98.25	98.36	98.48	98.25	98.25	98.25	98.13	95.56	68.61
FIG00470600: hypothetical protein	fig|6666666.157468.peg.703	100	100	100	99.04	99.04	99.04	98.08	98.08	98.08	98.08	98.1	98.1	98.08	98.08	97.14	97.14	98.08	98.08	97.14	99.05	93.33	0
FIG00638667: hypothetical protein	fig|6666666.157468.peg.707	100	100	100	99.25	99.25	99.25	98.74	98.74	98.74	98.74	98.24	98.24	98.74	98.92	98.74	98.24	98.74	98.74	97.74	98.92	97.83	68.92
FIG00470286: hypothetical protein	fig|6666666.157468.peg.712	100	100	100	97.92	97.92	97.92	97.92	97.92	97.92	97.92	97.92	97.92	97.92	97.92	98.96	97.92	97.92	97.92	97.92	98.96	94.79	79.35
FIG00545237: hypothetical protein	fig|6666666.157468.peg.724	100	100	100	98.59	98.59	98.59	98.35	98.35	98.35	98.35	99.53	99.53	99.53	99.76	98.35	99.76	99.53	99.53	98.12	99.29	96.46	71.76
FIG00469387: hypothetical protein	fig|6666666.157468.peg.725	100	100	100	98.39	98.39	98.39	99.19	99.19	99.19	99.19	99.19	99.19	99.19	98.39	99.19	99.19	99.19	99.19	99.19	98.39	95.97	84.68
hypothetical protein	fig|6666666.157468.peg.727	100	100	100	93.88	93.88	93.88	93.88	93.88	93.88	93.88	93.88	93.88	93.88	93.88	97.96	93.88	93.88	93.88	100	89.8	91.84	0
FIG00470409: hypothetical protein	fig|6666666.157468.peg.732	100	100	100	0	0	0	99.05	99.05	99.05	99.05	92.38	92.38	91.43	93.33	0	0	91.43	93.33	0	91.43	98.1	94.29
FIG00553873: hypothetical protein	fig|6666666.157468.peg.735	100	100	100	29.23	29.23	98.99	99.54	99.54	99.54	99.54	99.54	99.54	99.54	99.54	29.23	29.23	99.54	99.54	29.23	99.08	96.33	91.28
FIG00469384: hypothetical protein	fig|6666666.157468.peg.755	100	100	100	97.64	97.64	97.64	100	100	100	100	100	100	100	100	99.21	98.43	100	100	98.43	97.64	96.85	89.06
FIG00388607: hypothetical protein	fig|6666666.157468.peg.761	100	100	100	100	100	100	100	100	100	100	100	100	100	100	100	100	100	100	98.75	100	100	80
FIG00469410: hypothetical protein	fig|6666666.157468.peg.764	100	100	100	97.18	97.18	97.18	97.49	97.49	97.49	97.49	99.06	99.06	97.49	97.49	98.75	98.75	97.49	97.49	98.75	99.69	96.87	62.2
FIG01371694: hypothetical protein	fig|6666666.157468.peg.771	100	100	100	100	100	100	100	100	100	100	100	100	100	100	100	100	100	100	100	100	98.59	85.92
FIG00469784: hypothetical protein	fig|6666666.157468.peg.782	100	100	100	97.78	97.78	97.78	99.26	99.26	99.26	99.26	99.26	99.26	99.26	99.26	98.52	98.52	99.26	99.26	98.52	100	99.26	80.74
hypothetical protein	fig|6666666.157468.peg.796	100	100	100	0	0	0	0	0	0	0	0	0	0	0	0	0	0	0	0	0	0	0
FIG00471014: hypothetical protein	fig|6666666.157468.peg.797	100	100	100	0	0	0	0	0	0	0	0	0	98.94	0	0	0	0	0	0	0	93.43	0
FIG00470688: hypothetical protein	fig|6666666.157468.peg.802	100	100	100	0	0	0	0	0	0	0	0	0	0	0	0	0	0	0	0	0	90.55	0
FIG00471953: hypothetical protein	fig|6666666.157468.peg.809	100	100	100	0	0	0	0	0	0	0	0	0	0	0	0	0	0	0	0	0	94.68	0
hypothetical protein	fig|6666666.157468.peg.810	100	100	100	0	0	0	0	0	0	0	0	0	0	0	0	0	0	0	0	0	98.52	0
hypothetical protein	fig|6666666.157468.peg.812	100	100	100	0	0	0	0	0	0	0	0	0	0	0	0	0	0	0	0	0	0	0
FIG00604134: hypothetical protein	fig|6666666.157468.peg.825	100	100	100	98.04	98.04	98.04	94.77	94.77	94.77	94.77	94.77	94.77	98.69	94.77	99.21	96.73	94.77	96.73	94.12	96.08	96.73	97.73
FIG00604134: hypothetical protein	fig|6666666.157468.peg.826	100	100	100	97.37	97.37	97.37	93.42	93.42	93.42	93.42	93.42	93.42	98.68	93.42	94.04	96.71	93.42	94.08	93.42	96.71	93.42	96.71
hypothetical protein Cj1300	fig|6666666.157468.peg.829	100	100	100	54.74	54.74	54.74	54.01	54.01	54.01	54.01	54.01	54.01	53.28	54.01	47.22	55.47	54.01	54.01	54.74	98.54	55.47	98.54
hypothetical protein Cj1300	fig|6666666.157468.peg.830	100	100	100	79.12	79.12	79.12	79.12	79.12	79.12	79.12	79.12	79.12	79.12	79.12	62.37	79.12	79.12	79.12	79.12	100	78.02	100
FIG00469527: hypothetical protein	fig|6666666.157468.peg.836	100	100	100	94.81	92.99	94.81	95.56	95.56	95.56	95.56	95.56	95.56	95.19	95.56	83.27	84.19	95.56	95.56	82.4	96.36	79.26	95.93
FIG00470572: hypothetical protein	fig|6666666.157468.peg.842	100	100	100	100	100	100	100	100	100	100	100	100	100	100	0	0	100	100	100	0	97.48	99.58
FIG00470572: hypothetical protein	fig|6666666.157468.peg.843	100	100	100	87.72	87.72	87.72	89.47	89.47	89.47	89.47	89.47	89.47	89.47	89.47	0	0	89.47	89.47	89.47	0	84.21	98.15
FIG00470572: hypothetical protein	fig|6666666.157468.peg.844	100	100	100	0	0	0	0	0	0	0	0	0	0	0	0	0	0	0	0	0	0	100
FIG00472472: hypothetical protein	fig|6666666.157468.peg.846	100	100	100	88.83	88.83	88.83	94.9	88.83	94.9	88.83	88.83	88.83	88.83	88.83	63.28	62.78	88.83	91.07	88.34	77.11	82.13	100
FIG00470164: hypothetical protein	fig|6666666.157468.peg.855	100	97.83	97.83	71.74	72.83	71.74	81.36	81.36	81.36	81.36	72.29	72.29	81.36	81.36	81.36	0	81.36	81.36	81.36	0	75.9	0
FIG00469667: hypothetical protein	fig|6666666.157468.peg.856	100	100	100	78.47	77.31	78.47	78.47	78.47	77.31	77.31	78.15	78.15	50.53	79.86	55.83	0	78.15	78.15	55	0	78.15	0
FIG00469623: hypothetical protein	fig|6666666.157468.peg.869	100	100	100	78.57	75.96	75.96	75.72	75.72	75.72	80.1	75.72	75.72	75.72	75.96	96.63	78.85	75.96	80.63	97.35	79.28	83.42	79.33
FIG00638667: hypothetical protein	fig|6666666.157468.peg.872	100	100	100	98.49	98.49	98.49	98.28	98.28	98.28	98.28	99.14	99.14	98.28	99.35	98.71	98.92	98.53	99.49	98.92	99.35	96.77	92.02
FIG00470049: hypothetical protein	fig|6666666.157468.peg.887	100	100	100	98.68	98.68	98.68	0	0	0	0	0	0	0	0	0	100	0	0	0	0	0	98.01
FIG00471264: hypothetical protein	fig|6666666.157468.peg.888	100	100	100	98.63	98.63	98.63	0	0	0	0	0	100	0	0	0	99.14	0	0	0	83.85	0	97.75
hypothetical protein	fig|6666666.157468.peg.889	100	100	100	59.32	59.32	59.32	0	0	0	0	0	0	0	0	0	93.98	0	0	0	89.39	0	90.36
FIG00469648: hypothetical protein	fig|6666666.157468.peg.890	100	100	100	100	100	100	100	100	100	100	100	100	100	0	100	100	100	100	100	100	99.26	97.79
FIG00638667: hypothetical protein	fig|6666666.157468.peg.901	100	100	100	100	100	100	98.41	98.41	98.41	98.41	96.83	96.83	96.83	96.83	98.94	96.83	96.83	96.83	100	100	97.88	84.13
FIG00638667: hypothetical protein	fig|6666666.157468.peg.909	100	100	100	99.58	99.58	99.58	100	100	100	100	99.15	99.15	99.15	99.15	99.58	100	99.15	99.58	99.58	100	98.73	88.56
FIG00545237: hypothetical protein	fig|6666666.157468.peg.910	100	100	100	96.02	96.02	96.02	96.59	96.59	96.59	96.59	97.16	97.16	97.16	97.16	95.45	98.23	97.16	97.67	95.45	96.02	86.6	0
FIG00469954: hypothetical protein	fig|6666666.157468.peg.912	100	100	100	95.24	95.24	95.24	95.24	95.24	95.24	95.24	95.24	95.24	95.24	95.24	95.24	95.24	95.24	95.24	94.81	96.1	94.81	67.1
FIG00470277: hypothetical protein	fig|6666666.157468.peg.913	100	100	100	100	100	100	100	100	100	100	100	100	100	100	100	100	100	100	100	100	100	96.12
FIG00638667: hypothetical protein	fig|6666666.157468.peg.931	100	100	100	96.8	96.8	96.8	98.4	98.4	98.4	98.4	100	100	98.4	100	96.8	98.4	100	97.6	98.4	97.6	0	0
hypothetical protein	fig|6666666.157468.peg.950	100	99.73	99.73	0	0	0	0	0	0	0	0	0	0	0	0	0	0	0	0	0	0	0
hypothetical protein	fig|6666666.157468.peg.951	100	100	100	0	0	0	0	0	0	0	0	0	0	0	0	0	0	0	0	0	0	0
hypothetical protein	fig|6666666.157468.peg.953	100	100	100	0	0	0	0	0	0	0	0	0	0	0	0	0	0	0	0	0	0	0
hypothetical UPF0306 protein Cj1449c	fig|6666666.157468.peg.962	100	100	100	98.52	98.52	98.52	99.26	99.26	99.26	99.26	98.52	98.52	98.52	98.52	97.78	98.52	98.52	98.52	97.78	97.78	94.81	89.55
FIG00638667: hypothetical protein	fig|6666666.157468.peg.969	100	100	100	100	100	100	98.53	98.53	98.53	98.53	100	100	100	100	97.12	100	100	100	0	100	0	83.33
FIG00470019: hypothetical protein	fig|6666666.157468.peg.972	100	100	100	98.88	98.88	98.88	96.64	96.64	96.64	96.64	98.32	98.32	98.32	98.32	99.44	99.44	98.32	98.32	97.76	99.16	95.8	73.95
FIG00469721: hypothetical protein	fig|6666666.157468.peg.976	100	100	100	98.23	98.23	98.23	98.23	98.23	98.23	98.23	96.46	96.46	96.46	96.46	97.35	98.23	96.46	96.46	99.12	97.35	94.69	96.46
FIG00469462: hypothetical protein	fig|6666666.157468.peg.977	100	100	100	96.92	96.92	96.92	100	100	100	100	96.92	96.92	96.92	96.92	96.92	96.92	96.92	96.92	100	95.38	87.69	96.92
FIG00469453: hypothetical protein	fig|6666666.157468.peg.978	100	100	100	99.31	99.31	99.31	99.31	99.31	99.31	98.61	99.31	99.31	99.31	99.31	99.31	99.31	99.31	99.31	100	99.31	97.22	99.31
FIG00469843: hypothetical protein	fig|6666666.157468.peg.980	100	100	100	97.58	97.58	97.58	97.18	97.18	97.18	96.59	97.58	97.58	97.58	97.58	98.65	97.61	97.58	97.58	96.37	97.18	96.37	87.5
FIG00388203: hypothetical protein	fig|6666666.157468.peg.994	100	100	100	98.98	98.98	98.98	99.11	99.11	99.11	99.11	99.11	99.11	98.98	99.11	99.37	98.6	98.98	99.11	99.37	99.11	98.73	69.92
FIG00545237: hypothetical protein	fig|6666666.157468.peg.995	100	100	100	100	100	100	100	100	100	100	100	100	100	100	100	98.27	100	100	100	100	96.53	64.94
FIG00638667: hypothetical protein	fig|6666666.157468.peg.997	100	100	100	98.61	98.61	98.61	97.22	97.22	97.22	97.22	97.22	97.22	97.22	97.22	98.61	97.22	97.22	97.22	97.22	98.61	95.83	85.29
hypothetical protein probably associated with Carbamoyl-phosphate synthase	fig|6666666.157468.peg.1006	100	100	100	100	100	100	100	100	100	100	100	100	100	100	100	100	100	100	99.45	100	100	87.98
FIG00638667: hypothetical protein	fig|6666666.157468.peg.1007	100	100	100	100	100	100	98.84	98.84	98.84	98.84	99.42	99.42	99.42	99.42	100	100	99.42	99.42	100	100	98.26	87.79
FIG00469556: hypothetical protein	fig|6666666.157468.peg.1008	100	100	100	99.3	99.3	99.3	99.3	99.3	99.3	99.3	98.59	98.59	99.3	99.3	99.3	99.3	99.3	99.3	99.3	99.3	95.07	100
FIG00626672: hypothetical protein	fig|6666666.157468.peg.1011	100	100	100	98.67	98.67	98.67	98.67	98.67	98.67	98.67	100	100	100	100	98.67	100	100	98.67	98.67	98.67	97.33	92
hypothetical protein Cj1505c	fig|6666666.157468.peg.1016	100	100	100	99.47	99.47	99.47	99.47	99.47	99.47	99.47	99.47	99.47	99.47	99.47	98.95	99.47	99.47	99.47	99.47	98.95	97.89	77.37
hypothetical protein	fig|6666666.157468.peg.1038	100	100	100	0	0	0	0	0	100	0	0	0	0	0	0	0	0	0	0	0	0	0
hypothetical protein	fig|6666666.157468.peg.1055	100	100	100	0	0	0	0	0	0	0	0	0	0	0	0	0	0	0	0	0	0	0
hypothetical protein	fig|6666666.157468.peg.1058	100	100	100	0	0	0	0	0	0	0	0	0	0	0	0	0	0	0	0	0	0	0
hypothetical protein	fig|6666666.157468.peg.1061	100	100	100	0	0	0	0	0	0	0	0	0	0	0	0	0	0	0	0	0	0	0
FIG00469759: hypothetical protein	fig|6666666.157468.peg.1068	100	100	100	99.28	99.28	99.28	0	0	100	0	0	0	0	0	0	100	0	0	98.55	98.56	0	0
FIG00471635: hypothetical protein	fig|6666666.157468.peg.1077	100	31.17	0	0	0	0	40	40	31.17	40	40	40	98.85	0	0	0	0	0	0	0	93.1	0
hypothetical protein	fig|6666666.157468.peg.1079	100	100	100	0	0	0	0	0	0	0	0	0	0	97.14	0	0	0	0	0	0	0	0
hypothetical protein	fig|6666666.157468.peg.1084	100	0	0	100	100	100	0	100	100	100	0	0	0	0	0	0	0	0	0	100	0	0
FIG00469696: hypothetical protein	fig|6666666.157468.peg.1090	100	100	100	98.23	98.23	98.23	100	100	100	100	100	100	100	100	96.46	96.46	100	100	96.46	96.46	95.58	86.73
FIG00469412: hypothetical protein	fig|6666666.157468.peg.1117	100	100	100	100	100	100	98.77	98.77	98.77	98.77	98.77	98.77	98.77	98.77	100	100	98.77	98.77	100	100	100	97.53
FIG00469640: hypothetical protein	fig|6666666.157468.peg.1118	100	100	100	100	100	100	99.39	99.39	99.39	99.39	99.39	99.39	99.39	99.39	100	100	99.18	99.39	100	99.39	95.06	75.3
FIG00469690: hypothetical protein	fig|6666666.157468.peg.1122	100	100	100	98.97	98.97	98.97	99.32	99.32	99.32	99.32	99.32	99.32	99.32	99.32	98.97	98.63	99.32	99.32	96.58	97.95	96.34	83.74
FIG00470444: hypothetical protein	fig|6666666.157468.peg.1124	100	100	100	72.38	72.38	72.38	91.67	91.67	91.67	91.99	91.67	91.67	89.29	91.67	94.65	72.67	91.67	90.48	65.78	91.3	89.36	87.41
FIG00469647: hypothetical protein	fig|6666666.157468.peg.1130	100	100	100	98.55	98.55	98.55	99.03	99.03	99.03	99.03	99.03	99.03	99.03	99.03	98.55	99.68	99.03	99.03	99.52	98.38	99.19	73.75
FIG00470444: hypothetical protein	fig|6666666.157468.peg.1144	100	100	100	89.1	89.1	89.1	81.53	81.53	81.53	68.09	81.53	81.53	81.53	81.53	84.62	84.48	81.53	81.53	89.1	86.54	86.18	79.89
FIG00470444: hypothetical protein	fig|6666666.157468.peg.1145	100	100	100	65.4	65.4	65.4	82.86	82.86	82.86	82.86	82.86	82.86	82.86	82.86	82.86	89.1	82.86	82.86	59.13	86.67	67.74	82.86
FIG00469724: hypothetical protein	fig|6666666.157468.peg.1150	100	100	100	98.54	98.54	98.54	99.51	99.51	99.51	99.51	99.51	99.51	99.51	99.51	98.54	98.54	99.51	99.51	98.54	99.01	95.61	79.51
hypothetical protein	fig|6666666.157468.peg.1157	100	100	100	99.28	99.28	99.28	99.28	99.28	99.28	99.28	99.28	99.28	99.28	99.28	100	100	99.28	99.28	100	100	99.28	72.79
FIG00387915: hypothetical protein	fig|6666666.157468.peg.1164	100	100	100	97.76	97.76	97.76	97.76	97.76	97.76	97.76	97.76	97.76	97.76	97.76	99.36	99.04	97.76	97.76	99.04	98.72	97.44	68.05
FIG00469370: hypothetical protein	fig|6666666.157468.peg.1166	100	100	100	100	100	100	100	100	100	100	100	100	100	100	95.38	95.38	100	100	95.38	98.46	96.92	86.15
FIG00469420: hypothetical protein	fig|6666666.157468.peg.1175	100	100	100	98.14	98.14	98.14	91.52	91.66	91.52	91.52	91.38	91.38	91.52	91.38	89.05	99.15	91.52	91.52	88.92	97.58	96.99	74.87
FIG00711847: hypothetical protein	fig|6666666.157468.peg.1180	100	100	100	98.26	98.26	98.26	99.13	99.13	99.13	99.13	99.13	99.13	99.13	100	100	100	99.13	100	100	99.13	96.52	80.87
FIG00470117: hypothetical protein	fig|6666666.157468.peg.1185	100	100	100	43.36	43.36	43.36	43.36	43.36	43.36	43.36	43.36	43.36	48.23	100	100	44.25	43.36	43.36	99.3	98.59	94.74	0
hypothetical protein	fig|6666666.157468.peg.1199	100	100	100	100	100	100	93.48	93.48	93.48	93.48	100	100	93.48	100	93.48	93.48	93.48	100	93.48	100	0	60.87
FIG00638667: hypothetical protein	fig|6666666.157468.peg.1200	100	100	100	100	100	100	99.05	99.05	99.05	99.05	99.05	99.05	99.05	100	99.05	99.05	99.05	100	99.52	99.05	97.98	80.95
FIG00469466: hypothetical protein	fig|6666666.157468.peg.1201	100	100	100	100	100	100	98.75	98.75	98.75	98.75	98.75	98.75	98.75	100	98.75	98.75	98.75	100	98.75	100	96.25	83.75
FIG00638667: hypothetical protein	fig|6666666.157468.peg.1212	100	100	100	99.38	99.38	99.38	98.77	98.77	98.77	98.77	98.77	98.77	98.77	98.77	99.38	99.38	98.77	98.77	99.38	99.38	98.15	82.1
FIG00638667: hypothetical protein	fig|6666666.157468.peg.1226	100	100	100	99.38	99.38	99.38	99.38	99.38	99.38	99.38	99.38	99.38	99.38	99.38	98.77	98.46	99.38	99.38	98.77	98.46	98.77	87.69
hypothetical protein	fig|6666666.157468.peg.1227	100	100	100	97.37	97.37	97.37	100	100	100	0	100	100	100	0	0	97.37	100	100	0	0	0	0
FIG00638667: hypothetical protein	fig|6666666.157468.peg.1228	100	100	100	100	100	100	100	100	100	100	100	100	100	100	97.3	98.65	100	100	97.3	98.65	42.07	73.12
FIG00638667: hypothetical protein	fig|6666666.157468.peg.1230	100	100	100	100	100	100	100	100	100	100	100	100	100	100	40.69	100	100	100	96	100	95.33	62.67
FIG00469610: hypothetical protein	fig|6666666.157468.peg.1236	100	100	100	100	100	100	100	100	100	100	100	100	100	97.83	97.83	100	100	100	100	97.83	95.65	91.3
FIG00469510: hypothetical protein	fig|6666666.157468.peg.1259	100	100	100	99.21	99.21	99.21	99.21	99.21	99.21	99.21	99.21	99.21	99.21	99.21	99.21	99.21	99.21	99.21	99.21	99.21	98.41	49.19
FIG00638667: hypothetical protein	fig|6666666.157468.peg.1264	100	100	100	99.59	99.59	99.59	99.18	99.18	99.18	99.18	99.18	99.18	99.18	99.18	97.54	96.72	99.18	99.18	96.31	99.59	96.31	72.73
FIG00545237: hypothetical protein	fig|6666666.157468.peg.1266	100	100	100	98.88	98.88	98.88	98.66	98.66	98.66	98.66	98.66	98.66	98.66	98.66	99.11	98.21	98.66	98.66	98.21	99.11	96.83	75.31
FIG00545237: hypothetical protein	fig|6666666.157468.peg.1270	100	100	100	97.92	97.92	97.92	97.22	97.22	97.22	97.22	96.53	96.53	97.22	97.22	97.22	97.22	97.22	97.22	97.22	97.22	96.53	79.31
FIG00638667: hypothetical protein	fig|6666666.157468.peg.1286	100	100	100	98.99	98.99	98.99	99.24	99.24	99.24	99.24	99.24	99.24	99.24	99.24	99.24	99.24	99.24	99.24	98.99	99.49	96.72	79.15
FIG00638667: hypothetical protein	fig|6666666.157468.peg.1288	100	100	100	91.3	91.3	91.3	0	0	0	0	0	0	0	0	0	87.04	0	0	87.04	0	0	0
FIG00638667: hypothetical protein	fig|6666666.157468.peg.1289	100	100	100	97.3	97.3	97.3	95.96	95.96	95.96	95.96	95.96	95.96	95.96	95.96	100	96.13	95.96	95.96	96	0	0	40.91
FIG00638667: hypothetical protein	fig|6666666.157468.peg.1290	100	100	100	97.2	97.2	97.2	95.39	95.39	95.39	95.39	95.39	95.39	95.39	95.39	98.27	96.89	95.39	95.39	100	0	0	33.33
hypothetical protein	fig|6666666.157468.peg.1291	100	100	100	0	0	0	0	0	0	0	0	0	0	0	0	0	0	0	0	97.3	0	0
FIG00469439: hypothetical protein	fig|6666666.157468.peg.1293	100	100	100	0	0	0	96.33	96.33	96.33	96.33	96.33	96.33	96.33	98.17	55.94	0	96.33	96.33	55.94	98.3	0	0
FIG00470257: hypothetical protein	fig|6666666.157468.peg.1294	100	100	100	0	0	0	98.21	98.21	98.21	98.21	98.21	98.21	98.21	94.64	0	0	98.21	98.21	0	96.43	0	0
FIG00545237: hypothetical protein	fig|6666666.157468.peg.1299	100	100	100	100	100	100	98.25	98.25	98.25	98.25	100	100	98.25	98.25	98.25	100	98.25	98.25	98.25	100	96.49	87.72
FIG00469386: hypothetical protein	fig|6666666.157468.peg.1313	100	100	100	99.39	99.39	99.39	99.39	99.39	99.39	99.39	99.39	99.39	99.39	99.39	98.77	98.77	99.39	99.39	98.77	98.77	97.55	82.21
FIG00638667: hypothetical protein	fig|6666666.157468.peg.1318	100	100	100	99.47	99.47	99.47	99.47	99.47	99.47	99.47	99.47	99.47	99.47	99.47	98.95	99.47	99.47	99.47	99.47	99.47	96.32	71.58
FIG00638667: hypothetical protein	fig|6666666.157468.peg.1324	100	100	100	99.28	99.28	99.28	99.28	99.28	99.28	99.28	99.28	99.28	99.28	99.28	94.2	94.93	99.28	99.28	94.2	99.28	92.75	75.36
hypothetical protein	fig|6666666.157468.peg.1365	100	100	100	0	0	0	0	0	0	0	0	0	0	0	0	0	0	100	0	0	0	100
FIG00469579: hypothetical protein	fig|6666666.157468.peg.1369	100	100	100	100	100	100	100	100	100	100	99.04	99.04	100	100	100	100	100	100	100	100	0	94.74
FIG00638667: hypothetical protein	fig|6666666.157468.peg.1408	100	100	100	95.22	95.22	95.22	94.02	94.02	94.02	94.02	95.22	95.22	94.02	0	96.02	97.21	94.02	93.56	97.21	96.81	90.84	63.35
FIG00469414: hypothetical protein	fig|6666666.157468.peg.1414	100	100	100	100	100	100	100	100	100	100	100	100	100	100	98.51	100	100	100	100	100	100	89.55
FIG00638667: hypothetical protein	fig|6666666.157468.peg.1415	100	100	100	100	100	100	100	100	100	100	100	100	100	100	98.64	99.09	100	100	98.64	99.55	95.45	0
FIG00638667: hypothetical protein	fig|6666666.157468.peg.1417	100	100	100	100	100	100	100	100	100	100	84.06	84.06	99.28	100	84.44	0	99.28	100	0	89.11	87.76	0
FIG00470447: hypothetical protein	fig|6666666.157468.peg.1427	100	100	100	62.67	62.67	62.67	62.67	54.05	62.67	62.67	62.67	62.67	62.67	0	74.65	79.31	0	0	0	0	0	0
FIG00469787: hypothetical protein	fig|6666666.157468.peg.1428	100	100	100	100	100	100	100	100	100	100	100	100	100	100	96.67	96.67	100	100	96.67	96.67	93.33	78.33
FIG00469751: hypothetical protein	fig|6666666.157468.peg.1434	100	100	100	98.8	98.8	98.8	100	100	100	100	98.19	98.19	98.19	98.19	98.19	98.8	98.19	98.19	100	98.19	95.65	77.11
FIG00545237: hypothetical protein	fig|6666666.157468.peg.1435	100	100	100	98.92	98.43	98.92	100	99.48	99.48	100	98.99	98.99	98.99	98.99	98.49	98.49	98.99	98.99	100	97.49	96.48	51.27
FIG00638667: hypothetical protein	fig|6666666.157468.peg.1441	100	100	100	99.45	99.45	99.45	99.18	99.18	99.18	99.18	98.9	98.9	98.9	98.9	99.73	99.73	98.9	98.9	99.73	100	97.8	83.06
FIG000557: hypothetical protein co-occurring with RecR	fig|6666666.157468.peg.1442	100	100	100	100	100	100	100	100	100	100	100	100	100	100	100	100	100	100	99.03	100	99.03	96.97
FIG00469423: hypothetical protein	fig|6666666.157468.peg.1444	100	100	100	100	100	100	99.45	99.45	99.45	99.45	100	100	100	100	99.45	99.45	100	100	99.45	100	97.81	81.08
FIG00638667: hypothetical protein	fig|6666666.157468.peg.1447	100	100	100	99.09	99.09	99.09	99.09	99.09	99.09	99.09	99.39	99.39	99.39	99.39	99.7	99.7	99.39	99.39	99.39	99.7	98.17	79.88
FIG00469530: hypothetical protein	fig|6666666.157468.peg.1453	100	100	100	97.23	97.23	97.23	96.89	96.89	96.89	96.89	100	100	98.96	98.96	95.85	96.54	98.96	98.96	96.89	93.01	95.85	91.7
FIG00469595: hypothetical protein	fig|6666666.157468.peg.1458	100	100	100	98.38	98.38	98.38	99.19	99.19	99.19	99.19	98.38	98.38	97.98	98.38	97.57	97.57	98.38	98.44	97.57	98.38	0	77.69
FIG00638667: hypothetical protein	fig|6666666.157468.peg.1459	100	100	100	100	100	100	97.83	97.83	97.83	97.83	99.28	99.28	99.28	99.28	95.16	95.16	99.28	99.28	95.16	99.28	85.71	75.2
FIG00638667: hypothetical protein	fig|6666666.157468.peg.1464	100	100	100	99.2	99.2	99.2	99.6	99.6	99.6	99.6	98.4	98.4	98	98.4	99.2	99.2	98.4	98.4	99.2	97.6	96.94	68.65
FIG00469898: hypothetical protein	fig|6666666.157468.peg.1467	100	100	100	97.19	97.19	97.19	98.6	98.6	98.6	98.6	98.25	98.25	98.6	98.25	97.54	96.84	98.6	98.25	97.54	0	95.67	76.19
FIG00469766: hypothetical protein	fig|6666666.157468.peg.1483	100	100	100	89.94	89.94	89.94	90.25	90.25	90.25	90.25	90.25	90.25	90.25	90.25	83.96	83.96	90.25	90.25	83.96	100	0	0
FIG00470200: hypothetical protein	fig|6666666.157468.peg.1500	100	100	100	0	0	0	0	0	0	0	0	0	0	0	95.97	0	0	0	95.97	0	0	0
FIG00469845: hypothetical protein	fig|6666666.157468.peg.1518	100	100	100	100	100	100	100	100	100	100	100	100	100	100	99.57	96.09	100	100	98.26	99.57	96.52	80.43
FIG00470987: hypothetical protein	fig|6666666.157468.peg.1528	100	0	0	0	0	0	0	0	100	0	0	0	0	0	0	0	0	0	0	0	0	0
hypothetical protein	fig|6666666.157468.peg.1529	100	0	0	0	0	0	0	0	100	0	0	0	0	0	0	0	0	0	0	0	0	0
FIG00470940: hypothetical protein	fig|6666666.157468.peg.1530	100	0	100	0	0	100	97.87	97.87	97.87	97.87	97.87	97.87	0	0	0	95.74	50	95.74	0	95.74	0	0
FIG022708: hypothetical protein	fig|6666666.157468.peg.1550	100	100	100	99.02	99.02	99.02	100	100	100	100	97.07	97.07	100	100	97.56	97.56	100	99.02	97.07	98.54	97.56	80
FIG00469761: hypothetical protein	fig|6666666.157468.peg.1565	100	100	100	65.38	65.38	65.38	100	100	100	100	100	100	100	100	64.62	64.62	100	100	100	64.62	93.23	65.38
FIG00469432: hypothetical protein	fig|6666666.157468.peg.1586	100	100	100	99.75	99.75	99.75	99.5	99.5	99.5	99.5	99.5	99.5	99.5	99.5	99.5	98.99	99.5	99.5	98.99	99.5	96.98	57
FIG00469629: hypothetical protein	fig|6666666.157468.peg.1594	100	100	100	100	100	100	99.15	99.15	99.15	99.15	99.13	99.13	99.15	99.15	99.15	99.15	99.15	99.15	100	100	99.15	85.47
hypothetical protein	fig|6666666.157468.peg.1607	100	100	100	100	100	100	100	100	100	100	100	100	100	100	100	100	100	100	100	100	100	0
FIG00469484: hypothetical protein	fig|6666666.157468.peg.1626	100	100	100	96.39	96.39	96.39	96.39	96.39	96.39	96.39	96.39	96.39	96.39	96.39	96.39	93.98	96.39	96.39	96.39	96.39	93.98	75.9
FIG001943: hypothetical protein YajQ	fig|6666666.157468.peg.1636	100	100	100	98.77	98.77	98.77	98.16	98.16	98.16	98.16	98.16	98.16	98.16	98.16	98.77	100	98.16	98.16	98.77	100	98.16	90.8
FIG00545237: hypothetical protein	fig|6666666.157468.peg.1637	100	100	100	96.84	96.84	96.84	97.47	97.47	97.47	97.47	96.84	96.84	97.47	97.47	96.2	100	97.47	97.47	98.1	100	94.94	65.97
FIG00638667: hypothetical protein	fig|6666666.157468.peg.1638	100	100	100	98.18	98.18	98.18	97.81	97.81	97.81	97.81	97.81	97.81	97.81	97.81	97.81	97.81	97.81	97.45	99.27	98.54	97.45	0
FIG00469705: hypothetical protein	fig|6666666.157468.peg.1642	100	100	100	98.87	98.87	98.87	99.25	99.25	98.85	98.85	99.49	99.49	99.25	99.25	0	99.25	99.25	99.25	0	98.12	0	87.12
FIG00470210: hypothetical protein	fig|6666666.157468.peg.1653	100	100	100	99.05	99.05	99.05	97.63	97.63	97.63	97.63	97.63	97.63	97.63	97.63	98.58	98.1	97.63	97.63	98.1	99.05	95.26	75.62
FIG00469601: hypothetical protein	fig|6666666.157468.peg.1657	100	100	100	100	100	100	98.96	98.96	98.96	98.96	98.96	98.96	98.96	98.96	96.88	97.92	98.96	98.96	97.92	98.96	100	53.76
FIG01270615: hypothetical protein	fig|6666666.157468.peg.1658	100	100	100	99.1	99.1	99.1	98.49	98.49	98.49	98.49	98.49	98.49	98.49	98.49	98.49	98.19	98.49	98.19	98.49	98.8	97.59	73.19
FIG00469797: hypothetical protein	fig|6666666.157468.peg.1659	100	100	100	97.4	97.4	97.4	97.92	97.92	97.92	97.92	97.92	97.92	97.92	97.92	96.35	97.92	97.92	97.92	97.92	100	96.88	64.06
FIG00469546: hypothetical protein	fig|6666666.157468.peg.1665	100	100	100	100	100	100	100	100	100	100	100	100	100	100	100	100	100	100	100	100	98.87	96.13
FIG00545237: hypothetical protein	fig|6666666.157468.peg.1668	100	100	100	99.33	99.33	99.33	99	99	99	99	98.66	98.66	98.66	98.66	97.32	99	98.66	98.66	99.33	99.67	97.32	74.17
FIG00638667: hypothetical protein	fig|6666666.157468.peg.1675	100	100	100	97.44	97.44	97.44	97.44	97.44	97.44	97.44	96.58	96.58	96.58	96.58	96.15	99.15	96.58	96.58	96.15	99.57	96.15	70.09
FIG00471287: hypothetical protein	fig|6666666.157468.peg.1676	100	100	100	100	100	100	100	100	100	100	100	100	100	100	100	98.76	100	100	100	98.76	87.5	0
FIG00470444: hypothetical protein	fig|6666666.157468.peg.1678	100	100	100	85.35	96.23	96.23	0	0	0	0	0	0	0	0	0	41.18	0	0	0	42.11	67.11	84.71
FIG00638667: hypothetical protein	fig|6666666.157468.peg.1681	100	100	100	97.89	97.89	97.89	100	100	100	100	100	100	100	100	98.42	100	100	100	98.42	100	95.79	86.84
FIG00638667: hypothetical protein	fig|6666666.157468.peg.1686	100	100	100	100	100	100	99.28	99.28	99.28	99.28	99.28	99.28	99.28	99.28	0	100	99.28	99.28	0	0	0	0
FIG00469522: hypothetical protein	fig|6666666.157468.peg.1688	100	100	100	100	100	100	100	100	100	100	100	100	100	100	100	100	100	100	100	100	100	93.64
FIG00469840: hypothetical protein	fig|6666666.157468.peg.1689	100	100	100	99.21	99.21	99.21	99.21	99.21	99.21	99.21	99.21	99.21	99.21	99.21	95.65	98.43	99.21	99.21	95.65	96.52	96.55	69.29
hypothetical protein	fig|6666666.157468.peg.1695	100	0	0	0	0	0	0	0	97.3	0	0	0	0	0	0	0	0	0	0	0	0	0
FIG00470890: hypothetical protein	fig|6666666.157468.peg.1696	100	100	100	95.91	95.91	95.91	100	100	100	100	99.43	99.43	99.43	98.83	0	0	98.83	98.83	0	98.83	0	0
FIG00470890: hypothetical protein	fig|6666666.157468.peg.1697	100	100	100	96.77	96.77	96.77	98.39	98.39	98.39	98.39	96.77	96.77	95.97	96.77	0	0	96.77	96.77	0	96.77	0	0
FIG00470890: hypothetical protein	fig|6666666.157468.peg.1698	100	100	100	97.94	97.94	97.94	94.74	94.74	94.74	94.74	94.74	94.74	98.77	94.74	0	0	98.97	93.86	0	94.74	0	0
FIG00469895: hypothetical protein	fig|6666666.157468.peg.1703	100	100	100	99.11	99.11	99.11	99.78	99.78	99.78	99.78	99.78	99.78	99.78	99.55	100	98.89	98.89	99.55	99.55	99.78	99.11	99.33
FIG00470053: hypothetical protein	fig|6666666.157468.peg.1707	100	100	100	99.07	99.07	99.07	97.2	97.2	97.2	97.2	97.2	97.2	98.13	99.07	98.13	98.13	98.13	99.07	99.07	99.07	94.85	71.96
FIG00470070: hypothetical protein	fig|6666666.157468.peg.1711	100	100	100	100	100	100	99.6	99.6	99.6	99.6	98.79	98.79	100	98.99	93.74	99.19	100	99.19	98.79	98.99	91.72	0
FIG00470671: hypothetical protein	fig|6666666.157468.peg.1720	100	100	100	50.84	50.84	50.84	50.84	49.72	50.84	50.84	50.84	50.84	50.84	50.84	48.48	38.94	50.84	53.79	48.48	98.08	48.21	58.56
FIG00470281: hypothetical protein	fig|6666666.157468.peg.1721	100	100	100	41.15	41.15	41.15	40.21	41.23	40.21	40.21	34.06	34.06	40.21	34.06	41.12	0	40.21	34.06	41.12	98.89	94.29	83.33
FIG00638667: hypothetical protein	fig|6666666.157468.peg.1722	100	100	100	95.92	95.92	95.92	93.28	93.28	93.28	93.28	81.25	81.25	93.28	94.12	87.76	0	93.28	94.12	87.76	100	94.12	98.32
FIG00638667: hypothetical protein	fig|6666666.157468.peg.1723	100	100	100	96.34	96.34	96.34	97.56	97.56	97.56	97.56	96.34	96.34	97.56	96.34	96.34	0	97.56	97.83	96.34	98.78	96.34	96.34
FIG00638667: hypothetical protein	fig|6666666.157468.peg.1724	100	100	100	96.9	96.9	96.9	95.11	95.11	95.11	95.11	95.65	95.65	95.11	96.2	96.9	0	95.11	96.2	95.65	98.91	97.28	95.11
FIG00469778: hypothetical protein	fig|6666666.157468.peg.1735	100	100	100	99.13	99.13	99.13	99.71	99.71	99.71	99.71	99.71	99.71	99.71	99.71	99.71	99.42	99.71	99.71	99.71	98.74	90.91	94.74
FIG00469817: hypothetical protein	fig|6666666.157468.peg.1736	100	0	100	0	0	0	0	0	0	0	0	0	0	95.35	0	0	0	0	0	100	95.35	72.09
FIG00545237: hypothetical protein	fig|6666666.157468.peg.1754	100	100	100	97.57	97.57	97.57	99.34	99.34	99.34	99.34	99.34	99.34	99.34	99.34	97.57	97.79	99.34	99.34	97.57	96.25	0	49.78
FIG00545237: hypothetical protein	fig|6666666.157468.peg.1755	100	100	100	96.72	96.72	96.72	97.54	97.54	97.54	97.54	97.54	97.54	97.54	97.54	96.72	97.54	97.54	97.54	96.72	96.72	0	0
FIG00545237: hypothetical protein	fig|6666666.157468.peg.1756	100	100	100	99.03	99.03	99.03	99.52	99.52	99.52	99.52	99.52	99.52	99.52	99.52	99.03	99.52	99.52	99.52	99.03	99.52	0	79.23
FIG00638667: hypothetical protein	fig|6666666.157468.peg.1757	100	100	100	99.1	99.1	99.1	99.33	99.33	99.33	99.33	99.55	99.55	99.31	99.33	99.1	99.55	99.33	99.55	99.1	99.33	94.92	0
FIG00638667: hypothetical protein	fig|6666666.157468.peg.1758	100	100	100	96.75	96.75	96.75	97.25	97.25	97.25	97.25	97.25	97.25	97.25	97.25	96.5	98.25	97.25	97.25	96.75	97.25	91.04	29.41
FIG00469965: hypothetical protein	fig|6666666.157468.peg.1785	100	100	100	96.08	96.08	96.08	96.57	96.57	96.57	96.57	96.57	96.57	96.57	96.57	95.59	96.08	96.57	96.57	96.57	96.57	95.59	86.27
FIG00470444: hypothetical protein	fig|6666666.157468.peg.1787	100	100	100	0	0	0	0	0	44.62	0	0	0	0	0	0	29.55	0	0	0	53.25	0	89.19
FIG00470444: hypothetical protein	fig|6666666.157468.peg.1788	100	100	100	73.56	62.18	62.18	62.18	62.18	62.18	62.18	62.18	62.18	62.18	62.18	59.83	0	62.18	62.18	59.83	82.69	86.84	77.78
hypothetical protein Cj0135	fig|6666666.157468.peg.1801	100	100	100	100	100	100	100	100	100	100	100	100	100	100	100	96.92	100	100	95.38	100	89.61	63.64
FIG00470474: hypothetical protein	fig|6666666.157468.peg.1806	100	100	100	99.1	99.1	99.1	99.32	99.32	99.32	99.32	97.51	97.51	99.32	97.29	100	97.83	99.32	98.92	98.65	98.64	98.43	0
hypothetical protein	fig|6666666.157468.peg.1811	100	0	97.5	0	0	0	97.5	97.5	97.5	97.5	97.5	97.5	0	0	0	97.5	0	97.5	0	95	0	0
FIG00638667: hypothetical protein	fig|6666666.157468.peg.1813	100	0	0	0	0	0	0	0	0	0	0	0	0	0	0	93.33	0	0	93.33	0	0	0
FIG00471707: hypothetical protein	fig|6666666.157468.peg.1814	100	100	100	91.63	91.63	91.63	91.21	91.21	91.21	91.21	92.05	92.05	91.21	91.63	92.89	90.79	91.21	91.63	92.89	73.84	88.7	68.09
FIG00469373: hypothetical protein	fig|6666666.157468.peg.1821	100	100	100	99.47	99.47	99.47	99.74	99.74	99.74	99.74	99.74	99.74	99.74	99.74	99.47	99.47	99.74	99.74	99.21	99.74	97.35	88.89
FIG00469877: hypothetical protein	fig|6666666.157468.peg.1822	100	100	100	96.55	96.55	96.55	97.7	97.7	97.7	97.7	97.7	97.7	97.7	97.7	96.55	97.7	97.7	97.7	97.7	98.85	93.1	78.16
FIG00469742: hypothetical protein	fig|6666666.157468.peg.1826	100	100	100	99.37	99.37	99.37	99.37	99.37	99.37	99.37	99.37	99.37	99.37	99.37	100	100	99.37	99.37	100	100	98.73	86.02
FIG00470425: hypothetical protein	fig|6666666.157468.peg.1828	100	100	100	95.19	95.19	95.19	99.05	99.05	99.05	99.05	99.05	99.05	99.05	98.98	94.29	96.3	99.05	99.05	98.1	0	0	0
FIG00469687: hypothetical protein	fig|6666666.157468.peg.1832	100	100	100	98.97	98.97	98.97	99.23	99.23	99.23	99.23	99.23	99.23	99.23	99.23	98.71	98.45	99.23	99.23	98.97	100	98.45	77.06
FIG00470664: hypothetical protein	fig|6666666.157468.peg.1857	100	100	100	98.46	98.46	98.46	100	100	100	100	100	100	100	0	98.46	98.46	100	100	98.46	98.46	0	0
FIG00470064: hypothetical protein	fig|6666666.157468.peg.1858	100	100	100	93.14	93.14	93.14	100	100	100	100	98.25	98.25	100	0	96.4	97.71	100	92.98	97.14	97.12	87.72	0
hypothetical protein	fig|6666666.157468.peg.1859	100	100	100	100	100	100	100	100	100	100	100	100	100	0	100	100	100	94.87	100	100	0	0
FIG00469431: hypothetical protein	fig|6666666.157468.peg.1866	100	100	100	98.84	98.84	98.84	99.12	99.12	99.12	99.12	99.12	99.12	99.12	99.12	98.59	96.26	99.12	99.12	99.12	96.26	0	0
FIG00638667: hypothetical protein	fig|6666666.157468.peg.1868	100	100	100	97.39	97.39	97.39	100	100	100	100	100	100	100	100	99.13	98.26	100	100	100	99.13	97.39	70.94
FIG00638667: hypothetical protein	fig|6666666.157468.peg.1869	100	100	100	96.27	96.27	96.27	100	100	100	100	100	100	100	100	96.8	97.33	100	100	97.6	97.07	98.93	39.07
FIG00638667: hypothetical protein	fig|6666666.157468.peg.1898	100	100	100	98.33	98.33	98.33	98.33	98.33	98.33	98.33	98.33	98.33	98.33	90	98.33	98.33	98.33	98.33	98.33	100	97.3	0
FIG00469824: hypothetical protein	fig|6666666.157468.peg.1902	100	100	100	100	100	100	100	100	100	100	99.39	99.39	100	100	99.39	99.39	100	100	100	99.39	99.39	81.71
FIG00638667: hypothetical protein	fig|6666666.157468.peg.1903	100	100	100	99.42	99.42	99.42	100	100	100	100	100	100	100	100	100	100	100	100	100	100	97.08	83.72
FIG00638667: hypothetical protein	fig|6666666.157468.peg.1914	100	100	100	99.63	99.63	99.63	98.88	98.88	98.88	98.88	99.63	99.63	98.88	98.88	99.63	98.51	98.88	98.88	99.63	98.88	99.25	75
hypothetical protein	fig|6666666.157468.peg.1925	100	100	100	0	0	0	0	0	0	0	0	0	0	0	0	0	0	0	0	0	87.83	0
hypothetical protein	fig|6666666.157468.peg.1926	100	100	100	0	0	0	0	0	0	0	0	0	0	0	0	0	0	0	0	0	96.94	0
hypothetical protein	fig|6666666.157468.peg.1929	100	100	100	0	0	0	0	0	0	0	0	0	0	0	0	0	0	0	0	0	98.5	0
hypothetical protein	fig|6666666.157468.peg.1936	100	100	100	0	0	0	0	0	0	0	0	0	0	0	0	0	0	0	0	0	65.52	0
hypothetical protein	fig|6666666.157468.peg.1937	100	100	100	0	0	0	0	0	0	0	0	0	0	0	0	0	0	0	0	0	0	0
hypothetical protein	fig|6666666.157468.peg.1938	100	100	100	0	0	0	0	0	0	0	0	0	0	0	0	0	0	0	0	0	0	0
hypothetical protein	fig|6666666.157468.peg.1940	100	100	100	0	0	0	0	0	0	0	0	0	0	0	0	0	0	0	0	0	0	0
hypothetical protein	fig|6666666.157468.peg.1941	100	100	100	0	0	0	0	0	0	0	0	0	0	0	0	0	0	0	0	79.55	0	80
hypothetical protein	fig|6666666.157468.peg.1942	100	100	100	0	0	0	0	0	0	0	0	0	0	0	0	0	0	0	0	0	0	0
hypothetical protein	fig|6666666.157468.peg.1943	100	100	100	0	0	0	0	100	0	0	0	0	0	0	0	0	0	0	0	0	0	0
hypothetical protein	fig|6666666.157468.peg.1944	100	100	100	0	0	0	0	0	0	0	0	0	0	0	0	0	0	0	0	0	0	0
hypothetical protein	fig|6666666.157468.peg.1945	100	100	100	0	0	0	0	0	0	0	0	0	0	0	0	0	0	0	0	0	0	0
hypothetical protein	fig|6666666.157468.peg.1946	100	100	100	0	0	0	0	0	0	0	0	100	0	0	0	0	0	0	0	0	0	0
hypothetical protein	fig|6666666.157468.peg.1947	100	100	100	0	0	0	0	0	0	0	0	0	0	0	0	0	0	0	0	0	0	0
hypothetical protein	fig|6666666.157468.peg.1948	100	100	100	0	0	0	46.77	46.77	46.77	46.77	46.77	46.77	48	0	85.07	0	0	0	0	0	0	0
hypothetical protein	fig|6666666.157468.peg.1949	100	100	100	0	0	0	31.82	31.01	31.82	31.82	31.82	31.82	0	0	0	0	0	0	0	0	0	0
hypothetical protein	fig|6666666.157468.peg.1950	100	100	100	0	0	0	0	0	0	0	0	0	0	0	0	0	0	0	0	0	0	0
hypothetical protein	fig|6666666.157468.peg.1951	100	100	100	0	0	0	0	0	0	0	0	0	0	0	0	0	0	0	0	0	0	0
hypothetical protein	fig|6666666.157468.peg.1953	100	100	100	0	0	0	0	0	0	0	0	0	0	0	0	0	0	0	0	0	0	0
FIG00469626: hypothetical protein	fig|6666666.157468.peg.1954	100	100	100	58.54	58.54	58.54	80.12	80.12	80.12	80.12	80.12	80.12	62.05	0	59.15	0	0	0	0	0	0	59.15
hypothetical protein	fig|6666666.157468.peg.1955	100	100	100	0	0	0	98.48	98.48	98.48	98.48	98.48	98.48	95.45	0	53.39	0	0	0	0	0	0	0
hypothetical phage protein, putative	fig|6666666.157468.peg.1956	100	100	100	0	0	0	37.89	37.89	37.89	37.89	37.89	37.89	0	0	0	0	37.89	33.75	0	37.89	71.17	0
hypothetical protein	fig|6666666.157468.peg.1957	100	100	100	0	0	0	0	0	0	0	0	0	0	0	0	0	0	0	0	0	94.12	0
hypothetical protein	fig|6666666.157468.peg.1958	100	100	100	0	0	0	0	0	0	0	0	0	0	0	0	0	0	0	0	98.28	100	0
FIG00470684: hypothetical protein	fig|6666666.157468.peg.1959	100	100	100	0	0	0	0	0	0	0	0	0	0	0	0	0	0	0	0	0	40.7	0
hypothetical protein	fig|6666666.157468.peg.1960	100	100	100	0	0	80.33	0	0	0	0	0	0	0	0	0	0	0	0	0	0	0	0
FIG00469557: hypothetical protein	fig|6666666.157468.peg.1961	100	100	100	90.59	90.59	90.59	89.41	89.41	0	89.41	89.41	89.41	89.41	0	89.41	0	0	0	92.94	0	0	89.41
hypothetical protein	fig|6666666.157468.peg.1962	100	100	100	0	0	0	37.63	37.63	37.63	37.63	37.63	37.63	0	0	0	0	37.63	45.71	0	45.59	38.3	0
FIG00471615: hypothetical protein	fig|6666666.157468.peg.1963	100	100	100	0	0	0	0	0	0	0	0	0	0	0	0	0	0	0	0	77.78	83.87	0
hypothetical protein	fig|6666666.157468.peg.1964	100	100	100	0	0	0	0	0	0	0	0	0	0	0	0	0	0	0	0	0	94.52	0
hypothetical protein	fig|6666666.157468.peg.1965	100	100	100	0	0	0	47.46	53.85	47.46	47.46	47.46	47.46	0	0	0	0	0	0	0	0	62.16	0
hypothetical protein	fig|6666666.157468.peg.1966	100	100	100	0	0	0	0	0	0	0	0	0	0	0	0	0	0	0	0	0	98.74	0
hypothetical protein	fig|6666666.157468.peg.1967	100	100	100	0	0	0	0	0	0	0	0	0	0	0	0	0	0	0	0	0	92.68	100
hypothetical protein	fig|6666666.157468.peg.1968	100	100	100	0	0	0	0	0	0	0	0	0	0	0	0	0	0	0	0	0	0	84.62
hypothetical protein	fig|6666666.157468.peg.1973	100	100	100	0	0	0	0	0	0	0	0	0	0	0	0	0	0	0	0	0	96.5	0
hypothetical protein	fig|6666666.157468.peg.1974	100	100	100	0	0	0	0	0	0	0	0	0	0	0	97.52	0	0	0	0	0	98	0
FIG00471674: hypothetical protein	fig|6666666.157468.peg.1977	100	100	100	0	0	0	0	0	0	0	0	0	0	0	0	0	0	0	0	0	0	95.12
FIG00471674: hypothetical protein	fig|6666666.157468.peg.1978	100	100	100	0	0	0	0	0	0	0	0	0	0	0	0	0	0	0	0	0	0	99.12
hypothetical protein	fig|6666666.157468.peg.1979	100	100	100	0	0	0	0	0	0	0	37.2	37.2	0	0	0	0	0	0	0	0	39.13	0
hypothetical protein	fig|6666666.157468.peg.1980	100	100	100	0	0	0	0	0	95.74	0	0	0	0	0	96.83	98.67	0	0	98.67	0	42.67	98.67
hypothetical protein	fig|6666666.157468.peg.1981	100	100	100	0	0	0	0	0	98.28	0	0	0	0	0	100	100	0	0	100	0	41.8	100
hypothetical protein	fig|6666666.157468.peg.1982	100	100	100	0	0	0	100	0	0	0	0	0	0	0	0	0	0	0	0	0	97.4	97.4
D. ANTIBIOTIC RESISTANCE
Aminoglycoside phosphotransferase	fig|6666666.157468.peg.22	100	100	100	0	0	0	100	100	0	100	0	0	100	0	0	0	0	0	0	0	0	49.02
beta-lactamase (EC 3.5.2.6)	fig|6666666.157468.peg.1562	100	100	100	99.6	99.6	99.6	99.6	99.6	99.6	99.6	99.6	99.6	99.6	99.6	0	0	99.6	99.6	99.21	99.21	0	83.19
putative lactamase B ( Metallo-beta-lactamase superfamily)	fig|6666666.157468.peg.1496	100	100	100	98.49	98.49	98.49	97.96	97.96	97.96	97.96	99.62	99.62	98.49	98.11	99.25	97.84	98.49	98.49	98.87	99.28	91.18	0
Tetracycline resistance protein TetO	fig|6666666.157468.peg.16	100	98.9	98.9	100	100	100	98.9	98.9	99.48	98.9	100	100	98.9	40.14	99.84	38.1	38.1	38.1	98.59	40.14	40.14	100
E. PLASMID OR PHAGE-ASSOCIATED (74)
PLASMID ASSOCIATED
Inner membrane protein of type IV secretion of T-DNA complex, VirB6	fig|6666666.157468.peg.2	100	93.33	93.33	99.7	99.7	99.7	100	100	0	100	100	100	100	0	100	0	0	0	84.64	0	0	84.94
Lipoprotein of type IV secretion complex that spans outer membrane and periplasm, VirB7	fig|6666666.157468.peg.3	100	100	100	100	100	100	98.18	98.18	98.18	98.18	100	100	98.18	0	100	0	0	0	94.55	0	0	94.55
Inner membrane protein forms channel for type IV secretion of T-DNA complex, VirB8	fig|6666666.157468.peg.4	100	100	100	100	100	100	100	100	0	100	100	100	100	0	100	0	0	0	86.67	0	0	86.24
Outer membrane and periplasm component of type IV secretion of T-DNA complex, has secretin-like domain, VirB9	fig|6666666.157468.peg.5	100	100	100	100	100	100	100	100	95	100	100	100	100	0	100	0	0	0	89.23	0	0	89.23
Inner membrane protein forms channel for type IV secretion of T-DNA complex (VirB10)	fig|6666666.157468.peg.6	100	100	100	100	100	100	100	100	99.17	100	99.49	99.49	100	0	99.49	0	0	0	86.04	0	0	81.98
ATPase required for both assembly of type IV secretion complex and secretion of T-DNA complex, VirB11	fig|6666666.157468.peg.7	100	100	100	100	100	100	100	100	30.57	100	100	100	100	31.21	100	0	31.21	31.21	96.05	31.21	31.21	95.44
Coupling protein VirD4, ATPase required for T-DNA transfer	fig|6666666.157468.peg.8	100	99.82	99.82	99.82	99.82	99.82	99.82	99.82	25.31	99.82	99.82	99.82	99.82	0	99.82	0	0	0	94	0	0	94
IncQ plasmid conjugative transfer protein TraQ (RP4 TrbM homolog)	fig|6666666.157468.peg.10	100	100	100	100	100	100	100	100	36.86	100	100	100	100	0	100	0	0	0	67.84	0	0	69.02
hygromycin-B-phosphotransferase	fig|6666666.157468.peg.20	100	99.67	99.67	0	0	0	99.67	99.67	0	99.67	0	0	99.67	0	0	0	0	0	0	0	0	99.67
putative aminoglycoside 6-adenylyltansferase	fig|6666666.157468.peg.21	100	0	0	0	0	0	0	0	0	0	0	0	0	0	0	0	0	0	0	0	0	0
IncQ plasmid conjugative transfer DNA nicking endonuclease TraR (pTi VirD2 homolog)	fig|6666666.157468.peg.33	100	100	100	97.19	97.19	97.19	100	100	0	100	96.97	96.97	100	0	100	0	0	0	97.4	0	0	0
IncQ plasmid conjugative transfer protein TraG	fig|6666666.157468.peg.39	100	84.44	84.44	100	100	100	100	100	0	100	98.85	98.85	100	0	98.85	0	0	0	87.06	0	0	0
IncP-type DNA transfer protein TraL	fig|6666666.157468.peg.45	100	0	0	97.5	0	0	99.58	99.58	99.58	99.58	99.58	99.58	100	0	0	0	0	0	0	0	0	0
Type IV secretion system protein VirD4	fig|6666666.157468.peg.46	100	99.43	100	25.13	25.13	25.13	100	100	100	100	100	100	100	0	25.13	0	0	0	25	0	0	25.22
Bores hole in peptidoglycan layer allowing type IV secretion complex assembly to occur (VirB1)	fig|6666666.157468.peg.50	100	99.11	98.9	0	0	0	100	100	100	100	100	100	100	0	0	0	0	0	0	0	0	0
Conjugative transfer protein TrbI	fig|6666666.157468.peg.52	100	27.53	99.66	27.53	27.53	98.97	100	100	100	100	100	100	100	0	31.07	0	0	0	28.09	0	0	28.09
Conjugative transfer protein TrbG	fig|6666666.157468.peg.54	100	100	100	0	0	98.98	100	100	100	100	100	100	100	0	47.73	0	0	0	47.25	0	0	46.15
Conjugative transfer protein TrbF	fig|6666666.157468.peg.55	100	0	0	0	0	98.7	100	100	100	100	100	100	100	0	0	0	0	0	0	0	0	0
Conjugative transfer protein TrbL	fig|6666666.157468.peg.57	100	0	0	0	0	99.26	99.75	100	100	100	99.75	100	99.75	0	0	0	0	0	0	0	0	0
Conjugative transfer protein TrbJ	fig|6666666.157468.peg.58	100	96.15	100	0	0	96.15	100	100	100	100	100	100	100	0	0	0	0	0	0	0	0	85.9
Conjugative transfer protein TrbJ	fig|6666666.157468.peg.59	100	100	83.87	0	0	100	100	100	83.87	100	100	83.87	100	0	27.8	0	0	0	0	0	0	0
IncQ plasmid conjugative transfer protein TraQ (RP4 TrbM homolog)	fig|6666666.157468.peg.60	100	100	36.86	36.86	36.86	100	100	100	100	100	100	100	100	0	36.86	0	0	0	35.57	0	0	36.76
Conjugative transfer protein TrbE	fig|6666666.157468.peg.61	100	24.06	99.59	24.06	97.66	98.77	99.88	99.88	99.88	99.88	99.88	99.88	100	0	23.49	0	0	0	22.75	0	0	23.17
Conjugative transfer protein TrbD	fig|6666666.157468.peg.62	100	0	98.95	0	100	100	100	100	100	100	100	100	100	0	0	0	0	0	0	0	0	0
Conjugative transfer protein TrbC	fig|6666666.157468.peg.63	100	0	100	0	97.96	0	100	100	100	100	100	100	100	0	0	0	0	0	0	0	0	0
Conjugative transfer protein TrbB	fig|6666666.157468.peg.64	100	30.92	99.56	30.6	100	30.6	100	100	100	100	100	100	100	30.92	30.92	32.43	30.92	30.92	35.51	30.92	30.92	34.78
IncP-type DNA relaxase TraI	fig|6666666.157468.peg.71	100	0	98.77	0	86.78	0	99.86	99.86	99.86	99.86	99.86	99.86	100	0	0	0	0	0	0	0	0	0
Plasmid partitioning protein ParA	fig|6666666.157468.peg.73	100	64.1	100	64.1	64.1	64.1	100	100	100	100	100	100	100	64.1	64.1	64.1	64.1	64.1	64.1	64.1	64.1	30.82
Major pilus subunit of type IV secretion complex, VirB2	fig|6666666.157468.peg.124	100	89.66	89.66	100	100	100	100	100	0	100	91.95	91.95	100	0	91.95	0	0	0	96	0	0	97.33
ATPase required for both assembly of type IV secretion complex and secretion of T-DNA complex, VirB4	fig|6666666.157468.peg.127	100	99.74	99.74	99.23	99.23	99.23	99.11	99.11	24.06	99.11	99.62	99.62	99.11	0	99.74	0	0	0	98.34	0	20.55	97.06
Minor pilin of type IV secretion complex, VirB5	fig|6666666.157468.peg.132	100	94.17	94.17	100	100	100	100	100	47.73	100	99.69	99.69	100	0	99.69	0	0	0	92.52	0	0	90.65
IncF plasmid conjugative transfer protein TraG	fig|6666666.157468.peg.152	100	100	100	0	0	0	0	0	88.14	0	0	0	0	0	79.09	80	0	0	80	94.55	48.21	98.31
MobA	fig|6666666.157468.peg.165	100	100	100	100	100	100	100	100	100	100	100	100	100	0	0	0	0	0	0	0	0	0
Mobile element protein	fig|6666666.157468.peg.455	100	99.7	99.7	26.95	26.95	26.95	27.85	27.85	100	27.85	27.85	27.85	0	0	0	0	35.9	0	0	29.79	37.24	0
TraG-like protein	fig|6666666.157468.peg.460	100	100	100	0	0	0	0	0	81.28	0	0	0	0	0	80	97.37	0	0	97.37	99.1	84.54	94.55
TraG-like protein	fig|6666666.157468.peg.461	100	100	100	0	0	0	0	0	0	0	0	0	0	0	0	0	0	0	0	100	0	0
TraG-like protein	fig|6666666.157468.peg.462	100	100	100	0	0	0	0	0	0	0	0	0	93.1	0	0	0	0	0	0	100	0	0
TraG-like protein	fig|6666666.157468.peg.463	100	100	100	0	0	0	0	0	92.31	0	0	0	98.08	0	0	0	0	0	0	97.69	0	92.44
IncF plasmid conjugative transfer protein TraN	fig|6666666.157468.peg.795	100	100	100	0	0	0	0	0	0	0	0	0	0	0	96.67	98.05	0	0	98.05	0	91.61	0
IncF plasmid conjugative transfer pilus assembly protein TraH	fig|6666666.157468.peg.798	100	100	100	0	0	0	0	0	0	0	0	0	0	0	0	0	0	0	0	0	95.29	0
IncF plasmid conjugative transfer pilus assembly protein TraC	fig|6666666.157468.peg.800	100	100	100	0	0	0	0	0	0	0	0	0	0	0	0	0	0	0	0	0	92.97	0
Conjugative transfer protein TraV	fig|6666666.157468.peg.803	100	100	100	0	0	0	0	0	0	0	0	0	0	0	0	0	0	0	0	0	92.07	0
IncF plasmid conjugative transfer pilus assembly protein TraB	fig|6666666.157468.peg.805	100	100	100	0	0	0	0	0	0	0	0	0	0	0	0	0	0	0	0	0	97.04	0
IncF plasmid conjugative transfer pilus assembly protein TraK	fig|6666666.157468.peg.806	100	100	100	0	0	0	0	0	0	0	0	0	0	0	0	0	0	0	0	0	97.78	0
IncF plasmid conjugative transfer pilus assembly protein TraE	fig|6666666.157468.peg.807	100	100	100	0	0	0	0	0	0	0	0	0	0	0	0	0	0	0	0	0	98.44	0
IncF plasmid conjugative transfer pilus assembly protein TraL	fig|6666666.157468.peg.808	100	100	100	0	0	0	0	0	0	0	0	0	0	0	0	0	0	0	0	0	98.02	0
Chromosome (plasmid) partitioning protein ParA	fig|6666666.157468.peg.1765	100	100	100	100	100	100	100	100	100	100	100	100	100	100	100	100	100	100	100	100	100	97.32
Chromosome (plasmid) partitioning protein ParB / Stage 0 sporulation protein J	fig|6666666.157468.peg.1766	100	100	100	99.28	99.28	99.28	99.64	99.64	99.64	99.64	99.28	99.28	99.64	99.64	100	99.28	99.64	99.64	100	98.56	98.92	70.86
TraD, putative	fig|6666666.157468.peg.1931	100	100	100	0	0	0	0	0	0	0	0	0	0	0	0	0	0	0	0	0	99.34	0
IncF plasmid conjugative transfer pilus assembly protein TraF	fig|6666666.157468.peg.1969	100	100	100	0	0	0	0	0	0	0	0	0	0	0	0	0	0	0	0	0	94.94	0
IncF plasmid conjugative transfer pilus assembly protein TraW	fig|6666666.157468.peg.1970	100	100	100	0	0	0	0	0	0	0	0	0	0	0	0	0	0	0	0	0	96.43	0
IncF plasmid conjugative transfer pilus assembly protein TraU	fig|6666666.157468.peg.1971	100	100	100	0	0	0	0	0	0	0	0	0	0	0	0	0	0	0	0	0	96.22	0
IncF plasmid conjugative transfer surface exclusion protein TraT	fig|6666666.157468.peg.1975	100	100	100	0	0	0	0	0	0	0	0	0	0	0	0	0	0	0	0	0	93.46	0
PHAGE ASSOCIATED
tail fiber protein H, putative	fig|6666666.157468.peg.41	100	0	0	0	0	0	100	100	100	100	0	0	0	0	0	96	0	98	0	0	0	0
Death on curing protein, Doc toxin	fig|6666666.157468.peg.97	100	100	100	0	0	0	0	0	0	0	0	0	0	0	0	0	0	0	0	0	96.74	0
Site-specific recombinase, resolvase family	fig|6666666.157468.peg.121	100	98.9	98.9	100	100	100	100	100	0	100	100	100	100	0	100	0	0	0	93.56	0	0	96.7
Phage Rha protein	fig|6666666.157468.peg.128	100	100	100	95.14	95.14	95.14	95.14	95.14	98.89	95.14	83.51	83.51	95.14	0	83.51	0	0	0	80.32	0	61.6	94.59
Phage related lysozyme	fig|6666666.157468.peg.140	100	100	100	0	0	0	0	0	0	0	0	0	0	0	0	0	0	0	0	0	0	95.57
Phage external scaffolding protein #Protein D	fig|6666666.157468.peg.143	100	100	0	0	100	0	100	0	100	0	100	0	0	0	0	0	0	0	0	0	0	0
Phage DNA replication protein	fig|6666666.157468.peg.144	100	99.71	0	0	0	0	100	0	0	0	100	0	0	0	0	0	0	0	0	0	0	0
Phage minor capsid protein - DNA pilot protein	fig|6666666.157468.peg.145	100	100	0	0	100	0	100	0	100	0	100	0	0	0	0	0	0	0	0	0	0	0
Phage major spike protein	fig|6666666.157468.peg.148	100	100	0	0	100	0	100	0	100	0	100	0	0	0	0	0	0	0	0	0	0	0
Putative phage protein	fig|6666666.157468.peg.231	100	100	100	0	0	0	0	0	0	0	0	0	96.72	0	0	0	0	0	0	0	95	0
bacteriophage DNA transposition protein A, putative	fig|6666666.157468.peg.1076	100	0	0	0	0	0	99.29	99.29	99.29	99.29	99.29	99.29	0	0	0	97.87	0	96.45	0	99.29	0	0
Prevent-host-death family protein	fig|6666666.157468.peg.1127	100	100	100	100	100	100	100	100	100	100	98.59	98.59	100	100	100	100	100	100	100	100	100	92.96
Integrase-recombinase protein XERCD family	fig|6666666.157468.peg.1189	100	100	100	100	100	100	99.44	99.44	99.44	99.44	99.44	99.44	98.87	99.44	99.72	99.72	99.44	99.44	99.72	99.72	98.87	90.65
DNA polymerase, bacteriophage-type (EC 2.7.7.7)	fig|6666666.157468.peg.1285	100	100	100	99.5	99.5	99.5	99.5	99.5	99.5	99.5	99.5	99.5	99.5	99.5	98.51	98.51	99.5	99.5	98.51	100	99.01	66.83
host-nuclease inhibitor protein Gam, putative	fig|6666666.157468.peg.1810	100	0	0	0	0	0	99.29	99.29	99.29	99.29	99.29	99.29	0	0	0	90.71	0	92.2	0	92.2	0	0
Putative phage tail protein	fig|6666666.157468.peg.1924	100	0	0	0	0	0	99.11	99.11	99.11	99.11	99.11	99.11	0	0	0	88.39	0	90.18	0	95.54	0	0
phage antirepressor protein	fig|6666666.157468.peg.1927	100	100	100	0	0	0	0	0	0	0	0	0	0	0	0	0	0	0	0	0	81.18	0
phage Rha protein	fig|6666666.157468.peg.1928	100	100	100	57.36	57.36	57.36	57.36	57.36	58.82	57.36	61.36	61.36	57.36	0	61.36	0	0	0	62.12	38.78	92.31	59.69
phage antirepressor protein	fig|6666666.157468.peg.1930	100	100	100	0	0	0	0	0	0	0	0	0	0	0	0	0	0	0	0	0	97.46	0
Death on curing protein, Doc toxin	fig|6666666.157468.peg.1983	100	100	100	0	0	0	0	0	0	0	0	0	0	0	46.59	46.59	0	0	46.59	0	98.86	100
